# Supplementary material for: A unified analysis of atlas single-cell data
Source: HighWire-hosted journal article supplement (doi:10.1101/gr.279631.124), 2025-02-18
Supplement: Supplemental_Table_S1.xlsx [file Supplemental_Table_S1.xlsx]

## Sheet: Table S1
Table S1: GO terms in embedding components.
component #	top 3 tissues	GO	name	branch	p fdr bh	fold change
component_1	Kidney	GO:0005452	inorganic anion exchanger activity	MF	0.00591674	2.95004
component_1	Kidney	GO:0003382	epithelial cell morphogenesis	BP	0.00928178	2.78219
component_1	Kidney	GO:0044273	sulfur compound catabolic process	BP	0.00574015	2.58105
component_1	Kidney	GO:0001954	positive regulation of cell-matrix adhesion	BP	0.000571236	2.54867
component_1	Kidney	GO:0035633	maintenance of blood-brain barrier	BP	0.000681713	2.51911
component_1	Kidney	GO:0097009	energy homeostasis	BP	0.00309003	2.46111
component_1	Kidney	GO:0045332	phospholipid translocation	BP	0.00608845	2.36956
component_1	Kidney	GO:0034204	lipid translocation	BP	0.00608845	2.36956
component_1	Kidney	GO:0010676	positive regulation of cellular carbohydrate metabolic process	BP	0.00621167	2.36032
component_1	Kidney	GO:0002042	cell migration involved in sprouting angiogenesis	BP	0.00214212	2.35425
component_1	Kidney	GO:0010507	negative regulation of autophagy	BP	0.000739024	2.34972
component_1	Kidney	GO:0043534	blood vessel endothelial cell migration	BP	0.000449184	2.31701
component_1	Kidney	GO:0048675	axon extension	BP	0.00770182	2.29432
component_1	Kidney	GO:0015701	bicarbonate transport	BP	0.00950081	2.24433
component_1	Kidney	GO:0043225	ATPase-coupled inorganic anion transmembrane transporter activity	MF	0.00591674	2.22007
component_1	Kidney	GO:0006029	proteoglycan metabolic process	BP	0.00208813	2.21963
component_1	Kidney	GO:0097035	regulation of membrane lipid distribution	BP	0.00592798	2.21397
component_1	Kidney	GO:0031532	actin cytoskeleton reorganization	BP	0.00592798	2.21311
component_1	Kidney	GO:0032993	protein-DNA complex	CC	0.000731703	2.17411
component_1	Kidney	GO:0043542	endothelial cell migration	BP	0.000221604	2.16046
component_1	Kidney	GO:1901890	positive regulation of cell junction assembly	BP	7.97522e-06	2.15616
component_1	Kidney	GO:0150116	regulation of cell-substrate junction organization	BP	0.00110426	2.10497
component_1	Kidney	GO:0000904	cell morphogenesis involved in differentiation	BP	1.40389e-06	2.09749
component_1	Kidney	GO:0060412	ventricular septum morphogenesis	BP	0.00524745	2.09704
component_1	Kidney	GO:0090109	regulation of cell-substrate junction assembly	BP	0.00211835	2.09689
component_1	Kidney	GO:0051893	regulation of focal adhesion assembly	BP	0.00211835	2.09689
component_1	Kidney	GO:0044070	regulation of anion transport	BP	0.00368114	2.04838
component_1	Kidney	GO:0019208	phosphatase regulator activity	MF	0.00141729	2.03221
component_1	Kidney	GO:0051963	regulation of synapse assembly	BP	0.000216368	2.02919
component_1	Kidney	GO:0051965	positive regulation of synapse assembly	BP	0.00935631	2.02786
component_1	Kidney	GO:0019888	protein phosphatase regulator activity	MF	0.00376281	2.00782
component_1	Kidney	GO:0000902	cell morphogenesis	BP	8.82931e-08	1.99568
component_1	Kidney	GO:1901888	regulation of cell junction assembly	BP	3.4217e-08	1.98766
component_1	Kidney	GO:0010631	epithelial cell migration	BP	0.000435395	1.969
component_1	Kidney	GO:0030175	filopodium	CC	0.00144271	1.91854
component_1	Kidney	GO:0034446	substrate adhesion-dependent cell spreading	BP	0.00335737	1.91234
component_1	Kidney	GO:1904375	regulation of protein localization to cell periphery	BP	0.00346471	1.90577
component_1	Kidney	GO:0005516	calmodulin binding	MF	0.00067736	1.90291
component_1	Kidney	GO:0046777	protein autophosphorylation	BP	9.25725e-05	1.89137
component_1	Kidney	GO:0001952	regulation of cell-matrix adhesion	BP	0.00035355	1.89072
component_1	Kidney	GO:0004725	protein tyrosine phosphatase activity	MF	0.00413116	1.88834
component_1	Kidney	GO:1903076	regulation of protein localization to plasma membrane	BP	0.00854465	1.87505
component_1	Kidney	GO:0010811	positive regulation of cell-substrate adhesion	BP	0.00863206	1.87071
component_1	Kidney	GO:0051962	positive regulation of nervous system development	BP	3.37334e-06	1.8658
component_1	Kidney	GO:0014706	striated muscle tissue development	BP	0.00626599	1.84056
component_1	Kidney	GO:0004714	transmembrane receptor protein tyrosine kinase activity	MF	0.00141132	1.83999
component_1	Kidney	GO:0004713	protein tyrosine kinase activity	MF	0.000114703	1.81169
component_1	Kidney	GO:0003179	heart valve morphogenesis	BP	0.00627701	1.8003
component_1	Kidney	GO:0007420	brain development	BP	0.00120595	1.79483
component_1	Kidney	GO:0098631	cell adhesion mediator activity	MF	0.00441986	1.79419
component_1	Kidney	GO:0034451	centriolar satellite	CC	0.00813431	1.7807
component_1	Kidney	GO:0019199	transmembrane receptor protein kinase activity	MF	0.000512625	1.77804
component_1	Kidney	GO:0003014	renal system process	BP	0.00295336	1.76938
component_1	Kidney	GO:0050770	regulation of axonogenesis	BP	0.00186754	1.76653
component_1	Kidney	GO:0098858	actin-based cell projection	CC	0.00100844	1.76191
component_1	Kidney	GO:0099537	trans-synaptic signaling	BP	4.22295e-08	1.74875
component_1	Kidney	GO:0099536	synaptic signaling	BP	4.22295e-08	1.74875
component_1	Kidney	GO:0007268	chemical synaptic transmission	BP	2.58987e-07	1.74174
component_1	Kidney	GO:0098916	anterograde trans-synaptic signaling	BP	2.58987e-07	1.74174
component_1	Kidney	GO:0050769	positive regulation of neurogenesis	BP	0.00183576	1.73746
component_1	Kidney	GO:0031589	cell-substrate adhesion	BP	4.70919e-05	1.73728
component_1	Kidney	GO:0001667	ameboidal-type cell migration	BP	0.0011888	1.73425
component_1	Kidney	GO:0007275	multicellular organism development	BP	1.1918e-06	1.73381
component_1	Kidney	GO:0031346	positive regulation of cell projection organization	BP	1.13225e-05	1.72811
component_1	Kidney	GO:0061695	transferase complex, transferring phosphorus-containing groups	CC	0.00472563	1.71219
component_1	Kidney	GO:0010720	positive regulation of cell development	BP	0.000315572	1.70201
component_1	Kidney	GO:0010810	regulation of cell-substrate adhesion	BP	0.000331322	1.69673
component_1	Kidney	GO:0060491	regulation of cell projection assembly	BP	0.00636952	1.68021
component_1	Kidney	GO:0120032	regulation of plasma membrane bounded cell projection assembly	BP	0.00636952	1.68021
component_1	Kidney	GO:0001525	angiogenesis	BP	0.000127917	1.68018
component_1	Kidney	GO:0030295	protein kinase activator activity	MF	0.00981585	1.67916
component_1	Kidney	GO:0019209	kinase activator activity	MF	0.00981585	1.67916
component_1	Kidney	GO:0031984	organelle subcompartment	CC	0.00017633	1.67884
component_1	Kidney	GO:0007160	cell-matrix adhesion	BP	0.00975185	1.67393
component_1	Kidney	GO:0098794	postsynapse	CC	0.00328111	1.66289
component_1	Kidney	GO:0050807	regulation of synapse organization	BP	0.00170103	1.65998
component_1	Kidney	GO:0005262	calcium channel activity	MF	0.00764539	1.65765
component_1	Kidney	GO:0051960	regulation of nervous system development	BP	9.67151e-06	1.64923
component_1	Kidney	GO:0000209	protein polyubiquitination	BP	0.00657964	1.63762
component_1	Kidney	GO:0050808	synapse organization	BP	0.000676111	1.63704
component_1	Kidney	GO:0098791	Golgi apparatus subcompartment	CC	0.00120219	1.63693
component_1	Kidney	GO:0006470	protein dephosphorylation	BP	0.00668487	1.63472
component_1	Kidney	GO:0007399	nervous system development	BP	5.48391e-05	1.63293
component_1	Kidney	GO:0019838	growth factor binding	MF	0.000447144	1.61971
component_1	Kidney	GO:0031344	regulation of cell projection organization	BP	3.61843e-08	1.61849
component_1	Kidney	GO:1905475	regulation of protein localization to membrane	BP	0.00915359	1.61347
component_1	Kidney	GO:0005802	trans-Golgi network	CC	0.0030888	1.61234
component_1	Kidney	GO:0120035	regulation of plasma membrane bounded cell projection organization	BP	7.72553e-08	1.60778
component_1	Kidney	GO:0010975	regulation of neuron projection development	BP	2.72395e-05	1.60106
component_1	Kidney	GO:0001501	skeletal system development	BP	0.0083331	1.59844
component_1	Kidney	GO:0005912	adherens junction	CC	0.00395062	1.59658
component_1	Kidney	GO:0019207	kinase regulator activity	MF	0.00067736	1.59592
component_1	Kidney	GO:0019887	protein kinase regulator activity	MF	0.00242976	1.58302
component_1	Kidney	GO:0046943	carboxylic acid transmembrane transporter activity	MF	0.00864584	1.57227
component_1	Kidney	GO:0005342	organic acid transmembrane transporter activity	MF	0.00864584	1.57227
component_1	Kidney	GO:0060284	regulation of cell development	BP	4.82344e-05	1.57107
component_1	Kidney	GO:0034330	cell junction organization	BP	2.65776e-06	1.57045
component_1	Kidney	GO:0035239	tube morphogenesis	BP	0.00678109	1.56875
component_1	Kidney	GO:0045202	synapse	CC	2.25171e-06	1.56508
component_1	Kidney	GO:0051056	regulation of small GTPase mediated signal transduction	BP	0.000928897	1.55575
component_1	Kidney	GO:0009653	anatomical structure morphogenesis	BP	1.27559e-14	1.55181
component_1	Kidney	GO:0050767	regulation of neurogenesis	BP	0.00216101	1.54665
component_1	Kidney	GO:1901652	response to peptide	BP	0.00707307	1.53377
component_1	Kidney	GO:0022836	gated channel activity	MF	0.000631928	1.52354
component_1	Kidney	GO:0048731	system development	BP	4.22295e-08	1.5209
component_1	Kidney	GO:1990234	transferase complex	CC	9.70399e-05	1.51938
component_1	Kidney	GO:0032970	regulation of actin filament-based process	BP	0.000367637	1.51385
component_1	Kidney	GO:0007169	transmembrane receptor protein tyrosine kinase signaling pathway	BP	2.58888e-05	1.51032
component_1	Kidney	GO:0034329	cell junction assembly	BP	0.00157236	1.49662
component_1	Kidney	GO:0007167	enzyme linked receptor protein signaling pathway	BP	1.72451e-06	1.49547
component_1	Kidney	GO:0048646	anatomical structure formation involved in morphogenesis	BP	1.00705e-05	1.49379
component_1	Kidney	GO:0019898	extrinsic component of membrane	CC	0.00894672	1.49372
component_1	Kidney	GO:0016324	apical plasma membrane	CC	0.0011593	1.49276
component_1	Kidney	GO:0009888	tissue development	BP	0.000216684	1.49242
component_1	Kidney	GO:0060589	nucleoside-triphosphatase regulator activity	MF	0.00125053	1.48734
component_1	Kidney	GO:0030695	GTPase regulator activity	MF	0.00125053	1.48734
component_1	Kidney	GO:0010639	negative regulation of organelle organization	BP	0.00674903	1.48623
component_1	Kidney	GO:0048513	animal organ development	BP	7.72553e-08	1.48511
component_1	Kidney	GO:0048856	anatomical structure development	BP	1.44622e-21	1.47357
component_1	Kidney	GO:0006468	protein phosphorylation	BP	3.12997e-05	1.47336
component_1	Kidney	GO:0098857	membrane microdomain	CC	0.00129714	1.4714
component_1	Kidney	GO:0045121	membrane raft	CC	0.00129714	1.4714
component_1	Kidney	GO:0016310	phosphorylation	BP	9.00174e-06	1.47129
component_1	Kidney	GO:0005813	centrosome	CC	0.00101412	1.4662
component_1	Kidney	GO:0003013	circulatory system process	BP	0.00202404	1.46457
component_1	Kidney	GO:0016773	phosphotransferase activity, alcohol group as acceptor	MF	2.4603e-05	1.46111
component_1	Kidney	GO:0004672	protein kinase activity	MF	0.000133949	1.45884
component_1	Kidney	GO:0051128	regulation of cellular component organization	BP	1.74491e-18	1.45564
component_1	Kidney	GO:0030054	cell junction	CC	1.31958e-13	1.45387
component_1	Kidney	GO:0003018	vascular process in circulatory system	BP	0.0083331	1.45255
component_1	Kidney	GO:0004674	protein serine/threonine kinase activity	MF	0.00887657	1.45144
component_1	Kidney	GO:0097485	neuron projection guidance	BP	0.00854465	1.44814
component_1	Kidney	GO:0007411	axon guidance	BP	0.00854465	1.44814
component_1	Kidney	GO:0090407	organophosphate biosynthetic process	BP	0.00854592	1.44774
component_1	Kidney	GO:0032956	regulation of actin cytoskeleton organization	BP	0.00717725	1.44719
component_1	Kidney	GO:0140535	intracellular protein-containing complex	CC	0.00100844	1.44704
component_1	Kidney	GO:0042391	regulation of membrane potential	BP	0.00056534	1.44581
component_1	Kidney	GO:0043235	receptor complex	CC	7.834e-06	1.44491
component_1	Kidney	GO:0006793	phosphorus metabolic process	BP	1.47531e-10	1.44458
component_1	Kidney	GO:0005216	ion channel activity	MF	0.000521389	1.44411
component_1	Kidney	GO:0008047	enzyme activator activity	MF	0.000571326	1.44116
component_1	Kidney	GO:0005261	cation channel activity	MF	0.00337361	1.44038
component_1	Kidney	GO:0051130	positive regulation of cellular component organization	BP	5.46748e-08	1.44019
component_1	Kidney	GO:0098742	cell-cell adhesion via plasma-membrane adhesion molecules	BP	0.00243388	1.43868
component_1	Kidney	GO:0023052	signaling	BP	1.31594e-06	1.43809
component_1	Kidney	GO:0006796	phosphate-containing compound metabolic process	BP	4.49511e-10	1.43748
component_1	Kidney	GO:0007267	cell-cell signaling	BP	5.80971e-06	1.4374
component_1	Kidney	GO:0005925	focal adhesion	CC	0.000187723	1.43608
component_1	Kidney	GO:0044087	regulation of cellular component biogenesis	BP	5.49269e-07	1.43558
component_1	Kidney	GO:0034762	regulation of transmembrane transport	BP	0.000639277	1.43196
component_1	Kidney	GO:0030055	cell-substrate junction	CC	0.00017961	1.42906
component_1	Kidney	GO:0050839	cell adhesion molecule binding	MF	8.58809e-06	1.4237
component_1	Kidney	GO:0016301	kinase activity	MF	6.17824e-05	1.42223
component_1	Kidney	GO:0032502	developmental process	BP	1.5905e-31	1.42009
component_1	Kidney	GO:0044089	positive regulation of cellular component biogenesis	BP	0.00143132	1.42009
component_1	Kidney	GO:0022803	passive transmembrane transporter activity	MF	0.000571326	1.41907
component_1	Kidney	GO:0015267	channel activity	MF	0.000571326	1.41907
component_1	Kidney	GO:0034654	nucleobase-containing compound biosynthetic process	BP	0.00874367	1.41393
component_1	Kidney	GO:0030424	axon	CC	0.00813431	1.41369
component_1	Kidney	GO:0005815	microtubule organizing center	CC	0.00139872	1.40754
component_1	Kidney	GO:0051090	regulation of DNA-binding transcription factor activity	BP	0.00394403	1.40543
component_1	Kidney	GO:0030234	enzyme regulator activity	MF	2.07149e-07	1.40451
component_1	Kidney	GO:0034765	regulation of ion transmembrane transport	BP	0.00603133	1.40386
component_1	Kidney	GO:0019901	protein kinase binding	MF	0.000521389	1.4035
component_1	Kidney	GO:0007154	cell communication	BP	1.46764e-06	1.40326
component_1	Kidney	GO:0016772	transferase activity, transferring phosphorus-containing groups	MF	6.17824e-05	1.40258
component_1	Kidney	GO:0019900	kinase binding	MF	0.000201275	1.40053
component_1	Kidney	GO:0006464	cellular protein modification process	BP	2.7981e-12	1.39957
component_1	Kidney	GO:0036211	protein modification process	BP	2.7981e-12	1.39957
component_1	Kidney	GO:0140513	nuclear protein-containing complex	CC	7.12354e-05	1.39855
component_1	Kidney	GO:0043412	macromolecule modification	BP	8.73322e-13	1.39525
component_1	Kidney	GO:0070161	anchoring junction	CC	5.60324e-07	1.39399
component_1	Kidney	GO:0031400	negative regulation of protein modification process	BP	0.00449213	1.39266
component_1	Kidney	GO:1902494	catalytic complex	CC	5.60422e-06	1.39134
component_1	Kidney	GO:0051493	regulation of cytoskeleton organization	BP	0.00242701	1.3905
component_1	Kidney	GO:0005911	cell-cell junction	CC	0.00108439	1.38462
component_1	Kidney	GO:0045595	regulation of cell differentiation	BP	1.93157e-08	1.38392
component_1	Kidney	GO:0098590	plasma membrane region	CC	4.08644e-07	1.37814
component_1	Kidney	GO:1901135	carbohydrate derivative metabolic process	BP	0.00593499	1.37736
component_1	Kidney	GO:0048869	cellular developmental process	BP	5.21456e-12	1.37421
component_1	Kidney	GO:0098797	plasma membrane protein complex	CC	4.60679e-05	1.37343
component_1	Kidney	GO:0051129	negative regulation of cellular component organization	BP	0.000439222	1.3712
component_1	Kidney	GO:0005794	Golgi apparatus	CC	6.65536e-05	1.36973
component_1	Kidney	GO:0016604	nuclear body	CC	0.00239459	1.36972
component_1	Kidney	GO:0019637	organophosphate metabolic process	BP	0.00696128	1.36484
component_1	Kidney	GO:0044267	cellular protein metabolic process	BP	3.12763e-11	1.36315
component_1	Kidney	GO:0044255	cellular lipid metabolic process	BP	0.000561722	1.35818
component_1	Kidney	GO:0030154	cell differentiation	BP	2.71097e-07	1.35728
component_1	Kidney	GO:0032501	multicellular organismal process	BP	2.33712e-12	1.3558
component_1	Kidney	GO:0051270	regulation of cellular component movement	BP	4.95199e-07	1.35502
component_1	Kidney	GO:0045596	negative regulation of cell differentiation	BP	0.00641973	1.35104
component_1	Kidney	GO:0098609	cell-cell adhesion	BP	0.000367637	1.3484
component_1	Kidney	GO:0005768	endosome	CC	0.00225671	1.34717
component_1	Kidney	GO:0040012	regulation of locomotion	BP	2.0676e-06	1.34538
component_1	Kidney	GO:0045944	positive regulation of transcription by RNA polymerase II	BP	0.000155076	1.34402
component_1	Kidney	GO:0000122	negative regulation of transcription by RNA polymerase II	BP	0.00128243	1.34351
component_1	Kidney	GO:0016740	transferase activity	MF	7.87519e-09	1.34271
component_1	Kidney	GO:0043269	regulation of ion transport	BP	0.00502174	1.34155
component_1	Kidney	GO:0018193	peptidyl-amino acid modification	BP	0.0046603	1.3407
component_1	Kidney	GO:0044260	cellular macromolecule metabolic process	BP	7.71234e-14	1.34057
component_1	Kidney	GO:2000145	regulation of cell motility	BP	5.4427e-06	1.33745
component_1	Kidney	GO:0042325	regulation of phosphorylation	BP	2.18378e-06	1.33518
component_1	Kidney	GO:0051093	negative regulation of developmental process	BP	0.000888483	1.3338
component_1	Kidney	GO:0043005	neuron projection	CC	0.00017961	1.33202
component_1	Kidney	GO:0045597	positive regulation of cell differentiation	BP	0.00121416	1.32996
component_1	Kidney	GO:0019220	regulation of phosphate metabolic process	BP	8.04451e-07	1.32964
component_1	Kidney	GO:0051174	regulation of phosphorus metabolic process	BP	8.04451e-07	1.32964
component_1	Kidney	GO:0051094	positive regulation of developmental process	BP	1.88005e-05	1.32738
component_1	Kidney	GO:0044281	small molecule metabolic process	BP	0.000109542	1.32419
component_1	Kidney	GO:0060341	regulation of cellular localization	BP	0.00464408	1.32303
component_1	Kidney	GO:0032879	regulation of localization	BP	2.32027e-13	1.32243
component_1	Kidney	GO:0030334	regulation of cell migration	BP	2.68991e-05	1.32186
component_1	Kidney	GO:0003008	system process	BP	2.4154e-05	1.31912
component_1	Kidney	GO:0001932	regulation of protein phosphorylation	BP	3.09706e-05	1.31809
component_1	Kidney	GO:0051254	positive regulation of RNA metabolic process	BP	9.43696e-06	1.31446
component_1	Kidney	GO:0019538	protein metabolic process	BP	3.84344e-11	1.31226
component_1	Kidney	GO:0016070	RNA metabolic process	BP	0.00935631	1.31075
component_1	Kidney	GO:0035556	intracellular signal transduction	BP	4.62349e-05	1.30936
component_1	Kidney	GO:0033043	regulation of organelle organization	BP	0.00035355	1.30922
component_1	Kidney	GO:0032880	regulation of protein localization	BP	0.00616752	1.30605
component_1	Kidney	GO:0050793	regulation of developmental process	BP	6.27522e-09	1.30382
component_1	Kidney	GO:0051172	negative regulation of nitrogen compound metabolic process	BP	1.83168e-07	1.30356
component_1	Kidney	GO:0045937	positive regulation of phosphate metabolic process	BP	0.000403444	1.3021
component_1	Kidney	GO:0010562	positive regulation of phosphorus metabolic process	BP	0.000403444	1.3021
component_1	Kidney	GO:0070727	cellular macromolecule localization	BP	0.00609983	1.30071
component_1	Kidney	GO:0034613	cellular protein localization	BP	0.00609983	1.30071
component_1	Kidney	GO:0006629	lipid metabolic process	BP	0.00174338	1.29983
component_1	Kidney	GO:0097367	carbohydrate derivative binding	MF	0.00337361	1.29925
component_1	Kidney	GO:0006807	nitrogen compound metabolic process	BP	2.51347e-17	1.29916
component_1	Kidney	GO:0044092	negative regulation of molecular function	BP	0.00164146	1.29786
component_1	Kidney	GO:0140096	catalytic activity, acting on a protein	MF	3.78302e-07	1.29525
component_1	Kidney	GO:0051641	cellular localization	BP	2.04718e-05	1.29518
component_1	Kidney	GO:0043549	regulation of kinase activity	BP	0.00457389	1.29512
component_1	Kidney	GO:1901564	organonitrogen compound metabolic process	BP	2.32027e-13	1.29448
component_1	Kidney	GO:0051272	positive regulation of cellular component movement	BP	0.00707307	1.2941
component_1	Kidney	GO:0046483	heterocycle metabolic process	BP	2.60034e-05	1.29404
component_1	Kidney	GO:0032269	negative regulation of cellular protein metabolic process	BP	0.00678109	1.29355
component_1	Kidney	GO:0040017	positive regulation of locomotion	BP	0.00696128	1.2927
component_1	Kidney	GO:0045893	positive regulation of transcription, DNA-templated	BP	0.000135409	1.29191
component_1	Kidney	GO:1903508	positive regulation of nucleic acid-templated transcription	BP	0.000135409	1.29191
component_1	Kidney	GO:1902680	positive regulation of RNA biosynthetic process	BP	0.000135409	1.29191
component_1	Kidney	GO:0044238	primary metabolic process	BP	1.03845e-17	1.2914
component_1	Kidney	GO:0022610	biological adhesion	BP	0.000163365	1.28913
component_1	Kidney	GO:0007155	cell adhesion	BP	0.000163365	1.28913
component_1	Kidney	GO:0045935	positive regulation of nucleobase-containing compound metabolic process	BP	1.46238e-05	1.28834
component_1	Kidney	GO:0031399	regulation of protein modification process	BP	3.4693e-05	1.28735
component_1	Kidney	GO:0010605	negative regulation of macromolecule metabolic process	BP	5.30192e-08	1.28619
component_1	Kidney	GO:0031324	negative regulation of cellular metabolic process	BP	3.85489e-07	1.28595
component_1	Kidney	GO:0042327	positive regulation of phosphorylation	BP	0.00274997	1.28434
component_1	Kidney	GO:0022603	regulation of anatomical structure morphogenesis	BP	0.00205749	1.28372
component_1	Kidney	GO:0006139	nucleobase-containing compound metabolic process	BP	0.000388175	1.2811
component_1	Kidney	GO:0120025	plasma membrane bounded cell projection	CC	0.000131441	1.28106
component_1	Kidney	GO:0048870	cell motility	BP	0.000669179	1.28084
component_1	Kidney	GO:0005654	nucleoplasm	CC	7.21214e-10	1.27878
component_1	Kidney	GO:2000026	regulation of multicellular organismal development	BP	0.000295075	1.27794
component_1	Kidney	GO:0045934	negative regulation of nucleobase-containing compound metabolic process	BP	0.000936264	1.27771
component_1	Kidney	GO:0051338	regulation of transferase activity	BP	0.00444355	1.27654
component_1	Kidney	GO:0009892	negative regulation of metabolic process	BP	5.11171e-08	1.27428
component_1	Kidney	GO:0005737	cytoplasm	CC	5.93163e-14	1.27424
component_1	Kidney	GO:0098796	membrane protein complex	CC	0.000253472	1.27365
component_1	Kidney	GO:0051241	negative regulation of multicellular organismal process	BP	0.0031105	1.2718
component_1	Kidney	GO:0033036	macromolecule localization	BP	0.00208964	1.27086
component_1	Kidney	GO:0051252	regulation of RNA metabolic process	BP	1.61722e-10	1.27039
component_1	Kidney	GO:0043170	macromolecule metabolic process	BP	2.65499e-12	1.26957
component_1	Kidney	GO:0010557	positive regulation of macromolecule biosynthetic process	BP	0.000135409	1.26914
component_1	Kidney	GO:0040011	locomotion	BP	0.000881549	1.26875
component_1	Kidney	GO:0031325	positive regulation of cellular metabolic process	BP	5.53537e-09	1.26803
component_1	Kidney	GO:0051049	regulation of transport	BP	2.04779e-05	1.26803
component_1	Kidney	GO:0044237	cellular metabolic process	BP	2.29376e-16	1.26739
component_1	Kidney	GO:0016477	cell migration	BP	0.00295529	1.26706
component_1	Kidney	GO:0042995	cell projection	CC	0.000202129	1.26699
component_1	Kidney	GO:0031328	positive regulation of cellular biosynthetic process	BP	9.28329e-05	1.26697
component_1	Kidney	GO:0051173	positive regulation of nitrogen compound metabolic process	BP	1.65441e-08	1.26681
component_1	Kidney	GO:0051171	regulation of nitrogen compound metabolic process	BP	5.58739e-16	1.26409
component_1	Kidney	GO:0006357	regulation of transcription by RNA polymerase II	BP	7.56635e-07	1.26402
component_1	Kidney	GO:0051649	establishment of localization in cell	BP	0.00179838	1.26317
component_1	Kidney	GO:0008104	protein localization	BP	0.00368295	1.26065
component_1	Kidney	GO:0032268	regulation of cellular protein metabolic process	BP	8.33767e-06	1.25932
component_1	Kidney	GO:0031323	regulation of cellular metabolic process	BP	2.04132e-16	1.2593
component_1	Kidney	GO:1901360	organic cyclic compound metabolic process	BP	0.000103104	1.2584
component_1	Kidney	GO:0071704	organic substance metabolic process	BP	2.75286e-16	1.25836
component_1	Kidney	GO:0048523	negative regulation of cellular process	BP	1.47996e-13	1.25732
component_1	Kidney	GO:0005829	cytosol	CC	3.3921e-14	1.2553
component_1	Kidney	GO:0080090	regulation of primary metabolic process	BP	3.25065e-15	1.25366
component_1	Kidney	GO:0019219	regulation of nucleobase-containing compound metabolic process	BP	9.36913e-10	1.25276
component_1	Kidney	GO:0065009	regulation of molecular function	BP	3.68111e-07	1.25123
component_1	Kidney	GO:0044249	cellular biosynthetic process	BP	0.00143132	1.25048
component_1	Kidney	GO:0009891	positive regulation of biosynthetic process	BP	0.000274295	1.24973
component_1	Kidney	GO:0010604	positive regulation of macromolecule metabolic process	BP	6.06046e-09	1.24933
component_1	Kidney	GO:0006928	movement of cell or subcellular component	BP	0.000227656	1.24913
component_1	Kidney	GO:0098772	molecular function regulator	MF	6.89439e-05	1.24877
component_1	Kidney	GO:0010558	negative regulation of macromolecule biosynthetic process	BP	0.00500073	1.24864
component_1	Kidney	GO:0048585	negative regulation of response to stimulus	BP	0.000243611	1.24826
component_1	Kidney	GO:1903506	regulation of nucleic acid-templated transcription	BP	3.4217e-08	1.24824
component_1	Kidney	GO:0006355	regulation of transcription, DNA-templated	BP	3.4217e-08	1.24824
component_1	Kidney	GO:2001141	regulation of RNA biosynthetic process	BP	4.77535e-08	1.24576
component_1	Kidney	GO:0005886	plasma membrane	CC	1.02905e-16	1.24568
component_1	Kidney	GO:0051179	localization	BP	2.05776e-10	1.24474
component_1	Kidney	GO:0051253	negative regulation of RNA metabolic process	BP	0.00868837	1.24367
component_1	Kidney	GO:0032991	protein-containing complex	CC	3.67061e-13	1.24354
component_1	Kidney	GO:0010556	regulation of macromolecule biosynthetic process	BP	9.23385e-09	1.24349
component_1	Kidney	GO:0031326	regulation of cellular biosynthetic process	BP	5.95644e-09	1.2415
component_1	Kidney	GO:0048519	negative regulation of biological process	BP	2.25527e-13	1.2415
component_1	Kidney	GO:0019899	enzyme binding	MF	0.000133949	1.24027
component_1	Kidney	GO:0031327	negative regulation of cellular biosynthetic process	BP	0.00657964	1.23814
component_1	Kidney	GO:0009889	regulation of biosynthetic process	BP	7.84335e-09	1.23792
component_1	Kidney	GO:0006725	cellular aromatic compound metabolic process	BP	0.00150497	1.23785
component_1	Kidney	GO:0009890	negative regulation of biosynthetic process	BP	0.00587815	1.23772
component_1	Kidney	GO:0051246	regulation of protein metabolic process	BP	3.06848e-05	1.2375
component_1	Kidney	GO:0006996	organelle organization	BP	0.000484197	1.2365
component_1	Kidney	GO:0023051	regulation of signaling	BP	1.73559e-08	1.23579
component_1	Kidney	GO:0010646	regulation of cell communication	BP	2.25103e-08	1.2336
component_1	Kidney	GO:0009058	biosynthetic process	BP	0.00279657	1.23308
component_1	Kidney	GO:0031410	cytoplasmic vesicle	CC	0.00328111	1.23227
component_1	Kidney	GO:0097708	intracellular vesicle	CC	0.00328111	1.23201
component_1	Kidney	GO:0006811	ion transport	BP	0.00368773	1.23173
component_1	Kidney	GO:0048522	positive regulation of cellular process	BP	1.47996e-13	1.23012
component_1	Kidney	GO:0034641	cellular nitrogen compound metabolic process	BP	0.000475384	1.22879
component_1	Kidney	GO:0043229	intracellular organelle	CC	2.35623e-24	1.22847
component_1	Kidney	GO:0071702	organic substance transport	BP	0.00608845	1.22828
component_1	Kidney	GO:0000976	transcription cis-regulatory region binding	MF	0.00413116	1.22762
component_1	Kidney	GO:0001067	transcription regulatory region nucleic acid binding	MF	0.00413116	1.22762
component_1	Kidney	GO:0043231	intracellular membrane-bounded organelle	CC	2.25702e-20	1.22733
component_1	Kidney	GO:1901576	organic substance biosynthetic process	BP	0.00485881	1.22727
component_1	Kidney	GO:0008152	metabolic process	BP	8.52723e-14	1.22718
component_1	Kidney	GO:0010468	regulation of gene expression	BP	6.81157e-10	1.22388
component_1	Kidney	GO:1990837	sequence-specific double-stranded DNA binding	MF	0.00413116	1.22293
component_1	Kidney	GO:0060255	regulation of macromolecule metabolic process	BP	2.64295e-13	1.22269
component_1	Kidney	GO:0140110	transcription regulator activity	MF	0.00159306	1.22265
component_1	Kidney	GO:0003676	nucleic acid binding	MF	1.64204e-05	1.22162
component_1	Kidney	GO:0031226	intrinsic component of plasma membrane	CC	0.000108622	1.2207
component_1	Kidney	GO:0000977	RNA polymerase II transcription regulatory region sequence-specific DNA binding	MF	0.00908994	1.22053
component_1	Kidney	GO:0005215	transporter activity	MF	0.0058979	1.22013
component_1	Kidney	GO:0009967	positive regulation of signal transduction	BP	0.00251459	1.21944
component_1	Kidney	GO:0009966	regulation of signal transduction	BP	1.87034e-06	1.21718
component_1	Kidney	GO:0051234	establishment of localization	BP	4.95199e-07	1.21718
component_1	Kidney	GO:0006810	transport	BP	8.76624e-07	1.21675
component_1	Kidney	GO:0009893	positive regulation of metabolic process	BP	9.82937e-08	1.21627
component_1	Kidney	GO:0003690	double-stranded DNA binding	MF	0.00441986	1.21485
component_1	Kidney	GO:0005634	nucleus	CC	4.24095e-09	1.2145
component_1	Kidney	GO:0016043	cellular component organization	BP	7.22729e-09	1.21449
component_1	Kidney	GO:0044093	positive regulation of molecular function	BP	0.00372347	1.21432
component_1	Kidney	GO:0043565	sequence-specific DNA binding	MF	0.00583812	1.21393
component_1	Kidney	GO:0019222	regulation of metabolic process	BP	4.71595e-13	1.20894
component_1	Kidney	GO:0060089	molecular transducer activity	MF	0.00904044	1.20731
component_1	Kidney	GO:0038023	signaling receptor activity	MF	0.00904044	1.20731
component_1	Kidney	GO:0005887	integral component of plasma membrane	CC	0.000618176	1.20687
component_1	Kidney	GO:0003824	catalytic activity	MF	7.87519e-09	1.20655
component_1	Kidney	GO:0048518	positive regulation of biological process	BP	2.10597e-12	1.20477
component_1	Kidney	GO:0016020	membrane	CC	8.81604e-18	1.20277
component_1	Kidney	GO:0071840	cellular component organization or biogenesis	BP	4.55176e-08	1.20256
component_1	Kidney	GO:0043226	organelle	CC	2.14279e-24	1.19951
component_1	Kidney	GO:0043167	ion binding	MF	0.00210873	1.19948
component_1	Kidney	GO:0043227	membrane-bounded organelle	CC	5.1727e-21	1.19791
component_1	Kidney	GO:0050794	regulation of cellular process	BP	2.58747e-24	1.19766
component_1	Kidney	GO:0005515	protein binding	MF	2.00402e-39	1.19537
component_1	Kidney	GO:0009987	cellular process	BP	2.81735e-35	1.19453
component_1	Kidney	GO:0097159	organic cyclic compound binding	MF	1.64204e-05	1.19389
component_1	Kidney	GO:0023056	positive regulation of signaling	BP	0.00678109	1.19315
component_1	Kidney	GO:0065007	biological regulation	BP	1.24005e-27	1.19228
component_1	Kidney	GO:0050789	regulation of biological process	BP	8.00922e-25	1.1922
component_1	Kidney	GO:0005488	binding	MF	3.07812e-44	1.19045
component_1	Kidney	GO:1901363	heterocyclic compound binding	MF	3.92456e-05	1.18996
component_1	Kidney	GO:0065008	regulation of biological quality	BP	2.90296e-05	1.18873
component_1	Kidney	GO:0003674	molecular_function	MF	3.06641e-55	1.18796
component_1	Kidney	GO:0003677	DNA binding	MF	0.00683447	1.18769
component_1	Kidney	GO:0110165	cellular anatomical entity	CC	9.62185e-54	1.18443
component_1	Kidney	GO:0051239	regulation of multicellular organismal process	BP	0.000295075	1.1841
component_1	Kidney	GO:0050790	regulation of catalytic activity	BP	0.00748621	1.18313
component_1	Kidney	GO:0005575	cellular_component	CC	9.62185e-54	1.18231
component_1	Kidney	GO:0043232	intracellular non-membrane-bounded organelle	CC	0.00144271	1.18019
component_1	Kidney	GO:0043228	non-membrane-bounded organelle	CC	0.00144271	1.18019
component_1	Kidney	GO:0048583	regulation of response to stimulus	BP	1.99705e-06	1.18004
component_1	Kidney	GO:0098588	bounding membrane of organelle	CC	0.00977395	1.17997
component_1	Kidney	GO:0008150	biological_process	BP	1.71494e-44	1.17947
component_1	Kidney	GO:0007165	signal transduction	BP	2.53945e-06	1.17757
component_1	Kidney	GO:0031224	intrinsic component of membrane	CC	0.000358434	1.17636
component_1	Kidney	GO:0016021	integral component of membrane	CC	0.00139872	1.16848
component_1	Kidney	GO:0031090	organelle membrane	CC	0.00322788	1.16192
component_2	Kidney	GO:2000463	positive regulation of excitatory postsynaptic potential	BP	0.00988429	2.47012
component_2	Kidney	GO:0098948	intrinsic component of postsynaptic specialization membrane	CC	0.00138674	2.44579
component_2	Kidney	GO:0099060	integral component of postsynaptic specialization membrane	CC	0.00138674	2.44579
component_2	Kidney	GO:0099055	integral component of postsynaptic membrane	CC	0.00138674	2.44579
component_2	Kidney	GO:0045332	phospholipid translocation	BP	0.0063305	2.38234
component_2	Kidney	GO:0034204	lipid translocation	BP	0.0063305	2.38234
component_2	Kidney	GO:0006664	glycolipid metabolic process	BP	0.00276383	2.32052
component_2	Kidney	GO:1903509	liposaccharide metabolic process	BP	0.00101138	2.32016
component_2	Kidney	GO:0098901	regulation of cardiac muscle cell action potential	BP	0.00832243	2.30888
component_2	Kidney	GO:0051965	positive regulation of synapse assembly	BP	0.000557134	2.29365
component_2	Kidney	GO:0006940	regulation of smooth muscle contraction	BP	0.00965625	2.27435
component_2	Kidney	GO:0043225	ATPase-coupled inorganic anion transmembrane transporter activity	MF	0.00635234	2.23204
component_2	Kidney	GO:0097035	regulation of membrane lipid distribution	BP	0.00610275	2.22591
component_2	Kidney	GO:0051963	regulation of synapse assembly	BP	1.36152e-05	2.19706
component_2	Kidney	GO:0098936	intrinsic component of postsynaptic membrane	CC	0.00695684	2.17185
component_2	Kidney	GO:1901890	positive regulation of cell junction assembly	BP	9.10904e-06	2.16779
component_2	Kidney	GO:0060412	ventricular septum morphogenesis	BP	0.0053976	2.10835
component_2	Kidney	GO:0099699	integral component of synaptic membrane	CC	0.00873751	2.09971
component_2	Kidney	GO:0046488	phosphatidylinositol metabolic process	BP	1.05344e-05	2.08464
component_2	Kidney	GO:0043534	blood vessel endothelial cell migration	BP	0.00636156	2.07067
component_2	Kidney	GO:0006661	phosphatidylinositol biosynthetic process	BP	0.000274898	2.01364
component_2	Kidney	GO:0000123	histone acetyltransferase complex	CC	0.00691137	2.01358
component_2	Kidney	GO:0016342	catenin complex	CC	0.00129189	1.98237
component_2	Kidney	GO:0043542	endothelial cell migration	BP	0.00334058	1.97465
component_2	Kidney	GO:0008013	beta-catenin binding	MF	0.00228707	1.96068
component_2	Kidney	GO:0009582	detection of abiotic stimulus	BP	0.00205973	1.95853
component_2	Kidney	GO:0019208	phosphatase regulator activity	MF	0.00454073	1.94814
component_2	Kidney	GO:0032993	protein-DNA complex	CC	0.00726958	1.94296
component_2	Kidney	GO:0006643	membrane lipid metabolic process	BP	0.000544156	1.92257
component_2	Kidney	GO:0030427	site of polarized growth	CC	0.00372034	1.88736
component_2	Kidney	GO:0030426	growth cone	CC	0.00372034	1.88736
component_2	Kidney	GO:1902493	acetyltransferase complex	CC	0.00538098	1.88502
component_2	Kidney	GO:0031248	protein acetyltransferase complex	CC	0.00538098	1.88502
component_2	Kidney	GO:0043543	protein acylation	BP	0.00252125	1.88283
component_2	Kidney	GO:0006282	regulation of DNA repair	BP	0.00965625	1.88036
component_2	Kidney	GO:0006473	protein acetylation	BP	0.00654753	1.85087
component_2	Kidney	GO:1901888	regulation of cell junction assembly	BP	4.5708e-06	1.84465
component_2	Kidney	GO:0050807	regulation of synapse organization	BP	2.18878e-05	1.8446
component_2	Kidney	GO:0046474	glycerophospholipid biosynthetic process	BP	0.000130905	1.83989
component_2	Kidney	GO:0043484	regulation of RNA splicing	BP	0.00696215	1.83791
component_2	Kidney	GO:0042826	histone deacetylase binding	MF	0.00318373	1.82858
component_2	Kidney	GO:0045017	glycerolipid biosynthetic process	BP	0.000117166	1.82743
component_2	Kidney	GO:0010631	epithelial cell migration	BP	0.0046804	1.82734
component_2	Kidney	GO:0007420	brain development	BP	0.00123629	1.80451
component_2	Kidney	GO:0005516	calmodulin binding	MF	0.0053537	1.77652
component_2	Kidney	GO:1901653	cellular response to peptide	BP	0.000767689	1.77274
component_2	Kidney	GO:0019902	phosphatase binding	MF	0.00223813	1.77038
component_2	Kidney	GO:0070382	exocytic vesicle	CC	0.00921299	1.7696
component_2	Kidney	GO:0051966	regulation of synaptic transmission, glutamatergic	BP	0.00822387	1.76793
component_2	Kidney	GO:0000904	cell morphogenesis involved in differentiation	BP	0.00212329	1.75734
component_2	Kidney	GO:0007399	nervous system development	BP	9.23213e-07	1.75496
component_2	Kidney	GO:0008081	phosphoric diester hydrolase activity	MF	0.00761695	1.73845
component_2	Kidney	GO:0051962	positive regulation of nervous system development	BP	0.000327859	1.71274
component_2	Kidney	GO:0090257	regulation of muscle system process	BP	0.00323808	1.69926
component_2	Kidney	GO:0007156	homophilic cell adhesion via plasma membrane adhesion molecules	BP	0.00209506	1.69579
component_2	Kidney	GO:0008654	phospholipid biosynthetic process	BP	0.00139266	1.69488
component_2	Kidney	GO:0031984	organelle subcompartment	CC	0.000139875	1.68789
component_2	Kidney	GO:0006396	RNA processing	BP	1.86042e-05	1.68448
component_2	Kidney	GO:0000902	cell morphogenesis	BP	0.000867755	1.67203
component_2	Kidney	GO:0006650	glycerophospholipid metabolic process	BP	0.000205725	1.66911
component_2	Kidney	GO:0045211	postsynaptic membrane	CC	0.00969007	1.65887
component_2	Kidney	GO:0010975	regulation of neuron projection development	BP	4.62143e-06	1.65847
component_2	Kidney	GO:0006351	transcription, DNA-templated	BP	0.0026664	1.65275
component_2	Kidney	GO:0097659	nucleic acid-templated transcription	BP	0.0026664	1.65275
component_2	Kidney	GO:0000209	protein polyubiquitination	BP	0.00696215	1.64645
component_2	Kidney	GO:0050808	synapse organization	BP	0.000707787	1.64586
component_2	Kidney	GO:0098791	Golgi apparatus subcompartment	CC	0.000834077	1.64576
component_2	Kidney	GO:0035091	phosphatidylinositol binding	MF	0.00454073	1.63876
component_2	Kidney	GO:0030133	transport vesicle	CC	0.00431914	1.63568
component_2	Kidney	GO:0097485	neuron projection guidance	BP	7.58724e-05	1.62394
component_2	Kidney	GO:0007411	axon guidance	BP	7.58724e-05	1.62394
component_2	Kidney	GO:0016607	nuclear speck	CC	0.000298095	1.6228
component_2	Kidney	GO:0098742	cell-cell adhesion via plasma-membrane adhesion molecules	BP	4.0212e-06	1.62176
component_2	Kidney	GO:0005802	trans-Golgi network	CC	0.00262634	1.62104
component_2	Kidney	GO:0032774	RNA biosynthetic process	BP	0.00143803	1.61659
component_2	Kidney	GO:0031346	positive regulation of cell projection organization	BP	0.000437375	1.60873
component_2	Kidney	GO:0005667	transcription regulator complex	CC	0.000105406	1.58967
component_2	Kidney	GO:0016604	nuclear body	CC	2.71242e-07	1.58897
component_2	Kidney	GO:0032990	cell part morphogenesis	BP	0.00565437	1.58516
component_2	Kidney	GO:0032989	cellular component morphogenesis	BP	0.00565437	1.58516
component_2	Kidney	GO:0019838	growth factor binding	MF	0.000920931	1.58101
component_2	Kidney	GO:0031344	regulation of cell projection organization	BP	4.77072e-07	1.57741
component_2	Kidney	GO:0016757	glycosyltransferase activity	MF	0.00858857	1.57461
component_2	Kidney	GO:0099537	trans-synaptic signaling	BP	9.2728e-05	1.56811
component_2	Kidney	GO:0099536	synaptic signaling	BP	9.2728e-05	1.56811
component_2	Kidney	GO:0090407	organophosphate biosynthetic process	BP	0.000434429	1.56751
component_2	Kidney	GO:0120035	regulation of plasma membrane bounded cell projection organization	BP	1.0215e-06	1.56593
component_2	Kidney	GO:0031589	cell-substrate adhesion	BP	0.00468722	1.56083
component_2	Kidney	GO:0034660	ncRNA metabolic process	BP	0.00317193	1.55997
component_2	Kidney	GO:0034329	cell junction assembly	BP	0.000330151	1.55658
component_2	Kidney	GO:0140513	nuclear protein-containing complex	CC	5.45941e-09	1.55309
component_2	Kidney	GO:0016570	histone modification	BP	0.00709339	1.55103
component_2	Kidney	GO:0001525	angiogenesis	BP	0.00421414	1.54847
component_2	Kidney	GO:0007268	chemical synaptic transmission	BP	0.000442275	1.54512
component_2	Kidney	GO:0098916	anterograde trans-synaptic signaling	BP	0.000442275	1.54512
component_2	Kidney	GO:0006644	phospholipid metabolic process	BP	0.00309269	1.53998
component_2	Kidney	GO:0003682	chromatin binding	MF	0.00619842	1.52962
component_2	Kidney	GO:0048731	system development	BP	4.31422e-08	1.5291
component_2	Kidney	GO:0016070	RNA metabolic process	BP	6.36496e-07	1.5211
component_2	Kidney	GO:0007275	multicellular organism development	BP	0.00167718	1.51823
component_2	Kidney	GO:0034330	cell junction organization	BP	7.58724e-05	1.50373
component_2	Kidney	GO:0051960	regulation of nervous system development	BP	0.00160193	1.50268
component_2	Kidney	GO:0030425	dendrite	CC	0.00137833	1.49963
component_2	Kidney	GO:0009653	anatomical structure morphogenesis	BP	8.71543e-12	1.49839
component_2	Kidney	GO:0050839	cell adhesion molecule binding	MF	9.92503e-08	1.48601
component_2	Kidney	GO:0034654	nucleobase-containing compound biosynthetic process	BP	0.00141133	1.48079
component_2	Kidney	GO:0046486	glycerolipid metabolic process	BP	0.00561321	1.47913
component_2	Kidney	GO:0030424	axon	CC	0.00189106	1.47598
component_2	Kidney	GO:0016773	phosphotransferase activity, alcohol group as acceptor	MF	9.97065e-06	1.46899
component_2	Kidney	GO:1901699	cellular response to nitrogen compound	BP	0.00626527	1.46316
component_2	Kidney	GO:0004674	protein serine/threonine kinase activity	MF	0.00858857	1.45927
component_2	Kidney	GO:0016310	phosphorylation	BP	2.50188e-05	1.45779
component_2	Kidney	GO:0006468	protein phosphorylation	BP	8.70716e-05	1.45754
component_2	Kidney	GO:0016301	kinase activity	MF	7.5524e-06	1.45543
component_2	Kidney	GO:0032409	regulation of transporter activity	BP	0.00561321	1.4542
component_2	Kidney	GO:0090304	nucleic acid metabolic process	BP	1.78307e-07	1.45314
component_2	Kidney	GO:0018193	peptidyl-amino acid modification	BP	5.49658e-05	1.45162
component_2	Kidney	GO:0080135	regulation of cellular response to stress	BP	0.000221056	1.44981
component_2	Kidney	GO:0004672	protein kinase activity	MF	0.000318343	1.43411
component_2	Kidney	GO:0016772	transferase activity, transferring phosphorus-containing groups	MF	7.95412e-06	1.43365
component_2	Kidney	GO:0022836	gated channel activity	MF	0.00761695	1.43293
component_2	Kidney	GO:0098857	membrane microdomain	CC	0.00421639	1.42832
component_2	Kidney	GO:0045121	membrane raft	CC	0.00421639	1.42832
component_2	Kidney	GO:0044089	positive regulation of cellular component biogenesis	BP	0.00123719	1.42775
component_2	Kidney	GO:0043412	macromolecule modification	BP	1.92227e-14	1.427
component_2	Kidney	GO:0048513	animal organ development	BP	4.98098e-06	1.42626
component_2	Kidney	GO:0060589	nucleoside-triphosphatase regulator activity	MF	0.00635234	1.42527
component_2	Kidney	GO:0030695	GTPase regulator activity	MF	0.00635234	1.42527
component_2	Kidney	GO:0045202	synapse	CC	0.00064413	1.42366
component_2	Kidney	GO:0098609	cell-cell adhesion	BP	7.40136e-06	1.42345
component_2	Kidney	GO:0042391	regulation of membrane potential	BP	0.00185812	1.41633
component_2	Kidney	GO:0005730	nucleolus	CC	7.23429e-05	1.41288
component_2	Kidney	GO:0006464	cellular protein modification process	BP	1.19999e-12	1.41226
component_2	Kidney	GO:0036211	protein modification process	BP	1.19999e-12	1.41226
component_2	Kidney	GO:0034765	regulation of ion transmembrane transport	BP	0.0053976	1.41143
component_2	Kidney	GO:0005911	cell-cell junction	CC	0.000408491	1.40866
component_2	Kidney	GO:0034762	regulation of transmembrane transport	BP	0.00203112	1.40369
component_2	Kidney	GO:0043235	receptor complex	CC	8.00399e-05	1.39987
component_2	Kidney	GO:0140535	intracellular protein-containing complex	CC	0.00362415	1.39974
component_2	Kidney	GO:0045944	positive regulation of transcription by RNA polymerase II	BP	8.16114e-06	1.39699
component_2	Kidney	GO:0000122	negative regulation of transcription by RNA polymerase II	BP	0.000137963	1.39494
component_2	Kidney	GO:0030054	cell junction	CC	3.12921e-10	1.39471
component_2	Kidney	GO:0006796	phosphate-containing compound metabolic process	BP	5.89744e-08	1.3909
component_2	Kidney	GO:1990234	transferase complex	CC	0.00469929	1.38573
component_2	Kidney	GO:0006793	phosphorus metabolic process	BP	7.53387e-08	1.38457
component_2	Kidney	GO:0043005	neuron projection	CC	1.30397e-05	1.38041
component_2	Kidney	GO:0005813	centrosome	CC	0.00798788	1.379
component_2	Kidney	GO:0019904	protein domain specific binding	MF	0.00858857	1.37563
component_2	Kidney	GO:0070647	protein modification by small protein conjugation or removal	BP	0.00940478	1.37552
component_2	Kidney	GO:0070161	anchoring junction	CC	2.55154e-06	1.37489
component_2	Kidney	GO:0048856	anatomical structure development	BP	3.7297e-13	1.3704
component_2	Kidney	GO:0045597	positive regulation of cell differentiation	BP	0.000271786	1.36659
component_2	Kidney	GO:0051254	positive regulation of RNA metabolic process	BP	1.90928e-07	1.36606
component_2	Kidney	GO:0045893	positive regulation of transcription, DNA-templated	BP	8.86973e-07	1.36125
component_2	Kidney	GO:1903508	positive regulation of nucleic acid-templated transcription	BP	8.86973e-07	1.36125
component_2	Kidney	GO:1902680	positive regulation of RNA biosynthetic process	BP	8.86973e-07	1.36125
component_2	Kidney	GO:0048646	anatomical structure formation involved in morphogenesis	BP	0.00339491	1.36105
component_2	Kidney	GO:0098797	plasma membrane protein complex	CC	9.15169e-05	1.35892
component_2	Kidney	GO:0045595	regulation of cell differentiation	BP	4.34696e-07	1.35414
component_2	Kidney	GO:0051128	regulation of cellular component organization	BP	3.67806e-11	1.35329
component_2	Kidney	GO:0006139	nucleobase-containing compound metabolic process	BP	3.47296e-06	1.35318
component_2	Kidney	GO:0044267	cellular protein metabolic process	BP	4.50348e-10	1.34699
component_2	Kidney	GO:0046483	heterocycle metabolic process	BP	4.72529e-07	1.34667
component_2	Kidney	GO:0032502	developmental process	BP	1.15102e-20	1.34291
component_2	Kidney	GO:0016740	transferase activity	MF	1.23854e-08	1.34228
component_2	Kidney	GO:0005925	focal adhesion	CC	0.00450275	1.34069
component_2	Kidney	GO:0030055	cell-substrate junction	CC	0.00404057	1.33881
component_2	Kidney	GO:0010557	positive regulation of macromolecule biosynthetic process	BP	7.10152e-07	1.3363
component_2	Kidney	GO:0045935	positive regulation of nucleobase-containing compound metabolic process	BP	3.4273e-07	1.33445
component_2	Kidney	GO:0140110	transcription regulator activity	MF	2.06839e-07	1.33216
component_2	Kidney	GO:0000981	DNA-binding transcription factor activity, RNA polymerase II-specific	MF	2.36351e-05	1.3317
component_2	Kidney	GO:0045934	negative regulation of nucleobase-containing compound metabolic process	BP	4.97783e-05	1.33018
component_2	Kidney	GO:0003700	DNA-binding transcription factor activity	MF	1.72726e-05	1.32559
component_2	Kidney	GO:0006357	regulation of transcription by RNA polymerase II	BP	7.22543e-10	1.32379
component_2	Kidney	GO:0005794	Golgi apparatus	CC	0.000557265	1.32158
component_2	Kidney	GO:0051130	positive regulation of cellular component organization	BP	0.000282927	1.31966
component_2	Kidney	GO:0023052	signaling	BP	0.00162627	1.31441
component_2	Kidney	GO:0009891	positive regulation of biosynthetic process	BP	1.77231e-06	1.31251
component_2	Kidney	GO:0000987	cis-regulatory region sequence-specific DNA binding	MF	0.000183528	1.31211
component_2	Kidney	GO:0048869	cellular developmental process	BP	3.8774e-08	1.31137
component_2	Kidney	GO:0000978	RNA polymerase II cis-regulatory region sequence-specific DNA binding	MF	0.000257455	1.31112
component_2	Kidney	GO:0140096	catalytic activity, acting on a protein	MF	7.92657e-08	1.30934
component_2	Kidney	GO:0044087	regulation of cellular component biogenesis	BP	0.00131656	1.3093
component_2	Kidney	GO:0051094	positive regulation of developmental process	BP	9.27833e-05	1.30762
component_2	Kidney	GO:1903507	negative regulation of nucleic acid-templated transcription	BP	0.000673439	1.307
component_2	Kidney	GO:0045892	negative regulation of transcription, DNA-templated	BP	0.000673439	1.307
component_2	Kidney	GO:0044260	cellular macromolecule metabolic process	BP	4.66904e-11	1.30628
component_2	Kidney	GO:1901360	organic cyclic compound metabolic process	BP	2.49104e-06	1.30554
component_2	Kidney	GO:0005654	nucleoplasm	CC	1.46985e-11	1.30463
component_2	Kidney	GO:0022610	biological adhesion	BP	8.07243e-05	1.30349
component_2	Kidney	GO:0007155	cell adhesion	BP	8.07243e-05	1.30349
component_2	Kidney	GO:0030154	cell differentiation	BP	3.48959e-05	1.30288
component_2	Kidney	GO:0003690	double-stranded DNA binding	MF	1.09977e-05	1.30242
component_2	Kidney	GO:1902494	catalytic complex	CC	0.000791392	1.30184
component_2	Kidney	GO:0000976	transcription cis-regulatory region binding	MF	3.15092e-05	1.30169
component_2	Kidney	GO:0001067	transcription regulatory region nucleic acid binding	MF	3.15092e-05	1.30169
component_2	Kidney	GO:0010558	negative regulation of macromolecule biosynthetic process	BP	0.000298813	1.3011
component_2	Kidney	GO:0031328	positive regulation of cellular biosynthetic process	BP	7.22999e-06	1.30097
component_2	Kidney	GO:0000977	RNA polymerase II transcription regulatory region sequence-specific DNA binding	MF	8.44856e-05	1.30059
component_2	Kidney	GO:0051129	negative regulation of cellular component organization	BP	0.00962103	1.30056
component_2	Kidney	GO:1902679	negative regulation of RNA biosynthetic process	BP	0.00105795	1.29938
component_2	Kidney	GO:0051253	negative regulation of RNA metabolic process	BP	0.000657347	1.29915
component_2	Kidney	GO:0043170	macromolecule metabolic process	BP	1.61718e-14	1.2984
component_2	Kidney	GO:0098796	membrane protein complex	CC	7.12977e-05	1.29558
component_2	Kidney	GO:0006807	nitrogen compound metabolic process	BP	2.3203e-16	1.29477
component_2	Kidney	GO:0019538	protein metabolic process	BP	1.03518e-09	1.29393
component_2	Kidney	GO:0051252	regulation of RNA metabolic process	BP	4.66783e-12	1.29361
component_2	Kidney	GO:0035556	intracellular signal transduction	BP	0.000211364	1.29025
component_2	Kidney	GO:0006725	cellular aromatic compound metabolic process	BP	4.87192e-05	1.29002
component_2	Kidney	GO:0031327	negative regulation of cellular biosynthetic process	BP	0.000451507	1.28899
component_2	Kidney	GO:1990837	sequence-specific double-stranded DNA binding	MF	5.8036e-05	1.28839
component_2	Kidney	GO:0009890	negative regulation of biosynthetic process	BP	0.000395227	1.28744
component_2	Kidney	GO:0019219	regulation of nucleobase-containing compound metabolic process	BP	3.95654e-12	1.28641
component_2	Kidney	GO:0044238	primary metabolic process	BP	2.46704e-16	1.28334
component_2	Kidney	GO:0120025	plasma membrane bounded cell projection	CC	0.000123114	1.28073
component_2	Kidney	GO:0043565	sequence-specific DNA binding	MF	8.44856e-05	1.27769
component_2	Kidney	GO:2000026	regulation of multicellular organismal development	BP	0.000356138	1.27757
component_2	Kidney	GO:1903506	regulation of nucleic acid-templated transcription	BP	1.25696e-09	1.27262
component_2	Kidney	GO:0006355	regulation of transcription, DNA-templated	BP	1.25696e-09	1.27262
component_2	Kidney	GO:0003677	DNA binding	MF	1.16616e-05	1.27197
component_2	Kidney	GO:0003676	nucleic acid binding	MF	2.95416e-08	1.27069
component_2	Kidney	GO:2001141	regulation of RNA biosynthetic process	BP	1.61649e-09	1.27009
component_2	Kidney	GO:0010556	regulation of macromolecule biosynthetic process	BP	1.83228e-10	1.26914
component_2	Kidney	GO:0051172	negative regulation of nitrogen compound metabolic process	BP	2.00354e-05	1.26066
component_2	Kidney	GO:0007154	cell communication	BP	0.00803941	1.2583
component_2	Kidney	GO:0009889	regulation of biosynthetic process	BP	4.36554e-10	1.25712
component_2	Kidney	GO:0097708	intracellular vesicle	CC	0.00103957	1.25404
component_2	Kidney	GO:0050793	regulation of developmental process	BP	3.26352e-06	1.25404
component_2	Kidney	GO:0042995	cell projection	CC	0.00054574	1.25282
component_2	Kidney	GO:0031326	regulation of cellular biosynthetic process	BP	1.30132e-09	1.25242
component_2	Kidney	GO:1901564	organonitrogen compound metabolic process	BP	1.39394e-09	1.2499
component_2	Kidney	GO:0034641	cellular nitrogen compound metabolic process	BP	0.000154923	1.24618
component_2	Kidney	GO:0031324	negative regulation of cellular metabolic process	BP	3.3387e-05	1.24613
component_2	Kidney	GO:0031325	positive regulation of cellular metabolic process	BP	4.05577e-07	1.23974
component_2	Kidney	GO:0031410	cytoplasmic vesicle	CC	0.00219253	1.23892
component_2	Kidney	GO:0043232	intracellular non-membrane-bounded organelle	CC	1.12987e-05	1.23852
component_2	Kidney	GO:0043228	non-membrane-bounded organelle	CC	1.12987e-05	1.23852
component_2	Kidney	GO:0043229	intracellular organelle	CC	3.30331e-26	1.23806
component_2	Kidney	GO:0051641	cellular localization	BP	0.00148802	1.23786
component_2	Kidney	GO:0071704	organic substance metabolic process	BP	2.2617e-13	1.2367
component_2	Kidney	GO:0032991	protein-containing complex	CC	3.79197e-12	1.23632
component_2	Kidney	GO:0030234	enzyme regulator activity	MF	0.00858857	1.23507
component_2	Kidney	GO:0043231	intracellular membrane-bounded organelle	CC	5.95404e-21	1.23193
component_2	Kidney	GO:0044237	cellular metabolic process	BP	5.00601e-12	1.23036
component_2	Kidney	GO:0051173	positive regulation of nitrogen compound metabolic process	BP	3.00218e-06	1.22978
component_2	Kidney	GO:0032501	multicellular organismal process	BP	3.70519e-05	1.22971
component_2	Kidney	GO:1901363	heterocyclic compound binding	MF	3.6366e-07	1.22245
component_2	Kidney	GO:0005634	nucleus	CC	1.3577e-09	1.22223
component_2	Kidney	GO:0051171	regulation of nitrogen compound metabolic process	BP	4.66904e-11	1.22099
component_2	Kidney	GO:0006996	organelle organization	BP	0.00185171	1.22025
component_2	Kidney	GO:0005737	cytoplasm	CC	6.28498e-09	1.21928
component_2	Kidney	GO:0005887	integral component of plasma membrane	CC	0.000236906	1.21831
component_2	Kidney	GO:0098590	plasma membrane region	CC	0.00761873	1.2164
component_2	Kidney	GO:0031226	intrinsic component of plasma membrane	CC	0.000168729	1.21364
component_2	Kidney	GO:0080090	regulation of primary metabolic process	BP	1.83228e-10	1.21168
component_2	Kidney	GO:0097159	organic cyclic compound binding	MF	1.38061e-06	1.21018
component_2	Kidney	GO:0010605	negative regulation of macromolecule metabolic process	BP	0.000286027	1.20874
component_2	Kidney	GO:0031323	regulation of cellular metabolic process	BP	1.83228e-10	1.20756
component_2	Kidney	GO:0008152	metabolic process	BP	2.5251e-11	1.20732
component_2	Kidney	GO:0098588	bounding membrane of organelle	CC	0.00190699	1.20674
component_2	Kidney	GO:0016043	cellular component organization	BP	5.06553e-08	1.20596
component_2	Kidney	GO:0071840	cellular component organization or biogenesis	BP	6.44357e-08	1.2033
component_2	Kidney	GO:0016787	hydrolase activity	MF	0.00454073	1.19796
component_2	Kidney	GO:0003824	catalytic activity	MF	6.35655e-08	1.19612
component_2	Kidney	GO:0009892	negative regulation of metabolic process	BP	0.000423971	1.19535
component_2	Kidney	GO:0010468	regulation of gene expression	BP	2.00017e-07	1.19523
component_2	Kidney	GO:0010604	positive regulation of macromolecule metabolic process	BP	1.80944e-05	1.19519
component_2	Kidney	GO:0022607	cellular component assembly	BP	0.00927121	1.1902
component_2	Kidney	GO:0051179	localization	BP	4.08242e-06	1.18819
component_2	Kidney	GO:0016020	membrane	CC	7.71741e-15	1.18652
component_2	Kidney	GO:0005886	plasma membrane	CC	2.63694e-09	1.18321
component_2	Kidney	GO:0019899	enzyme binding	MF	0.00800172	1.18237
component_2	Kidney	GO:0048522	positive regulation of cellular process	BP	2.5506e-08	1.18183
component_2	Kidney	GO:0048523	negative regulation of cellular process	BP	1.09842e-06	1.18078
component_2	Kidney	GO:0005829	cytosol	CC	5.89752e-07	1.17786
component_2	Kidney	GO:0032879	regulation of localization	BP	0.000455614	1.17602
component_2	Kidney	GO:0009987	cellular process	BP	3.16242e-28	1.17545
component_2	Kidney	GO:0060255	regulation of macromolecule metabolic process	BP	5.01403e-08	1.17441
component_2	Kidney	GO:0009893	positive regulation of metabolic process	BP	7.10574e-05	1.17333
component_2	Kidney	GO:0043226	organelle	CC	6.58074e-18	1.1711
component_2	Kidney	GO:0008150	biological_process	BP	1.12587e-39	1.17048
component_2	Kidney	GO:0023051	regulation of signaling	BP	0.00019087	1.1702
component_2	Kidney	GO:0110165	cellular anatomical entity	CC	1.13768e-44	1.16861
component_2	Kidney	GO:0010646	regulation of cell communication	BP	0.000242792	1.16813
component_2	Kidney	GO:0005575	cellular_component	CC	1.13768e-44	1.16723
component_2	Kidney	GO:0043227	membrane-bounded organelle	CC	5.89446e-14	1.16173
component_2	Kidney	GO:0006810	transport	BP	0.00104	1.16012
component_2	Kidney	GO:0003674	molecular_function	MF	4.92808e-39	1.1595
component_2	Kidney	GO:0019222	regulation of metabolic process	BP	2.12918e-07	1.15862
component_2	Kidney	GO:0050794	regulation of cellular process	BP	5.028e-15	1.15814
component_2	Kidney	GO:0005515	protein binding	MF	8.77798e-25	1.15652
component_2	Kidney	GO:0051234	establishment of localization	BP	0.00108696	1.15649
component_2	Kidney	GO:0005488	binding	MF	4.82305e-27	1.15075
component_2	Kidney	GO:0016021	integral component of membrane	CC	0.00482241	1.15011
component_2	Kidney	GO:0009966	regulation of signal transduction	BP	0.00429323	1.14934
component_2	Kidney	GO:0050789	regulation of biological process	BP	2.76294e-14	1.14766
component_2	Kidney	GO:0031224	intrinsic component of membrane	CC	0.00439347	1.14591
component_2	Kidney	GO:0065007	biological regulation	BP	5.028e-15	1.14411
component_2	Kidney	GO:0048519	negative regulation of biological process	BP	9.2728e-05	1.14393
component_2	Kidney	GO:0048518	positive regulation of biological process	BP	5.87578e-06	1.14248
component_3	Kidney	GO:0042219	cellular modified amino acid catabolic process	BP	0.00666291	2.80638
component_3	Kidney	GO:0008272	sulfate transport	BP	0.00886736	2.71773
component_3	Kidney	GO:0035909	aorta morphogenesis	BP	0.00248021	2.71007
component_3	Kidney	GO:0015116	sulfate transmembrane transporter activity	MF	0.00298047	2.69577
component_3	Kidney	GO:0015108	chloride transmembrane transporter activity	MF	0.00103897	2.66096
component_3	Kidney	GO:0043225	ATPase-coupled inorganic anion transmembrane transporter activity	MF	0.00014494	2.57031
component_3	Kidney	GO:0035633	maintenance of blood-brain barrier	BP	0.000437373	2.55196
component_3	Kidney	GO:0097009	energy homeostasis	BP	0.00194492	2.49321
component_3	Kidney	GO:0038084	vascular endothelial growth factor signaling pathway	BP	0.00696754	2.45896
component_3	Kidney	GO:0048813	dendrite morphogenesis	BP	0.00714085	2.45305
component_3	Kidney	GO:0045444	fat cell differentiation	BP	0.0012747	2.40804
component_3	Kidney	GO:0045332	phospholipid translocation	BP	0.00403363	2.40046
component_3	Kidney	GO:0034204	lipid translocation	BP	0.00403363	2.40046
component_3	Kidney	GO:0010676	positive regulation of cellular carbohydrate metabolic process	BP	0.00414909	2.3911
component_3	Kidney	GO:0002042	cell migration involved in sprouting angiogenesis	BP	0.00138525	2.38495
component_3	Kidney	GO:0015106	bicarbonate transmembrane transporter activity	MF	0.000653416	2.35635
component_3	Kidney	GO:0043534	blood vessel endothelial cell migration	BP	0.000198492	2.34723
component_3	Kidney	GO:0072073	kidney epithelium development	BP	0.00485693	2.34648
component_3	Kidney	GO:0006664	glycolipid metabolic process	BP	0.00174336	2.33817
component_3	Kidney	GO:1903509	liposaccharide metabolic process	BP	0.000604979	2.33781
component_3	Kidney	GO:0005669	transcription factor TFIID complex	CC	0.00763288	2.32998
component_3	Kidney	GO:0048675	axon extension	BP	0.0052829	2.32424
component_3	Kidney	GO:0072310	glomerular epithelial cell development	BP	0.00563722	2.30458
component_3	Kidney	GO:0072015	glomerular visceral epithelial cell development	BP	0.00563722	2.30458
component_3	Kidney	GO:0036057	slit diaphragm	CC	0.0081444	2.30112
component_3	Kidney	GO:0036056	filtration diaphragm	CC	0.0081444	2.30112
component_3	Kidney	GO:0001763	morphogenesis of a branching structure	BP	0.00230541	2.28677
component_3	Kidney	GO:0005310	dicarboxylic acid transmembrane transporter activity	MF	0.00579898	2.28525
component_3	Kidney	GO:1901682	sulfur compound transmembrane transporter activity	MF	0.00156151	2.26729
component_3	Kidney	GO:0097035	regulation of membrane lipid distribution	BP	0.00392	2.24285
component_3	Kidney	GO:0031532	actin cytoskeleton reorganization	BP	0.00392	2.24197
component_3	Kidney	GO:0072348	sulfur compound transport	BP	0.00403363	2.23061
component_3	Kidney	GO:0061138	morphogenesis of a branching epithelium	BP	0.0079515	2.22814
component_3	Kidney	GO:0048754	branching morphogenesis of an epithelial tube	BP	0.0079515	2.22814
component_3	Kidney	GO:0050431	transforming growth factor beta binding	MF	0.00213983	2.19499
component_3	Kidney	GO:0043542	endothelial cell migration	BP	0.000131348	2.18864
component_3	Kidney	GO:1902414	protein localization to cell junction	BP	0.00185685	2.18691
component_3	Kidney	GO:0048844	artery morphogenesis	BP	0.00205737	2.1695
component_3	Kidney	GO:0001822	kidney development	BP	0.000238741	2.15869
component_3	Kidney	GO:0048514	blood vessel morphogenesis	BP	4.03367e-05	2.13581
component_3	Kidney	GO:0060412	ventricular septum morphogenesis	BP	0.00339416	2.12439
component_3	Kidney	GO:0004112	cyclic-nucleotide phosphodiesterase activity	MF	0.0060023	2.12065
component_3	Kidney	GO:0030169	low-density lipoprotein particle binding	MF	0.00602211	2.11672
component_3	Kidney	GO:0043467	regulation of generation of precursor metabolites and energy	BP	0.00347681	2.11614
component_3	Kidney	GO:0019208	phosphatase regulator activity	MF	0.000389712	2.10659
component_3	Kidney	GO:0046488	phosphatidylinositol metabolic process	BP	5.59913e-06	2.1005
component_3	Kidney	GO:0098960	postsynaptic neurotransmitter receptor activity	MF	0.00878664	2.1004
component_3	Kidney	GO:0019888	protein phosphatase regulator activity	MF	0.00112614	2.08616
component_3	Kidney	GO:1990138	neuron projection extension	BP	0.00403363	2.0831
component_3	Kidney	GO:0060560	developmental growth involved in morphogenesis	BP	0.00403363	2.0831
component_3	Kidney	GO:0071813	lipoprotein particle binding	MF	0.00417542	2.0831
component_3	Kidney	GO:0071814	protein-lipid complex binding	MF	0.00417542	2.0831
component_3	Kidney	GO:0006661	phosphatidylinositol biosynthetic process	BP	0.000159669	2.02896
component_3	Kidney	GO:0000123	histone acetyltransferase complex	CC	0.00624654	2.0289
component_3	Kidney	GO:0016049	cell growth	BP	0.00336286	2.00497
component_3	Kidney	GO:0048588	developmental cell growth	BP	0.00336286	2.00497
component_3	Kidney	GO:0051491	positive regulation of filopodium assembly	BP	0.0078406	2.00456
component_3	Kidney	GO:0016342	catenin complex	CC	0.000969154	1.99745
component_3	Kidney	GO:0010631	epithelial cell migration	BP	0.000286238	1.99468
component_3	Kidney	GO:0008013	beta-catenin binding	MF	0.00157329	1.9756
component_3	Kidney	GO:0005548	phospholipid transporter activity	MF	0.00520253	1.97429
component_3	Kidney	GO:0001764	neuron migration	BP	0.00917796	1.96835
component_3	Kidney	GO:0051865	protein autoubiquitination	BP	0.00948166	1.96068
component_3	Kidney	GO:0032993	protein-DNA complex	CC	0.00495761	1.95774
component_3	Kidney	GO:0046474	glycerophospholipid biosynthetic process	BP	7.2482e-06	1.95688
component_3	Kidney	GO:0008238	exopeptidase activity	MF	0.00386708	1.94516
component_3	Kidney	GO:0045017	glycerolipid biosynthetic process	BP	5.09011e-06	1.93824
component_3	Kidney	GO:0034446	substrate adhesion-dependent cell spreading	BP	0.00164027	1.93728
component_3	Kidney	GO:0010883	regulation of lipid storage	BP	0.00246578	1.91827
component_3	Kidney	GO:0007156	homophilic cell adhesion via plasma membrane adhesion molecules	BP	1.50938e-05	1.90971
component_3	Kidney	GO:0046467	membrane lipid biosynthetic process	BP	0.00953402	1.90674
component_3	Kidney	GO:1903076	regulation of protein localization to plasma membrane	BP	0.00438235	1.89951
component_3	Kidney	GO:1902493	acetyltransferase complex	CC	0.00495761	1.89936
component_3	Kidney	GO:0031248	protein acetyltransferase complex	CC	0.00495761	1.89936
component_3	Kidney	GO:0008654	phospholipid biosynthetic process	BP	1.0032e-05	1.89752
component_3	Kidney	GO:0007179	transforming growth factor beta receptor signaling pathway	BP	0.00666291	1.89434
component_3	Kidney	GO:1901890	positive regulation of cell junction assembly	BP	0.000754225	1.89304
component_3	Kidney	GO:0000904	cell morphogenesis involved in differentiation	BP	0.000159669	1.88875
component_3	Kidney	GO:0051276	chromosome organization	BP	4.35967e-05	1.88476
component_3	Kidney	GO:0050808	synapse organization	BP	5.73973e-07	1.88453
component_3	Kidney	GO:0030510	regulation of BMP signaling pathway	BP	0.00121663	1.87985
component_3	Kidney	GO:0007416	synapse assembly	BP	0.00181085	1.87647
component_3	Kidney	GO:0008307	structural constituent of muscle	MF	0.00630691	1.86186
component_3	Kidney	GO:0006366	transcription by RNA polymerase II	BP	0.000742911	1.85673
component_3	Kidney	GO:0035239	tube morphogenesis	BP	8.54006e-06	1.84014
component_3	Kidney	GO:0071375	cellular response to peptide hormone stimulus	BP	0.00768113	1.84007
component_3	Kidney	GO:0090575	RNA polymerase II transcription regulator complex	CC	6.16958e-05	1.8364
component_3	Kidney	GO:0048871	multicellular organismal homeostasis	BP	0.000546801	1.82936
component_3	Kidney	GO:0007399	nervous system development	BP	4.54494e-08	1.82535
component_3	Kidney	GO:0070160	tight junction	CC	0.00150549	1.82175
component_3	Kidney	GO:0032432	actin filament bundle	CC	0.0056254	1.82121
component_3	Kidney	GO:0098631	cell adhesion mediator activity	MF	0.00239737	1.81759
component_3	Kidney	GO:0005912	adherens junction	CC	4.34055e-05	1.80768
component_3	Kidney	GO:0010976	positive regulation of neuron projection development	BP	0.00726804	1.8065
component_3	Kidney	GO:0005667	transcription regulator complex	CC	5.92049e-08	1.80199
component_3	Kidney	GO:0019199	transmembrane receptor protein kinase activity	MF	0.000255627	1.80123
component_3	Kidney	GO:0006643	membrane lipid metabolic process	BP	0.00302171	1.79882
component_3	Kidney	GO:0005254	chloride channel activity	MF	0.0070885	1.79352
component_3	Kidney	GO:0050770	regulation of axonogenesis	BP	0.000942264	1.78957
component_3	Kidney	GO:1901653	cellular response to peptide	BP	0.000371562	1.78623
component_3	Kidney	GO:0051966	regulation of synaptic transmission, glutamatergic	BP	0.00511175	1.78138
component_3	Kidney	GO:0060411	cardiac septum morphogenesis	BP	0.00325584	1.78014
component_3	Kidney	GO:0015914	phospholipid transport	BP	0.00832937	1.77722
component_3	Kidney	GO:0098632	cell-cell adhesion mediator activity	MF	0.00769342	1.77511
component_3	Kidney	GO:0009100	glycoprotein metabolic process	BP	0.00258426	1.77238
component_3	Kidney	GO:0007178	transmembrane receptor protein serine/threonine kinase signaling pathway	BP	0.00314509	1.77088
component_3	Kidney	GO:0002064	epithelial cell development	BP	0.00543756	1.77045
component_3	Kidney	GO:0000902	cell morphogenesis	BP	6.06634e-05	1.76899
component_3	Kidney	GO:0030175	filopodium	CC	0.00911195	1.76688
component_3	Kidney	GO:0000209	protein polyubiquitination	BP	0.00055574	1.76266
component_3	Kidney	GO:0005811	lipid droplet	CC	0.00289065	1.76186
component_3	Kidney	GO:0015748	organophosphate ester transport	BP	0.00357662	1.76125
component_3	Kidney	GO:0001667	ameboidal-type cell migration	BP	0.000578257	1.75687
component_3	Kidney	GO:0008081	phosphoric diester hydrolase activity	MF	0.00496674	1.75167
component_3	Kidney	GO:0031346	positive regulation of cell projection organization	BP	5.59913e-06	1.75065
component_3	Kidney	GO:0034330	cell junction organization	BP	4.27772e-10	1.74244
component_3	Kidney	GO:0061695	transferase complex, transferring phosphorus-containing groups	CC	0.00266299	1.73452
component_3	Kidney	GO:0004714	transmembrane receptor protein tyrosine kinase activity	MF	0.00520253	1.73084
component_3	Kidney	GO:0051962	positive regulation of nervous system development	BP	0.000148582	1.72577
component_3	Kidney	GO:0034329	cell junction assembly	BP	5.46415e-07	1.72527
component_3	Kidney	GO:0061629	RNA polymerase II-specific DNA-binding transcription factor binding	MF	3.03201e-05	1.72482
component_3	Kidney	GO:0043434	response to peptide hormone	BP	0.00563722	1.72298
component_3	Kidney	GO:0031589	cell-substrate adhesion	BP	6.06634e-05	1.72249
component_3	Kidney	GO:0019838	growth factor binding	MF	1.2585e-05	1.72048
component_3	Kidney	GO:0010975	regulation of neuron projection development	BP	2.16824e-07	1.72024
component_3	Kidney	GO:0009410	response to xenobiotic stimulus	BP	0.00714761	1.71206
component_3	Kidney	GO:0006351	transcription, DNA-templated	BP	0.000546801	1.71033
component_3	Kidney	GO:0097659	nucleic acid-templated transcription	BP	0.000546801	1.71033
component_3	Kidney	GO:0005975	carbohydrate metabolic process	BP	0.000578257	1.69985
component_3	Kidney	GO:0051056	regulation of small GTPase mediated signal transduction	BP	1.04973e-05	1.69727
component_3	Kidney	GO:0006821	chloride transport	BP	0.00817453	1.69685
component_3	Kidney	GO:0007160	cell-matrix adhesion	BP	0.00535349	1.69576
component_3	Kidney	GO:0090407	organophosphate biosynthetic process	BP	5.59913e-06	1.69225
component_3	Kidney	GO:0015629	actin cytoskeleton	CC	6.39744e-05	1.69134
component_3	Kidney	GO:0032774	RNA biosynthetic process	BP	0.000216389	1.68638
component_3	Kidney	GO:0006650	glycerophospholipid metabolic process	BP	9.41084e-05	1.68181
component_3	Kidney	GO:0032990	cell part morphogenesis	BP	0.000546801	1.68129
component_3	Kidney	GO:0032989	cellular component morphogenesis	BP	0.000546801	1.68129
component_3	Kidney	GO:0006644	phospholipid metabolic process	BP	3.97432e-05	1.68101
component_3	Kidney	GO:0062013	positive regulation of small molecule metabolic process	BP	0.0050083	1.67126
component_3	Kidney	GO:0007043	cell-cell junction assembly	BP	0.0022097	1.66868
component_3	Kidney	GO:0045216	cell-cell junction organization	BP	0.000953756	1.66718
component_3	Kidney	GO:0042393	histone binding	MF	0.0037143	1.66595
component_3	Kidney	GO:1901888	regulation of cell junction assembly	BP	0.000371562	1.66507
component_3	Kidney	GO:0019902	phosphatase binding	MF	0.00726311	1.66492
component_3	Kidney	GO:0045296	cadherin binding	MF	3.08126e-06	1.65314
component_3	Kidney	GO:1990778	protein localization to cell periphery	BP	0.00201907	1.6516
component_3	Kidney	GO:0035091	phosphatidylinositol binding	MF	0.00239737	1.65123
component_3	Kidney	GO:0050769	positive regulation of neurogenesis	BP	0.00714085	1.65012
component_3	Kidney	GO:0030133	transport vesicle	CC	0.00368022	1.64812
component_3	Kidney	GO:0015103	inorganic anion transmembrane transporter activity	MF	0.00213983	1.64336
component_3	Kidney	GO:0005911	cell-cell junction	CC	5.37201e-09	1.63645
component_3	Kidney	GO:0005802	trans-Golgi network	CC	0.00210406	1.63337
component_3	Kidney	GO:0001525	angiogenesis	BP	0.000453006	1.63117
component_3	Kidney	GO:0048812	neuron projection morphogenesis	BP	0.00428653	1.62954
component_3	Kidney	GO:0120039	plasma membrane bounded cell projection morphogenesis	BP	0.00292679	1.62802
component_3	Kidney	GO:0048858	cell projection morphogenesis	BP	0.00292679	1.62802
component_3	Kidney	GO:0032870	cellular response to hormone stimulus	BP	0.000720938	1.62379
component_3	Kidney	GO:0031984	organelle subcompartment	CC	0.000534135	1.62343
component_3	Kidney	GO:0004222	metalloendopeptidase activity	MF	0.00977285	1.60982
component_3	Kidney	GO:0090092	regulation of transmembrane receptor protein serine/threonine kinase signaling pathway	BP	0.000174604	1.60718
component_3	Kidney	GO:0031344	regulation of cell projection organization	BP	6.39681e-08	1.60614
component_3	Kidney	GO:0051604	protein maturation	BP	0.00153466	1.60506
component_3	Kidney	GO:0015698	inorganic anion transport	BP	0.00938125	1.60129
component_3	Kidney	GO:0120035	regulation of plasma membrane bounded cell projection organization	BP	1.47398e-07	1.59481
component_3	Kidney	GO:0046943	carboxylic acid transmembrane transporter activity	MF	0.00520253	1.59277
component_3	Kidney	GO:0005342	organic acid transmembrane transporter activity	MF	0.00520253	1.59277
component_3	Kidney	GO:0090287	regulation of cellular response to growth factor stimulus	BP	0.000137456	1.59117
component_3	Kidney	GO:0008514	organic anion transmembrane transporter activity	MF	0.00394367	1.59084
component_3	Kidney	GO:0050839	cell adhesion molecule binding	MF	3.2332e-11	1.58539
component_3	Kidney	GO:0140513	nuclear protein-containing complex	CC	5.20064e-10	1.58423
component_3	Kidney	GO:0048646	anatomical structure formation involved in morphogenesis	BP	1.08977e-07	1.57633
component_3	Kidney	GO:0034654	nucleobase-containing compound biosynthetic process	BP	4.41627e-05	1.57561
component_3	Kidney	GO:0098791	Golgi apparatus subcompartment	CC	0.00395432	1.571
component_3	Kidney	GO:0051960	regulation of nervous system development	BP	0.000159669	1.56632
component_3	Kidney	GO:0016607	nuclear speck	CC	0.000975445	1.56405
component_3	Kidney	GO:0046982	protein heterodimerization activity	MF	0.00520253	1.5611
component_3	Kidney	GO:0010720	positive regulation of cell development	BP	0.00551684	1.56
component_3	Kidney	GO:0003712	transcription coregulator activity	MF	0.000224042	1.55974
component_3	Kidney	GO:0060589	nucleoside-triphosphatase regulator activity	MF	0.000107352	1.55382
component_3	Kidney	GO:0030695	GTPase regulator activity	MF	0.000107352	1.55382
component_3	Kidney	GO:1901652	response to peptide	BP	0.00328411	1.55377
component_3	Kidney	GO:0010639	negative regulation of organelle organization	BP	0.00123787	1.55266
component_3	Kidney	GO:0098802	plasma membrane signaling receptor complex	CC	0.00060144	1.55254
component_3	Kidney	GO:0008237	metallopeptidase activity	MF	0.00417542	1.54942
component_3	Kidney	GO:0048193	Golgi vesicle transport	BP	0.00716623	1.54833
component_3	Kidney	GO:0046486	glycerolipid metabolic process	BP	0.00061653	1.5477
component_3	Kidney	GO:0098742	cell-cell adhesion via plasma-membrane adhesion molecules	BP	5.09702e-05	1.54577
component_3	Kidney	GO:1990234	transferase complex	CC	3.22657e-05	1.5392
component_3	Kidney	GO:0051015	actin filament binding	MF	0.0060023	1.53639
component_3	Kidney	GO:0006396	RNA processing	BP	0.00123787	1.53494
component_3	Kidney	GO:0005319	lipid transporter activity	MF	0.00520253	1.53378
component_3	Kidney	GO:0071417	cellular response to organonitrogen compound	BP	0.0012747	1.53041
component_3	Kidney	GO:0016604	nuclear body	CC	3.21507e-06	1.5299
component_3	Kidney	GO:0007275	multicellular organism development	BP	0.000897569	1.52978
component_3	Kidney	GO:1901362	organic cyclic compound biosynthetic process	BP	2.29206e-06	1.5288
component_3	Kidney	GO:0008134	transcription factor binding	MF	1.22223e-05	1.52844
component_3	Kidney	GO:0072657	protein localization to membrane	BP	0.00129374	1.52602
component_3	Kidney	GO:0008610	lipid biosynthetic process	BP	2.57481e-05	1.52393
component_3	Kidney	GO:0097485	neuron projection guidance	BP	0.001113	1.52345
component_3	Kidney	GO:0007411	axon guidance	BP	0.001113	1.52345
component_3	Kidney	GO:0018130	heterocycle biosynthetic process	BP	3.16728e-05	1.5231
component_3	Kidney	GO:0140297	DNA-binding transcription factor binding	MF	0.000525618	1.52274
component_3	Kidney	GO:0009653	anatomical structure morphogenesis	BP	5.20347e-13	1.51757
component_3	Kidney	GO:0031253	cell projection membrane	CC	0.000860033	1.51233
component_3	Kidney	GO:0070161	anchoring junction	CC	2.60952e-11	1.51048
component_3	Kidney	GO:0007268	chemical synaptic transmission	BP	0.000907141	1.50498
component_3	Kidney	GO:0098916	anterograde trans-synaptic signaling	BP	0.000907141	1.50498
component_3	Kidney	GO:0048731	system development	BP	1.29545e-07	1.50345
component_3	Kidney	GO:0050767	regulation of neurogenesis	BP	0.00561085	1.50154
component_3	Kidney	GO:0019438	aromatic compound biosynthetic process	BP	6.93027e-05	1.50143
component_3	Kidney	GO:0000122	negative regulation of transcription by RNA polymerase II	BP	2.16824e-07	1.50095
component_3	Kidney	GO:0045944	positive regulation of transcription by RNA polymerase II	BP	6.4786e-09	1.49463
component_3	Kidney	GO:0070647	protein modification by small protein conjugation or removal	BP	0.000108508	1.49411
component_3	Kidney	GO:0098857	membrane microdomain	CC	0.000700355	1.49059
component_3	Kidney	GO:0045121	membrane raft	CC	0.000700355	1.49059
component_3	Kidney	GO:0006820	anion transport	BP	9.4196e-05	1.49013
component_3	Kidney	GO:0022898	regulation of transmembrane transporter activity	BP	0.00302171	1.48829
component_3	Kidney	GO:0030424	axon	CC	0.00120487	1.48721
component_3	Kidney	GO:0005813	centrosome	CC	0.000428514	1.48532
component_3	Kidney	GO:0099537	trans-synaptic signaling	BP	0.000906363	1.48428
component_3	Kidney	GO:0099536	synaptic signaling	BP	0.000906363	1.48428
component_3	Kidney	GO:0048513	animal organ development	BP	9.82009e-08	1.48202
component_3	Kidney	GO:0005768	endosome	CC	5.73112e-06	1.48106
component_3	Kidney	GO:0005730	nucleolus	CC	1.78753e-06	1.47946
component_3	Kidney	GO:0030054	cell junction	CC	4.92143e-15	1.47896
component_3	Kidney	GO:0032446	protein modification by small protein conjugation	BP	0.000553231	1.47726
component_3	Kidney	GO:0140535	intracellular protein-containing complex	CC	0.000349131	1.47702
component_3	Kidney	GO:1901699	cellular response to nitrogen compound	BP	0.00330797	1.47429
component_3	Kidney	GO:0007167	enzyme linked receptor protein signaling pathway	BP	5.59913e-06	1.47289
component_3	Kidney	GO:0045202	synapse	CC	7.89152e-05	1.47224
component_3	Kidney	GO:0043235	receptor complex	CC	1.47604e-06	1.4704
component_3	Kidney	GO:0004674	protein serine/threonine kinase activity	MF	0.00496318	1.47037
component_3	Kidney	GO:0032412	regulation of ion transmembrane transporter activity	BP	0.00576276	1.46732
component_3	Kidney	GO:0019904	protein domain specific binding	MF	0.000436358	1.4653
component_3	Kidney	GO:0032409	regulation of transporter activity	BP	0.00299627	1.46527
component_3	Kidney	GO:0003779	actin binding	MF	0.00156574	1.46193
component_3	Kidney	GO:0048856	anatomical structure development	BP	5.62049e-20	1.45546
component_3	Kidney	GO:0019637	organophosphate metabolic process	BP	0.000231842	1.45541
component_3	Kidney	GO:0033365	protein localization to organelle	BP	0.00194492	1.45321
component_3	Kidney	GO:0070727	cellular macromolecule localization	BP	4.15707e-06	1.44882
component_3	Kidney	GO:0034613	cellular protein localization	BP	4.15707e-06	1.44882
component_3	Kidney	GO:1903829	positive regulation of protein localization	BP	0.00193891	1.44808
component_3	Kidney	GO:0015711	organic anion transport	BP	0.00926668	1.44583
component_3	Kidney	GO:0016740	transferase activity	MF	4.87479e-15	1.44523
component_3	Kidney	GO:0019787	ubiquitin-like protein transferase activity	MF	0.00280832	1.44492
component_3	Kidney	GO:0016772	transferase activity, transferring phosphorus-containing groups	MF	3.75282e-06	1.44455
component_3	Kidney	GO:0016301	kinase activity	MF	1.22223e-05	1.44078
component_3	Kidney	GO:0045597	positive regulation of cell differentiation	BP	4.47161e-06	1.43633
component_3	Kidney	GO:0008104	protein localization	BP	3.39668e-08	1.43508
component_3	Kidney	GO:0098797	plasma membrane protein complex	CC	1.22501e-06	1.42999
component_3	Kidney	GO:0005654	nucleoplasm	CC	1.56192e-22	1.42917
component_3	Kidney	GO:0008509	anion transmembrane transporter activity	MF	0.00394367	1.42903
component_3	Kidney	GO:0001228	DNA-binding transcription activator activity, RNA polymerase II-specific	MF	0.00778614	1.42885
component_3	Kidney	GO:0001216	DNA-binding transcription activator activity	MF	0.00778614	1.42885
component_3	Kidney	GO:0033218	amide binding	MF	0.00394367	1.42871
component_3	Kidney	GO:0044877	protein-containing complex binding	MF	5.87684e-09	1.42846
component_3	Kidney	GO:0071495	cellular response to endogenous stimulus	BP	0.000137456	1.42728
component_3	Kidney	GO:0033036	macromolecule localization	BP	5.28415e-08	1.42709
component_3	Kidney	GO:0005794	Golgi apparatus	CC	1.461e-06	1.42676
component_3	Kidney	GO:0044255	cellular lipid metabolic process	BP	1.5685e-05	1.42593
component_3	Kidney	GO:0005815	microtubule organizing center	CC	0.000695393	1.4259
component_3	Kidney	GO:0016773	phosphotransferase activity, alcohol group as acceptor	MF	8.85803e-05	1.42431
component_3	Kidney	GO:0009725	response to hormone	BP	0.00543756	1.42389
component_3	Kidney	GO:1901135	carbohydrate derivative metabolic process	BP	0.000980463	1.42361
component_3	Kidney	GO:2000146	negative regulation of cell motility	BP	0.00333062	1.4225
component_3	Kidney	GO:0032880	regulation of protein localization	BP	2.84088e-05	1.41849
component_3	Kidney	GO:0016567	protein ubiquitination	BP	0.00563722	1.41616
component_3	Kidney	GO:1901565	organonitrogen compound catabolic process	BP	0.000378559	1.41263
component_3	Kidney	GO:0098609	cell-cell adhesion	BP	1.09164e-05	1.41151
component_3	Kidney	GO:0016310	phosphorylation	BP	0.000146799	1.41127
component_3	Kidney	GO:0043412	macromolecule modification	BP	8.2208e-14	1.411
component_3	Kidney	GO:0043062	extracellular structure organization	BP	0.00956708	1.41002
component_3	Kidney	GO:0006897	endocytosis	BP	0.00673545	1.40774
component_3	Kidney	GO:0051271	negative regulation of cellular component movement	BP	0.00361486	1.40695
component_3	Kidney	GO:0051128	regulation of cellular component organization	BP	7.10076e-15	1.40578
component_3	Kidney	GO:0045935	positive regulation of nucleobase-containing compound metabolic process	BP	1.2472e-10	1.4053
component_3	Kidney	GO:0006464	cellular protein modification process	BP	1.35717e-12	1.40486
component_3	Kidney	GO:0036211	protein modification process	BP	1.35717e-12	1.40486
component_3	Kidney	GO:0006468	protein phosphorylation	BP	0.000517123	1.40478
component_3	Kidney	GO:0010008	endosome membrane	CC	0.00247768	1.40458
component_3	Kidney	GO:0060284	regulation of cell development	BP	0.00837203	1.40431
component_3	Kidney	GO:0016324	apical plasma membrane	CC	0.0081444	1.40421
component_3	Kidney	GO:0051668	localization within membrane	BP	0.00984529	1.40356
component_3	Kidney	GO:0005925	focal adhesion	CC	0.000534135	1.40285
component_3	Kidney	GO:0006793	phosphorus metabolic process	BP	1.06555e-08	1.40229
component_3	Kidney	GO:0051223	regulation of protein transport	BP	0.00324073	1.40171
component_3	Kidney	GO:1902494	catalytic complex	CC	2.30249e-06	1.3992
component_3	Kidney	GO:0030055	cell-substrate junction	CC	0.000398093	1.39835
component_3	Kidney	GO:0006796	phosphate-containing compound metabolic process	BP	2.99693e-08	1.39419
component_3	Kidney	GO:0051254	positive regulation of RNA metabolic process	BP	9.35251e-09	1.3937
component_3	Kidney	GO:0080135	regulation of cellular response to stress	BP	0.00128536	1.39289
component_3	Kidney	GO:0044089	positive regulation of cellular component biogenesis	BP	0.00328411	1.39129
component_3	Kidney	GO:0045893	positive regulation of transcription, DNA-templated	BP	4.93164e-08	1.39009
component_3	Kidney	GO:1903508	positive regulation of nucleic acid-templated transcription	BP	4.93164e-08	1.39009
component_3	Kidney	GO:1902680	positive regulation of RNA biosynthetic process	BP	4.93164e-08	1.39009
component_3	Kidney	GO:0032502	developmental process	BP	1.16708e-26	1.38732
component_3	Kidney	GO:0051641	cellular localization	BP	4.90511e-09	1.38658
component_3	Kidney	GO:0140096	catalytic activity, acting on a protein	MF	2.30135e-12	1.3861
component_3	Kidney	GO:0045595	regulation of cell differentiation	BP	1.68885e-08	1.38491
component_3	Kidney	GO:0016070	RNA metabolic process	BP	0.000434104	1.38435
component_3	Kidney	GO:0007169	transmembrane receptor protein tyrosine kinase signaling pathway	BP	0.00304191	1.3843
component_3	Kidney	GO:0051129	negative regulation of cellular component organization	BP	0.000213331	1.38253
component_3	Kidney	GO:0004672	protein kinase activity	MF	0.00203514	1.37934
component_3	Kidney	GO:0040013	negative regulation of locomotion	BP	0.00583193	1.37921
component_3	Kidney	GO:0070201	regulation of establishment of protein localization	BP	0.00584099	1.37861
component_3	Kidney	GO:0098590	plasma membrane region	CC	4.11255e-07	1.37582
component_3	Kidney	GO:0046483	heterocycle metabolic process	BP	2.77654e-08	1.37335
component_3	Kidney	GO:0044249	cellular biosynthetic process	BP	1.68339e-07	1.37145
component_3	Kidney	GO:0045934	negative regulation of nucleobase-containing compound metabolic process	BP	2.14939e-06	1.36953
component_3	Kidney	GO:1903507	negative regulation of nucleic acid-templated transcription	BP	1.40881e-05	1.36924
component_3	Kidney	GO:0045892	negative regulation of transcription, DNA-templated	BP	1.40881e-05	1.36924
component_3	Kidney	GO:0044267	cellular protein metabolic process	BP	1.23562e-11	1.36908
component_3	Kidney	GO:0051094	positive regulation of developmental process	BP	7.69598e-07	1.36795
component_3	Kidney	GO:0035556	intracellular signal transduction	BP	4.99953e-07	1.36789
component_3	Kidney	GO:2000026	regulation of multicellular organismal development	BP	2.75205e-07	1.36775
component_3	Kidney	GO:0006508	proteolysis	BP	0.000317264	1.36774
component_3	Kidney	GO:0008233	peptidase activity	MF	0.00496674	1.3667
component_3	Kidney	GO:0006357	regulation of transcription by RNA polymerase II	BP	8.07155e-13	1.36588
component_3	Kidney	GO:0048869	cellular developmental process	BP	2.28562e-11	1.36382
component_3	Kidney	GO:0006629	lipid metabolic process	BP	4.85243e-05	1.36326
component_3	Kidney	GO:0051130	positive regulation of cellular component organization	BP	1.43242e-05	1.36202
component_3	Kidney	GO:1902679	negative regulation of RNA biosynthetic process	BP	2.12354e-05	1.36125
component_3	Kidney	GO:1901576	organic substance biosynthetic process	BP	3.23088e-07	1.36016
component_3	Kidney	GO:0006139	nucleobase-containing compound metabolic process	BP	1.3891e-06	1.35961
component_3	Kidney	GO:0005789	endoplasmic reticulum membrane	CC	0.00456075	1.3593
component_3	Kidney	GO:0090304	nucleic acid metabolic process	BP	5.85201e-05	1.3578
component_3	Kidney	GO:0010558	negative regulation of macromolecule biosynthetic process	BP	5.59913e-06	1.35707
component_3	Kidney	GO:0010557	positive regulation of macromolecule biosynthetic process	BP	6.96876e-08	1.35606
component_3	Kidney	GO:0006725	cellular aromatic compound metabolic process	BP	1.29019e-07	1.3555
component_3	Kidney	GO:0009891	positive regulation of biosynthetic process	BP	2.17708e-08	1.35519
component_3	Kidney	GO:0044260	cellular macromolecule metabolic process	BP	5.60588e-15	1.35457
component_3	Kidney	GO:0044271	cellular nitrogen compound biosynthetic process	BP	0.000860678	1.35447
component_3	Kidney	GO:0140110	transcription regulator activity	MF	1.68965e-08	1.35381
component_3	Kidney	GO:0019538	protein metabolic process	BP	3.83166e-14	1.35314
component_3	Kidney	GO:0031328	positive regulation of cellular biosynthetic process	BP	5.23422e-08	1.3504
component_3	Kidney	GO:0043005	neuron projection	CC	5.88674e-05	1.34939
component_3	Kidney	GO:0071702	organic substance transport	BP	2.05906e-06	1.3483
component_3	Kidney	GO:0009719	response to endogenous stimulus	BP	0.000496723	1.34791
component_3	Kidney	GO:0030154	cell differentiation	BP	6.79507e-07	1.34734
component_3	Kidney	GO:0098796	membrane protein complex	CC	1.44037e-06	1.34718
component_3	Kidney	GO:0031327	negative regulation of cellular biosynthetic process	BP	8.81353e-06	1.3433
component_3	Kidney	GO:0022610	biological adhesion	BP	3.14167e-06	1.34326
component_3	Kidney	GO:0007155	cell adhesion	BP	3.14167e-06	1.34326
component_3	Kidney	GO:0044238	primary metabolic process	BP	2.39885e-24	1.34284
component_3	Kidney	GO:0050793	regulation of developmental process	BP	2.28562e-11	1.34202
component_3	Kidney	GO:0009890	negative regulation of biosynthetic process	BP	7.54366e-06	1.3406
component_3	Kidney	GO:0051253	negative regulation of RNA metabolic process	BP	4.03367e-05	1.34031
component_3	Kidney	GO:0032991	protein-containing complex	CC	1.20214e-24	1.33856
component_3	Kidney	GO:0000785	chromatin	CC	0.000310348	1.33852
component_3	Kidney	GO:0051252	regulation of RNA metabolic process	BP	4.43328e-16	1.33645
component_3	Kidney	GO:0009058	biosynthetic process	BP	1.66855e-06	1.33519
component_3	Kidney	GO:0006807	nitrogen compound metabolic process	BP	1.29264e-21	1.33448
component_3	Kidney	GO:0022603	regulation of anatomical structure morphogenesis	BP	0.000124098	1.33393
component_3	Kidney	GO:0044281	small molecule metabolic process	BP	5.26897e-05	1.33264
component_3	Kidney	GO:0022607	cellular component assembly	BP	5.08513e-08	1.3325
component_3	Kidney	GO:1901360	organic cyclic compound metabolic process	BP	1.51417e-07	1.32999
component_3	Kidney	GO:0016788	hydrolase activity, acting on ester bonds	MF	0.00602205	1.32966
component_3	Kidney	GO:0034641	cellular nitrogen compound metabolic process	BP	5.28415e-08	1.32889
component_3	Kidney	GO:2000145	regulation of cell motility	BP	1.09164e-05	1.32847
component_3	Kidney	GO:0009628	response to abiotic stimulus	BP	0.0044428	1.32833
component_3	Kidney	GO:0051172	negative regulation of nitrogen compound metabolic process	BP	1.25075e-08	1.3281
component_3	Kidney	GO:0043170	macromolecule metabolic process	BP	6.2332e-18	1.32783
component_3	Kidney	GO:0019219	regulation of nucleobase-containing compound metabolic process	BP	4.32569e-16	1.32756
component_3	Kidney	GO:0071704	organic substance metabolic process	BP	8.40434e-26	1.32733
component_3	Kidney	GO:0031325	positive regulation of cellular metabolic process	BP	2.38441e-13	1.32671
component_3	Kidney	GO:0046907	intracellular transport	BP	0.00149597	1.32563
component_3	Kidney	GO:0000976	transcription cis-regulatory region binding	MF	4.3664e-06	1.32518
component_3	Kidney	GO:0001067	transcription regulatory region nucleic acid binding	MF	4.3664e-06	1.32518
component_3	Kidney	GO:0003690	double-stranded DNA binding	MF	1.44723e-06	1.32488
component_3	Kidney	GO:0040012	regulation of locomotion	BP	1.11749e-05	1.32251
component_3	Kidney	GO:0051173	positive regulation of nitrogen compound metabolic process	BP	3.12335e-12	1.32045
component_3	Kidney	GO:0003824	catalytic activity	MF	8.04642e-22	1.32041
component_3	Kidney	GO:0016192	vesicle-mediated transport	BP	0.000110937	1.32011
component_3	Kidney	GO:0051270	regulation of cellular component movement	BP	9.52267e-06	1.31949
component_3	Kidney	GO:1903506	regulation of nucleic acid-templated transcription	BP	3.15026e-13	1.31788
component_3	Kidney	GO:0006355	regulation of transcription, DNA-templated	BP	3.15026e-13	1.31788
component_3	Kidney	GO:0043232	intracellular non-membrane-bounded organelle	CC	6.3541e-10	1.31776
component_3	Kidney	GO:0043228	non-membrane-bounded organelle	CC	6.3541e-10	1.31776
component_3	Kidney	GO:1901564	organonitrogen compound metabolic process	BP	1.90232e-15	1.31698
component_3	Kidney	GO:2001141	regulation of RNA biosynthetic process	BP	4.47554e-13	1.31526
component_3	Kidney	GO:0005737	cytoplasm	CC	4.27292e-18	1.31453
component_3	Kidney	GO:0044087	regulation of cellular component biogenesis	BP	0.000735217	1.31406
component_3	Kidney	GO:0018193	peptidyl-amino acid modification	BP	0.00984168	1.31341
component_3	Kidney	GO:0120025	plasma membrane bounded cell projection	CC	9.98784e-06	1.31234
component_3	Kidney	GO:0030334	regulation of cell migration	BP	5.09702e-05	1.31177
component_3	Kidney	GO:1990837	sequence-specific double-stranded DNA binding	MF	8.63669e-06	1.31137
component_3	Kidney	GO:0000981	DNA-binding transcription factor activity, RNA polymerase II-specific	MF	0.000101894	1.31007
component_3	Kidney	GO:0031324	negative regulation of cellular metabolic process	BP	2.64163e-08	1.30979
component_3	Kidney	GO:0043229	intracellular organelle	CC	5.93017e-44	1.30914
component_3	Kidney	GO:0044237	cellular metabolic process	BP	1.17117e-21	1.30904
component_3	Kidney	GO:0032501	multicellular organismal process	BP	2.69558e-09	1.30837
component_3	Kidney	GO:0010556	regulation of macromolecule biosynthetic process	BP	6.18156e-14	1.30815
component_3	Kidney	GO:0005829	cytosol	CC	2.60393e-20	1.30757
component_3	Kidney	GO:0009968	negative regulation of signal transduction	BP	5.53445e-05	1.30688
component_3	Kidney	GO:0009889	regulation of biosynthetic process	BP	1.89008e-14	1.30597
component_3	Kidney	GO:0003700	DNA-binding transcription factor activity	MF	6.2788e-05	1.30583
component_3	Kidney	GO:0016043	cellular component organization	BP	1.14629e-17	1.30518
component_3	Kidney	GO:0005856	cytoskeleton	CC	0.00140312	1.30492
component_3	Kidney	GO:0031326	regulation of cellular biosynthetic process	BP	3.8575e-14	1.30454
component_3	Kidney	GO:0033043	regulation of organelle organization	BP	0.000423321	1.30358
component_3	Kidney	GO:0043231	intracellular membrane-bounded organelle	CC	1.12809e-35	1.30309
component_3	Kidney	GO:0003677	DNA binding	MF	6.24147e-07	1.30257
component_3	Kidney	GO:0071840	cellular component organization or biogenesis	BP	1.49725e-17	1.30162
component_3	Kidney	GO:0043565	sequence-specific DNA binding	MF	1.27566e-05	1.30022
component_3	Kidney	GO:0019899	enzyme binding	MF	4.59905e-07	1.29899
component_3	Kidney	GO:0051171	regulation of nitrogen compound metabolic process	BP	2.31207e-20	1.29868
component_3	Kidney	GO:0042995	cell projection	CC	2.03473e-05	1.29762
component_3	Kidney	GO:0030234	enzyme regulator activity	MF	0.000244572	1.29716
component_3	Kidney	GO:0016787	hydrolase activity	MF	1.29164e-06	1.29688
component_3	Kidney	GO:0000987	cis-regulatory region sequence-specific DNA binding	MF	0.000402531	1.29667
component_3	Kidney	GO:0080090	regulation of primary metabolic process	BP	1.78363e-20	1.29555
component_3	Kidney	GO:0046983	protein dimerization activity	MF	0.00742123	1.29301
component_3	Kidney	GO:0031410	cytoplasmic vesicle	CC	9.23555e-05	1.29152
component_3	Kidney	GO:0005783	endoplasmic reticulum	CC	0.00111288	1.29134
component_3	Kidney	GO:0097708	intracellular vesicle	CC	9.17769e-05	1.29071
component_3	Kidney	GO:0031323	regulation of cellular metabolic process	BP	2.13681e-20	1.28904
component_3	Kidney	GO:0008152	metabolic process	BP	5.3257e-22	1.28854
component_3	Kidney	GO:0003676	nucleic acid binding	MF	1.58355e-09	1.28749
component_3	Kidney	GO:0007154	cell communication	BP	0.00150272	1.28709
component_3	Kidney	GO:0098588	bounding membrane of organelle	CC	4.81751e-06	1.28641
component_3	Kidney	GO:0007267	cell-cell signaling	BP	0.00726804	1.28626
component_3	Kidney	GO:0023051	regulation of signaling	BP	1.68635e-12	1.28617
component_3	Kidney	GO:0031226	intrinsic component of plasma membrane	CC	1.32081e-07	1.28471
component_3	Kidney	GO:0010646	regulation of cell communication	BP	2.75367e-12	1.28389
component_3	Kidney	GO:0005634	nucleus	CC	1.01543e-15	1.28388
component_3	Kidney	GO:0071705	nitrogen compound transport	BP	0.00418231	1.28293
component_3	Kidney	GO:1901575	organic substance catabolic process	BP	0.00265697	1.28233
component_3	Kidney	GO:0000977	RNA polymerase II transcription regulatory region sequence-specific DNA binding	MF	0.000279627	1.28087
component_3	Kidney	GO:0010604	positive regulation of macromolecule metabolic process	BP	2.26149e-11	1.28058
component_3	Kidney	GO:0000978	RNA polymerase II cis-regulatory region sequence-specific DNA binding	MF	0.00144753	1.27764
component_3	Kidney	GO:0048523	negative regulation of cellular process	BP	1.43603e-15	1.27593
component_3	Kidney	GO:0003723	RNA binding	MF	0.00353501	1.27574
component_3	Kidney	GO:0032879	regulation of localization	BP	8.33891e-10	1.27549
component_3	Kidney	GO:0051093	negative regulation of developmental process	BP	0.00913688	1.27548
component_3	Kidney	GO:0010605	negative regulation of macromolecule metabolic process	BP	2.01909e-07	1.27533
component_3	Kidney	GO:0009892	negative regulation of metabolic process	BP	5.54637e-08	1.27322
component_3	Kidney	GO:0008092	cytoskeletal protein binding	MF	0.00394367	1.27243
component_3	Kidney	GO:0009966	regulation of signal transduction	BP	6.87266e-10	1.27134
component_3	Kidney	GO:0019220	regulation of phosphate metabolic process	BP	9.41084e-05	1.27055
component_3	Kidney	GO:0051174	regulation of phosphorus metabolic process	BP	9.41084e-05	1.27055
component_3	Kidney	GO:0006996	organelle organization	BP	3.45903e-05	1.26994
component_3	Kidney	GO:0010648	negative regulation of cell communication	BP	0.000478252	1.26965
component_3	Kidney	GO:0010468	regulation of gene expression	BP	2.96179e-14	1.26964
component_3	Kidney	GO:0048522	positive regulation of cellular process	BP	2.12496e-18	1.26922
component_3	Kidney	GO:0043226	organelle	CC	5.93017e-44	1.26861
component_3	Kidney	GO:1902531	regulation of intracellular signal transduction	BP	1.57197e-05	1.26857
component_3	Kidney	GO:0043227	membrane-bounded organelle	CC	4.06594e-38	1.26793
component_3	Kidney	GO:0048585	negative regulation of response to stimulus	BP	4.74709e-05	1.26748
component_3	Kidney	GO:0005887	integral component of plasma membrane	CC	3.38963e-06	1.26485
component_3	Kidney	GO:0051179	localization	BP	4.15466e-12	1.26353
component_3	Kidney	GO:0045937	positive regulation of phosphate metabolic process	BP	0.00279285	1.26192
component_3	Kidney	GO:0010562	positive regulation of phosphorus metabolic process	BP	0.00279285	1.26192
component_3	Kidney	GO:0009986	cell surface	CC	0.00670701	1.26191
component_3	Kidney	GO:0033554	cellular response to stress	BP	0.00851512	1.26116
component_3	Kidney	GO:0009893	positive regulation of metabolic process	BP	1.04579e-10	1.25639
component_3	Kidney	GO:0023057	negative regulation of signaling	BP	0.00104853	1.25596
component_3	Kidney	GO:0060255	regulation of macromolecule metabolic process	BP	2.15568e-17	1.25557
component_3	Kidney	GO:0031090	organelle membrane	CC	3.97575e-07	1.25528
component_3	Kidney	GO:0042325	regulation of phosphorylation	BP	0.000684876	1.25473
component_3	Kidney	GO:0005886	plasma membrane	CC	1.4341e-17	1.25209
component_3	Kidney	GO:0046872	metal ion binding	MF	0.0024654	1.25036
component_3	Kidney	GO:0016020	membrane	CC	1.27987e-26	1.24963
component_3	Kidney	GO:0006928	movement of cell or subcellular component	BP	0.000213331	1.24793
component_3	Kidney	GO:0097159	organic cyclic compound binding	MF	5.21138e-09	1.24491
component_3	Kidney	GO:0019222	regulation of metabolic process	BP	1.31067e-17	1.24352
component_3	Kidney	GO:0003008	system process	BP	0.00292679	1.24141
component_3	Kidney	GO:1901363	heterocyclic compound binding	MF	1.70847e-08	1.24051
component_3	Kidney	GO:0048519	negative regulation of biological process	BP	3.33566e-13	1.2395
component_3	Kidney	GO:0009987	cellular process	BP	1.87559e-53	1.23923
component_3	Kidney	GO:0032268	regulation of cellular protein metabolic process	BP	6.06634e-05	1.2373
component_3	Kidney	GO:0110165	cellular anatomical entity	CC	1.77839e-87	1.23521
component_3	Kidney	GO:0030312	external encapsulating structure	CC	0.00591993	1.23512
component_3	Kidney	GO:0031012	extracellular matrix	CC	0.00591993	1.23512
component_3	Kidney	GO:0005515	protein binding	MF	4.58662e-56	1.23378
component_3	Kidney	GO:0042802	identical protein binding	MF	0.000160365	1.23263
component_3	Kidney	GO:0003674	molecular_function	MF	1.05501e-83	1.2312
component_3	Kidney	GO:0005575	cellular_component	CC	2.62998e-86	1.23102
component_3	Kidney	GO:0071310	cellular response to organic substance	BP	0.00595616	1.22977
component_3	Kidney	GO:0060089	molecular transducer activity	MF	0.00239737	1.22963
component_3	Kidney	GO:0038023	signaling receptor activity	MF	0.00239737	1.22963
component_3	Kidney	GO:0048518	positive regulation of biological process	BP	2.7334e-15	1.22791
component_3	Kidney	GO:0051716	cellular response to stimulus	BP	4.38762e-05	1.22675
component_3	Kidney	GO:0031399	regulation of protein modification process	BP	0.00209821	1.22648
component_3	Kidney	GO:0005488	binding	MF	1.08585e-61	1.22556
component_3	Kidney	GO:0008150	biological_process	BP	1.04769e-70	1.22548
component_3	Kidney	GO:0043169	cation binding	MF	0.00496318	1.22353
component_3	Kidney	GO:0031224	intrinsic component of membrane	CC	2.06852e-06	1.22348
component_3	Kidney	GO:0043167	ion binding	MF	0.000284979	1.2224
component_3	Kidney	GO:0050794	regulation of cellular process	BP	2.14439e-30	1.22197
component_3	Kidney	GO:0070887	cellular response to chemical stimulus	BP	0.00251262	1.21937
component_3	Kidney	GO:0051246	regulation of protein metabolic process	BP	0.000168668	1.2175
component_3	Kidney	GO:0006810	transport	BP	8.22665e-07	1.21746
component_3	Kidney	GO:0048583	regulation of response to stimulus	BP	4.14026e-09	1.21634
component_3	Kidney	GO:0050789	regulation of biological process	BP	1.36478e-30	1.21417
component_3	Kidney	GO:0065007	biological regulation	BP	6.79859e-34	1.21385
component_3	Kidney	GO:0051234	establishment of localization	BP	9.82999e-07	1.21243
component_3	Kidney	GO:0016021	integral component of membrane	CC	2.44815e-05	1.21049
component_3	Kidney	GO:0065009	regulation of molecular function	BP	4.33584e-05	1.2096
component_3	Kidney	GO:0044093	positive regulation of molecular function	BP	0.00546255	1.20275
component_3	Kidney	GO:0009967	positive regulation of signal transduction	BP	0.00593439	1.20187
component_3	Kidney	GO:0010941	regulation of cell death	BP	0.00832937	1.20062
component_3	Kidney	GO:0007165	signal transduction	BP	1.05793e-07	1.19637
component_3	Kidney	GO:0031982	vesicle	CC	6.35233e-07	1.19488
component_3	Kidney	GO:0023056	positive regulation of signaling	BP	0.0074528	1.18922
component_3	Kidney	GO:0010033	response to organic substance	BP	0.00757107	1.18638
component_3	Kidney	GO:0042221	response to chemical	BP	0.00272959	1.18056
component_3	Kidney	GO:0065008	regulation of biological quality	BP	7.32908e-05	1.1803
component_3	Kidney	GO:0051239	regulation of multicellular organismal process	BP	0.0004801	1.17708
component_3	Kidney	GO:1903561	extracellular vesicle	CC	0.000969154	1.16119
component_3	Kidney	GO:0043230	extracellular organelle	CC	0.000969154	1.16119
component_3	Kidney	GO:0065010	extracellular membrane-bounded organelle	CC	0.000969154	1.16119
component_3	Kidney	GO:0070062	extracellular exosome	CC	0.0014547	1.15683
component_4	Kidney	GO:0090482	vitamin transmembrane transporter activity	MF	0.00346476	3.02442
component_4	Kidney	GO:2000402	negative regulation of lymphocyte migration	BP	0.00726113	2.84948
component_4	Kidney	GO:0048278	vesicle docking	BP	0.00382303	2.66452
component_4	Kidney	GO:0140056	organelle localization by membrane tethering	BP	0.00382303	2.66452
component_4	Kidney	GO:0015020	glucuronosyltransferase activity	MF	0.00834027	2.57678
component_4	Kidney	GO:0042789	mRNA transcription by RNA polymerase II	BP	0.00563812	2.5642
component_4	Kidney	GO:0000123	histone acetyltransferase complex	CC	8.02389e-05	2.55038
component_4	Kidney	GO:1902562	H4 histone acetyltransferase complex	CC	0.00314804	2.54677
component_4	Kidney	GO:0004860	protein kinase inhibitor activity	MF	1.10626e-05	2.53313
component_4	Kidney	GO:0006940	regulation of smooth muscle contraction	BP	0.00216318	2.52059
component_4	Kidney	GO:0010889	regulation of sequestering of triglyceride	BP	0.00462513	2.47599
component_4	Kidney	GO:0098901	regulation of cardiac muscle cell action potential	BP	0.00409585	2.45223
component_4	Kidney	GO:0030291	protein serine/threonine kinase inhibitor activity	MF	0.000994201	2.45153
component_4	Kidney	GO:0016605	PML body	CC	0.00516853	2.43898
component_4	Kidney	GO:0005669	transcription factor TFIID complex	CC	0.00689818	2.4346
component_4	Kidney	GO:0004862	cAMP-dependent protein kinase inhibitor activity	MF	0.00858684	2.42582
component_4	Kidney	GO:1904646	cellular response to amyloid-beta	BP	0.000148494	2.42466
component_4	Kidney	GO:0090630	activation of GTPase activity	BP	1.5276e-05	2.40787
component_4	Kidney	GO:0007599	hemostasis	BP	0.000726478	2.34958
component_4	Kidney	GO:0019210	kinase inhibitor activity	MF	0.000105285	2.32362
component_4	Kidney	GO:1902493	acetyltransferase complex	CC	6.85287e-05	2.32122
component_4	Kidney	GO:0031248	protein acetyltransferase complex	CC	6.85287e-05	2.32122
component_4	Kidney	GO:0019213	deacetylase activity	MF	0.00605005	2.31306
component_4	Kidney	GO:0016758	hexosyltransferase activity	MF	1.07361e-06	2.30027
component_4	Kidney	GO:0010884	positive regulation of lipid storage	BP	0.00448059	2.2979
component_4	Kidney	GO:0000118	histone deacetylase complex	CC	0.00138122	2.29423
component_4	Kidney	GO:0022406	membrane docking	BP	0.00288706	2.29005
component_4	Kidney	GO:0043621	protein self-association	MF	0.00677531	2.28756
component_4	Kidney	GO:0019208	phosphatase regulator activity	MF	7.15352e-05	2.26438
component_4	Kidney	GO:1903509	liposaccharide metabolic process	BP	0.00481734	2.24993
component_4	Kidney	GO:0018210	peptidyl-threonine modification	BP	0.00481734	2.24913
component_4	Kidney	GO:0019888	protein phosphatase regulator activity	MF	0.000223044	2.2372
component_4	Kidney	GO:0008194	UDP-glycosyltransferase activity	MF	0.000172259	2.21639
component_4	Kidney	GO:0046579	positive regulation of Ras protein signal transduction	BP	0.0054124	2.21509
component_4	Kidney	GO:0035601	protein deacylation	BP	0.00576952	2.19271
component_4	Kidney	GO:0098732	macromolecule deacylation	BP	0.00576952	2.19271
component_4	Kidney	GO:0051057	positive regulation of small GTPase mediated signal transduction	BP	0.00125625	2.19152
component_4	Kidney	GO:0048469	cell maturation	BP	0.0004774	2.17995
component_4	Kidney	GO:0071695	anatomical structure maturation	BP	0.00018331	2.17774
component_4	Kidney	GO:0008013	beta-catenin binding	MF	0.000146109	2.17295
component_4	Kidney	GO:0070085	glycosylation	BP	0.000562396	2.15435
component_4	Kidney	GO:0016922	nuclear receptor binding	MF	0.000223044	2.15308
component_4	Kidney	GO:0046474	glycerophospholipid biosynthetic process	BP	1.74462e-07	2.15237
component_4	Kidney	GO:0006366	transcription by RNA polymerase II	BP	9.62798e-06	2.15161
component_4	Kidney	GO:0008654	phospholipid biosynthetic process	BP	6.31515e-08	2.13926
component_4	Kidney	GO:0016757	glycosyltransferase activity	MF	1.37875e-08	2.13288
component_4	Kidney	GO:0045017	glycerolipid biosynthetic process	BP	1.153e-07	2.13187
component_4	Kidney	GO:0030512	negative regulation of transforming growth factor beta receptor signaling pathway	BP	0.00102137	2.10689
component_4	Kidney	GO:0018394	peptidyl-lysine acetylation	BP	0.00462513	2.10541
component_4	Kidney	GO:0006475	internal protein amino acid acetylation	BP	0.00462513	2.10541
component_4	Kidney	GO:0016573	histone acetylation	BP	0.00462513	2.10541
component_4	Kidney	GO:0018393	internal peptidyl-lysine acetylation	BP	0.00462513	2.10541
component_4	Kidney	GO:0043413	macromolecule glycosylation	BP	0.00192747	2.10322
component_4	Kidney	GO:0006486	protein glycosylation	BP	0.00192747	2.10322
component_4	Kidney	GO:0043543	protein acylation	BP	0.000249101	2.08668
component_4	Kidney	GO:0006351	transcription, DNA-templated	BP	1.64276e-07	2.07921
component_4	Kidney	GO:0097659	nucleic acid-templated transcription	BP	1.64276e-07	2.07921
component_4	Kidney	GO:0099023	vesicle tethering complex	CC	0.00698613	2.07213
component_4	Kidney	GO:0021700	developmental maturation	BP	0.000230053	2.06427
component_4	Kidney	GO:0006661	phosphatidylinositol biosynthetic process	BP	0.000290763	2.05998
component_4	Kidney	GO:0006473	protein acetylation	BP	0.000791115	2.05126
component_4	Kidney	GO:0042826	histone deacetylase binding	MF	0.00015444	2.02655
component_4	Kidney	GO:0032774	RNA biosynthetic process	BP	5.31644e-08	2.02347
component_4	Kidney	GO:0046488	phosphatidylinositol metabolic process	BP	0.000123073	2.02154
component_4	Kidney	GO:0010883	regulation of lipid storage	BP	0.00146717	2.014
component_4	Kidney	GO:0005604	basement membrane	CC	0.00320373	1.99386
component_4	Kidney	GO:0005548	phospholipid transporter activity	MF	0.00731888	1.99056
component_4	Kidney	GO:0009581	detection of external stimulus	BP	0.00873929	1.95534
component_4	Kidney	GO:0009582	detection of abiotic stimulus	BP	0.00589915	1.92391
component_4	Kidney	GO:0006766	vitamin metabolic process	BP	0.00331565	1.90578
component_4	Kidney	GO:0006644	phospholipid metabolic process	BP	1.10838e-07	1.90227
component_4	Kidney	GO:0060271	cilium assembly	BP	0.000317563	1.89505
component_4	Kidney	GO:0090407	organophosphate biosynthetic process	BP	1.1924e-08	1.89233
component_4	Kidney	GO:0034654	nucleobase-containing compound biosynthetic process	BP	3.24845e-10	1.89055
component_4	Kidney	GO:0001650	fibrillar center	CC	0.00147635	1.88691
component_4	Kidney	GO:0030427	site of polarized growth	CC	0.00692963	1.88252
component_4	Kidney	GO:0030426	growth cone	CC	0.00692963	1.88252
component_4	Kidney	GO:1901653	cellular response to peptide	BP	0.000180245	1.87799
component_4	Kidney	GO:0051966	regulation of synaptic transmission, glutamatergic	BP	0.00346407	1.8777
component_4	Kidney	GO:0051963	regulation of synapse assembly	BP	0.00471957	1.86968
component_4	Kidney	GO:0006650	glycerophospholipid metabolic process	BP	1.33987e-06	1.86908
component_4	Kidney	GO:0030020	extracellular matrix structural constituent conferring tensile strength	MF	0.00750561	1.85861
component_4	Kidney	GO:0010631	epithelial cell migration	BP	0.0055097	1.85641
component_4	Kidney	GO:0046328	regulation of JNK cascade	BP	0.00945318	1.84299
component_4	Kidney	GO:1904645	response to amyloid-beta	BP	0.00946707	1.84223
component_4	Kidney	GO:0050807	regulation of synapse organization	BP	8.93171e-05	1.82528
component_4	Kidney	GO:0018105	peptidyl-serine phosphorylation	BP	0.00104142	1.82087
component_4	Kidney	GO:0018209	peptidyl-serine modification	BP	0.00104142	1.82087
component_4	Kidney	GO:0007399	nervous system development	BP	3.05165e-07	1.81948
component_4	Kidney	GO:0005085	guanyl-nucleotide exchange factor activity	MF	0.000736896	1.80839
component_4	Kidney	GO:0140535	intracellular protein-containing complex	CC	1.93115e-09	1.80779
component_4	Kidney	GO:0070302	regulation of stress-activated protein kinase signaling cascade	BP	0.00283511	1.80552
component_4	Kidney	GO:0050714	positive regulation of protein secretion	BP	0.00931946	1.80261
component_4	Kidney	GO:0017015	regulation of transforming growth factor beta receptor signaling pathway	BP	0.00585882	1.79922
component_4	Kidney	GO:1905954	positive regulation of lipid localization	BP	0.00331565	1.79207
component_4	Kidney	GO:0090575	RNA polymerase II transcription regulator complex	CC	0.000521326	1.78902
component_4	Kidney	GO:0032872	regulation of stress-activated MAPK cascade	BP	0.00636205	1.78022
component_4	Kidney	GO:0008081	phosphoric diester hydrolase activity	MF	0.0057034	1.77846
component_4	Kidney	GO:0005667	transcription regulator complex	CC	1.23133e-06	1.76178
component_4	Kidney	GO:1903844	regulation of cellular response to transforming growth factor beta stimulus	BP	0.00934833	1.76018
component_4	Kidney	GO:0051056	regulation of small GTPase mediated signal transduction	BP	1.19744e-05	1.73348
component_4	Kidney	GO:0120031	plasma membrane bounded cell projection assembly	BP	0.000220905	1.73095
component_4	Kidney	GO:0044782	cilium organization	BP	0.00287857	1.73042
component_4	Kidney	GO:0140513	nuclear protein-containing complex	CC	9.81605e-14	1.72832
component_4	Kidney	GO:0018205	peptidyl-lysine modification	BP	0.00292163	1.72731
component_4	Kidney	GO:0018130	heterocycle biosynthetic process	BP	2.02705e-08	1.71821
component_4	Kidney	GO:0046486	glycerolipid metabolic process	BP	1.2216e-05	1.71807
component_4	Kidney	GO:0060589	nucleoside-triphosphatase regulator activity	MF	6.70073e-07	1.70905
component_4	Kidney	GO:0030695	GTPase regulator activity	MF	6.70073e-07	1.70905
component_4	Kidney	GO:0061629	RNA polymerase II-specific DNA-binding transcription factor binding	MF	9.87806e-05	1.70741
component_4	Kidney	GO:0005096	GTPase activator activity	MF	0.000772291	1.7068
component_4	Kidney	GO:1990234	transferase complex	CC	1.53714e-07	1.70505
component_4	Kidney	GO:0019887	protein kinase regulator activity	MF	0.000180272	1.70373
component_4	Kidney	GO:0016607	nuclear speck	CC	0.000109957	1.70074
component_4	Kidney	GO:0003712	transcription coregulator activity	MF	7.16595e-06	1.68697
component_4	Kidney	GO:1901362	organic cyclic compound biosynthetic process	BP	3.76239e-09	1.68153
component_4	Kidney	GO:0001501	skeletal system development	BP	0.00414855	1.67628
component_4	Kidney	GO:0001933	negative regulation of protein phosphorylation	BP	9.1072e-06	1.67449
component_4	Kidney	GO:0019898	extrinsic component of membrane	CC	0.000499263	1.66437
component_4	Kidney	GO:0019207	kinase regulator activity	MF	0.000223044	1.65377
component_4	Kidney	GO:0019438	aromatic compound biosynthetic process	BP	4.43496e-07	1.65142
component_4	Kidney	GO:0010948	negative regulation of cell cycle process	BP	0.00405284	1.64778
component_4	Kidney	GO:0043547	positive regulation of GTPase activity	BP	0.000944036	1.64153
component_4	Kidney	GO:0006396	RNA processing	BP	0.000189615	1.63958
component_4	Kidney	GO:0071417	cellular response to organonitrogen compound	BP	0.000197758	1.63474
component_4	Kidney	GO:0030031	cell projection assembly	BP	0.00079455	1.63299
component_4	Kidney	GO:0001227	DNA-binding transcription repressor activity, RNA polymerase II-specific	MF	0.000965433	1.63214
component_4	Kidney	GO:0044853	plasma membrane raft	CC	0.00784416	1.6278
component_4	Kidney	GO:0005319	lipid transporter activity	MF	0.00124961	1.62675
component_4	Kidney	GO:0031346	positive regulation of cell projection organization	BP	0.000719557	1.62244
component_4	Kidney	GO:0001217	DNA-binding transcription repressor activity	MF	0.00118897	1.6217
component_4	Kidney	GO:0016070	RNA metabolic process	BP	9.08968e-09	1.61586
component_4	Kidney	GO:0008047	enzyme activator activity	MF	4.64485e-07	1.61565
component_4	Kidney	GO:0031400	negative regulation of protein modification process	BP	1.89235e-06	1.6151
component_4	Kidney	GO:0042326	negative regulation of phosphorylation	BP	4.78894e-05	1.61113
component_4	Kidney	GO:0016773	phosphotransferase activity, alcohol group as acceptor	MF	8.09192e-09	1.60499
component_4	Kidney	GO:0051962	positive regulation of nervous system development	BP	0.00598688	1.60441
component_4	Kidney	GO:0001228	DNA-binding transcription activator activity, RNA polymerase II-specific	MF	0.000146109	1.6007
component_4	Kidney	GO:0001216	DNA-binding transcription activator activity	MF	0.000146109	1.6007
component_4	Kidney	GO:0016604	nuclear body	CC	7.97606e-07	1.59468
component_4	Kidney	GO:0050808	synapse organization	BP	0.00624807	1.57532
component_4	Kidney	GO:0009991	response to extracellular stimulus	BP	0.00873929	1.57511
component_4	Kidney	GO:0008134	transcription factor binding	MF	3.5291e-06	1.57361
component_4	Kidney	GO:0034660	ncRNA metabolic process	BP	0.00445772	1.5717
component_4	Kidney	GO:0004674	protein serine/threonine kinase activity	MF	0.000581541	1.57061
component_4	Kidney	GO:0080135	regulation of cellular response to stress	BP	2.93789e-06	1.56941
component_4	Kidney	GO:0016772	transferase activity, transferring phosphorus-containing groups	MF	3.02706e-09	1.56933
component_4	Kidney	GO:0005813	centrosome	CC	9.26332e-05	1.56783
component_4	Kidney	GO:0120036	plasma membrane bounded cell projection organization	BP	2.01908e-05	1.56159
component_4	Kidney	GO:0045786	negative regulation of cell cycle	BP	0.00691978	1.55879
component_4	Kidney	GO:0097485	neuron projection guidance	BP	0.00132546	1.55151
component_4	Kidney	GO:0007411	axon guidance	BP	0.00132546	1.55151
component_4	Kidney	GO:0043062	extracellular structure organization	BP	0.000522734	1.55088
component_4	Kidney	GO:0019637	organophosphate metabolic process	BP	1.5276e-05	1.55078
component_4	Kidney	GO:0048731	system development	BP	6.34834e-08	1.54431
component_4	Kidney	GO:0043412	macromolecule modification	BP	3.55171e-21	1.54391
component_4	Kidney	GO:0016740	transferase activity	MF	8.92296e-20	1.5386
component_4	Kidney	GO:0030234	enzyme regulator activity	MF	3.81595e-12	1.53821
component_4	Kidney	GO:0043087	regulation of GTPase activity	BP	0.00331565	1.53586
component_4	Kidney	GO:0005815	microtubule organizing center	CC	4.54049e-05	1.53567
component_4	Kidney	GO:0140297	DNA-binding transcription factor binding	MF	0.00069495	1.53529
component_4	Kidney	GO:0016301	kinase activity	MF	1.41358e-07	1.53518
component_4	Kidney	GO:0070925	organelle assembly	BP	0.00257528	1.53244
component_4	Kidney	GO:0006464	cellular protein modification process	BP	3.65475e-19	1.53094
component_4	Kidney	GO:0036211	protein modification process	BP	3.65475e-19	1.53094
component_4	Kidney	GO:0045229	external encapsulating structure organization	BP	0.00132546	1.52845
component_4	Kidney	GO:0030198	extracellular matrix organization	BP	0.00132546	1.52845
component_4	Kidney	GO:0018193	peptidyl-amino acid modification	BP	3.24306e-06	1.52669
component_4	Kidney	GO:0006793	phosphorus metabolic process	BP	2.70998e-13	1.52656
component_4	Kidney	GO:0004672	protein kinase activity	MF	1.00441e-05	1.52616
component_4	Kidney	GO:0016310	phosphorylation	BP	2.65496e-06	1.52058
component_4	Kidney	GO:0000981	DNA-binding transcription factor activity, RNA polymerase II-specific	MF	1.23563e-11	1.51954
component_4	Kidney	GO:0005201	extracellular matrix structural constituent	MF	0.000368886	1.51884
component_4	Kidney	GO:0006796	phosphate-containing compound metabolic process	BP	9.64594e-13	1.5174
component_4	Kidney	GO:1901699	cellular response to nitrogen compound	BP	0.00276509	1.51647
component_4	Kidney	GO:0140110	transcription regulator activity	MF	8.32776e-16	1.51123
component_4	Kidney	GO:1902494	catalytic complex	CC	6.04762e-09	1.51068
component_4	Kidney	GO:0045936	negative regulation of phosphate metabolic process	BP	0.000317563	1.50977
component_4	Kidney	GO:0010563	negative regulation of phosphorus metabolic process	BP	0.000317563	1.50977
component_4	Kidney	GO:0045944	positive regulation of transcription by RNA polymerase II	BP	1.40535e-08	1.50882
component_4	Kidney	GO:0000978	RNA polymerase II cis-regulatory region sequence-specific DNA binding	MF	8.07183e-10	1.49609
component_4	Kidney	GO:0042578	phosphoric ester hydrolase activity	MF	0.00356446	1.49218
component_4	Kidney	GO:0051248	negative regulation of protein metabolic process	BP	7.09966e-07	1.48236
component_4	Kidney	GO:0032269	negative regulation of cellular protein metabolic process	BP	1.86888e-06	1.48155
component_4	Kidney	GO:0031344	regulation of cell projection organization	BP	0.000113272	1.48136
component_4	Kidney	GO:0060284	regulation of cell development	BP	0.00230202	1.48024
component_4	Kidney	GO:0007275	multicellular organism development	BP	0.00760121	1.48007
component_4	Kidney	GO:0000987	cis-regulatory region sequence-specific DNA binding	MF	2.23176e-09	1.47747
component_4	Kidney	GO:0008610	lipid biosynthetic process	BP	0.000516532	1.47712
component_4	Kidney	GO:0051254	positive regulation of RNA metabolic process	BP	1.54335e-11	1.47601
component_4	Kidney	GO:0006468	protein phosphorylation	BP	9.67946e-05	1.47488
component_4	Kidney	GO:0090287	regulation of cellular response to growth factor stimulus	BP	0.0082694	1.47379
component_4	Kidney	GO:0003700	DNA-binding transcription factor activity	MF	1.6581e-10	1.47321
component_4	Kidney	GO:0098857	membrane microdomain	CC	0.00314804	1.46989
component_4	Kidney	GO:0045121	membrane raft	CC	0.00314804	1.46989
component_4	Kidney	GO:0045893	positive regulation of transcription, DNA-templated	BP	2.6095e-10	1.46796
component_4	Kidney	GO:1903508	positive regulation of nucleic acid-templated transcription	BP	2.6095e-10	1.46796
component_4	Kidney	GO:1902680	positive regulation of RNA biosynthetic process	BP	2.6095e-10	1.46796
component_4	Kidney	GO:0030030	cell projection organization	BP	9.8971e-05	1.46746
component_4	Kidney	GO:0010557	positive regulation of macromolecule biosynthetic process	BP	5.64739e-12	1.4669
component_4	Kidney	GO:0005730	nucleolus	CC	1.43376e-05	1.46606
component_4	Kidney	GO:0120035	regulation of plasma membrane bounded cell projection organization	BP	0.000275121	1.46488
component_4	Kidney	GO:0000977	RNA polymerase II transcription regulatory region sequence-specific DNA binding	MF	3.98364e-10	1.46176
component_4	Kidney	GO:0044267	cellular protein metabolic process	BP	3.20104e-16	1.46156
component_4	Kidney	GO:0034329	cell junction assembly	BP	0.00976434	1.45196
component_4	Kidney	GO:0090304	nucleic acid metabolic process	BP	7.62022e-07	1.44886
component_4	Kidney	GO:0070647	protein modification by small protein conjugation or removal	BP	0.00160262	1.44876
component_4	Kidney	GO:0003690	double-stranded DNA binding	MF	3.11756e-11	1.44687
component_4	Kidney	GO:0000976	transcription cis-regulatory region binding	MF	2.22806e-10	1.44635
component_4	Kidney	GO:0001067	transcription regulatory region nucleic acid binding	MF	2.22806e-10	1.44635
component_4	Kidney	GO:0048513	animal organ development	BP	4.89612e-06	1.44484
component_4	Kidney	GO:0045597	positive regulation of cell differentiation	BP	1.2216e-05	1.44273
component_4	Kidney	GO:0035556	intracellular signal transduction	BP	6.0942e-09	1.43822
component_4	Kidney	GO:0034330	cell junction organization	BP	0.00176462	1.43738
component_4	Kidney	GO:0003677	DNA binding	MF	6.92264e-13	1.43558
component_4	Kidney	GO:1990837	sequence-specific double-stranded DNA binding	MF	3.98364e-10	1.4315
component_4	Kidney	GO:0008289	lipid binding	MF	0.000223044	1.42839
component_4	Kidney	GO:0051129	negative regulation of cellular component organization	BP	8.68333e-05	1.42695
component_4	Kidney	GO:0043565	sequence-specific DNA binding	MF	3.60782e-10	1.42659
component_4	Kidney	GO:0019901	protein kinase binding	MF	0.000260335	1.42537
component_4	Kidney	GO:0009653	anatomical structure morphogenesis	BP	3.97117e-08	1.42522
component_4	Kidney	GO:0051128	regulation of cellular component organization	BP	8.49075e-15	1.42408
component_4	Kidney	GO:0051090	regulation of DNA-binding transcription factor activity	BP	0.00444459	1.42262
component_4	Kidney	GO:0051172	negative regulation of nitrogen compound metabolic process	BP	7.28563e-13	1.42205
component_4	Kidney	GO:0031328	positive regulation of cellular biosynthetic process	BP	1.91285e-10	1.42174
component_4	Kidney	GO:0045935	positive regulation of nucleobase-containing compound metabolic process	BP	3.37919e-10	1.41549
component_4	Kidney	GO:0009891	positive regulation of biosynthetic process	BP	2.13873e-10	1.41539
component_4	Kidney	GO:0031324	negative regulation of cellular metabolic process	BP	2.70998e-13	1.41473
component_4	Kidney	GO:0005654	nucleoplasm	CC	5.24922e-19	1.4134
component_4	Kidney	GO:0006139	nucleobase-containing compound metabolic process	BP	1.2239e-07	1.41046
component_4	Kidney	GO:0032446	protein modification by small protein conjugation	BP	0.00934833	1.40978
component_4	Kidney	GO:0071495	cellular response to endogenous stimulus	BP	0.000835045	1.4095
component_4	Kidney	GO:0005794	Golgi apparatus	CC	1.73072e-05	1.40928
component_4	Kidney	GO:0005768	endosome	CC	0.000524703	1.40726
component_4	Kidney	GO:0140096	catalytic activity, acting on a protein	MF	1.62234e-12	1.40649
component_4	Kidney	GO:0044089	positive regulation of cellular component biogenesis	BP	0.00448059	1.40535
component_4	Kidney	GO:0046483	heterocycle metabolic process	BP	9.86222e-09	1.40213
component_4	Kidney	GO:0045934	negative regulation of nucleobase-containing compound metabolic process	BP	8.97185e-07	1.40071
component_4	Kidney	GO:0051253	negative regulation of RNA metabolic process	BP	2.67863e-06	1.40049
component_4	Kidney	GO:0000122	negative regulation of transcription by RNA polymerase II	BP	0.000241735	1.39906
component_4	Kidney	GO:0044255	cellular lipid metabolic process	BP	0.000237273	1.3964
component_4	Kidney	GO:0043065	positive regulation of apoptotic process	BP	0.00638514	1.39521
component_4	Kidney	GO:0051252	regulation of RNA metabolic process	BP	1.25058e-19	1.39242
component_4	Kidney	GO:1903507	negative regulation of nucleic acid-templated transcription	BP	1.33163e-05	1.39098
component_4	Kidney	GO:0045892	negative regulation of transcription, DNA-templated	BP	1.33163e-05	1.39098
component_4	Kidney	GO:0006357	regulation of transcription by RNA polymerase II	BP	3.99726e-13	1.38965
component_4	Kidney	GO:1903506	regulation of nucleic acid-templated transcription	BP	9.81103e-18	1.38728
component_4	Kidney	GO:0006355	regulation of transcription, DNA-templated	BP	9.81103e-18	1.38728
component_4	Kidney	GO:0070201	regulation of establishment of protein localization	BP	0.00971213	1.38636
component_4	Kidney	GO:0051130	positive regulation of cellular component organization	BP	1.14834e-05	1.38636
component_4	Kidney	GO:0043068	positive regulation of programmed cell death	BP	0.00676891	1.38515
component_4	Kidney	GO:2001141	regulation of RNA biosynthetic process	BP	1.5516e-17	1.38452
component_4	Kidney	GO:0005829	cytosol	CC	3.18753e-28	1.38315
component_4	Kidney	GO:1902679	negative regulation of RNA biosynthetic process	BP	2.03917e-05	1.38287
component_4	Kidney	GO:1901576	organic substance biosynthetic process	BP	3.54605e-07	1.37916
component_4	Kidney	GO:0019219	regulation of nucleobase-containing compound metabolic process	BP	1.77631e-19	1.37863
component_4	Kidney	GO:0019900	kinase binding	MF	0.000736896	1.3765
component_4	Kidney	GO:0006629	lipid metabolic process	BP	9.714e-05	1.37449
component_4	Kidney	GO:0019538	protein metabolic process	BP	2.05006e-14	1.37368
component_4	Kidney	GO:0044238	primary metabolic process	BP	7.01619e-26	1.37233
component_4	Kidney	GO:0044260	cellular macromolecule metabolic process	BP	5.50758e-15	1.371
component_4	Kidney	GO:1901360	organic cyclic compound metabolic process	BP	1.60201e-08	1.37023
component_4	Kidney	GO:0010556	regulation of macromolecule biosynthetic process	BP	5.27618e-18	1.3694
component_4	Kidney	GO:0051641	cellular localization	BP	1.73508e-07	1.36831
component_4	Kidney	GO:1901701	cellular response to oxygen-containing compound	BP	0.00159396	1.3656
component_4	Kidney	GO:0044249	cellular biosynthetic process	BP	1.28362e-06	1.36555
component_4	Kidney	GO:0043086	negative regulation of catalytic activity	BP	0.00605119	1.36541
component_4	Kidney	GO:0031326	regulation of cellular biosynthetic process	BP	2.91071e-18	1.3646
component_4	Kidney	GO:0045595	regulation of cell differentiation	BP	7.40286e-07	1.36193
component_4	Kidney	GO:0031327	negative regulation of cellular biosynthetic process	BP	1.05048e-05	1.36179
component_4	Kidney	GO:0009889	regulation of biosynthetic process	BP	3.64772e-18	1.36083
component_4	Kidney	GO:0009058	biosynthetic process	BP	1.51381e-06	1.35502
component_4	Kidney	GO:0006725	cellular aromatic compound metabolic process	BP	7.07291e-07	1.35406
component_4	Kidney	GO:0044087	regulation of cellular component biogenesis	BP	0.000290763	1.35393
component_4	Kidney	GO:0010605	negative regulation of macromolecule metabolic process	BP	5.85658e-11	1.35363
component_4	Kidney	GO:0043170	macromolecule metabolic process	BP	2.02821e-18	1.34868
component_4	Kidney	GO:0051345	positive regulation of hydrolase activity	BP	0.00740845	1.34778
component_4	Kidney	GO:0019899	enzyme binding	MF	6.85614e-09	1.34617
component_4	Kidney	GO:1901700	response to oxygen-containing compound	BP	0.000147578	1.34573
component_4	Kidney	GO:0006807	nitrogen compound metabolic process	BP	2.81655e-20	1.34021
component_4	Kidney	GO:0043231	intracellular membrane-bounded organelle	CC	5.56599e-40	1.33767
component_4	Kidney	GO:0005634	nucleus	CC	1.14513e-19	1.33623
component_4	Kidney	GO:0010558	negative regulation of macromolecule biosynthetic process	BP	8.86904e-05	1.336
component_4	Kidney	GO:0008104	protein localization	BP	0.000189392	1.33227
component_4	Kidney	GO:0005737	cytoplasm	CC	5.64928e-18	1.32936
component_4	Kidney	GO:0009892	negative regulation of metabolic process	BP	2.16175e-10	1.32909
component_4	Kidney	GO:0009890	negative regulation of biosynthetic process	BP	7.80306e-05	1.32707
component_4	Kidney	GO:0051173	positive regulation of nitrogen compound metabolic process	BP	1.59839e-11	1.32598
component_4	Kidney	GO:0097708	intracellular vesicle	CC	3.60642e-05	1.32586
component_4	Kidney	GO:0031410	cytoplasmic vesicle	CC	4.21205e-05	1.32555
component_4	Kidney	GO:0071704	organic substance metabolic process	BP	4.84481e-23	1.32539
component_4	Kidney	GO:0043229	intracellular organelle	CC	5.59434e-44	1.32536
component_4	Kidney	GO:0033036	macromolecule localization	BP	0.000265061	1.32484
component_4	Kidney	GO:0031325	positive regulation of cellular metabolic process	BP	5.73431e-12	1.32389
component_4	Kidney	GO:0003676	nucleic acid binding	MF	6.14997e-11	1.32
component_4	Kidney	GO:0070727	cellular macromolecule localization	BP	0.00570721	1.3188
component_4	Kidney	GO:0034613	cellular protein localization	BP	0.00570721	1.3188
component_4	Kidney	GO:0010468	regulation of gene expression	BP	6.45016e-18	1.31707
component_4	Kidney	GO:0080090	regulation of primary metabolic process	BP	4.13828e-21	1.31586
component_4	Kidney	GO:0044237	cellular metabolic process	BP	1.93655e-20	1.31494
component_4	Kidney	GO:0051171	regulation of nitrogen compound metabolic process	BP	2.21383e-20	1.31445
component_4	Kidney	GO:0010604	positive regulation of macromolecule metabolic process	BP	7.51029e-13	1.31307
component_4	Kidney	GO:0031323	regulation of cellular metabolic process	BP	2.21549e-21	1.31213
component_4	Kidney	GO:0023051	regulation of signaling	BP	3.28565e-13	1.30946
component_4	Kidney	GO:0010646	regulation of cell communication	BP	4.64121e-13	1.30714
component_4	Kidney	GO:0016192	vesicle-mediated transport	BP	0.000780661	1.3063
component_4	Kidney	GO:0051338	regulation of transferase activity	BP	0.00257056	1.3057
component_4	Kidney	GO:0051094	positive regulation of developmental process	BP	0.000251942	1.30427
component_4	Kidney	GO:0048585	negative regulation of response to stimulus	BP	9.92726e-06	1.30374
component_4	Kidney	GO:0042325	regulation of phosphorylation	BP	0.000126794	1.29935
component_4	Kidney	GO:0044281	small molecule metabolic process	BP	0.00132546	1.29589
component_4	Kidney	GO:0003824	catalytic activity	MF	8.98208e-17	1.29512
component_4	Kidney	GO:0048523	negative regulation of cellular process	BP	3.69993e-16	1.29403
component_4	Kidney	GO:0051093	negative regulation of developmental process	BP	0.00968158	1.294
component_4	Kidney	GO:0043549	regulation of kinase activity	BP	0.00781709	1.29379
component_4	Kidney	GO:0000785	chromatin	CC	0.00529772	1.293
component_4	Kidney	GO:1901564	organonitrogen compound metabolic process	BP	4.55528e-12	1.29257
component_4	Kidney	GO:0098588	bounding membrane of organelle	CC	1.32771e-05	1.29216
component_4	Kidney	GO:0032991	protein-containing complex	CC	7.77169e-17	1.2918
component_4	Kidney	GO:0071840	cellular component organization or biogenesis	BP	5.25265e-15	1.29154
component_4	Kidney	GO:0009893	positive regulation of metabolic process	BP	1.39997e-12	1.29146
component_4	Kidney	GO:0008152	metabolic process	BP	2.21383e-20	1.29108
component_4	Kidney	GO:0097159	organic cyclic compound binding	MF	1.23563e-11	1.28974
component_4	Kidney	GO:0016043	cellular component organization	BP	1.51371e-14	1.28892
component_4	Kidney	GO:0030312	external encapsulating structure	CC	0.00128917	1.28807
component_4	Kidney	GO:0031012	extracellular matrix	CC	0.00128917	1.28807
component_4	Kidney	GO:0009966	regulation of signal transduction	BP	4.89962e-10	1.28605
component_4	Kidney	GO:0032502	developmental process	BP	1.72127e-13	1.28547
component_4	Kidney	GO:0060255	regulation of macromolecule metabolic process	BP	1.39194e-19	1.28488
component_4	Kidney	GO:0001932	regulation of protein phosphorylation	BP	0.000907133	1.28244
component_4	Kidney	GO:0009968	negative regulation of signal transduction	BP	0.000844391	1.28192
component_4	Kidney	GO:1901363	heterocyclic compound binding	MF	1.1256e-10	1.28096
component_4	Kidney	GO:0050793	regulation of developmental process	BP	5.59356e-07	1.28021
component_4	Kidney	GO:0048856	anatomical structure development	BP	3.98431e-07	1.27932
component_4	Kidney	GO:0043227	membrane-bounded organelle	CC	4.48702e-37	1.27733
component_4	Kidney	GO:0048522	positive regulation of cellular process	BP	6.45016e-18	1.27731
component_4	Kidney	GO:0019222	regulation of metabolic process	BP	8.36603e-20	1.27147
component_4	Kidney	GO:0043226	organelle	CC	1.38463e-40	1.27067
component_4	Kidney	GO:0048519	negative regulation of biological process	BP	7.70345e-15	1.26666
component_4	Kidney	GO:0050794	regulation of cellular process	BP	4.9254e-40	1.26654
component_4	Kidney	GO:0030154	cell differentiation	BP	0.00089206	1.26534
component_4	Kidney	GO:0048518	positive regulation of biological process	BP	8.32112e-19	1.26526
component_4	Kidney	GO:0098772	molecular function regulator	MF	2.25287e-05	1.26518
component_4	Kidney	GO:0006928	movement of cell or subcellular component	BP	0.000251264	1.26035
component_4	Kidney	GO:0031399	regulation of protein modification process	BP	0.000726478	1.26001
component_4	Kidney	GO:0050790	regulation of catalytic activity	BP	8.21634e-05	1.25889
component_4	Kidney	GO:0005515	protein binding	MF	1.94971e-61	1.25663
component_4	Kidney	GO:0005488	binding	MF	6.46756e-72	1.25489
component_4	Kidney	GO:0065007	biological regulation	BP	7.99566e-44	1.25426
component_4	Kidney	GO:0006996	organelle organization	BP	0.000392427	1.25395
component_4	Kidney	GO:0019220	regulation of phosphate metabolic process	BP	0.000914609	1.25388
component_4	Kidney	GO:0051174	regulation of phosphorus metabolic process	BP	0.000914609	1.25388
component_4	Kidney	GO:0051179	localization	BP	3.99737e-10	1.25232
component_4	Kidney	GO:0050789	regulation of biological process	BP	6.79401e-39	1.25224
component_4	Kidney	GO:0022607	cellular component assembly	BP	0.000301493	1.25188
component_4	Kidney	GO:0003674	molecular_function	MF	1.91937e-90	1.2516
component_4	Kidney	GO:0110165	cellular anatomical entity	CC	5.99206e-90	1.24979
component_4	Kidney	GO:0051240	positive regulation of multicellular organismal process	BP	0.000930618	1.24951
component_4	Kidney	GO:0043167	ion binding	MF	7.07769e-05	1.24848
component_4	Kidney	GO:0022610	biological adhesion	BP	0.00436085	1.24762
component_4	Kidney	GO:0007155	cell adhesion	BP	0.00436085	1.24762
component_4	Kidney	GO:0010941	regulation of cell death	BP	0.00132546	1.24739
component_4	Kidney	GO:0005575	cellular_component	CC	1.21044e-89	1.2467
component_4	Kidney	GO:0010648	negative regulation of cell communication	BP	0.00479768	1.2454
component_4	Kidney	GO:0008150	biological_process	BP	3.98679e-74	1.24173
component_4	Kidney	GO:0098590	plasma membrane region	CC	0.0057764	1.24096
component_4	Kidney	GO:0009987	cellular process	BP	3.45755e-48	1.23866
component_4	Kidney	GO:0051049	regulation of transport	BP	0.00079455	1.23591
component_4	Kidney	GO:0065009	regulation of molecular function	BP	9.92726e-06	1.23584
component_4	Kidney	GO:0048583	regulation of response to stimulus	BP	8.96805e-10	1.23435
component_4	Kidney	GO:0032879	regulation of localization	BP	1.89235e-06	1.23274
component_4	Kidney	GO:0023057	negative regulation of signaling	BP	0.00873929	1.23197
component_4	Kidney	GO:0034641	cellular nitrogen compound metabolic process	BP	0.000914609	1.23195
component_4	Kidney	GO:0006810	transport	BP	9.7659e-07	1.22735
component_4	Kidney	GO:0051234	establishment of localization	BP	8.13104e-07	1.22499
component_4	Kidney	GO:0031090	organelle membrane	CC	4.40811e-05	1.22408
component_4	Kidney	GO:0016020	membrane	CC	5.97519e-19	1.22051
component_4	Kidney	GO:0051246	regulation of protein metabolic process	BP	0.000428743	1.21987
component_4	Kidney	GO:0032268	regulation of cellular protein metabolic process	BP	0.00132546	1.21292
component_4	Kidney	GO:0044093	positive regulation of molecular function	BP	0.00746884	1.21238
component_4	Kidney	GO:0051716	cellular response to stimulus	BP	0.000568929	1.21176
component_4	Kidney	GO:1902531	regulation of intracellular signal transduction	BP	0.00345245	1.21163
component_4	Kidney	GO:0043232	intracellular non-membrane-bounded organelle	CC	0.000337302	1.20943
component_4	Kidney	GO:0043228	non-membrane-bounded organelle	CC	0.000337302	1.20943
component_4	Kidney	GO:0048869	cellular developmental process	BP	0.00136932	1.20939
component_4	Kidney	GO:0042802	identical protein binding	MF	0.00160589	1.20876
component_4	Kidney	GO:0030054	cell junction	CC	0.00628846	1.20484
component_4	Kidney	GO:0010033	response to organic substance	BP	0.00934833	1.19666
component_4	Kidney	GO:0005886	plasma membrane	CC	1.28626e-09	1.19532
component_4	Kidney	GO:0016787	hydrolase activity	MF	0.00741119	1.19402
component_4	Kidney	GO:0051239	regulation of multicellular organismal process	BP	0.00118555	1.17869
component_4	Kidney	GO:0007165	signal transduction	BP	1.75833e-05	1.17332
component_4	Kidney	GO:0032501	multicellular organismal process	BP	0.00835154	1.17113
component_5	Kidney	GO:0008131	primary amine oxidase activity	MF	0.00677654	3.34643
component_5	Kidney	GO:0042219	cellular modified amino acid catabolic process	BP	0.0012374	3.25164
component_5	Kidney	GO:0006751	glutathione catabolic process	BP	0.00869151	3.19586
component_5	Kidney	GO:0016638	oxidoreductase activity, acting on the CH-NH2 group of donors	MF	0.000239311	3.05497
component_5	Kidney	GO:0016641	oxidoreductase activity, acting on the CH-NH2 group of donors, oxygen as acceptor	MF	0.000239311	3.05497
component_5	Kidney	GO:0044273	sulfur compound catabolic process	BP	0.000511557	3.02956
component_5	Kidney	GO:0046677	response to antibiotic	BP	0.000641751	2.96692
component_5	Kidney	GO:0150117	positive regulation of cell-substrate junction organization	BP	0.00364469	2.91622
component_5	Kidney	GO:0019840	isoprenoid binding	MF	0.00447544	2.89173
component_5	Kidney	GO:0005501	retinoid binding	MF	0.00447544	2.89173
component_5	Kidney	GO:1905563	negative regulation of vascular endothelial cell proliferation	BP	0.00420745	2.86765
component_5	Kidney	GO:0097443	sorting endosome	CC	0.00251902	2.86548
component_5	Kidney	GO:0038084	vascular endothelial growth factor signaling pathway	BP	0.00103225	2.8491
component_5	Kidney	GO:2000785	regulation of autophagosome assembly	BP	0.0057554	2.77318
component_5	Kidney	GO:0044088	regulation of vacuole organization	BP	0.0057554	2.77318
component_5	Kidney	GO:0016010	dystrophin-associated glycoprotein complex	CC	0.00362887	2.75703
component_5	Kidney	GO:0003007	heart morphogenesis	BP	0.00631113	2.74704
component_5	Kidney	GO:0043966	histone H3 acetylation	BP	0.00668697	2.73119
component_5	Kidney	GO:0001885	endothelial cell development	BP	0.00169787	2.72451
component_5	Kidney	GO:0061028	establishment of endothelial barrier	BP	0.00169787	2.72451
component_5	Kidney	GO:0003222	ventricular trabecula myocardium morphogenesis	BP	0.00695459	2.71748
component_5	Kidney	GO:0048010	vascular endothelial growth factor receptor signaling pathway	BP	0.000122641	2.71692
component_5	Kidney	GO:0048675	axon extension	BP	0.000535107	2.69301
component_5	Kidney	GO:0000123	histone acetyltransferase complex	CC	1.85894e-05	2.68664
component_5	Kidney	GO:1902562	H4 histone acetyltransferase complex	CC	0.00120362	2.68284
component_5	Kidney	GO:0048846	axon extension involved in axon guidance	BP	0.00804916	2.67526
component_5	Kidney	GO:1902284	neuron projection extension involved in neuron projection guidance	BP	0.00804916	2.67526
component_5	Kidney	GO:0035256	G protein-coupled glutamate receptor binding	MF	0.00927164	2.67148
component_5	Kidney	GO:0072310	glomerular epithelial cell development	BP	0.000590357	2.67023
component_5	Kidney	GO:0072015	glomerular visceral epithelial cell development	BP	0.000590357	2.67023
component_5	Kidney	GO:0030374	nuclear receptor coactivator activity	MF	0.00927164	2.66772
component_5	Kidney	GO:0036057	slit diaphragm	CC	0.00127459	2.66622
component_5	Kidney	GO:0036056	filtration diaphragm	CC	0.00127459	2.66622
component_5	Kidney	GO:0008301	DNA binding, bending	MF	0.00932525	2.66397
component_5	Kidney	GO:0031970	organelle envelope lumen	CC	0.00535465	2.638
component_5	Kidney	GO:0032878	regulation of establishment or maintenance of cell polarity	BP	0.00265564	2.62484
component_5	Kidney	GO:0010889	regulation of sequestering of triglyceride	BP	0.00148836	2.60827
component_5	Kidney	GO:0007584	response to nutrient	BP	0.000826337	2.60295
component_5	Kidney	GO:0001654	eye development	BP	0.000921564	2.58167
component_5	Kidney	GO:0043534	blood vessel endothelial cell migration	BP	4.67409e-05	2.56855
component_5	Kidney	GO:0010890	positive regulation of sequestering of triglyceride	BP	0.00626444	2.56728
component_5	Kidney	GO:0002042	cell migration involved in sprouting angiogenesis	BP	0.000554636	2.56597
component_5	Kidney	GO:0032330	regulation of chondrocyte differentiation	BP	0.00359633	2.55681
component_5	Kidney	GO:0032993	protein-DNA complex	CC	1.36066e-05	2.55191
component_5	Kidney	GO:0035254	glutamate receptor binding	MF	0.00447638	2.52814
component_5	Kidney	GO:0010866	regulation of triglyceride biosynthetic process	BP	0.00755071	2.52022
component_5	Kidney	GO:0008525	phosphatidylcholine transporter activity	MF	0.00144229	2.51538
component_5	Kidney	GO:1901661	quinone metabolic process	BP	0.00439963	2.5054
component_5	Kidney	GO:0035035	histone acetyltransferase binding	MF	0.00524239	2.4909
component_5	Kidney	GO:0150116	regulation of cell-substrate junction organization	BP	2.0103e-05	2.47076
component_5	Kidney	GO:0005902	microvillus	CC	0.000952804	2.46839
component_5	Kidney	GO:0060412	ventricular septum morphogenesis	BP	0.000244693	2.46144
component_5	Kidney	GO:0032232	negative regulation of actin filament bundle assembly	BP	0.000244693	2.46144
component_5	Kidney	GO:0090109	regulation of cell-substrate junction assembly	BP	7.16937e-05	2.46127
component_5	Kidney	GO:0051893	regulation of focal adhesion assembly	BP	7.16937e-05	2.46127
component_5	Kidney	GO:0030175	filopodium	CC	8.29857e-07	2.45666
component_5	Kidney	GO:0046915	transition metal ion transmembrane transporter activity	MF	0.00389212	2.43968
component_5	Kidney	GO:0005581	collagen trimer	CC	2.30891e-05	2.43093
component_5	Kidney	GO:0061035	regulation of cartilage development	BP	0.00299262	2.42313
component_5	Kidney	GO:0010884	positive regulation of lipid storage	BP	0.00160325	2.42067
component_5	Kidney	GO:0031490	chromatin DNA binding	MF	0.00720798	2.41715
component_5	Kidney	GO:1990138	neuron projection extension	BP	0.000303372	2.41361
component_5	Kidney	GO:0060560	developmental growth involved in morphogenesis	BP	0.000303372	2.41361
component_5	Kidney	GO:0022406	membrane docking	BP	0.000932882	2.4124
component_5	Kidney	GO:0072091	regulation of stem cell proliferation	BP	0.00667502	2.41223
component_5	Kidney	GO:0002064	epithelial cell development	BP	4.70746e-07	2.39324
component_5	Kidney	GO:0045444	fat cell differentiation	BP	0.0032605	2.39152
component_5	Kidney	GO:0048407	platelet-derived growth factor binding	MF	0.00649708	2.39152
component_5	Kidney	GO:0051497	negative regulation of stress fiber assembly	BP	0.00102545	2.38893
component_5	Kidney	GO:1903509	liposaccharide metabolic process	BP	0.00111347	2.37014
component_5	Kidney	GO:1903078	positive regulation of protein localization to plasma membrane	BP	0.00114833	2.36338
component_5	Kidney	GO:1904377	positive regulation of protein localization to cell periphery	BP	0.00114833	2.36338
component_5	Kidney	GO:0046579	positive regulation of Ras protein signal transduction	BP	0.00130754	2.33343
component_5	Kidney	GO:0006775	fat-soluble vitamin metabolic process	BP	0.00407433	2.32498
component_5	Kidney	GO:0010883	regulation of lipid storage	BP	1.53342e-05	2.32365
component_5	Kidney	GO:0035633	maintenance of blood-brain barrier	BP	0.00701484	2.32325
component_5	Kidney	GO:0016049	cell growth	BP	0.000257954	2.32308
component_5	Kidney	GO:0048588	developmental cell growth	BP	0.000257954	2.32308
component_5	Kidney	GO:0006664	glycolipid metabolic process	BP	0.00410966	2.32213
component_5	Kidney	GO:0018107	peptidyl-threonine phosphorylation	BP	0.0042013	2.3155
component_5	Kidney	GO:0043542	endothelial cell migration	BP	8.99377e-05	2.30536
component_5	Kidney	GO:0006366	transcription by RNA polymerase II	BP	5.21517e-07	2.30498
component_5	Kidney	GO:0005548	phospholipid transporter activity	MF	0.000343496	2.28754
component_5	Kidney	GO:0048514	blood vessel morphogenesis	BP	1.91077e-05	2.28432
component_5	Kidney	GO:0016922	nuclear receptor binding	MF	5.07473e-05	2.26811
component_5	Kidney	GO:1904375	regulation of protein localization to cell periphery	BP	7.18298e-05	2.23694
component_5	Kidney	GO:0031234	extrinsic component of cytoplasmic side of plasma membrane	CC	0.00180783	2.23434
component_5	Kidney	GO:0043225	ATPase-coupled inorganic anion transmembrane transporter activity	MF	0.00677654	2.23359
component_5	Kidney	GO:0035306	positive regulation of dephosphorylation	BP	0.000417571	2.2295
component_5	Kidney	GO:0097035	regulation of membrane lipid distribution	BP	0.00626444	2.22746
component_5	Kidney	GO:0050431	transforming growth factor beta binding	MF	0.00368074	2.22534
component_5	Kidney	GO:0019208	phosphatase regulator activity	MF	0.000270552	2.21893
component_5	Kidney	GO:0018394	peptidyl-lysine acetylation	BP	0.00114905	2.21789
component_5	Kidney	GO:0006475	internal protein amino acid acetylation	BP	0.00114905	2.21789
component_5	Kidney	GO:0016573	histone acetylation	BP	0.00114905	2.21789
component_5	Kidney	GO:0018393	internal peptidyl-lysine acetylation	BP	0.00114905	2.21789
component_5	Kidney	GO:0008307	structural constituent of muscle	MF	0.000223895	2.2112
component_5	Kidney	GO:0007423	sensory organ development	BP	0.00120454	2.20884
component_5	Kidney	GO:0098858	actin-based cell projection	CC	3.05161e-07	2.20595
component_5	Kidney	GO:0046488	phosphatidylinositol metabolic process	BP	3.37502e-06	2.2056
component_5	Kidney	GO:0071103	DNA conformation change	BP	0.0057554	2.20321
component_5	Kidney	GO:1903076	regulation of protein localization to plasma membrane	BP	0.000255711	2.20089
component_5	Kidney	GO:1902493	acetyltransferase complex	CC	0.000288096	2.20071
component_5	Kidney	GO:0031248	protein acetyltransferase complex	CC	0.000288096	2.20071
component_5	Kidney	GO:0048844	artery morphogenesis	BP	0.00354462	2.1995
component_5	Kidney	GO:0007179	transforming growth factor beta receptor signaling pathway	BP	0.000441275	2.1949
component_5	Kidney	GO:0035023	regulation of Rho protein signal transduction	BP	0.000123152	2.19411
component_5	Kidney	GO:0006351	transcription, DNA-templated	BP	8.16195e-09	2.19029
component_5	Kidney	GO:0097659	nucleic acid-templated transcription	BP	8.16195e-09	2.19029
component_5	Kidney	GO:0099023	vesicle tethering complex	CC	0.00219842	2.18284
component_5	Kidney	GO:0035307	positive regulation of protein dephosphorylation	BP	0.00380163	2.17854
component_5	Kidney	GO:0019888	protein phosphatase regulator activity	MF	0.000851312	2.17544
component_5	Kidney	GO:0035584	calcium-mediated signaling using intracellular calcium source	BP	0.00390556	2.17282
component_5	Kidney	GO:0019903	protein phosphatase binding	MF	0.000143665	2.16985
component_5	Kidney	GO:0051492	regulation of stress fiber assembly	BP	6.68539e-05	2.15522
component_5	Kidney	GO:0045746	negative regulation of Notch signaling pathway	BP	0.00685191	2.15387
component_5	Kidney	GO:0110020	regulation of actomyosin structure organization	BP	7.15708e-05	2.14263
component_5	Kidney	GO:0035987	endodermal cell differentiation	BP	0.0046128	2.13572
component_5	Kidney	GO:0010631	epithelial cell migration	BP	7.55368e-05	2.13338
component_5	Kidney	GO:0032774	RNA biosynthetic process	BP	2.42901e-09	2.13157
component_5	Kidney	GO:0001568	blood vessel development	BP	0.000629072	2.12542
component_5	Kidney	GO:0005776	autophagosome	CC	0.00772197	2.11472
component_5	Kidney	GO:0051056	regulation of small GTPase mediated signal transduction	BP	4.15309e-11	2.08947
component_5	Kidney	GO:0031362	anchored component of external side of plasma membrane	CC	0.00472512	2.08928
component_5	Kidney	GO:0055010	ventricular cardiac muscle tissue morphogenesis	BP	0.00312899	2.08599
component_5	Kidney	GO:0006661	phosphatidylinositol biosynthetic process	BP	0.000255711	2.07962
component_5	Kidney	GO:0032231	regulation of actin filament bundle assembly	BP	6.70895e-05	2.0716
component_5	Kidney	GO:0019902	phosphatase binding	MF	1.66375e-05	2.06687
component_5	Kidney	GO:0008654	phospholipid biosynthetic process	BP	8.03006e-07	2.06117
component_5	Kidney	GO:0051057	positive regulation of small GTPase mediated signal transduction	BP	0.00372921	2.05209
component_5	Kidney	GO:0046578	regulation of Ras protein signal transduction	BP	0.000136455	2.05144
component_5	Kidney	GO:0034654	nucleobase-containing compound biosynthetic process	BP	4.77171e-13	2.04688
component_5	Kidney	GO:0003713	transcription coactivator activity	MF	4.64502e-06	2.04308
component_5	Kidney	GO:0005811	lipid droplet	CC	0.000108627	2.0414
component_5	Kidney	GO:0001667	ameboidal-type cell migration	BP	5.69143e-06	2.03562
component_5	Kidney	GO:0051489	regulation of filopodium assembly	BP	0.00352518	2.03382
component_5	Kidney	GO:0005096	GTPase activator activity	MF	7.24997e-07	2.02274
component_5	Kidney	GO:0043543	protein acylation	BP	0.00057984	2.01498
component_5	Kidney	GO:0008168	methyltransferase activity	MF	0.00282318	2.01165
component_5	Kidney	GO:0046474	glycerophospholipid biosynthetic process	BP	1.42955e-05	1.99886
component_5	Kidney	GO:0046658	anchored component of plasma membrane	CC	0.000878855	1.99545
component_5	Kidney	GO:0045017	glycerolipid biosynthetic process	BP	5.9209e-06	1.99312
component_5	Kidney	GO:0035091	phosphatidylinositol binding	MF	3.73136e-06	1.99293
component_5	Kidney	GO:0008593	regulation of Notch signaling pathway	BP	0.00149484	1.99293
component_5	Kidney	GO:0019897	extrinsic component of plasma membrane	CC	0.000893378	1.99084
component_5	Kidney	GO:0031032	actomyosin structure organization	BP	0.00104159	1.9868
component_5	Kidney	GO:0001221	transcription coregulator binding	MF	0.00101029	1.98163
component_5	Kidney	GO:0030863	cortical cytoskeleton	CC	0.0061338	1.9807
component_5	Kidney	GO:0031668	cellular response to extracellular stimulus	BP	3.82339e-05	1.97539
component_5	Kidney	GO:0017015	regulation of transforming growth factor beta receptor signaling pathway	BP	0.00038123	1.97432
component_5	Kidney	GO:0006473	protein acetylation	BP	0.00179007	1.96441
component_5	Kidney	GO:0035304	regulation of protein dephosphorylation	BP	0.0042013	1.96436
component_5	Kidney	GO:0060271	cilium assembly	BP	7.80619e-05	1.96302
component_5	Kidney	GO:0015629	actin cytoskeleton	CC	1.26833e-07	1.95969
component_5	Kidney	GO:0046777	protein autophosphorylation	BP	6.77546e-05	1.95885
component_5	Kidney	GO:0006909	phagocytosis	BP	0.00263474	1.95468
component_5	Kidney	GO:0007264	small GTPase mediated signal transduction	BP	0.000207687	1.95054
component_5	Kidney	GO:0090407	organophosphate biosynthetic process	BP	2.42901e-09	1.94441
component_5	Kidney	GO:0031669	cellular response to nutrient levels	BP	0.000167856	1.93792
component_5	Kidney	GO:0016607	nuclear speck	CC	1.46884e-07	1.93576
component_5	Kidney	GO:0050770	regulation of axonogenesis	BP	0.000188826	1.93528
component_5	Kidney	GO:1905477	positive regulation of protein localization to membrane	BP	0.00480169	1.93493
component_5	Kidney	GO:1903844	regulation of cellular response to transforming growth factor beta stimulus	BP	0.000503189	1.93148
component_5	Kidney	GO:0006644	phospholipid metabolic process	BP	8.28474e-08	1.92899
component_5	Kidney	GO:0005770	late endosome	CC	0.000385993	1.92457
component_5	Kidney	GO:0060589	nucleoside-triphosphatase regulator activity	MF	1.59024e-10	1.92311
component_5	Kidney	GO:0030695	GTPase regulator activity	MF	1.59024e-10	1.92311
component_5	Kidney	GO:0007399	nervous system development	BP	9.90827e-09	1.91669
component_5	Kidney	GO:0009991	response to extracellular stimulus	BP	3.90671e-06	1.91633
component_5	Kidney	GO:0007265	Ras protein signal transduction	BP	0.000606778	1.90936
component_5	Kidney	GO:0018108	peptidyl-tyrosine phosphorylation	BP	0.00325916	1.90897
component_5	Kidney	GO:0018212	peptidyl-tyrosine modification	BP	0.00325916	1.90897
component_5	Kidney	GO:0005085	guanyl-nucleotide exchange factor activity	MF	0.000223895	1.905
component_5	Kidney	GO:0060411	cardiac septum morphogenesis	BP	0.00115476	1.90392
component_5	Kidney	GO:0018130	heterocycle biosynthetic process	BP	2.59445e-12	1.90051
component_5	Kidney	GO:0007178	transmembrane receptor protein serine/threonine kinase signaling pathway	BP	0.000783351	1.89986
component_5	Kidney	GO:1905475	regulation of protein localization to membrane	BP	8.74629e-05	1.89384
component_5	Kidney	GO:0048193	Golgi vesicle transport	BP	8.11632e-06	1.88842
component_5	Kidney	GO:0031667	response to nutrient levels	BP	1.21407e-05	1.88711
component_5	Kidney	GO:0005923	bicellular tight junction	CC	0.00341645	1.87474
component_5	Kidney	GO:0015914	phospholipid transport	BP	0.00510711	1.87199
component_5	Kidney	GO:0051494	negative regulation of cytoskeleton organization	BP	0.000546436	1.86137
component_5	Kidney	GO:0030020	extracellular matrix structural constituent conferring tensile strength	MF	0.00927164	1.86001
component_5	Kidney	GO:0008360	regulation of cell shape	BP	0.000905143	1.85834
component_5	Kidney	GO:0005667	transcription regulator complex	CC	6.3068e-08	1.8559
component_5	Kidney	GO:0016604	nuclear body	CC	1.26266e-12	1.85508
component_5	Kidney	GO:0048511	rhythmic process	BP	0.00564522	1.85114
component_5	Kidney	GO:0006650	glycerophospholipid metabolic process	BP	4.07605e-06	1.84715
component_5	Kidney	GO:0070160	tight junction	CC	0.00316484	1.84694
component_5	Kidney	GO:0042594	response to starvation	BP	0.00239798	1.8453
component_5	Kidney	GO:0009267	cellular response to starvation	BP	0.00532815	1.84215
component_5	Kidney	GO:1990782	protein tyrosine kinase binding	MF	0.00067789	1.84121
component_5	Kidney	GO:0060491	regulation of cell projection assembly	BP	0.000616768	1.8407
component_5	Kidney	GO:0120032	regulation of plasma membrane bounded cell projection assembly	BP	0.000616768	1.8407
component_5	Kidney	GO:0048871	multicellular organismal homeostasis	BP	0.00134851	1.83699
component_5	Kidney	GO:0005802	trans-Golgi network	CC	8.82508e-05	1.83686
component_5	Kidney	GO:0090575	RNA polymerase II transcription regulator complex	CC	0.000310182	1.8238
component_5	Kidney	GO:0051276	chromosome organization	BP	0.00057984	1.81983
component_5	Kidney	GO:0004674	protein serine/threonine kinase activity	MF	5.22793e-07	1.81833
component_5	Kidney	GO:0010639	negative regulation of organelle organization	BP	2.18456e-06	1.81718
component_5	Kidney	GO:1901362	organic cyclic compound biosynthetic process	BP	4.3453e-12	1.80906
component_5	Kidney	GO:0000209	protein polyubiquitination	BP	0.000629072	1.80206
component_5	Kidney	GO:0019904	protein domain specific binding	MF	9.33758e-10	1.80102
component_5	Kidney	GO:0005516	calmodulin binding	MF	0.00548369	1.79485
component_5	Kidney	GO:0035303	regulation of dephosphorylation	BP	0.0059668	1.79364
component_5	Kidney	GO:0044782	cilium organization	BP	0.00080888	1.79249
component_5	Kidney	GO:0009100	glycoprotein metabolic process	BP	0.00375793	1.79222
component_5	Kidney	GO:0007229	integrin-mediated signaling pathway	BP	0.00236736	1.78765
component_5	Kidney	GO:0050769	positive regulation of neurogenesis	BP	0.00148698	1.78446
component_5	Kidney	GO:0019438	aromatic compound biosynthetic process	BP	9.9388e-10	1.78426
component_5	Kidney	GO:0110053	regulation of actin filament organization	BP	2.54749e-05	1.78091
component_5	Kidney	GO:1901653	cellular response to peptide	BP	0.00149255	1.76528
component_5	Kidney	GO:0006643	membrane lipid metabolic process	BP	0.00924832	1.76358
component_5	Kidney	GO:0016773	phosphotransferase activity, alcohol group as acceptor	MF	8.80436e-13	1.76355
component_5	Kidney	GO:0005794	Golgi apparatus	CC	1.42755e-16	1.76334
component_5	Kidney	GO:0005730	nucleolus	CC	3.3366e-13	1.7627
component_5	Kidney	GO:0003712	transcription coregulator activity	MF	9.49393e-07	1.76203
component_5	Kidney	GO:0046982	protein heterodimerization activity	MF	0.000223895	1.76118
component_5	Kidney	GO:0019898	extrinsic component of membrane	CC	5.85887e-05	1.75329
component_5	Kidney	GO:0032970	regulation of actin filament-based process	BP	2.1736e-07	1.74999
component_5	Kidney	GO:1901888	regulation of cell junction assembly	BP	0.000167856	1.74979
component_5	Kidney	GO:1904035	regulation of epithelial cell apoptotic process	BP	0.00976229	1.74789
component_5	Kidney	GO:0006468	protein phosphorylation	BP	7.94739e-11	1.74789
component_5	Kidney	GO:0007156	homophilic cell adhesion via plasma membrane adhesion molecules	BP	0.00149484	1.74688
component_5	Kidney	GO:0031984	organelle subcompartment	CC	9.16533e-05	1.74665
component_5	Kidney	GO:1901988	negative regulation of cell cycle phase transition	BP	0.00243954	1.74524
component_5	Kidney	GO:1990234	transferase complex	CC	6.3068e-08	1.74519
component_5	Kidney	GO:0035239	tube morphogenesis	BP	0.0003094	1.74445
component_5	Kidney	GO:0008047	enzyme activator activity	MF	2.02674e-09	1.74348
component_5	Kidney	GO:0006915	apoptotic process	BP	1.13944e-05	1.74204
component_5	Kidney	GO:0071496	cellular response to external stimulus	BP	0.00068824	1.74127
component_5	Kidney	GO:0004672	protein kinase activity	MF	3.85892e-10	1.74088
component_5	Kidney	GO:0050767	regulation of neurogenesis	BP	3.04562e-05	1.73977
component_5	Kidney	GO:0061695	transferase complex, transferring phosphorus-containing groups	CC	0.00503671	1.73918
component_5	Kidney	GO:0019199	transmembrane receptor protein kinase activity	MF	0.00177987	1.73918
component_5	Kidney	GO:0010948	negative regulation of cell cycle process	BP	0.000643766	1.73582
component_5	Kidney	GO:0051015	actin filament binding	MF	0.000223895	1.73565
component_5	Kidney	GO:0120031	plasma membrane bounded cell projection assembly	BP	0.000157845	1.73555
component_5	Kidney	GO:0030036	actin cytoskeleton organization	BP	1.67222e-05	1.72994
component_5	Kidney	GO:0070925	organelle assembly	BP	8.7459e-06	1.72962
component_5	Kidney	GO:0045229	external encapsulating structure organization	BP	2.44973e-06	1.72937
component_5	Kidney	GO:0030198	extracellular matrix organization	BP	2.44973e-06	1.72937
component_5	Kidney	GO:0016301	kinase activity	MF	8.80436e-13	1.72899
component_5	Kidney	GO:0016772	transferase activity, transferring phosphorus-containing groups	MF	7.81519e-14	1.72863
component_5	Kidney	GO:1901987	regulation of cell cycle phase transition	BP	2.58944e-05	1.72381
component_5	Kidney	GO:0018105	peptidyl-serine phosphorylation	BP	0.0044529	1.71973
component_5	Kidney	GO:0018209	peptidyl-serine modification	BP	0.0044529	1.71973
component_5	Kidney	GO:0016310	phosphorylation	BP	3.85382e-11	1.71862
component_5	Kidney	GO:1902806	regulation of cell cycle G1/S phase transition	BP	0.00214745	1.71797
component_5	Kidney	GO:0019637	organophosphate metabolic process	BP	9.21574e-09	1.71794
component_5	Kidney	GO:0034660	ncRNA metabolic process	BP	0.000145428	1.71775
component_5	Kidney	GO:1905954	positive regulation of lipid localization	BP	0.00956587	1.70972
component_5	Kidney	GO:0030029	actin filament-based process	BP	4.54135e-06	1.69983
component_5	Kidney	GO:0032956	regulation of actin cytoskeleton organization	BP	1.17704e-05	1.69867
component_5	Kidney	GO:0140535	intracellular protein-containing complex	CC	3.75096e-07	1.6985
component_5	Kidney	GO:0016070	RNA metabolic process	BP	1.09352e-10	1.69401
component_5	Kidney	GO:0006396	RNA processing	BP	3.79311e-05	1.69298
component_5	Kidney	GO:0043062	extracellular structure organization	BP	6.47173e-06	1.69208
component_5	Kidney	GO:0006796	phosphate-containing compound metabolic process	BP	6.62266e-21	1.69151
component_5	Kidney	GO:1903829	positive regulation of protein localization	BP	1.55892e-06	1.69105
component_5	Kidney	GO:0070647	protein modification by small protein conjugation or removal	BP	1.9977e-07	1.68561
component_5	Kidney	GO:0006793	phosphorus metabolic process	BP	9.31323e-21	1.68311
component_5	Kidney	GO:0098857	membrane microdomain	CC	5.8166e-06	1.68242
component_5	Kidney	GO:0045121	membrane raft	CC	5.8166e-06	1.68242
component_5	Kidney	GO:0046486	glycerolipid metabolic process	BP	5.02963e-05	1.67703
component_5	Kidney	GO:0140513	nuclear protein-containing complex	CC	2.21112e-11	1.67142
component_5	Kidney	GO:0045296	cadherin binding	MF	6.64606e-06	1.66916
component_5	Kidney	GO:0098791	Golgi apparatus subcompartment	CC	0.00131779	1.66857
component_5	Kidney	GO:0008610	lipid biosynthetic process	BP	2.52291e-07	1.66639
component_5	Kidney	GO:0051962	positive regulation of nervous system development	BP	0.00148802	1.66632
component_5	Kidney	GO:0043412	macromolecule modification	BP	6.18324e-30	1.66599
component_5	Kidney	GO:0010720	positive regulation of cell development	BP	0.00149255	1.66481
component_5	Kidney	GO:0001936	regulation of endothelial cell proliferation	BP	0.00083762	1.66451
component_5	Kidney	GO:0032446	protein modification by small protein conjugation	BP	2.36748e-06	1.6613
component_5	Kidney	GO:0006464	cellular protein modification process	BP	1.0734e-27	1.66079
component_5	Kidney	GO:0036211	protein modification process	BP	1.0734e-27	1.66079
component_5	Kidney	GO:0031344	regulation of cell projection organization	BP	3.52914e-08	1.65743
component_5	Kidney	GO:1901990	regulation of mitotic cell cycle phase transition	BP	0.000733164	1.65449
component_5	Kidney	GO:0005912	adherens junction	CC	0.0032418	1.65355
component_5	Kidney	GO:1905952	regulation of lipid localization	BP	0.00358192	1.6535
component_5	Kidney	GO:0005768	endosome	CC	6.10762e-09	1.65315
component_5	Kidney	GO:0032409	regulation of transporter activity	BP	3.37728e-05	1.65227
component_5	Kidney	GO:0004713	protein tyrosine kinase activity	MF	0.00447638	1.64804
component_5	Kidney	GO:0005911	cell-cell junction	CC	4.36731e-08	1.64457
component_5	Kidney	GO:0044087	regulation of cellular component biogenesis	BP	1.33609e-12	1.64291
component_5	Kidney	GO:0045786	negative regulation of cell cycle	BP	0.00130281	1.64207
component_5	Kidney	GO:0120035	regulation of plasma membrane bounded cell projection organization	BP	1.20981e-07	1.64144
component_5	Kidney	GO:0016567	protein ubiquitination	BP	1.49077e-05	1.64084
component_5	Kidney	GO:0030234	enzyme regulator activity	MF	4.08301e-16	1.63918
component_5	Kidney	GO:1902904	negative regulation of supramolecular fiber organization	BP	0.00906676	1.63686
component_5	Kidney	GO:0016740	transferase activity	MF	6.19033e-26	1.63573
component_5	Kidney	GO:0016757	glycosyltransferase activity	MF	0.00447544	1.63406
component_5	Kidney	GO:0048731	system development	BP	2.77389e-10	1.63402
component_5	Kidney	GO:0030336	negative regulation of cell migration	BP	1.98478e-05	1.62648
component_5	Kidney	GO:0031965	nuclear membrane	CC	0.00503671	1.62645
component_5	Kidney	GO:0005925	focal adhesion	CC	1.82112e-07	1.62543
component_5	Kidney	GO:0019838	growth factor binding	MF	0.000585451	1.6243
component_5	Kidney	GO:2000146	negative regulation of cell motility	BP	1.35146e-05	1.62244
component_5	Kidney	GO:0032880	regulation of protein localization	BP	1.25365e-09	1.62144
component_5	Kidney	GO:0040013	negative regulation of locomotion	BP	2.96586e-06	1.62086
component_5	Kidney	GO:0030055	cell-substrate junction	CC	1.14058e-07	1.62021
component_5	Kidney	GO:0012501	programmed cell death	BP	0.000203493	1.61909
component_5	Kidney	GO:0003779	actin binding	MF	3.36248e-05	1.61448
component_5	Kidney	GO:0022898	regulation of transmembrane transporter activity	BP	0.000358357	1.60836
component_5	Kidney	GO:0003018	vascular process in circulatory system	BP	0.000307579	1.6066
component_5	Kidney	GO:0022411	cellular component disassembly	BP	0.0078578	1.60656
component_5	Kidney	GO:0008134	transcription factor binding	MF	1.55086e-06	1.6062
component_5	Kidney	GO:0051960	regulation of nervous system development	BP	0.000174726	1.6031
component_5	Kidney	GO:0071417	cellular response to organonitrogen compound	BP	0.000473848	1.60273
component_5	Kidney	GO:0033365	protein localization to organelle	BP	5.00001e-05	1.6023
component_5	Kidney	GO:0060284	regulation of cell development	BP	6.48526e-05	1.60001
component_5	Kidney	GO:0061629	RNA polymerase II-specific DNA-binding transcription factor binding	MF	0.00198735	1.59879
component_5	Kidney	GO:0031346	positive regulation of cell projection organization	BP	0.00104013	1.59643
component_5	Kidney	GO:0070161	anchoring junction	CC	3.69379e-13	1.5948
component_5	Kidney	GO:0044267	cellular protein metabolic process	BP	9.09064e-25	1.59179
component_5	Kidney	GO:0051493	regulation of cytoskeleton organization	BP	2.14996e-06	1.59132
component_5	Kidney	GO:0018193	peptidyl-amino acid modification	BP	1.55468e-07	1.59097
component_5	Kidney	GO:0005654	nucleoplasm	CC	2.92257e-35	1.58751
component_5	Kidney	GO:0042326	negative regulation of phosphorylation	BP	0.00010965	1.58591
component_5	Kidney	GO:0032870	cellular response to hormone stimulus	BP	0.00410966	1.58211
component_5	Kidney	GO:1901699	cellular response to nitrogen compound	BP	0.000423089	1.58167
component_5	Kidney	GO:0032412	regulation of ion transmembrane transporter activity	BP	0.000791234	1.58112
component_5	Kidney	GO:0090092	regulation of transmembrane receptor protein serine/threonine kinase signaling pathway	BP	0.00101323	1.5811
component_5	Kidney	GO:0022604	regulation of cell morphogenesis	BP	0.000932882	1.58023
component_5	Kidney	GO:0051129	negative regulation of cellular component organization	BP	2.65434e-08	1.57911
component_5	Kidney	GO:0090304	nucleic acid metabolic process	BP	9.415e-11	1.57911
component_5	Kidney	GO:0070727	cellular macromolecule localization	BP	1.26551e-08	1.57739
component_5	Kidney	GO:0034613	cellular protein localization	BP	1.26551e-08	1.57739
component_5	Kidney	GO:0005543	phospholipid binding	MF	8.75117e-05	1.57227
component_5	Kidney	GO:0042578	phosphoric ester hydrolase activity	MF	0.000607686	1.5719
component_5	Kidney	GO:0007015	actin filament organization	BP	0.00221996	1.57067
component_5	Kidney	GO:1904951	positive regulation of establishment of protein localization	BP	0.00224862	1.56721
component_5	Kidney	GO:0120036	plasma membrane bounded cell projection organization	BP	1.96878e-05	1.56669
component_5	Kidney	GO:0019900	kinase binding	MF	1.12524e-07	1.56636
component_5	Kidney	GO:0019787	ubiquitin-like protein transferase activity	MF	0.000185775	1.56616
component_5	Kidney	GO:0034762	regulation of transmembrane transport	BP	1.16085e-05	1.56524
component_5	Kidney	GO:0016324	apical plasma membrane	CC	0.000319088	1.56443
component_5	Kidney	GO:0072657	protein localization to membrane	BP	0.00127255	1.56412
component_5	Kidney	GO:0050839	cell adhesion molecule binding	MF	2.69147e-09	1.56267
component_5	Kidney	GO:0030031	cell projection assembly	BP	0.00332232	1.56206
component_5	Kidney	GO:0051641	cellular localization	BP	4.20732e-16	1.56153
component_5	Kidney	GO:0001525	angiogenesis	BP	0.0042013	1.56128
component_5	Kidney	GO:0061659	ubiquitin-like protein ligase activity	MF	0.0026731	1.56118
component_5	Kidney	GO:2000145	regulation of cell motility	BP	1.29675e-13	1.56111
component_5	Kidney	GO:0051271	negative regulation of cellular component movement	BP	6.68539e-05	1.55826
component_5	Kidney	GO:0046483	heterocycle metabolic process	BP	1.28434e-15	1.55698
component_5	Kidney	GO:0035556	intracellular signal transduction	BP	2.31557e-13	1.55436
component_5	Kidney	GO:0051222	positive regulation of protein transport	BP	0.0032288	1.55309
component_5	Kidney	GO:0006139	nucleobase-containing compound metabolic process	BP	5.47093e-13	1.55295
component_5	Kidney	GO:0090287	regulation of cellular response to growth factor stimulus	BP	0.00114905	1.55253
component_5	Kidney	GO:0010975	regulation of neuron projection development	BP	0.000390716	1.55183
component_5	Kidney	GO:1902903	regulation of supramolecular fiber organization	BP	0.000464543	1.54942
component_5	Kidney	GO:0051270	regulation of cellular component movement	BP	6.25344e-14	1.54939
component_5	Kidney	GO:0048468	cell development	BP	0.00017654	1.54931
component_5	Kidney	GO:0051128	regulation of cellular component organization	BP	3.62917e-23	1.54905
component_5	Kidney	GO:0061630	ubiquitin protein ligase activity	MF	0.00445608	1.54733
component_5	Kidney	GO:0008104	protein localization	BP	3.85382e-11	1.54582
component_5	Kidney	GO:0060090	molecular adaptor activity	MF	0.0018373	1.54423
component_5	Kidney	GO:0044255	cellular lipid metabolic process	BP	1.03566e-07	1.54347
component_5	Kidney	GO:0030334	regulation of cell migration	BP	2.29668e-12	1.54251
component_5	Kidney	GO:0003682	chromatin binding	MF	0.00649708	1.54228
component_5	Kidney	GO:0033036	macromolecule localization	BP	7.04442e-11	1.53721
component_5	Kidney	GO:0060341	regulation of cellular localization	BP	6.67091e-07	1.5371
component_5	Kidney	GO:0040012	regulation of locomotion	BP	6.14178e-13	1.5366
component_5	Kidney	GO:0007167	enzyme linked receptor protein signaling pathway	BP	1.18206e-06	1.53593
component_5	Kidney	GO:0019901	protein kinase binding	MF	2.7723e-06	1.53584
component_5	Kidney	GO:0044260	cellular macromolecule metabolic process	BP	8.56224e-29	1.53515
component_5	Kidney	GO:0030674	protein-macromolecule adaptor activity	MF	0.00466904	1.53491
component_5	Kidney	GO:0031400	negative regulation of protein modification process	BP	7.01665e-05	1.53459
component_5	Kidney	GO:0009653	anatomical structure morphogenesis	BP	5.2437e-12	1.53292
component_5	Kidney	GO:0001933	negative regulation of protein phosphorylation	BP	0.000846974	1.53262
component_5	Kidney	GO:1901701	cellular response to oxygen-containing compound	BP	8.01305e-07	1.53238
component_5	Kidney	GO:0043232	intracellular non-membrane-bounded organelle	CC	7.53301e-23	1.53189
component_5	Kidney	GO:0043228	non-membrane-bounded organelle	CC	7.53301e-23	1.53189
component_5	Kidney	GO:0044271	cellular nitrogen compound biosynthetic process	BP	6.32502e-07	1.53091
component_5	Kidney	GO:0030054	cell junction	CC	1.90391e-15	1.52519
component_5	Kidney	GO:0003013	circulatory system process	BP	0.000743902	1.52498
component_5	Kidney	GO:0016192	vesicle-mediated transport	BP	2.93197e-10	1.52445
component_5	Kidney	GO:0045944	positive regulation of transcription by RNA polymerase II	BP	8.10027e-09	1.52419
component_5	Kidney	GO:0043065	positive regulation of apoptotic process	BP	8.64115e-05	1.52418
component_5	Kidney	GO:0046907	intracellular transport	BP	1.9773e-07	1.52199
component_5	Kidney	GO:0008289	lipid binding	MF	5.85705e-06	1.5218
component_5	Kidney	GO:0033043	regulation of organelle organization	BP	7.1132e-10	1.52093
component_5	Kidney	GO:0019899	enzyme binding	MF	4.68047e-18	1.51669
component_5	Kidney	GO:0051668	localization within membrane	BP	0.00106883	1.5141
component_5	Kidney	GO:0140096	catalytic activity, acting on a protein	MF	1.28819e-18	1.51204
component_5	Kidney	GO:0014070	response to organic cyclic compound	BP	0.00402047	1.51175
component_5	Kidney	GO:0051726	regulation of cell cycle	BP	1.68229e-07	1.51053
component_5	Kidney	GO:0034765	regulation of ion transmembrane transport	BP	0.000468216	1.51049
component_5	Kidney	GO:0098742	cell-cell adhesion via plasma-membrane adhesion molecules	BP	0.000588088	1.50958
component_5	Kidney	GO:0022603	regulation of anatomical structure morphogenesis	BP	7.26944e-09	1.50679
component_5	Kidney	GO:0004842	ubiquitin-protein transferase activity	MF	0.0018373	1.50563
component_5	Kidney	GO:0044089	positive regulation of cellular component biogenesis	BP	0.000203493	1.50237
component_5	Kidney	GO:0043254	regulation of protein-containing complex assembly	BP	0.00151554	1.5018
component_5	Kidney	GO:0006629	lipid metabolic process	BP	4.66404e-08	1.50178
component_5	Kidney	GO:0007610	behavior	BP	0.00760198	1.49905
component_5	Kidney	GO:0005813	centrosome	CC	0.000847912	1.49892
component_5	Kidney	GO:0005856	cytoskeleton	CC	2.8656e-07	1.49822
component_5	Kidney	GO:1901135	carbohydrate derivative metabolic process	BP	0.000211382	1.49655
component_5	Kidney	GO:0045936	negative regulation of phosphate metabolic process	BP	0.000464751	1.49548
component_5	Kidney	GO:0010563	negative regulation of phosphorus metabolic process	BP	0.000464751	1.49548
component_5	Kidney	GO:0090066	regulation of anatomical structure size	BP	0.00487142	1.49438
component_5	Kidney	GO:1901360	organic cyclic compound metabolic process	BP	6.13094e-14	1.49054
component_5	Kidney	GO:1901576	organic substance biosynthetic process	BP	3.59926e-11	1.48568
component_5	Kidney	GO:0045597	positive regulation of cell differentiation	BP	1.32558e-06	1.48542
component_5	Kidney	GO:1902494	catalytic complex	CC	7.55274e-08	1.48411
component_5	Kidney	GO:0006725	cellular aromatic compound metabolic process	BP	5.2437e-12	1.48331
component_5	Kidney	GO:0010564	regulation of cell cycle process	BP	0.000105196	1.48316
component_5	Kidney	GO:0007346	regulation of mitotic cell cycle	BP	0.000950771	1.48222
component_5	Kidney	GO:0051345	positive regulation of hydrolase activity	BP	4.44358e-05	1.48152
component_5	Kidney	GO:0044877	protein-containing complex binding	MF	6.00929e-10	1.48112
component_5	Kidney	GO:0005829	cytosol	CC	1.53654e-41	1.481
component_5	Kidney	GO:0044238	primary metabolic process	BP	7.09767e-41	1.48073
[truncated: 372,001+ more rows]
