# Supplementary material for: A unified analysis of atlas single-cell data
Source: HighWire-hosted journal article supplement (doi:10.1101/gr.279631.124), 2025-02-18
Supplement: Supplemental_Table_S2.xlsx [file Supplemental_Table_S2.xlsx]

## Sheet: Table S2
Table S2: Examples of GO enrichment not directly related to the primary functions of the tissues.
component #	Tissues	GO	name	branch	p fdr bh	fold change	Comment
component_357	Large Intestine	GO:0031344	regulation of cell projection organization	BP	9e-09	2.57634	Related to the formation of microvilli in absorptive cells of the large intestine [PMID: 27381224].
component_94	Kidney	GO:0019226	transmission of nerve impulse	BP	0.0011009	6.15584	Associated with the cross-talk between the nervous system and the kidney in the regulation of renal blood flow and body homeostasis [PMID: 32001065].
component_432	Kidney	GO:0006937	regulation of muscle contraction	BP	3.74e-14	6.25167	Primarily involves smooth muscle cells in renal blood vessels which ensure the proper regulation of blood flow and pressure in the kidney [PMID: 24066938].
component_463	Thymus	GO:0010959	regulation of metal ion transport	BP	0.00062211	2.39826	Related to T cell development and maturation [PMID: 37705981]
component_853	Heart	GO:2000145	regulation of cell motility	BP	2.38e-08	3.81314	Related to tissue repair or migration of immune cells [PMID: 15285789, 17383544]
component_898	Lung	GO:2000145	regulation of cell motility	BP	1.85e-07	4.25847	Related to tissue repair after injury [PMID: 26906733]
component_276	Lung	GO:0099111	microtubule-based transport	BP	1.05e-05	3.38652	Asscoiated with cilia of the respiratory epithelium, which are hair-like structures that line the airways and are responsible for moving mucus, trapped particles, and pathogens out of the lungs [PMID: 27864314].
