# Supplementary material for: A unified analysis of atlas single-cell data
Source: HighWire-hosted journal article supplement (doi:10.1101/gr.279631.124), 2025-02-18
Supplement: Supplemental_Table_S3.xlsx [file Supplemental_Table_S3.xlsx]

## Sheet: Table S3
Table S3: Support data for Figure 4D.
component #	top 3 celltype	GO	name	branch	p fdr bh	child term of
component_0	Mesothelial_cells	GO:0043433	negative regulation of DNA-binding transcription factor activity	BP	5.55e-06	GO:0009889:regulation of biosynthetic process
component_2	Lymphatic_endothelial_cells	GO:0006281	DNA repair	BP	4.34e-06	GO:0006974:cellular response to DNA damage stimulus
component_6	Mesothelial_cells	GO:0006355	regulation of transcription, DNA-templated	BP	4.93e-06	GO:0009889:regulation of biosynthetic process
component_8	Myeloid_cells	GO:0033045	regulation of sister chromatid segregation	BP	9.12e-06	GO:0051726:regulation of cell cycle
component_9	Lymphatic_endothelial_cells	GO:1902808	positive regulation of cell cycle G1/S phase transition	BP	4.81e-06	GO:0051726:regulation of cell cycle
component_9	Lymphatic_endothelial_cells	GO:1901989	positive regulation of cell cycle phase transition	BP	3.02e-07	GO:0051726:regulation of cell cycle
component_9	Lymphatic_endothelial_cells	GO:0006281	DNA repair	BP	1.44e-06	GO:0006974:cellular response to DNA damage stimulus
component_9	Lymphatic_endothelial_cells	GO:1901987	regulation of cell cycle phase transition	BP	7.64e-09	GO:0051726:regulation of cell cycle
component_9	Lymphatic_endothelial_cells	GO:1901990	regulation of mitotic cell cycle phase transition	BP	1.22e-06	GO:0051726:regulation of cell cycle
component_12	Megakaryocytes	GO:0001764	neuron migration	BP	2.75e-07	GO:0048870:cell motility
component_14	Mesothelial_cells,Epicardial_fat_cells	GO:1901987	regulation of cell cycle phase transition	BP	8.3e-06	GO:0051726:regulation of cell cycle
component_14	Mesothelial_cells,Epicardial_fat_cells	GO:0010564	regulation of cell cycle process	BP	1.17e-08	GO:0051726:regulation of cell cycle
component_14	Mesothelial_cells,Epicardial_fat_cells	GO:0051726	regulation of cell cycle	BP	1.96e-08	GO:0051726:regulation of cell cycle
component_21	Stromal_cells	GO:0008654	phospholipid biosynthetic process	BP	9.48e-08	GO:0044255:cellular lipid metabolic process
component_21	Stromal_cells	GO:0046474	glycerophospholipid biosynthetic process	BP	8.5e-06	GO:0044255:cellular lipid metabolic process
component_21	Stromal_cells	GO:0006644	phospholipid metabolic process	BP	4.01e-06	GO:0044255:cellular lipid metabolic process
component_24	Megakaryocytes	GO:1901990	regulation of mitotic cell cycle phase transition	BP	2.01e-06	GO:0051726:regulation of cell cycle
component_24	Megakaryocytes	GO:1901987	regulation of cell cycle phase transition	BP	9.28e-06	GO:0051726:regulation of cell cycle
component_24	Megakaryocytes	GO:0010564	regulation of cell cycle process	BP	6.27e-09	GO:0051726:regulation of cell cycle
component_24	Megakaryocytes	GO:0051726	regulation of cell cycle	BP	8.35e-09	GO:0051726:regulation of cell cycle
component_25	Myeloid_cells	GO:0033047	regulation of mitotic sister chromatid segregation	BP	1.42e-06	GO:0051726:regulation of cell cycle
component_40	Squamous_epithelial_cells,Corneal_and_conjunctival_epithelial_cells	GO:0010959	regulation of metal ion transport	BP	2.39e-07	GO:0043269:regulation of ion transport
component_56	Skeletal_muscle_cells,ELF3_AGBL2_positive_cells,Cardiomyocytes	GO:2001238	positive regulation of extrinsic apoptotic signaling pathway	BP	4.86e-07	GO:0010646:regulation of cell communication
component_56	Skeletal_muscle_cells,ELF3_AGBL2_positive_cells,Cardiomyocytes	GO:2001238	positive regulation of extrinsic apoptotic signaling pathway	BP	4.86e-07	GO:0009966:regulation of signal transduction
component_60	Stromal_cells,Stellate_cells	GO:0043433	negative regulation of DNA-binding transcription factor activity	BP	5.36e-10	GO:0009889:regulation of biosynthetic process
component_70	Mesothelial_cells,Epicardial_fat_cells	GO:1903507	negative regulation of nucleic acid-templated transcription	BP	1.8e-07	GO:0009889:regulation of biosynthetic process
component_70	Mesothelial_cells,Epicardial_fat_cells	GO:0045892	negative regulation of transcription, DNA-templated	BP	1.8e-07	GO:0009889:regulation of biosynthetic process
component_70	Mesothelial_cells,Epicardial_fat_cells	GO:1902679	negative regulation of RNA biosynthetic process	BP	1.82e-07	GO:0009889:regulation of biosynthetic process
component_80	Schwann_cells	GO:2001222	regulation of neuron migration	BP	7.01e-07	GO:0048870:cell motility
component_81	Astrocytes	GO:2000649	regulation of sodium ion transmembrane transporter activity	BP	6.42e-08	GO:0034765:regulation of ion transmembrane transport
component_81	Astrocytes	GO:2000649	regulation of sodium ion transmembrane transporter activity	BP	6.42e-08	GO:0043269:regulation of ion transport
component_81	Astrocytes	GO:0070509	calcium ion import	BP	1.05e-06	GO:0006816:calcium ion transport
component_81	Astrocytes	GO:1902305	regulation of sodium ion transmembrane transport	BP	2.14e-06	GO:0034765:regulation of ion transmembrane transport
component_81	Astrocytes	GO:1902305	regulation of sodium ion transmembrane transport	BP	2.14e-06	GO:0043269:regulation of ion transport
component_81	Astrocytes	GO:0050922	negative regulation of chemotaxis	BP	2.15e-06	GO:0009605:response to external stimulus
component_86	Skeletal_muscle_cells,Cardiomyocytes,ELF3_AGBL2_positive_cells	GO:0045746	negative regulation of Notch signaling pathway	BP	2.26e-07	GO:0010646:regulation of cell communication
component_86	Skeletal_muscle_cells,Cardiomyocytes,ELF3_AGBL2_positive_cells	GO:0045746	negative regulation of Notch signaling pathway	BP	2.26e-07	GO:0009966:regulation of signal transduction
component_87	Stromal_cells	GO:0060392	negative regulation of SMAD protein signal transduction	BP	7.53e-06	GO:0010646:regulation of cell communication
component_87	Stromal_cells	GO:0060392	negative regulation of SMAD protein signal transduction	BP	7.53e-06	GO:0009966:regulation of signal transduction
component_87	Stromal_cells	GO:0010991	negative regulation of SMAD protein complex assembly	BP	8.4e-06	GO:0010646:regulation of cell communication
component_87	Stromal_cells	GO:0010991	negative regulation of SMAD protein complex assembly	BP	8.4e-06	GO:0009966:regulation of signal transduction
component_87	Stromal_cells	GO:0060394	negative regulation of pathway-restricted SMAD protein phosphorylation	BP	5.2e-07	GO:0010646:regulation of cell communication
component_87	Stromal_cells	GO:0060394	negative regulation of pathway-restricted SMAD protein phosphorylation	BP	5.2e-07	GO:0009966:regulation of signal transduction
component_100	ENS_neurons,Visceral_neurons	GO:0032007	negative regulation of TOR signaling	BP	1.46e-06	GO:0010646:regulation of cell communication
component_100	ENS_neurons,Visceral_neurons	GO:0032007	negative regulation of TOR signaling	BP	1.46e-06	GO:0009966:regulation of signal transduction
component_100	ENS_neurons,Visceral_neurons	GO:1903432	regulation of TORC1 signaling	BP	1.8e-06	GO:0010646:regulation of cell communication
component_100	ENS_neurons,Visceral_neurons	GO:1903432	regulation of TORC1 signaling	BP	1.8e-06	GO:0009966:regulation of signal transduction
component_100	ENS_neurons,Visceral_neurons	GO:0032006	regulation of TOR signaling	BP	1.32e-06	GO:0010646:regulation of cell communication
component_100	ENS_neurons,Visceral_neurons	GO:0032006	regulation of TOR signaling	BP	1.32e-06	GO:0009966:regulation of signal transduction
component_107	Erythroblasts	GO:0150172	regulation of phosphatidylcholine metabolic process	BP	8.22e-09	GO:0044255:cellular lipid metabolic process
component_107	Erythroblasts	GO:0050925	negative regulation of negative chemotaxis	BP	2.01e-07	GO:0009605:response to external stimulus
component_107	Erythroblasts	GO:0070426	positive regulation of nucleotide-binding oligomerization domain containing signaling pathway	BP	1.77e-06	GO:0002682:regulation of immune system process
component_107	Erythroblasts	GO:0070426	positive regulation of nucleotide-binding oligomerization domain containing signaling pathway	BP	1.77e-06	GO:0010646:regulation of cell communication
component_107	Erythroblasts	GO:0070426	positive regulation of nucleotide-binding oligomerization domain containing signaling pathway	BP	1.77e-06	GO:0009966:regulation of signal transduction
component_107	Erythroblasts	GO:0070434	positive regulation of nucleotide-binding oligomerization domain containing 2 signaling pathway	BP	1.77e-06	GO:0002682:regulation of immune system process
component_107	Erythroblasts	GO:0070434	positive regulation of nucleotide-binding oligomerization domain containing 2 signaling pathway	BP	1.77e-06	GO:0010646:regulation of cell communication
component_107	Erythroblasts	GO:0070434	positive regulation of nucleotide-binding oligomerization domain containing 2 signaling pathway	BP	1.77e-06	GO:0009966:regulation of signal transduction
component_107	Erythroblasts	GO:1903265	positive regulation of tumor necrosis factor-mediated signaling pathway	BP	1.77e-06	GO:0010646:regulation of cell communication
component_107	Erythroblasts	GO:1903265	positive regulation of tumor necrosis factor-mediated signaling pathway	BP	1.77e-06	GO:0009966:regulation of signal transduction
component_107	Erythroblasts	GO:0070432	regulation of nucleotide-binding oligomerization domain containing 2 signaling pathway	BP	1.77e-06	GO:0002682:regulation of immune system process
component_107	Erythroblasts	GO:0070432	regulation of nucleotide-binding oligomerization domain containing 2 signaling pathway	BP	1.77e-06	GO:0010646:regulation of cell communication
component_107	Erythroblasts	GO:0070432	regulation of nucleotide-binding oligomerization domain containing 2 signaling pathway	BP	1.77e-06	GO:0009966:regulation of signal transduction
component_107	Erythroblasts	GO:0070424	regulation of nucleotide-binding oligomerization domain containing signaling pathway	BP	1.77e-06	GO:0002682:regulation of immune system process
component_107	Erythroblasts	GO:0070424	regulation of nucleotide-binding oligomerization domain containing signaling pathway	BP	1.77e-06	GO:0010646:regulation of cell communication
component_107	Erythroblasts	GO:0070424	regulation of nucleotide-binding oligomerization domain containing signaling pathway	BP	1.77e-06	GO:0009966:regulation of signal transduction
component_107	Erythroblasts	GO:0090169	regulation of spindle assembly	BP	5.69e-09	GO:0051726:regulation of cell cycle
component_107	Erythroblasts	GO:1901673	regulation of mitotic spindle assembly	BP	5.69e-09	GO:0051726:regulation of cell cycle
component_107	Erythroblasts	GO:0010991	negative regulation of SMAD protein complex assembly	BP	3.51e-07	GO:0010646:regulation of cell communication
component_107	Erythroblasts	GO:0010991	negative regulation of SMAD protein complex assembly	BP	3.51e-07	GO:0009966:regulation of signal transduction
component_115	Smooth_muscle_cells	GO:0006359	regulation of transcription by RNA polymerase III	BP	1.85e-06	GO:0009889:regulation of biosynthetic process
component_115	Smooth_muscle_cells	GO:0045945	positive regulation of transcription by RNA polymerase III	BP	1.85e-06	GO:0009889:regulation of biosynthetic process
component_115	Smooth_muscle_cells	GO:0045746	negative regulation of Notch signaling pathway	BP	4.6e-06	GO:0010646:regulation of cell communication
component_115	Smooth_muscle_cells	GO:0045746	negative regulation of Notch signaling pathway	BP	4.6e-06	GO:0009966:regulation of signal transduction
component_115	Smooth_muscle_cells	GO:0014066	regulation of phosphatidylinositol 3-kinase signaling	BP	4.3e-07	GO:0010646:regulation of cell communication
component_115	Smooth_muscle_cells	GO:0014066	regulation of phosphatidylinositol 3-kinase signaling	BP	4.3e-07	GO:0009966:regulation of signal transduction
component_125	AFP_ALB_positive_cells,Hepatoblasts	GO:2000463	positive regulation of excitatory postsynaptic potential	BP	8.97e-06	GO:0010646:regulation of cell communication
component_125	AFP_ALB_positive_cells,Hepatoblasts	GO:2000463	positive regulation of excitatory postsynaptic potential	BP	8.97e-06	GO:0007267:cell-cell signaling
component_125	AFP_ALB_positive_cells,Hepatoblasts	GO:2000463	positive regulation of excitatory postsynaptic potential	BP	8.97e-06	GO:0009966:regulation of signal transduction
component_131	Thymic_epithelial_cells,PDE1C_ACSM3_positive_cells,Syncytiotrophoblasts_and_villous_cytotrophoblasts	GO:0006417	regulation of translation	BP	4.82e-08	GO:0009889:regulation of biosynthetic process
component_131	Thymic_epithelial_cells,PDE1C_ACSM3_positive_cells,Syncytiotrophoblasts_and_villous_cytotrophoblasts	GO:1902806	regulation of cell cycle G1/S phase transition	BP	6.88e-07	GO:0051726:regulation of cell cycle
component_131	Thymic_epithelial_cells,PDE1C_ACSM3_positive_cells,Syncytiotrophoblasts_and_villous_cytotrophoblasts	GO:1901990	regulation of mitotic cell cycle phase transition	BP	2.97e-08	GO:0051726:regulation of cell cycle
component_131	Thymic_epithelial_cells,PDE1C_ACSM3_positive_cells,Syncytiotrophoblasts_and_villous_cytotrophoblasts	GO:1901987	regulation of cell cycle phase transition	BP	1.69e-09	GO:0051726:regulation of cell cycle
component_131	Thymic_epithelial_cells,PDE1C_ACSM3_positive_cells,Syncytiotrophoblasts_and_villous_cytotrophoblasts	GO:0010564	regulation of cell cycle process	BP	1.62e-12	GO:0051726:regulation of cell cycle
component_131	Thymic_epithelial_cells,PDE1C_ACSM3_positive_cells,Syncytiotrophoblasts_and_villous_cytotrophoblasts	GO:0007346	regulation of mitotic cell cycle	BP	3.64e-08	GO:0051726:regulation of cell cycle
component_134	CSH1_CSH2_positive_cells,Trophoblast_giant_cells	GO:0046890	regulation of lipid biosynthetic process	BP	6.25e-06	GO:0009889:regulation of biosynthetic process
component_138	Inhibitory_interneurons,Horizontal_cells,Amacrine_cells	GO:0035441	cell migration involved in vasculogenesis	BP	3.99e-06	GO:0048870:cell motility
component_138	Inhibitory_interneurons,Horizontal_cells,Amacrine_cells	GO:0060973	cell migration involved in heart development	BP	3.99e-06	GO:0048870:cell motility
component_148	Ciliated_epithelial_cells	GO:0043433	negative regulation of DNA-binding transcription factor activity	BP	1.2e-06	GO:0009889:regulation of biosynthetic process
component_148	Ciliated_epithelial_cells	GO:0051090	regulation of DNA-binding transcription factor activity	BP	1.29e-07	GO:0009889:regulation of biosynthetic process
component_153	Intestinal_epithelial_cells,MUC13_DMBT1_positive_cells	GO:0010948	negative regulation of cell cycle process	BP	5.78e-06	GO:0051726:regulation of cell cycle
component_153	Intestinal_epithelial_cells,MUC13_DMBT1_positive_cells	GO:0006974	cellular response to DNA damage stimulus	BP	1.67e-09	GO:0006974:cellular response to DNA damage stimulus
component_153	Intestinal_epithelial_cells,MUC13_DMBT1_positive_cells	GO:0090068	positive regulation of cell cycle process	BP	4.51e-06	GO:0051726:regulation of cell cycle
component_153	Intestinal_epithelial_cells,MUC13_DMBT1_positive_cells	GO:0010564	regulation of cell cycle process	BP	4.29e-14	GO:0051726:regulation of cell cycle
component_163	Myeloid_cells	GO:1901992	positive regulation of mitotic cell cycle phase transition	BP	4.14e-07	GO:0051726:regulation of cell cycle
component_163	Myeloid_cells	GO:1901989	positive regulation of cell cycle phase transition	BP	5.17e-06	GO:0051726:regulation of cell cycle
component_163	Myeloid_cells	GO:0045931	positive regulation of mitotic cell cycle	BP	9.57e-06	GO:0051726:regulation of cell cycle
component_166	AFP_ALB_positive_cells,Hepatoblasts	GO:0043269	regulation of ion transport	BP	4.63e-06	GO:0043269:regulation of ion transport
component_171	ENS_neurons,Visceral_neurons	GO:0090169	regulation of spindle assembly	BP	1.03e-06	GO:0051726:regulation of cell cycle
component_171	ENS_neurons,Visceral_neurons	GO:1901673	regulation of mitotic spindle assembly	BP	1.03e-06	GO:0051726:regulation of cell cycle
component_172	Squamous_epithelial_cells,Corneal_and_conjunctival_epithelial_cells	GO:0035023	regulation of Rho protein signal transduction	BP	3.28e-07	GO:0010646:regulation of cell communication
component_172	Squamous_epithelial_cells,Corneal_and_conjunctival_epithelial_cells	GO:0035023	regulation of Rho protein signal transduction	BP	3.28e-07	GO:0009966:regulation of signal transduction
component_176	Myeloid_cells	GO:0002752	cell surface pattern recognition receptor signaling pathway	BP	4.64e-07	GO:0002682:regulation of immune system process
component_176	Myeloid_cells	GO:0002752	cell surface pattern recognition receptor signaling pathway	BP	4.64e-07	GO:0009605:response to external stimulus
component_176	Myeloid_cells	GO:0002752	cell surface pattern recognition receptor signaling pathway	BP	4.64e-07	GO:0002757:immune response-activating signal transduction
component_176	Myeloid_cells	GO:0033091	positive regulation of immature T cell proliferation	BP	3.08e-06	GO:0046649:lymphocyte activation
component_176	Myeloid_cells	GO:0033091	positive regulation of immature T cell proliferation	BP	3.08e-06	GO:0002682:regulation of immune system process
component_176	Myeloid_cells	GO:0032306	regulation of prostaglandin secretion	BP	3.08e-06	GO:0043269:regulation of ion transport
component_176	Myeloid_cells	GO:0033092	positive regulation of immature T cell proliferation in thymus	BP	3.08e-06	GO:0046649:lymphocyte activation
component_176	Myeloid_cells	GO:0033092	positive regulation of immature T cell proliferation in thymus	BP	3.08e-06	GO:0002682:regulation of immune system process
component_176	Myeloid_cells	GO:0032308	positive regulation of prostaglandin secretion	BP	3.08e-06	GO:0043269:regulation of ion transport
component_176	Myeloid_cells	GO:0070164	negative regulation of adiponectin secretion	BP	3.08e-06	GO:0010646:regulation of cell communication
component_176	Myeloid_cells	GO:0045630	positive regulation of T-helper 2 cell differentiation	BP	7.07e-06	GO:0046649:lymphocyte activation
component_176	Myeloid_cells	GO:0045630	positive regulation of T-helper 2 cell differentiation	BP	7.07e-06	GO:0002682:regulation of immune system process
component_176	Myeloid_cells	GO:0045917	positive regulation of complement activation	BP	8.33e-11	GO:0002682:regulation of immune system process
component_176	Myeloid_cells	GO:0070163	regulation of adiponectin secretion	BP	3.35e-10	GO:0010646:regulation of cell communication
component_176	Myeloid_cells	GO:0045628	regulation of T-helper 2 cell differentiation	BP	6.58e-10	GO:0046649:lymphocyte activation
component_176	Myeloid_cells	GO:0045628	regulation of T-helper 2 cell differentiation	BP	6.58e-10	GO:0002682:regulation of immune system process
component_176	Myeloid_cells	GO:2001268	negative regulation of cysteine-type endopeptidase activity involved in apoptotic signaling pathway	BP	1.53e-09	GO:0010646:regulation of cell communication
component_176	Myeloid_cells	GO:2001268	negative regulation of cysteine-type endopeptidase activity involved in apoptotic signaling pathway	BP	1.53e-09	GO:0009966:regulation of signal transduction
component_176	Myeloid_cells	GO:0070426	positive regulation of nucleotide-binding oligomerization domain containing signaling pathway	BP	9.48e-09	GO:0002682:regulation of immune system process
component_176	Myeloid_cells	GO:0070426	positive regulation of nucleotide-binding oligomerization domain containing signaling pathway	BP	9.48e-09	GO:0010646:regulation of cell communication
component_176	Myeloid_cells	GO:0070426	positive regulation of nucleotide-binding oligomerization domain containing signaling pathway	BP	9.48e-09	GO:0009966:regulation of signal transduction
component_176	Myeloid_cells	GO:0070434	positive regulation of nucleotide-binding oligomerization domain containing 2 signaling pathway	BP	9.48e-09	GO:0002682:regulation of immune system process
component_176	Myeloid_cells	GO:0070434	positive regulation of nucleotide-binding oligomerization domain containing 2 signaling pathway	BP	9.48e-09	GO:0010646:regulation of cell communication
component_176	Myeloid_cells	GO:0070434	positive regulation of nucleotide-binding oligomerization domain containing 2 signaling pathway	BP	9.48e-09	GO:0009966:regulation of signal transduction
component_176	Myeloid_cells	GO:1903265	positive regulation of tumor necrosis factor-mediated signaling pathway	BP	9.48e-09	GO:0010646:regulation of cell communication
component_176	Myeloid_cells	GO:1903265	positive regulation of tumor necrosis factor-mediated signaling pathway	BP	9.48e-09	GO:0009966:regulation of signal transduction
component_176	Myeloid_cells	GO:0070432	regulation of nucleotide-binding oligomerization domain containing 2 signaling pathway	BP	9.48e-09	GO:0002682:regulation of immune system process
component_176	Myeloid_cells	GO:0070432	regulation of nucleotide-binding oligomerization domain containing 2 signaling pathway	BP	9.48e-09	GO:0010646:regulation of cell communication
component_176	Myeloid_cells	GO:0070432	regulation of nucleotide-binding oligomerization domain containing 2 signaling pathway	BP	9.48e-09	GO:0009966:regulation of signal transduction
component_176	Myeloid_cells	GO:0070424	regulation of nucleotide-binding oligomerization domain containing signaling pathway	BP	9.48e-09	GO:0002682:regulation of immune system process
component_176	Myeloid_cells	GO:0070424	regulation of nucleotide-binding oligomerization domain containing signaling pathway	BP	9.48e-09	GO:0010646:regulation of cell communication
component_176	Myeloid_cells	GO:0070424	regulation of nucleotide-binding oligomerization domain containing signaling pathway	BP	9.48e-09	GO:0009966:regulation of signal transduction
component_176	Myeloid_cells	GO:0002218	activation of innate immune response	BP	3.23e-30	GO:0002682:regulation of immune system process
component_176	Myeloid_cells	GO:0002218	activation of innate immune response	BP	3.23e-30	GO:0009605:response to external stimulus
component_176	Myeloid_cells	GO:0033031	positive regulation of neutrophil apoptotic process	BP	3.86e-08	GO:0002682:regulation of immune system process
component_176	Myeloid_cells	GO:0033029	regulation of neutrophil apoptotic process	BP	3.86e-08	GO:0002682:regulation of immune system process
component_176	Myeloid_cells	GO:0030449	regulation of complement activation	BP	1e-08	GO:0002682:regulation of immune system process
component_176	Myeloid_cells	GO:0042098	T cell proliferation	BP	1.28e-11	GO:0046649:lymphocyte activation
component_176	Myeloid_cells	GO:0045624	positive regulation of T-helper cell differentiation	BP	5.98e-08	GO:0046649:lymphocyte activation
component_176	Myeloid_cells	GO:0045624	positive regulation of T-helper cell differentiation	BP	5.98e-08	GO:0002682:regulation of immune system process
component_176	Myeloid_cells	GO:0002758	innate immune response-activating signal transduction	BP	1.28e-21	GO:0002682:regulation of immune system process
component_176	Myeloid_cells	GO:0002758	innate immune response-activating signal transduction	BP	1.28e-21	GO:0009605:response to external stimulus
component_176	Myeloid_cells	GO:0002758	innate immune response-activating signal transduction	BP	1.28e-21	GO:0002757:immune response-activating signal transduction
component_176	Myeloid_cells	GO:0002431	Fc receptor mediated stimulatory signaling pathway	BP	6.32e-15	GO:0002682:regulation of immune system process
component_176	Myeloid_cells	GO:0002431	Fc receptor mediated stimulatory signaling pathway	BP	6.32e-15	GO:0002757:immune response-activating signal transduction
component_176	Myeloid_cells	GO:0050869	negative regulation of B cell activation	BP	1.69e-18	GO:0046649:lymphocyte activation
component_176	Myeloid_cells	GO:0050869	negative regulation of B cell activation	BP	1.69e-18	GO:0002682:regulation of immune system process
component_176	Myeloid_cells	GO:1902255	positive regulation of intrinsic apoptotic signaling pathway by p53 class mediator	BP	1.09e-07	GO:0010646:regulation of cell communication
component_176	Myeloid_cells	GO:1902255	positive regulation of intrinsic apoptotic signaling pathway by p53 class mediator	BP	1.09e-07	GO:0009966:regulation of signal transduction
component_176	Myeloid_cells	GO:0002922	positive regulation of humoral immune response	BP	1.23e-07	GO:0002682:regulation of immune system process
component_176	Myeloid_cells	GO:0045744	negative regulation of G protein-coupled receptor signaling pathway	BP	6.36e-07	GO:0010646:regulation of cell communication
component_176	Myeloid_cells	GO:0045744	negative regulation of G protein-coupled receptor signaling pathway	BP	6.36e-07	GO:0009966:regulation of signal transduction
component_176	Myeloid_cells	GO:0030889	negative regulation of B cell proliferation	BP	5.67e-11	GO:0046649:lymphocyte activation
component_176	Myeloid_cells	GO:0030889	negative regulation of B cell proliferation	BP	5.67e-11	GO:0002682:regulation of immune system process
component_176	Myeloid_cells	GO:0002220	innate immune response activating cell surface receptor signaling pathway	BP	3.94e-17	GO:0002682:regulation of immune system process
component_176	Myeloid_cells	GO:0002220	innate immune response activating cell surface receptor signaling pathway	BP	3.94e-17	GO:0009605:response to external stimulus
component_176	Myeloid_cells	GO:0002220	innate immune response activating cell surface receptor signaling pathway	BP	3.94e-17	GO:0002757:immune response-activating signal transduction
component_176	Myeloid_cells	GO:0038094	Fc-gamma receptor signaling pathway	BP	4.37e-14	GO:0002682:regulation of immune system process
component_176	Myeloid_cells	GO:0072678	T cell migration	BP	1.26e-10	GO:0048870:cell motility
component_192	Purkinje_neurons,SKOR2_NPSR1_positive_cells	GO:0070509	calcium ion import	BP	4.43e-07	GO:0006816:calcium ion transport
component_192	Purkinje_neurons,SKOR2_NPSR1_positive_cells	GO:1902305	regulation of sodium ion transmembrane transport	BP	3.25e-06	GO:0034765:regulation of ion transmembrane transport
component_192	Purkinje_neurons,SKOR2_NPSR1_positive_cells	GO:1902305	regulation of sodium ion transmembrane transport	BP	3.25e-06	GO:0043269:regulation of ion transport
component_192	Purkinje_neurons,SKOR2_NPSR1_positive_cells	GO:0002028	regulation of sodium ion transport	BP	1.35e-07	GO:0043269:regulation of ion transport
component_197	Erythroblasts	GO:0090068	positive regulation of cell cycle process	BP	1.47e-06	GO:0051726:regulation of cell cycle
component_197	Erythroblasts	GO:0006974	cellular response to DNA damage stimulus	BP	4.25e-09	GO:0006974:cellular response to DNA damage stimulus
component_197	Erythroblasts	GO:1901990	regulation of mitotic cell cycle phase transition	BP	3.29e-06	GO:0051726:regulation of cell cycle
component_199	Vascular_endothelial_cells	GO:0045746	negative regulation of Notch signaling pathway	BP	7.42e-10	GO:0010646:regulation of cell communication
component_199	Vascular_endothelial_cells	GO:0045746	negative regulation of Notch signaling pathway	BP	7.42e-10	GO:0009966:regulation of signal transduction
component_199	Vascular_endothelial_cells	GO:0008593	regulation of Notch signaling pathway	BP	8.92e-10	GO:0010646:regulation of cell communication
component_199	Vascular_endothelial_cells	GO:0008593	regulation of Notch signaling pathway	BP	8.92e-10	GO:0009966:regulation of signal transduction
component_199	Vascular_endothelial_cells	GO:0017015	regulation of transforming growth factor beta receptor signaling pathway	BP	6.13e-06	GO:0010646:regulation of cell communication
component_199	Vascular_endothelial_cells	GO:0017015	regulation of transforming growth factor beta receptor signaling pathway	BP	6.13e-06	GO:0009966:regulation of signal transduction
component_204	Skeletal_muscle_cells,Cardiomyocytes,ELF3_AGBL2_positive_cells	GO:0050925	negative regulation of negative chemotaxis	BP	5.28e-06	GO:0009605:response to external stimulus
component_204	Skeletal_muscle_cells,Cardiomyocytes,ELF3_AGBL2_positive_cells	GO:0055023	positive regulation of cardiac muscle tissue growth	BP	5.55e-09	GO:0045927:positive regulation of growth
component_204	Skeletal_muscle_cells,Cardiomyocytes,ELF3_AGBL2_positive_cells	GO:0060045	positive regulation of cardiac muscle cell proliferation	BP	5.55e-09	GO:0045927:positive regulation of growth
component_204	Skeletal_muscle_cells,Cardiomyocytes,ELF3_AGBL2_positive_cells	GO:0046622	positive regulation of organ growth	BP	5.76e-08	GO:0045927:positive regulation of growth
component_204	Skeletal_muscle_cells,Cardiomyocytes,ELF3_AGBL2_positive_cells	GO:0060421	positive regulation of heart growth	BP	5.76e-08	GO:0045927:positive regulation of growth
component_207	Megakaryocytes	GO:0010511	regulation of phosphatidylinositol biosynthetic process	BP	7.17e-06	GO:0044255:cellular lipid metabolic process
component_207	Megakaryocytes	GO:0010511	regulation of phosphatidylinositol biosynthetic process	BP	7.17e-06	GO:0009889:regulation of biosynthetic process
component_207	Megakaryocytes	GO:0032885	regulation of polysaccharide biosynthetic process	BP	4.81e-07	GO:0009889:regulation of biosynthetic process
component_207	Megakaryocytes	GO:0010544	negative regulation of platelet activation	BP	5.03e-06	GO:0030168:platelet activation
component_207	Megakaryocytes	GO:0010544	negative regulation of platelet activation	BP	5.03e-06	GO:0009605:response to external stimulus
component_207	Megakaryocytes	GO:0043255	regulation of carbohydrate biosynthetic process	BP	2.4e-06	GO:0009889:regulation of biosynthetic process
component_218	Stromal_cells	GO:0050929	induction of negative chemotaxis	BP	6.64e-06	GO:0009605:response to external stimulus
component_218	Stromal_cells	GO:0050924	positive regulation of negative chemotaxis	BP	6.64e-06	GO:0009605:response to external stimulus
component_218	Stromal_cells	GO:0099545	trans-synaptic signaling by trans-synaptic complex	BP	6.64e-06	GO:0007267:cell-cell signaling
component_218	Stromal_cells	GO:0021972	corticospinal neuron axon guidance through spinal cord	BP	6.64e-06	GO:0097485:neuron projection guidance
component_218	Stromal_cells	GO:0021972	corticospinal neuron axon guidance through spinal cord	BP	6.64e-06	GO:0007411:axon guidance
component_218	Stromal_cells	GO:0090027	negative regulation of monocyte chemotaxis	BP	6.64e-06	GO:0002682:regulation of immune system process
component_218	Stromal_cells	GO:0090027	negative regulation of monocyte chemotaxis	BP	6.64e-06	GO:0048870:cell motility
component_218	Stromal_cells	GO:0090027	negative regulation of monocyte chemotaxis	BP	6.64e-06	GO:0009605:response to external stimulus
component_218	Stromal_cells	GO:0061002	negative regulation of dendritic spine morphogenesis	BP	7.66e-06	GO:0060996:dendritic spine development
component_218	Stromal_cells	GO:0032230	positive regulation of synaptic transmission, GABAergic	BP	7.66e-06	GO:0010646:regulation of cell communication
component_218	Stromal_cells	GO:0032230	positive regulation of synaptic transmission, GABAergic	BP	7.66e-06	GO:0007267:cell-cell signaling
component_218	Stromal_cells	GO:0061000	negative regulation of dendritic spine development	BP	7.66e-06	GO:0060996:dendritic spine development
component_218	Stromal_cells	GO:0050923	regulation of negative chemotaxis	BP	1.12e-16	GO:0009605:response to external stimulus
component_218	Stromal_cells	GO:0050925	negative regulation of negative chemotaxis	BP	3.99e-11	GO:0009605:response to external stimulus
component_218	Stromal_cells	GO:0048023	positive regulation of melanin biosynthetic process	BP	8e-06	GO:0009889:regulation of biosynthetic process
component_218	Stromal_cells	GO:0048021	regulation of melanin biosynthetic process	BP	8e-06	GO:0009889:regulation of biosynthetic process
component_218	Stromal_cells	GO:1900376	regulation of secondary metabolite biosynthetic process	BP	8e-06	GO:0009889:regulation of biosynthetic process
component_220	Syncytiotrophoblasts_and_villous_cytotrophoblasts,Thymic_epithelial_cells,PDE1C_ACSM3_positive_cells	GO:0019884	antigen processing and presentation of exogenous antigen	BP	3.75e-06	GO:0019882:antigen processing and presentation
component_237	Stromal_cells	GO:0010594	regulation of endothelial cell migration	BP	1.64e-07	GO:0048870:cell motility
component_237	Stromal_cells	GO:0090092	regulation of transmembrane receptor protein serine/threonine kinase signaling pathway	BP	5.17e-08	GO:0010646:regulation of cell communication
component_237	Stromal_cells	GO:0090092	regulation of transmembrane receptor protein serine/threonine kinase signaling pathway	BP	5.17e-08	GO:0009966:regulation of signal transduction
component_237	Stromal_cells	GO:1904062	regulation of cation transmembrane transport	BP	2.14e-07	GO:0034765:regulation of ion transmembrane transport
component_237	Stromal_cells	GO:1904062	regulation of cation transmembrane transport	BP	2.14e-07	GO:0043269:regulation of ion transport
component_237	Stromal_cells	GO:0010632	regulation of epithelial cell migration	BP	2.66e-06	GO:0048870:cell motility
component_238	ENS_neurons,Visceral_neurons	GO:0006851	mitochondrial calcium ion transmembrane transport	BP	3.84e-06	GO:0006816:calcium ion transport
component_238	ENS_neurons,Visceral_neurons	GO:1902668	negative regulation of axon guidance	BP	5.16e-06	GO:0009605:response to external stimulus
component_238	ENS_neurons,Visceral_neurons	GO:1902668	negative regulation of axon guidance	BP	5.16e-06	GO:0097485:neuron projection guidance
component_238	ENS_neurons,Visceral_neurons	GO:1902668	negative regulation of axon guidance	BP	5.16e-06	GO:0007411:axon guidance
component_238	ENS_neurons,Visceral_neurons	GO:0090260	negative regulation of retinal ganglion cell axon guidance	BP	5.16e-06	GO:0009605:response to external stimulus
component_238	ENS_neurons,Visceral_neurons	GO:0090260	negative regulation of retinal ganglion cell axon guidance	BP	5.16e-06	GO:0097485:neuron projection guidance
component_238	ENS_neurons,Visceral_neurons	GO:0090260	negative regulation of retinal ganglion cell axon guidance	BP	5.16e-06	GO:0007411:axon guidance
component_239	Myeloid_cells	GO:0032816	positive regulation of natural killer cell activation	BP	4.34e-08	GO:0046649:lymphocyte activation
component_239	Myeloid_cells	GO:0032816	positive regulation of natural killer cell activation	BP	4.34e-08	GO:0002682:regulation of immune system process
component_239	Myeloid_cells	GO:0045917	positive regulation of complement activation	BP	4.35e-07	GO:0002682:regulation of immune system process
component_239	Myeloid_cells	GO:0070163	regulation of adiponectin secretion	BP	1.1e-06	GO:0010646:regulation of cell communication
component_239	Myeloid_cells	GO:0071724	response to diacyl bacterial lipopeptide	BP	3.02e-07	GO:0009605:response to external stimulus
component_239	Myeloid_cells	GO:0071726	cellular response to diacyl bacterial lipopeptide	BP	3.02e-07	GO:0009605:response to external stimulus
component_239	Myeloid_cells	GO:0030449	regulation of complement activation	BP	2.65e-09	GO:0002682:regulation of immune system process
component_239	Myeloid_cells	GO:0045986	negative regulation of smooth muscle contraction	BP	8.13e-07	GO:0006937:regulation of muscle contraction
component_239	Myeloid_cells	GO:0045932	negative regulation of muscle contraction	BP	8.13e-07	GO:0006937:regulation of muscle contraction
component_239	Myeloid_cells	GO:2001279	regulation of unsaturated fatty acid biosynthetic process	BP	8.42e-09	GO:0044255:cellular lipid metabolic process
component_239	Myeloid_cells	GO:2001279	regulation of unsaturated fatty acid biosynthetic process	BP	8.42e-09	GO:0009889:regulation of biosynthetic process
component_239	Myeloid_cells	GO:0031392	regulation of prostaglandin biosynthetic process	BP	8.42e-09	GO:0044255:cellular lipid metabolic process
component_239	Myeloid_cells	GO:0031392	regulation of prostaglandin biosynthetic process	BP	8.42e-09	GO:0009889:regulation of biosynthetic process
component_239	Myeloid_cells	GO:0031394	positive regulation of prostaglandin biosynthetic process	BP	8.42e-09	GO:0044255:cellular lipid metabolic process
component_239	Myeloid_cells	GO:0031394	positive regulation of prostaglandin biosynthetic process	BP	8.42e-09	GO:0009889:regulation of biosynthetic process
component_239	Myeloid_cells	GO:2001280	positive regulation of unsaturated fatty acid biosynthetic process	BP	8.42e-09	GO:0044255:cellular lipid metabolic process
component_239	Myeloid_cells	GO:2001280	positive regulation of unsaturated fatty acid biosynthetic process	BP	8.42e-09	GO:0009889:regulation of biosynthetic process
component_239	Myeloid_cells	GO:0045916	negative regulation of complement activation	BP	1.55e-06	GO:0002682:regulation of immune system process
component_239	Myeloid_cells	GO:0002504	antigen processing and presentation of peptide or polysaccharide antigen via MHC class II	BP	1.8e-15	GO:0019882:antigen processing and presentation
component_239	Myeloid_cells	GO:0002495	antigen processing and presentation of peptide antigen via MHC class II	BP	1.8e-15	GO:0019882:antigen processing and presentation
component_239	Myeloid_cells	GO:0002478	antigen processing and presentation of exogenous peptide antigen	BP	1.8e-15	GO:0019882:antigen processing and presentation
component_239	Myeloid_cells	GO:0019886	antigen processing and presentation of exogenous peptide antigen via MHC class II	BP	1.8e-15	GO:0019882:antigen processing and presentation
component_239	Myeloid_cells	GO:0032814	regulation of natural killer cell activation	BP	1.63e-06	GO:0046649:lymphocyte activation
component_239	Myeloid_cells	GO:0032814	regulation of natural killer cell activation	BP	1.63e-06	GO:0002682:regulation of immune system process
component_239	Myeloid_cells	GO:2001171	positive regulation of ATP biosynthetic process	BP	1.9e-06	GO:0009889:regulation of biosynthetic process
component_239	Myeloid_cells	GO:2001169	regulation of ATP biosynthetic process	BP	1.9e-06	GO:0009889:regulation of biosynthetic process
component_239	Myeloid_cells	GO:0038094	Fc-gamma receptor signaling pathway	BP	3.25e-15	GO:0002682:regulation of immune system process
component_239	Myeloid_cells	GO:0019884	antigen processing and presentation of exogenous antigen	BP	4.48e-15	GO:0019882:antigen processing and presentation
component_239	Myeloid_cells	GO:0033031	positive regulation of neutrophil apoptotic process	BP	2.32e-06	GO:0002682:regulation of immune system process
component_239	Myeloid_cells	GO:0033029	regulation of neutrophil apoptotic process	BP	2.32e-06	GO:0002682:regulation of immune system process
component_239	Myeloid_cells	GO:0045591	positive regulation of regulatory T cell differentiation	BP	2.79e-06	GO:0046649:lymphocyte activation
component_239	Myeloid_cells	GO:0045591	positive regulation of regulatory T cell differentiation	BP	2.79e-06	GO:0002682:regulation of immune system process
component_239	Myeloid_cells	GO:0045655	regulation of monocyte differentiation	BP	3.25e-06	GO:0002682:regulation of immune system process
component_239	Myeloid_cells	GO:0045657	positive regulation of monocyte differentiation	BP	3.25e-06	GO:0002682:regulation of immune system process
component_239	Myeloid_cells	GO:0046627	negative regulation of insulin receptor signaling pathway	BP	3.72e-08	GO:0010646:regulation of cell communication
component_239	Myeloid_cells	GO:0046627	negative regulation of insulin receptor signaling pathway	BP	3.72e-08	GO:0009966:regulation of signal transduction
component_239	Myeloid_cells	GO:0002431	Fc receptor mediated stimulatory signaling pathway	BP	1.56e-11	GO:0002682:regulation of immune system process
component_239	Myeloid_cells	GO:0002431	Fc receptor mediated stimulatory signaling pathway	BP	1.56e-11	GO:0002757:immune response-activating signal transduction
component_239	Myeloid_cells	GO:0050869	negative regulation of B cell activation	BP	2.95e-14	GO:0046649:lymphocyte activation
component_239	Myeloid_cells	GO:0050869	negative regulation of B cell activation	BP	2.95e-14	GO:0002682:regulation of immune system process
component_273	Erythroblasts	GO:0070960	positive regulation of neutrophil mediated cytotoxicity	BP	4.94e-06	GO:0002682:regulation of immune system process
component_273	Erythroblasts	GO:0070949	regulation of neutrophil mediated killing of symbiont cell	BP	4.94e-06	GO:0002682:regulation of immune system process
component_273	Erythroblasts	GO:0070949	regulation of neutrophil mediated killing of symbiont cell	BP	4.94e-06	GO:0009605:response to external stimulus
component_277	Limbic_system_neurons,Inhibitory_neurons	GO:0070509	calcium ion import	BP	1.28e-06	GO:0006816:calcium ion transport
component_277	Limbic_system_neurons,Inhibitory_neurons	GO:1902305	regulation of sodium ion transmembrane transport	BP	7.48e-06	GO:0034765:regulation of ion transmembrane transport
component_277	Limbic_system_neurons,Inhibitory_neurons	GO:1902305	regulation of sodium ion transmembrane transport	BP	7.48e-06	GO:0043269:regulation of ion transport
component_277	Limbic_system_neurons,Inhibitory_neurons	GO:0002028	regulation of sodium ion transport	BP	4.29e-06	GO:0043269:regulation of ion transport
component_279	Lymphatic_endothelial_cells	GO:2000508	regulation of dendritic cell chemotaxis	BP	7.49e-07	GO:0002682:regulation of immune system process
component_279	Lymphatic_endothelial_cells	GO:2000508	regulation of dendritic cell chemotaxis	BP	7.49e-07	GO:0048870:cell motility
component_279	Lymphatic_endothelial_cells	GO:2000508	regulation of dendritic cell chemotaxis	BP	7.49e-07	GO:0009605:response to external stimulus
component_279	Lymphatic_endothelial_cells	GO:2000527	regulation of myeloid dendritic cell chemotaxis	BP	7.49e-07	GO:0002682:regulation of immune system process
component_279	Lymphatic_endothelial_cells	GO:2000527	regulation of myeloid dendritic cell chemotaxis	BP	7.49e-07	GO:0048870:cell motility
component_279	Lymphatic_endothelial_cells	GO:2000527	regulation of myeloid dendritic cell chemotaxis	BP	7.49e-07	GO:0009605:response to external stimulus
component_279	Lymphatic_endothelial_cells	GO:2000510	positive regulation of dendritic cell chemotaxis	BP	7.49e-07	GO:0002682:regulation of immune system process
component_279	Lymphatic_endothelial_cells	GO:2000510	positive regulation of dendritic cell chemotaxis	BP	7.49e-07	GO:0048870:cell motility
component_279	Lymphatic_endothelial_cells	GO:2000510	positive regulation of dendritic cell chemotaxis	BP	7.49e-07	GO:0009605:response to external stimulus
component_279	Lymphatic_endothelial_cells	GO:2000529	positive regulation of myeloid dendritic cell chemotaxis	BP	7.49e-07	GO:0002682:regulation of immune system process
component_279	Lymphatic_endothelial_cells	GO:2000529	positive regulation of myeloid dendritic cell chemotaxis	BP	7.49e-07	GO:0048870:cell motility
component_279	Lymphatic_endothelial_cells	GO:2000529	positive regulation of myeloid dendritic cell chemotaxis	BP	7.49e-07	GO:0009605:response to external stimulus
component_279	Lymphatic_endothelial_cells	GO:0070165	positive regulation of adiponectin secretion	BP	1.96e-06	GO:0010646:regulation of cell communication
component_279	Lymphatic_endothelial_cells	GO:0034138	toll-like receptor 3 signaling pathway	BP	2.41e-06	GO:0002682:regulation of immune system process
component_279	Lymphatic_endothelial_cells	GO:0021800	cerebral cortex tangential migration	BP	2.48e-06	GO:0048870:cell motility
component_279	Lymphatic_endothelial_cells	GO:2001224	positive regulation of neuron migration	BP	4.99e-12	GO:0048870:cell motility
component_279	Lymphatic_endothelial_cells	GO:0150102	negative regulation of monocyte activation	BP	2.77e-06	GO:0002682:regulation of immune system process
component_279	Lymphatic_endothelial_cells	GO:0002774	Fc receptor mediated inhibitory signaling pathway	BP	2.77e-06	GO:0002682:regulation of immune system process
component_279	Lymphatic_endothelial_cells	GO:1904237	positive regulation of substrate-dependent cell migration, cell attachment to substrate	BP	2.77e-06	GO:0048870:cell motility
component_279	Lymphatic_endothelial_cells	GO:1904235	regulation of substrate-dependent cell migration, cell attachment to substrate	BP	2.77e-06	GO:0048870:cell motility
component_279	Lymphatic_endothelial_cells	GO:1903905	positive regulation of establishment of T cell polarity	BP	2.87e-06	GO:0046649:lymphocyte activation
component_279	Lymphatic_endothelial_cells	GO:1903905	positive regulation of establishment of T cell polarity	BP	2.87e-06	GO:0002682:regulation of immune system process
component_279	Lymphatic_endothelial_cells	GO:0061485	memory T cell proliferation	BP	2.87e-06	GO:0046649:lymphocyte activation
component_279	Lymphatic_endothelial_cells	GO:0002651	positive regulation of tolerance induction to self antigen	BP	2.87e-06	GO:0002682:regulation of immune system process
component_279	Lymphatic_endothelial_cells	GO:0002661	regulation of B cell tolerance induction	BP	2.87e-06	GO:0002682:regulation of immune system process
component_279	Lymphatic_endothelial_cells	GO:0035669	TRAM-dependent toll-like receptor 4 signaling pathway	BP	2.87e-06	GO:0002682:regulation of immune system process
component_279	Lymphatic_endothelial_cells	GO:0002645	positive regulation of tolerance induction	BP	2.87e-06	GO:0002682:regulation of immune system process
component_279	Lymphatic_endothelial_cells	GO:0002666	positive regulation of T cell tolerance induction	BP	2.87e-06	GO:0002682:regulation of immune system process
component_279	Lymphatic_endothelial_cells	GO:0051138	positive regulation of NK T cell differentiation	BP	2.87e-06	GO:0046649:lymphocyte activation
component_279	Lymphatic_endothelial_cells	GO:0051138	positive regulation of NK T cell differentiation	BP	2.87e-06	GO:0002682:regulation of immune system process
component_282	Vascular_endothelial_cells	GO:2000650	negative regulation of sodium ion transmembrane transporter activity	BP	2.39e-08	GO:0034765:regulation of ion transmembrane transport
component_282	Vascular_endothelial_cells	GO:2000650	negative regulation of sodium ion transmembrane transporter activity	BP	2.39e-08	GO:0043269:regulation of ion transport
component_282	Vascular_endothelial_cells	GO:1902306	negative regulation of sodium ion transmembrane transport	BP	2.39e-08	GO:0034765:regulation of ion transmembrane transport
component_282	Vascular_endothelial_cells	GO:1902306	negative regulation of sodium ion transmembrane transport	BP	2.39e-08	GO:0043269:regulation of ion transport
component_282	Vascular_endothelial_cells	GO:0010766	negative regulation of sodium ion transport	BP	2.39e-08	GO:0043269:regulation of ion transport
component_282	Vascular_endothelial_cells	GO:1900449	regulation of glutamate receptor signaling pathway	BP	9.32e-08	GO:0010646:regulation of cell communication
component_282	Vascular_endothelial_cells	GO:1900449	regulation of glutamate receptor signaling pathway	BP	9.32e-08	GO:0009966:regulation of signal transduction
component_282	Vascular_endothelial_cells	GO:0003056	regulation of vascular associated smooth muscle contraction	BP	1e-07	GO:0006937:regulation of muscle contraction
component_282	Vascular_endothelial_cells	GO:0005979	regulation of glycogen biosynthetic process	BP	1.36e-07	GO:0009889:regulation of biosynthetic process
component_282	Vascular_endothelial_cells	GO:0010962	regulation of glucan biosynthetic process	BP	1.36e-07	GO:0009889:regulation of biosynthetic process
component_282	Vascular_endothelial_cells	GO:0045725	positive regulation of glycogen biosynthetic process	BP	1.36e-07	GO:0009889:regulation of biosynthetic process
component_282	Vascular_endothelial_cells	GO:0038096	Fc-gamma receptor signaling pathway involved in phagocytosis	BP	3.01e-09	GO:0002682:regulation of immune system process
component_282	Vascular_endothelial_cells	GO:0038096	Fc-gamma receptor signaling pathway involved in phagocytosis	BP	3.01e-09	GO:0002757:immune response-activating signal transduction
component_282	Vascular_endothelial_cells	GO:0002433	immune response-regulating cell surface receptor signaling pathway involved in phagocytosis	BP	3.01e-09	GO:0002682:regulation of immune system process
component_285	Neuroendocrine_cells,Islet_endocrine_cells,Chromaffin_cells	GO:0010881	regulation of cardiac muscle contraction by regulation of the release of sequestered calcium ion	BP	3.38e-07	GO:0006816:calcium ion transport
component_285	Neuroendocrine_cells,Islet_endocrine_cells,Chromaffin_cells	GO:0010881	regulation of cardiac muscle contraction by regulation of the release of sequestered calcium ion	BP	3.38e-07	GO:0006937:regulation of muscle contraction
component_285	Neuroendocrine_cells,Islet_endocrine_cells,Chromaffin_cells	GO:0010881	regulation of cardiac muscle contraction by regulation of the release of sequestered calcium ion	BP	3.38e-07	GO:0034765:regulation of ion transmembrane transport
component_285	Neuroendocrine_cells,Islet_endocrine_cells,Chromaffin_cells	GO:0010881	regulation of cardiac muscle contraction by regulation of the release of sequestered calcium ion	BP	3.38e-07	GO:0043269:regulation of ion transport
component_285	Neuroendocrine_cells,Islet_endocrine_cells,Chromaffin_cells	GO:0010880	regulation of release of sequestered calcium ion into cytosol by sarcoplasmic reticulum	BP	3.38e-07	GO:0006816:calcium ion transport
component_285	Neuroendocrine_cells,Islet_endocrine_cells,Chromaffin_cells	GO:0010880	regulation of release of sequestered calcium ion into cytosol by sarcoplasmic reticulum	BP	3.38e-07	GO:0034765:regulation of ion transmembrane transport
component_285	Neuroendocrine_cells,Islet_endocrine_cells,Chromaffin_cells	GO:0010880	regulation of release of sequestered calcium ion into cytosol by sarcoplasmic reticulum	BP	3.38e-07	GO:0043269:regulation of ion transport
component_285	Neuroendocrine_cells,Islet_endocrine_cells,Chromaffin_cells	GO:0010882	regulation of cardiac muscle contraction by calcium ion signaling	BP	1.25e-06	GO:0006937:regulation of muscle contraction
component_285	Neuroendocrine_cells,Islet_endocrine_cells,Chromaffin_cells	GO:2000649	regulation of sodium ion transmembrane transporter activity	BP	4.27e-09	GO:0034765:regulation of ion transmembrane transport
component_285	Neuroendocrine_cells,Islet_endocrine_cells,Chromaffin_cells	GO:2000649	regulation of sodium ion transmembrane transporter activity	BP	4.27e-09	GO:0043269:regulation of ion transport
component_285	Neuroendocrine_cells,Islet_endocrine_cells,Chromaffin_cells	GO:0048639	positive regulation of developmental growth	BP	5.91e-12	GO:0045927:positive regulation of growth
component_285	Neuroendocrine_cells,Islet_endocrine_cells,Chromaffin_cells	GO:0001764	neuron migration	BP	6.54e-09	GO:0048870:cell motility
component_286	Inhibitory_interneurons,Amacrine_cells,PDE11A_FAM19A2_positive_cells	GO:0061003	positive regulation of dendritic spine morphogenesis	BP	5.13e-07	GO:0060996:dendritic spine development
component_286	Inhibitory_interneurons,Amacrine_cells,PDE11A_FAM19A2_positive_cells	GO:1902668	negative regulation of axon guidance	BP	6.16e-07	GO:0009605:response to external stimulus
component_286	Inhibitory_interneurons,Amacrine_cells,PDE11A_FAM19A2_positive_cells	GO:1902668	negative regulation of axon guidance	BP	6.16e-07	GO:0097485:neuron projection guidance
component_286	Inhibitory_interneurons,Amacrine_cells,PDE11A_FAM19A2_positive_cells	GO:1902668	negative regulation of axon guidance	BP	6.16e-07	GO:0007411:axon guidance
component_286	Inhibitory_interneurons,Amacrine_cells,PDE11A_FAM19A2_positive_cells	GO:0090260	negative regulation of retinal ganglion cell axon guidance	BP	6.16e-07	GO:0009605:response to external stimulus
component_286	Inhibitory_interneurons,Amacrine_cells,PDE11A_FAM19A2_positive_cells	GO:0090260	negative regulation of retinal ganglion cell axon guidance	BP	6.16e-07	GO:0097485:neuron projection guidance
component_286	Inhibitory_interneurons,Amacrine_cells,PDE11A_FAM19A2_positive_cells	GO:0090260	negative regulation of retinal ganglion cell axon guidance	BP	6.16e-07	GO:0007411:axon guidance
component_286	Inhibitory_interneurons,Amacrine_cells,PDE11A_FAM19A2_positive_cells	GO:2001224	positive regulation of neuron migration	BP	7.06e-07	GO:0048870:cell motility
component_286	Inhibitory_interneurons,Amacrine_cells,PDE11A_FAM19A2_positive_cells	GO:0021885	forebrain cell migration	BP	7.48e-07	GO:0048870:cell motility
component_286	Inhibitory_interneurons,Amacrine_cells,PDE11A_FAM19A2_positive_cells	GO:0021795	cerebral cortex cell migration	BP	7.48e-07	GO:0048870:cell motility
component_286	Inhibitory_interneurons,Amacrine_cells,PDE11A_FAM19A2_positive_cells	GO:0022029	telencephalon cell migration	BP	7.48e-07	GO:0048870:cell motility
component_286	Inhibitory_interneurons,Amacrine_cells,PDE11A_FAM19A2_positive_cells	GO:2000302	positive regulation of synaptic vesicle exocytosis	BP	1.01e-06	GO:0010646:regulation of cell communication
component_286	Inhibitory_interneurons,Amacrine_cells,PDE11A_FAM19A2_positive_cells	GO:2000302	positive regulation of synaptic vesicle exocytosis	BP	1.01e-06	GO:0007267:cell-cell signaling
component_286	Inhibitory_interneurons,Amacrine_cells,PDE11A_FAM19A2_positive_cells	GO:0050923	regulation of negative chemotaxis	BP	7.57e-10	GO:0009605:response to external stimulus
component_286	Inhibitory_interneurons,Amacrine_cells,PDE11A_FAM19A2_positive_cells	GO:0050925	negative regulation of negative chemotaxis	BP	1.12e-06	GO:0009605:response to external stimulus
component_286	Inhibitory_interneurons,Amacrine_cells,PDE11A_FAM19A2_positive_cells	GO:0090259	regulation of retinal ganglion cell axon guidance	BP	1.09e-09	GO:0009605:response to external stimulus
component_286	Inhibitory_interneurons,Amacrine_cells,PDE11A_FAM19A2_positive_cells	GO:0090259	regulation of retinal ganglion cell axon guidance	BP	1.09e-09	GO:0097485:neuron projection guidance
component_286	Inhibitory_interneurons,Amacrine_cells,PDE11A_FAM19A2_positive_cells	GO:0090259	regulation of retinal ganglion cell axon guidance	BP	1.09e-09	GO:0007411:axon guidance
component_286	Inhibitory_interneurons,Amacrine_cells,PDE11A_FAM19A2_positive_cells	GO:0031290	retinal ganglion cell axon guidance	BP	7.65e-13	GO:0097485:neuron projection guidance
component_286	Inhibitory_interneurons,Amacrine_cells,PDE11A_FAM19A2_positive_cells	GO:0031290	retinal ganglion cell axon guidance	BP	7.65e-13	GO:0007411:axon guidance
component_286	Inhibitory_interneurons,Amacrine_cells,PDE11A_FAM19A2_positive_cells	GO:0048842	positive regulation of axon extension involved in axon guidance	BP	1.71e-06	GO:0045927:positive regulation of growth
component_286	Inhibitory_interneurons,Amacrine_cells,PDE11A_FAM19A2_positive_cells	GO:0048842	positive regulation of axon extension involved in axon guidance	BP	1.71e-06	GO:0009605:response to external stimulus
component_286	Inhibitory_interneurons,Amacrine_cells,PDE11A_FAM19A2_positive_cells	GO:0097491	sympathetic neuron projection guidance	BP	1.83e-06	GO:0097485:neuron projection guidance
component_295	Mesothelial_cells	GO:1900748	positive regulation of vascular endothelial growth factor signaling pathway	BP	7.77e-07	GO:0010646:regulation of cell communication
component_295	Mesothelial_cells	GO:1900748	positive regulation of vascular endothelial growth factor signaling pathway	BP	7.77e-07	GO:0009966:regulation of signal transduction
component_295	Mesothelial_cells	GO:0050923	regulation of negative chemotaxis	BP	1.61e-06	GO:0009605:response to external stimulus
component_295	Mesothelial_cells	GO:0045747	positive regulation of Notch signaling pathway	BP	6.14e-06	GO:0010646:regulation of cell communication
component_295	Mesothelial_cells	GO:0045747	positive regulation of Notch signaling pathway	BP	6.14e-06	GO:0009966:regulation of signal transduction
component_295	Mesothelial_cells	GO:1900746	regulation of vascular endothelial growth factor signaling pathway	BP	2.79e-07	GO:0010646:regulation of cell communication
component_295	Mesothelial_cells	GO:1900746	regulation of vascular endothelial growth factor signaling pathway	BP	2.79e-07	GO:0009966:regulation of signal transduction
component_295	Mesothelial_cells	GO:0010881	regulation of cardiac muscle contraction by regulation of the release of sequestered calcium ion	BP	1.5e-06	GO:0006816:calcium ion transport
component_295	Mesothelial_cells	GO:0010881	regulation of cardiac muscle contraction by regulation of the release of sequestered calcium ion	BP	1.5e-06	GO:0006937:regulation of muscle contraction
component_295	Mesothelial_cells	GO:0010881	regulation of cardiac muscle contraction by regulation of the release of sequestered calcium ion	BP	1.5e-06	GO:0034765:regulation of ion transmembrane transport
component_295	Mesothelial_cells	GO:0010881	regulation of cardiac muscle contraction by regulation of the release of sequestered calcium ion	BP	1.5e-06	GO:0043269:regulation of ion transport
component_295	Mesothelial_cells	GO:0010880	regulation of release of sequestered calcium ion into cytosol by sarcoplasmic reticulum	BP	1.5e-06	GO:0006816:calcium ion transport
component_295	Mesothelial_cells	GO:0010880	regulation of release of sequestered calcium ion into cytosol by sarcoplasmic reticulum	BP	1.5e-06	GO:0034765:regulation of ion transmembrane transport
component_295	Mesothelial_cells	GO:0010880	regulation of release of sequestered calcium ion into cytosol by sarcoplasmic reticulum	BP	1.5e-06	GO:0043269:regulation of ion transport
component_295	Mesothelial_cells	GO:0010882	regulation of cardiac muscle contraction by calcium ion signaling	BP	4.53e-06	GO:0006937:regulation of muscle contraction
component_295	Mesothelial_cells	GO:0006940	regulation of smooth muscle contraction	BP	2.3e-06	GO:0006937:regulation of muscle contraction
component_295	Mesothelial_cells	GO:0001755	neural crest cell migration	BP	9.89e-08	GO:0048870:cell motility
component_295	Mesothelial_cells	GO:0086004	regulation of cardiac muscle cell contraction	BP	8.51e-06	GO:0006937:regulation of muscle contraction
component_295	Mesothelial_cells	GO:0086004	regulation of cardiac muscle cell contraction	BP	8.51e-06	GO:0070252:actin-mediated cell contraction
component_296	Megakaryocytes	GO:0045653	negative regulation of megakaryocyte differentiation	BP	1.72e-07	GO:0002682:regulation of immune system process
component_296	Megakaryocytes	GO:0045347	negative regulation of MHC class II biosynthetic process	BP	1.72e-07	GO:0009889:regulation of biosynthetic process
component_296	Megakaryocytes	GO:0045651	positive regulation of macrophage differentiation	BP	1.72e-07	GO:0002682:regulation of immune system process
component_296	Megakaryocytes	GO:0042590	antigen processing and presentation of exogenous peptide antigen via MHC class I	BP	5.5e-07	GO:0019882:antigen processing and presentation
component_296	Megakaryocytes	GO:2000318	positive regulation of T-helper 17 type immune response	BP	1.53e-06	GO:0002682:regulation of immune system process
component_296	Megakaryocytes	GO:2000570	positive regulation of T-helper 2 cell activation	BP	1.53e-06	GO:0046649:lymphocyte activation
component_296	Megakaryocytes	GO:2000570	positive regulation of T-helper 2 cell activation	BP	1.53e-06	GO:0002682:regulation of immune system process
component_296	Megakaryocytes	GO:2000569	regulation of T-helper 2 cell activation	BP	1.53e-06	GO:0046649:lymphocyte activation
component_296	Megakaryocytes	GO:2000569	regulation of T-helper 2 cell activation	BP	1.53e-06	GO:0002682:regulation of immune system process
component_296	Megakaryocytes	GO:0090038	negative regulation of protein kinase C signaling	BP	1.98e-06	GO:0010646:regulation of cell communication
component_296	Megakaryocytes	GO:0090038	negative regulation of protein kinase C signaling	BP	1.98e-06	GO:0009966:regulation of signal transduction
component_296	Megakaryocytes	GO:0002774	Fc receptor mediated inhibitory signaling pathway	BP	3.27e-06	GO:0002682:regulation of immune system process
component_296	Megakaryocytes	GO:1901164	negative regulation of trophoblast cell migration	BP	3.27e-06	GO:0048870:cell motility
component_297	Erythroblasts	GO:0048023	positive regulation of melanin biosynthetic process	BP	4.56e-09	GO:0009889:regulation of biosynthetic process
component_297	Erythroblasts	GO:0048021	regulation of melanin biosynthetic process	BP	4.56e-09	GO:0009889:regulation of biosynthetic process
component_297	Erythroblasts	GO:1900376	regulation of secondary metabolite biosynthetic process	BP	4.56e-09	GO:0009889:regulation of biosynthetic process
component_297	Erythroblasts	GO:1900378	positive regulation of secondary metabolite biosynthetic process	BP	4.56e-09	GO:0009889:regulation of biosynthetic process
component_297	Erythroblasts	GO:1990918	double-strand break repair involved in meiotic recombination	BP	9.96e-08	GO:0006974:cellular response to DNA damage stimulus
component_297	Erythroblasts	GO:0006289	nucleotide-excision repair	BP	9.96e-08	GO:0006974:cellular response to DNA damage stimulus
component_297	Erythroblasts	GO:2000001	regulation of DNA damage checkpoint	BP	1.13e-07	GO:0006974:cellular response to DNA damage stimulus
component_297	Erythroblasts	GO:2000001	regulation of DNA damage checkpoint	BP	1.13e-07	GO:0010646:regulation of cell communication
component_297	Erythroblasts	GO:2000001	regulation of DNA damage checkpoint	BP	1.13e-07	GO:0051726:regulation of cell cycle
component_297	Erythroblasts	GO:2000001	regulation of DNA damage checkpoint	BP	1.13e-07	GO:0009966:regulation of signal transduction
component_297	Erythroblasts	GO:0070495	negative regulation of thrombin-activated receptor signaling pathway	BP	1.13e-07	GO:0010646:regulation of cell communication
component_297	Erythroblasts	GO:0070495	negative regulation of thrombin-activated receptor signaling pathway	BP	1.13e-07	GO:0009966:regulation of signal transduction
component_297	Erythroblasts	GO:1905213	negative regulation of mitotic chromosome condensation	BP	1.13e-07	GO:0051726:regulation of cell cycle
component_297	Erythroblasts	GO:1903286	regulation of potassium ion import	BP	1.13e-07	GO:0034765:regulation of ion transmembrane transport
component_297	Erythroblasts	GO:1903286	regulation of potassium ion import	BP	1.13e-07	GO:0043269:regulation of ion transport
component_297	Erythroblasts	GO:1903278	positive regulation of sodium ion export across plasma membrane	BP	1.13e-07	GO:0034765:regulation of ion transmembrane transport
component_297	Erythroblasts	GO:1903278	positive regulation of sodium ion export across plasma membrane	BP	1.13e-07	GO:0043269:regulation of ion transport
component_302	Lymphatic_endothelial_cells	GO:0032088	negative regulation of NF-kappaB transcription factor activity	BP	9.75e-07	GO:0009889:regulation of biosynthetic process
component_307	AFP_ALB_positive_cells,Hepatoblasts	GO:0005979	regulation of glycogen biosynthetic process	BP	1.86e-06	GO:0009889:regulation of biosynthetic process
component_307	AFP_ALB_positive_cells,Hepatoblasts	GO:0010962	regulation of glucan biosynthetic process	BP	1.86e-06	GO:0009889:regulation of biosynthetic process
component_307	AFP_ALB_positive_cells,Hepatoblasts	GO:0045725	positive regulation of glycogen biosynthetic process	BP	1.86e-06	GO:0009889:regulation of biosynthetic process
component_307	AFP_ALB_positive_cells,Hepatoblasts	GO:0045429	positive regulation of nitric oxide biosynthetic process	BP	1.85e-07	GO:0009889:regulation of biosynthetic process
component_307	AFP_ALB_positive_cells,Hepatoblasts	GO:0032885	regulation of polysaccharide biosynthetic process	BP	3.93e-07	GO:0009889:regulation of biosynthetic process
component_307	AFP_ALB_positive_cells,Hepatoblasts	GO:0043255	regulation of carbohydrate biosynthetic process	BP	1.71e-06	GO:0009889:regulation of biosynthetic process
component_308	Megakaryocytes	GO:0060907	positive regulation of macrophage cytokine production	BP	3.8e-06	GO:0002682:regulation of immune system process
component_320	Vascular_endothelial_cells	GO:1902808	positive regulation of cell cycle G1/S phase transition	BP	7.62e-08	GO:0051726:regulation of cell cycle
component_320	Vascular_endothelial_cells	GO:1900087	positive regulation of G1/S transition of mitotic cell cycle	BP	9.1e-06	GO:0051726:regulation of cell cycle
component_320	Vascular_endothelial_cells	GO:1901989	positive regulation of cell cycle phase transition	BP	1.43e-08	GO:0051726:regulation of cell cycle
component_320	Vascular_endothelial_cells	GO:1901992	positive regulation of mitotic cell cycle phase transition	BP	1.64e-06	GO:0051726:regulation of cell cycle
component_320	Vascular_endothelial_cells	GO:1902806	regulation of cell cycle G1/S phase transition	BP	3.08e-08	GO:0051726:regulation of cell cycle
component_320	Vascular_endothelial_cells	GO:2000045	regulation of G1/S transition of mitotic cell cycle	BP	8.16e-07	GO:0051726:regulation of cell cycle
component_320	Vascular_endothelial_cells	GO:0090068	positive regulation of cell cycle process	BP	1.18e-08	GO:0051726:regulation of cell cycle
component_320	Vascular_endothelial_cells	GO:0045787	positive regulation of cell cycle	BP	1.18e-08	GO:0051726:regulation of cell cycle
component_320	Vascular_endothelial_cells	GO:1901987	regulation of cell cycle phase transition	BP	7.3e-09	GO:0051726:regulation of cell cycle
component_320	Vascular_endothelial_cells	GO:1901990	regulation of mitotic cell cycle phase transition	BP	4.45e-06	GO:0051726:regulation of cell cycle
component_320	Vascular_endothelial_cells	GO:0010564	regulation of cell cycle process	BP	4.11e-12	GO:0051726:regulation of cell cycle
component_321	Myeloid_cells	GO:0045123	cellular extravasation	BP	2.34e-06	GO:0048870:cell motility
component_323	Lymphoid_cells	GO:0002704	negative regulation of leukocyte mediated immunity	BP	2.78e-07	GO:0002682:regulation of immune system process
component_323	Lymphoid_cells	GO:0002820	negative regulation of adaptive immune response	BP	3.26e-07	GO:0002682:regulation of immune system process
component_323	Lymphoid_cells	GO:0002823	negative regulation of adaptive immune response based on somatic recombination of immune receptors built from immunoglobulin superfamily domains	BP	6.53e-06	GO:0002682:regulation of immune system process
component_323	Lymphoid_cells	GO:0002698	negative regulation of immune effector process	BP	7.24e-07	GO:0002682:regulation of immune system process
component_323	Lymphoid_cells	GO:0002703	regulation of leukocyte mediated immunity	BP	2.04e-09	GO:0002682:regulation of immune system process
component_323	Lymphoid_cells	GO:0030217	T cell differentiation	BP	7.41e-06	GO:0046649:lymphocyte activation
component_323	Lymphoid_cells	GO:0042110	T cell activation	BP	2.04e-09	GO:0046649:lymphocyte activation
component_323	Lymphoid_cells	GO:0050777	negative regulation of immune response	BP	1.3e-06	GO:0002682:regulation of immune system process
component_330	Mesangial_cells	GO:2000145	regulation of cell motility	BP	5.1e-06	GO:0048870:cell motility
component_331	Myeloid_cells	GO:0051547	regulation of keratinocyte migration	BP	8.37e-06	GO:0048870:cell motility
component_331	Myeloid_cells	GO:0051549	positive regulation of keratinocyte migration	BP	8.37e-06	GO:0048870:cell motility
component_332	Vascular_endothelial_cells	GO:0043536	positive regulation of blood vessel endothelial cell migration	BP	3.3e-07	GO:0048870:cell motility
component_332	Vascular_endothelial_cells	GO:0043535	regulation of blood vessel endothelial cell migration	BP	4.7e-09	GO:0048870:cell motility
component_332	Vascular_endothelial_cells	GO:0010595	positive regulation of endothelial cell migration	BP	1.8e-08	GO:0048870:cell motility
component_332	Vascular_endothelial_cells	GO:2000278	regulation of DNA biosynthetic process	BP	7.42e-06	GO:0009889:regulation of biosynthetic process
component_334	Syncytiotrophoblasts_and_villous_cytotrophoblasts,Thymic_epithelial_cells,PDE1C_ACSM3_positive_cells	GO:0035025	positive regulation of Rho protein signal transduction	BP	4.38e-08	GO:0010646:regulation of cell communication
component_334	Syncytiotrophoblasts_and_villous_cytotrophoblasts,Thymic_epithelial_cells,PDE1C_ACSM3_positive_cells	GO:0035025	positive regulation of Rho protein signal transduction	BP	4.38e-08	GO:0009966:regulation of signal transduction
component_334	Syncytiotrophoblasts_and_villous_cytotrophoblasts,Thymic_epithelial_cells,PDE1C_ACSM3_positive_cells	GO:0051057	positive regulation of small GTPase mediated signal transduction	BP	6.5e-08	GO:0010646:regulation of cell communication
component_334	Syncytiotrophoblasts_and_villous_cytotrophoblasts,Thymic_epithelial_cells,PDE1C_ACSM3_positive_cells	GO:0051057	positive regulation of small GTPase mediated signal transduction	BP	6.5e-08	GO:0009966:regulation of signal transduction
component_334	Syncytiotrophoblasts_and_villous_cytotrophoblasts,Thymic_epithelial_cells,PDE1C_ACSM3_positive_cells	GO:0046579	positive regulation of Ras protein signal transduction	BP	1.69e-06	GO:0010646:regulation of cell communication
component_334	Syncytiotrophoblasts_and_villous_cytotrophoblasts,Thymic_epithelial_cells,PDE1C_ACSM3_positive_cells	GO:0046579	positive regulation of Ras protein signal transduction	BP	1.69e-06	GO:0009966:regulation of signal transduction
component_335	ENS_neurons,Visceral_neurons	GO:0050925	negative regulation of negative chemotaxis	BP	7.56e-07	GO:0009605:response to external stimulus
component_335	ENS_neurons,Visceral_neurons	GO:1901021	positive regulation of calcium ion transmembrane transporter activity	BP	4.38e-10	GO:0006816:calcium ion transport
component_335	ENS_neurons,Visceral_neurons	GO:1901021	positive regulation of calcium ion transmembrane transporter activity	BP	4.38e-10	GO:0034765:regulation of ion transmembrane transport
component_335	ENS_neurons,Visceral_neurons	GO:1901021	positive regulation of calcium ion transmembrane transporter activity	BP	4.38e-10	GO:0043269:regulation of ion transport
component_335	ENS_neurons,Visceral_neurons	GO:0098907	regulation of SA node cell action potential	BP	1.06e-06	GO:0010646:regulation of cell communication
component_335	ENS_neurons,Visceral_neurons	GO:0098910	regulation of atrial cardiac muscle cell action potential	BP	1.06e-06	GO:0006937:regulation of muscle contraction
component_335	ENS_neurons,Visceral_neurons	GO:0098910	regulation of atrial cardiac muscle cell action potential	BP	1.06e-06	GO:0070252:actin-mediated cell contraction
component_335	ENS_neurons,Visceral_neurons	GO:0010881	regulation of cardiac muscle contraction by regulation of the release of sequestered calcium ion	BP	1.78e-14	GO:0006816:calcium ion transport
component_335	ENS_neurons,Visceral_neurons	GO:0010881	regulation of cardiac muscle contraction by regulation of the release of sequestered calcium ion	BP	1.78e-14	GO:0006937:regulation of muscle contraction
component_335	ENS_neurons,Visceral_neurons	GO:0010881	regulation of cardiac muscle contraction by regulation of the release of sequestered calcium ion	BP	1.78e-14	GO:0034765:regulation of ion transmembrane transport
component_335	ENS_neurons,Visceral_neurons	GO:0010881	regulation of cardiac muscle contraction by regulation of the release of sequestered calcium ion	BP	1.78e-14	GO:0043269:regulation of ion transport
component_335	ENS_neurons,Visceral_neurons	GO:0010880	regulation of release of sequestered calcium ion into cytosol by sarcoplasmic reticulum	BP	1.78e-14	GO:0006816:calcium ion transport
component_335	ENS_neurons,Visceral_neurons	GO:0010880	regulation of release of sequestered calcium ion into cytosol by sarcoplasmic reticulum	BP	1.78e-14	GO:0034765:regulation of ion transmembrane transport
component_335	ENS_neurons,Visceral_neurons	GO:0010880	regulation of release of sequestered calcium ion into cytosol by sarcoplasmic reticulum	BP	1.78e-14	GO:0043269:regulation of ion transport
component_335	ENS_neurons,Visceral_neurons	GO:2000302	positive regulation of synaptic vesicle exocytosis	BP	9.42e-06	GO:0010646:regulation of cell communication
component_335	ENS_neurons,Visceral_neurons	GO:2000302	positive regulation of synaptic vesicle exocytosis	BP	9.42e-06	GO:0007267:cell-cell signaling
component_335	ENS_neurons,Visceral_neurons	GO:0060134	prepulse inhibition	BP	1.86e-06	GO:0009605:response to external stimulus
component_335	ENS_neurons,Visceral_neurons	GO:0070296	sarcoplasmic reticulum calcium ion transport	BP	3.35e-06	GO:0006816:calcium ion transport
component_344	Ganglion_cells,Visceral_neurons,SATB2_LRRC7_positive_cells	GO:1905150	regulation of voltage-gated sodium channel activity	BP	6.92e-07	GO:0034765:regulation of ion transmembrane transport
component_344	Ganglion_cells,Visceral_neurons,SATB2_LRRC7_positive_cells	GO:1905150	regulation of voltage-gated sodium channel activity	BP	6.92e-07	GO:0043269:regulation of ion transport
component_344	Ganglion_cells,Visceral_neurons,SATB2_LRRC7_positive_cells	GO:0010881	regulation of cardiac muscle contraction by regulation of the release of sequestered calcium ion	BP	4.86e-11	GO:0006816:calcium ion transport
component_344	Ganglion_cells,Visceral_neurons,SATB2_LRRC7_positive_cells	GO:0010881	regulation of cardiac muscle contraction by regulation of the release of sequestered calcium ion	BP	4.86e-11	GO:0006937:regulation of muscle contraction
component_344	Ganglion_cells,Visceral_neurons,SATB2_LRRC7_positive_cells	GO:0010881	regulation of cardiac muscle contraction by regulation of the release of sequestered calcium ion	BP	4.86e-11	GO:0034765:regulation of ion transmembrane transport
component_344	Ganglion_cells,Visceral_neurons,SATB2_LRRC7_positive_cells	GO:0010881	regulation of cardiac muscle contraction by regulation of the release of sequestered calcium ion	BP	4.86e-11	GO:0043269:regulation of ion transport
component_344	Ganglion_cells,Visceral_neurons,SATB2_LRRC7_positive_cells	GO:0010880	regulation of release of sequestered calcium ion into cytosol by sarcoplasmic reticulum	BP	4.86e-11	GO:0006816:calcium ion transport
component_344	Ganglion_cells,Visceral_neurons,SATB2_LRRC7_positive_cells	GO:0010880	regulation of release of sequestered calcium ion into cytosol by sarcoplasmic reticulum	BP	4.86e-11	GO:0034765:regulation of ion transmembrane transport
component_344	Ganglion_cells,Visceral_neurons,SATB2_LRRC7_positive_cells	GO:0010880	regulation of release of sequestered calcium ion into cytosol by sarcoplasmic reticulum	BP	4.86e-11	GO:0043269:regulation of ion transport
component_344	Ganglion_cells,Visceral_neurons,SATB2_LRRC7_positive_cells	GO:0010882	regulation of cardiac muscle contraction by calcium ion signaling	BP	2.69e-10	GO:0006937:regulation of muscle contraction
component_344	Ganglion_cells,Visceral_neurons,SATB2_LRRC7_positive_cells	GO:2000463	positive regulation of excitatory postsynaptic potential	BP	4.27e-06	GO:0010646:regulation of cell communication
component_344	Ganglion_cells,Visceral_neurons,SATB2_LRRC7_positive_cells	GO:2000463	positive regulation of excitatory postsynaptic potential	BP	4.27e-06	GO:0007267:cell-cell signaling
component_344	Ganglion_cells,Visceral_neurons,SATB2_LRRC7_positive_cells	GO:2000463	positive regulation of excitatory postsynaptic potential	BP	4.27e-06	GO:0009966:regulation of signal transduction
component_344	Ganglion_cells,Visceral_neurons,SATB2_LRRC7_positive_cells	GO:2000649	regulation of sodium ion transmembrane transporter activity	BP	5.95e-11	GO:0034765:regulation of ion transmembrane transport
component_344	Ganglion_cells,Visceral_neurons,SATB2_LRRC7_positive_cells	GO:2000649	regulation of sodium ion transmembrane transporter activity	BP	5.95e-11	GO:0043269:regulation of ion transport
component_344	Ganglion_cells,Visceral_neurons,SATB2_LRRC7_positive_cells	GO:0051279	regulation of release of sequestered calcium ion into cytosol	BP	2.13e-08	GO:0006816:calcium ion transport
component_344	Ganglion_cells,Visceral_neurons,SATB2_LRRC7_positive_cells	GO:0051279	regulation of release of sequestered calcium ion into cytosol	BP	2.13e-08	GO:0034765:regulation of ion transmembrane transport
component_344	Ganglion_cells,Visceral_neurons,SATB2_LRRC7_positive_cells	GO:0051279	regulation of release of sequestered calcium ion into cytosol	BP	2.13e-08	GO:0043269:regulation of ion transport
component_344	Ganglion_cells,Visceral_neurons,SATB2_LRRC7_positive_cells	GO:0001764	neuron migration	BP	7.2e-09	GO:0048870:cell motility
component_351	Smooth_muscle_cells	GO:1904753	negative regulation of vascular associated smooth muscle cell migration	BP	1.72e-06	GO:0048870:cell motility
component_351	Smooth_muscle_cells	GO:1901017	negative regulation of potassium ion transmembrane transporter activity	BP	3.82e-06	GO:0034765:regulation of ion transmembrane transport
component_351	Smooth_muscle_cells	GO:1901017	negative regulation of potassium ion transmembrane transporter activity	BP	3.82e-06	GO:0043269:regulation of ion transport
component_351	Smooth_muscle_cells	GO:1903817	negative regulation of voltage-gated potassium channel activity	BP	3.82e-06	GO:0034765:regulation of ion transmembrane transport
component_351	Smooth_muscle_cells	GO:1903817	negative regulation of voltage-gated potassium channel activity	BP	3.82e-06	GO:0043269:regulation of ion transport
component_351	Smooth_muscle_cells	GO:1901380	negative regulation of potassium ion transmembrane transport	BP	3.82e-06	GO:0034765:regulation of ion transmembrane transport
component_351	Smooth_muscle_cells	GO:1901380	negative regulation of potassium ion transmembrane transport	BP	3.82e-06	GO:0043269:regulation of ion transport
component_351	Smooth_muscle_cells	GO:0030512	negative regulation of transforming growth factor beta receptor signaling pathway	BP	3.05e-11	GO:0010646:regulation of cell communication
component_351	Smooth_muscle_cells	GO:0030512	negative regulation of transforming growth factor beta receptor signaling pathway	BP	3.05e-11	GO:0009966:regulation of signal transduction
component_367	Lymphoid_cells	GO:0030101	natural killer cell activation	BP	8.7e-11	GO:0046649:lymphocyte activation
component_367	Lymphoid_cells	GO:0038094	Fc-gamma receptor signaling pathway	BP	8.5e-08	GO:0002682:regulation of immune system process
component_367	Lymphoid_cells	GO:0002431	Fc receptor mediated stimulatory signaling pathway	BP	2.99e-06	GO:0002682:regulation of immune system process
component_367	Lymphoid_cells	GO:0002431	Fc receptor mediated stimulatory signaling pathway	BP	2.99e-06	GO:0002757:immune response-activating signal transduction
component_367	Lymphoid_cells	GO:0050853	B cell receptor signaling pathway	BP	7.96e-17	GO:0002682:regulation of immune system process
component_367	Lymphoid_cells	GO:0050853	B cell receptor signaling pathway	BP	7.96e-17	GO:0002757:immune response-activating signal transduction
component_367	Lymphoid_cells	GO:0050851	antigen receptor-mediated signaling pathway	BP	3.83e-31	GO:0002682:regulation of immune system process
component_367	Lymphoid_cells	GO:0050851	antigen receptor-mediated signaling pathway	BP	3.83e-31	GO:0002757:immune response-activating signal transduction
component_367	Lymphoid_cells	GO:0038093	Fc receptor signaling pathway	BP	1.41e-10	GO:0002682:regulation of immune system process
component_367	Lymphoid_cells	GO:2000516	positive regulation of CD4-positive, alpha-beta T cell activation	BP	5.63e-06	GO:0046649:lymphocyte activation
component_367	Lymphoid_cells	GO:2000516	positive regulation of CD4-positive, alpha-beta T cell activation	BP	5.63e-06	GO:0002682:regulation of immune system process
component_367	Lymphoid_cells	GO:0002768	immune response-regulating cell surface receptor signaling pathway	BP	8.18e-43	GO:0002682:regulation of immune system process
component_367	Lymphoid_cells	GO:0002757	immune response-activating signal transduction	BP	4.94e-37	GO:0002682:regulation of immune system process
component_367	Lymphoid_cells	GO:0002757	immune response-activating signal transduction	BP	4.94e-37	GO:0002757:immune response-activating signal transduction
component_367	Lymphoid_cells	GO:0002429	immune response-activating cell surface receptor signaling pathway	BP	4.94e-37	GO:0002682:regulation of immune system process
component_367	Lymphoid_cells	GO:0002429	immune response-activating cell surface receptor signaling pathway	BP	4.94e-37	GO:0002757:immune response-activating signal transduction
component_367	Lymphoid_cells	GO:0050852	T cell receptor signaling pathway	BP	5.28e-17	GO:0002682:regulation of immune system process
component_367	Lymphoid_cells	GO:0050852	T cell receptor signaling pathway	BP	5.28e-17	GO:0002757:immune response-activating signal transduction
component_367	Lymphoid_cells	GO:0002758	innate immune response-activating signal transduction	BP	1.1e-06	GO:0002682:regulation of immune system process
component_367	Lymphoid_cells	GO:0002758	innate immune response-activating signal transduction	BP	1.1e-06	GO:0009605:response to external stimulus
component_367	Lymphoid_cells	GO:0002758	innate immune response-activating signal transduction	BP	1.1e-06	GO:0002757:immune response-activating signal transduction
component_367	Lymphoid_cells	GO:0002764	immune response-regulating signaling pathway	BP	4.39e-42	GO:0002682:regulation of immune system process
component_367	Lymphoid_cells	GO:0042110	T cell activation	BP	1.54e-26	GO:0046649:lymphocyte activation
component_367	Lymphoid_cells	GO:0046635	positive regulation of alpha-beta T cell activation	BP	1.73e-06	GO:0046649:lymphocyte activation
component_367	Lymphoid_cells	GO:0046635	positive regulation of alpha-beta T cell activation	BP	1.73e-06	GO:0002682:regulation of immune system process
component_367	Lymphoid_cells	GO:0030217	T cell differentiation	BP	8.38e-15	GO:0046649:lymphocyte activation
component_367	Lymphoid_cells	GO:0050854	regulation of antigen receptor-mediated signaling pathway	BP	2.67e-06	GO:0002682:regulation of immune system process
component_367	Lymphoid_cells	GO:0050854	regulation of antigen receptor-mediated signaling pathway	BP	2.67e-06	GO:0010646:regulation of cell communication
component_367	Lymphoid_cells	GO:0050854	regulation of antigen receptor-mediated signaling pathway	BP	2.67e-06	GO:0002757:immune response-activating signal transduction
component_367	Lymphoid_cells	GO:0050854	regulation of antigen receptor-mediated signaling pathway	BP	2.67e-06	GO:0009966:regulation of signal transduction
component_367	Lymphoid_cells	GO:0046649	lymphocyte activation	BP	1.89e-40	GO:0046649:lymphocyte activation
component_367	Lymphoid_cells	GO:2000514	regulation of CD4-positive, alpha-beta T cell activation	BP	3.12e-07	GO:0046649:lymphocyte activation
component_367	Lymphoid_cells	GO:2000514	regulation of CD4-positive, alpha-beta T cell activation	BP	3.12e-07	GO:0002682:regulation of immune system process
component_374	Megakaryocytes	GO:0071071	regulation of phospholipid biosynthetic process	BP	2.9e-06	GO:0044255:cellular lipid metabolic process
component_374	Megakaryocytes	GO:0071071	regulation of phospholipid biosynthetic process	BP	2.9e-06	GO:0009889:regulation of biosynthetic process
component_374	Megakaryocytes	GO:0032885	regulation of polysaccharide biosynthetic process	BP	1.55e-06	GO:0009889:regulation of biosynthetic process
component_374	Megakaryocytes	GO:0043255	regulation of carbohydrate biosynthetic process	BP	6.25e-06	GO:0009889:regulation of biosynthetic process
component_375	Microglia	GO:0002758	innate immune response-activating signal transduction	BP	1.27e-06	GO:0002682:regulation of immune system process
component_375	Microglia	GO:0002758	innate immune response-activating signal transduction	BP	1.27e-06	GO:0009605:response to external stimulus
component_375	Microglia	GO:0002758	innate immune response-activating signal transduction	BP	1.27e-06	GO:0002757:immune response-activating signal transduction
component_375	Microglia	GO:0046651	lymphocyte proliferation	BP	2.72e-06	GO:0046649:lymphocyte activation
component_375	Microglia	GO:0002218	activation of innate immune response	BP	9.5e-06	GO:0002682:regulation of immune system process
component_375	Microglia	GO:0002218	activation of innate immune response	BP	9.5e-06	GO:0009605:response to external stimulus
component_377	Vascular_endothelial_cells	GO:0010512	negative regulation of phosphatidylinositol biosynthetic process	BP	7.44e-06	GO:0044255:cellular lipid metabolic process
component_377	Vascular_endothelial_cells	GO:0010512	negative regulation of phosphatidylinositol biosynthetic process	BP	7.44e-06	GO:0009889:regulation of biosynthetic process
component_377	Vascular_endothelial_cells	GO:0071072	negative regulation of phospholipid biosynthetic process	BP	7.44e-06	GO:0044255:cellular lipid metabolic process
component_377	Vascular_endothelial_cells	GO:0071072	negative regulation of phospholipid biosynthetic process	BP	7.44e-06	GO:0009889:regulation of biosynthetic process
component_377	Vascular_endothelial_cells	GO:0150140	regulation of CD86 production	BP	9.67e-06	GO:0009889:regulation of biosynthetic process
component_377	Vascular_endothelial_cells	GO:0150143	regulation of CD80 production	BP	9.67e-06	GO:0009889:regulation of biosynthetic process
component_377	Vascular_endothelial_cells	GO:0150142	positive regulation of CD86 production	BP	9.67e-06	GO:0009889:regulation of biosynthetic process
component_377	Vascular_endothelial_cells	GO:0150145	positive regulation of CD80 production	BP	9.67e-06	GO:0009889:regulation of biosynthetic process
component_377	Vascular_endothelial_cells	GO:0038001	paracrine signaling	BP	1.19e-10	GO:0007267:cell-cell signaling
component_377	Vascular_endothelial_cells	GO:1901979	regulation of inward rectifier potassium channel activity	BP	1.95e-10	GO:0034765:regulation of ion transmembrane transport
component_377	Vascular_endothelial_cells	GO:1901979	regulation of inward rectifier potassium channel activity	BP	1.95e-10	GO:0043269:regulation of ion transport
component_377	Vascular_endothelial_cells	GO:0090331	negative regulation of platelet aggregation	BP	6.07e-10	GO:0030168:platelet activation
component_377	Vascular_endothelial_cells	GO:0090331	negative regulation of platelet aggregation	BP	6.07e-10	GO:0009605:response to external stimulus
component_377	Vascular_endothelial_cells	GO:0045019	negative regulation of nitric oxide biosynthetic process	BP	4.5e-09	GO:0009889:regulation of biosynthetic process
component_377	Vascular_endothelial_cells	GO:2001028	positive regulation of endothelial cell chemotaxis	BP	4.96e-09	GO:0048870:cell motility
component_377	Vascular_endothelial_cells	GO:2001028	positive regulation of endothelial cell chemotaxis	BP	4.96e-09	GO:0009605:response to external stimulus
component_379	ENS_neurons,Visceral_neurons	GO:0051971	positive regulation of transmission of nerve impulse	BP	8.78e-06	GO:0010646:regulation of cell communication
component_379	ENS_neurons,Visceral_neurons	GO:2001260	regulation of semaphorin-plexin signaling pathway	BP	1.06e-10	GO:0010646:regulation of cell communication
component_379	ENS_neurons,Visceral_neurons	GO:2001260	regulation of semaphorin-plexin signaling pathway	BP	1.06e-10	GO:0009966:regulation of signal transduction
component_379	ENS_neurons,Visceral_neurons	GO:0003357	noradrenergic neuron differentiation	BP	6.75e-16	GO:0030182:neuron differentiation
component_379	ENS_neurons,Visceral_neurons	GO:0032095	regulation of response to food	BP	1.25e-07	GO:0009605:response to external stimulus
component_379	ENS_neurons,Visceral_neurons	GO:0071542	dopaminergic neuron differentiation	BP	1.45e-07	GO:0030182:neuron differentiation
component_379	ENS_neurons,Visceral_neurons	GO:1900738	positive regulation of phospholipase C-activating G protein-coupled receptor signaling pathway	BP	2.68e-07	GO:0010646:regulation of cell communication
component_379	ENS_neurons,Visceral_neurons	GO:1900738	positive regulation of phospholipase C-activating G protein-coupled receptor signaling pathway	BP	2.68e-07	GO:0009966:regulation of signal transduction
component_379	ENS_neurons,Visceral_neurons	GO:1900736	regulation of phospholipase C-activating G protein-coupled receptor signaling pathway	BP	2.68e-07	GO:0010646:regulation of cell communication
component_379	ENS_neurons,Visceral_neurons	GO:1900736	regulation of phospholipase C-activating G protein-coupled receptor signaling pathway	BP	2.68e-07	GO:0009966:regulation of signal transduction
component_379	ENS_neurons,Visceral_neurons	GO:1902255	positive regulation of intrinsic apoptotic signaling pathway by p53 class mediator	BP	5.64e-09	GO:0010646:regulation of cell communication
component_379	ENS_neurons,Visceral_neurons	GO:1902255	positive regulation of intrinsic apoptotic signaling pathway by p53 class mediator	BP	5.64e-09	GO:0009966:regulation of signal transduction
component_396	Stromal_cells	GO:0030334	regulation of cell migration	BP	3.71e-09	GO:0048870:cell motility
component_396	Stromal_cells	GO:2000145	regulation of cell motility	BP	3.71e-09	GO:0048870:cell motility
component_403	Stromal_cells	GO:0090263	positive regulation of canonical Wnt signaling pathway	BP	7.47e-08	GO:0010646:regulation of cell communication
component_403	Stromal_cells	GO:0090263	positive regulation of canonical Wnt signaling pathway	BP	7.47e-08	GO:0009966:regulation of signal transduction
component_403	Stromal_cells	GO:0030177	positive regulation of Wnt signaling pathway	BP	1.83e-07	GO:0010646:regulation of cell communication
component_403	Stromal_cells	GO:0030177	positive regulation of Wnt signaling pathway	BP	1.83e-07	GO:0009966:regulation of signal transduction
component_405	ENS_glia	GO:0055023	positive regulation of cardiac muscle tissue growth	BP	9.1e-06	GO:0045927:positive regulation of growth
component_405	ENS_glia	GO:0060045	positive regulation of cardiac muscle cell proliferation	BP	9.1e-06	GO:0045927:positive regulation of growth
component_405	ENS_glia	GO:2001259	positive regulation of cation channel activity	BP	9.23e-07	GO:0034765:regulation of ion transmembrane transport
component_405	ENS_glia	GO:2001259	positive regulation of cation channel activity	BP	9.23e-07	GO:0043269:regulation of ion transport
component_405	ENS_glia	GO:1904752	regulation of vascular associated smooth muscle cell migration	BP	1.44e-06	GO:0048870:cell motility
component_405	ENS_glia	GO:0001764	neuron migration	BP	6.77e-08	GO:0048870:cell motility
component_405	ENS_glia	GO:0014912	negative regulation of smooth muscle cell migration	BP	2.67e-06	GO:0048870:cell motility
component_405	ENS_glia	GO:0043536	positive regulation of blood vessel endothelial cell migration	BP	2.93e-06	GO:0048870:cell motility
component_407	Megakaryocytes	GO:0032885	regulation of polysaccharide biosynthetic process	BP	9.91e-07	GO:0009889:regulation of biosynthetic process
component_407	Megakaryocytes	GO:0043255	regulation of carbohydrate biosynthetic process	BP	4.09e-06	GO:0009889:regulation of biosynthetic process
component_409	Vascular_endothelial_cells	GO:2000145	regulation of cell motility	BP	1.05e-12	GO:0048870:cell motility
component_409	Vascular_endothelial_cells	GO:0030334	regulation of cell migration	BP	2.12e-12	GO:0048870:cell motility
component_413	Bronchiolar_and_alveolar_epithelial_cells,Ureteric_bud_cells,Goblet_cells	GO:1902254	negative regulation of intrinsic apoptotic signaling pathway by p53 class mediator	BP	1.43e-07	GO:0010646:regulation of cell communication
component_413	Bronchiolar_and_alveolar_epithelial_cells,Ureteric_bud_cells,Goblet_cells	GO:1902254	negative regulation of intrinsic apoptotic signaling pathway by p53 class mediator	BP	1.43e-07	GO:0009966:regulation of signal transduction
component_413	Bronchiolar_and_alveolar_epithelial_cells,Ureteric_bud_cells,Goblet_cells	GO:1901797	negative regulation of signal transduction by p53 class mediator	BP	1.43e-07	GO:0010646:regulation of cell communication
component_413	Bronchiolar_and_alveolar_epithelial_cells,Ureteric_bud_cells,Goblet_cells	GO:1901797	negative regulation of signal transduction by p53 class mediator	BP	1.43e-07	GO:0009966:regulation of signal transduction
component_413	Bronchiolar_and_alveolar_epithelial_cells,Ureteric_bud_cells,Goblet_cells	GO:1902166	negative regulation of intrinsic apoptotic signaling pathway in response to DNA damage by p53 class mediator	BP	1.43e-07	GO:0006974:cellular response to DNA damage stimulus
component_413	Bronchiolar_and_alveolar_epithelial_cells,Ureteric_bud_cells,Goblet_cells	GO:1902166	negative regulation of intrinsic apoptotic signaling pathway in response to DNA damage by p53 class mediator	BP	1.43e-07	GO:0010646:regulation of cell communication
component_413	Bronchiolar_and_alveolar_epithelial_cells,Ureteric_bud_cells,Goblet_cells	GO:1902166	negative regulation of intrinsic apoptotic signaling pathway in response to DNA damage by p53 class mediator	BP	1.43e-07	GO:0009966:regulation of signal transduction
component_415	Skeletal_muscle_cells,Cardiomyocytes,ELF3_AGBL2_positive_cells	GO:0030049	muscle filament sliding	BP	1.36e-09	GO:0070252:actin-mediated cell contraction
component_415	Skeletal_muscle_cells,Cardiomyocytes,ELF3_AGBL2_positive_cells	GO:0033275	actin-myosin filament sliding	BP	1.36e-09	GO:0070252:actin-mediated cell contraction
component_415	Skeletal_muscle_cells,Cardiomyocytes,ELF3_AGBL2_positive_cells	GO:0043517	positive regulation of DNA damage response, signal transduction by p53 class mediator	BP	5.4e-07	GO:0006974:cellular response to DNA damage stimulus
component_415	Skeletal_muscle_cells,Cardiomyocytes,ELF3_AGBL2_positive_cells	GO:0043517	positive regulation of DNA damage response, signal transduction by p53 class mediator	BP	5.4e-07	GO:0010646:regulation of cell communication
component_415	Skeletal_muscle_cells,Cardiomyocytes,ELF3_AGBL2_positive_cells	GO:0043517	positive regulation of DNA damage response, signal transduction by p53 class mediator	BP	5.4e-07	GO:0009966:regulation of signal transduction
component_415	Skeletal_muscle_cells,Cardiomyocytes,ELF3_AGBL2_positive_cells	GO:0035995	detection of muscle stretch	BP	1.51e-06	GO:0051606:detection of stimulus
component_415	Skeletal_muscle_cells,Cardiomyocytes,ELF3_AGBL2_positive_cells	GO:0035995	detection of muscle stretch	BP	1.51e-06	GO:0009605:response to external stimulus
component_420	Lymphoid_cells	GO:0002423	natural killer cell mediated immune response to tumor cell	BP	1.35e-06	GO:0009605:response to external stimulus
component_420	Lymphoid_cells	GO:0043320	natural killer cell degranulation	BP	1.35e-06	GO:0046649:lymphocyte activation
component_420	Lymphoid_cells	GO:0002420	natural killer cell mediated cytotoxicity directed against tumor cell target	BP	1.35e-06	GO:0009605:response to external stimulus
component_420	Lymphoid_cells	GO:0002323	natural killer cell activation involved in immune response	BP	1.76e-06	GO:0046649:lymphocyte activation
component_420	Lymphoid_cells	GO:0007172	signal complex assembly	BP	2.93e-06	GO:0010646:regulation of cell communication
component_420	Lymphoid_cells	GO:0007172	signal complex assembly	BP	2.93e-06	GO:0009966:regulation of signal transduction
component_420	Lymphoid_cells	GO:0030101	natural killer cell activation	BP	1.82e-25	GO:0046649:lymphocyte activation
component_420	Lymphoid_cells	GO:0050857	positive regulation of antigen receptor-mediated signaling pathway	BP	2.07e-09	GO:0002682:regulation of immune system process
component_420	Lymphoid_cells	GO:0050857	positive regulation of antigen receptor-mediated signaling pathway	BP	2.07e-09	GO:0010646:regulation of cell communication
component_420	Lymphoid_cells	GO:0050857	positive regulation of antigen receptor-mediated signaling pathway	BP	2.07e-09	GO:0002757:immune response-activating signal transduction
component_420	Lymphoid_cells	GO:0050857	positive regulation of antigen receptor-mediated signaling pathway	BP	2.07e-09	GO:0009966:regulation of signal transduction
component_420	Lymphoid_cells	GO:0001779	natural killer cell differentiation	BP	2.71e-09	GO:0046649:lymphocyte activation
component_420	Lymphoid_cells	GO:0002228	natural killer cell mediated immunity	BP	7.16e-06	GO:0009605:response to external stimulus
component_420	Lymphoid_cells	GO:0042267	natural killer cell mediated cytotoxicity	BP	7.16e-06	GO:0009605:response to external stimulus
component_420	Lymphoid_cells	GO:0046627	negative regulation of insulin receptor signaling pathway	BP	3.56e-08	GO:0010646:regulation of cell communication
component_420	Lymphoid_cells	GO:0046627	negative regulation of insulin receptor signaling pathway	BP	3.56e-08	GO:0009966:regulation of signal transduction
component_421	Vascular_endothelial_cells	GO:1900087	positive regulation of G1/S transition of mitotic cell cycle	BP	7.88e-06	GO:0051726:regulation of cell cycle
component_422	Myeloid_cells	GO:0062208	positive regulation of pattern recognition receptor signaling pathway	BP	8.47e-06	GO:0002682:regulation of immune system process
component_422	Myeloid_cells	GO:0062208	positive regulation of pattern recognition receptor signaling pathway	BP	8.47e-06	GO:0010646:regulation of cell communication
component_422	Myeloid_cells	GO:0062208	positive regulation of pattern recognition receptor signaling pathway	BP	8.47e-06	GO:0009966:regulation of signal transduction
component_429	Stromal_cells,Stellate_cells	GO:0050923	regulation of negative chemotaxis	BP	5.7e-07	GO:0009605:response to external stimulus
component_429	Stromal_cells,Stellate_cells	GO:0070099	regulation of chemokine-mediated signaling pathway	BP	8.97e-06	GO:0010646:regulation of cell communication
component_429	Stromal_cells,Stellate_cells	GO:0070099	regulation of chemokine-mediated signaling pathway	BP	8.97e-06	GO:0009966:regulation of signal transduction
component_429	Stromal_cells,Stellate_cells	GO:0070100	negative regulation of chemokine-mediated signaling pathway	BP	8.97e-06	GO:0010646:regulation of cell communication
component_429	Stromal_cells,Stellate_cells	GO:0070100	negative regulation of chemokine-mediated signaling pathway	BP	8.97e-06	GO:0009966:regulation of signal transduction
component_431	Lymphoid_cells	GO:0032816	positive regulation of natural killer cell activation	BP	2.04e-07	GO:0046649:lymphocyte activation
component_431	Lymphoid_cells	GO:0032816	positive regulation of natural killer cell activation	BP	2.04e-07	GO:0002682:regulation of immune system process
component_431	Lymphoid_cells	GO:0032814	regulation of natural killer cell activation	BP	4.35e-06	GO:0046649:lymphocyte activation
component_431	Lymphoid_cells	GO:0032814	regulation of natural killer cell activation	BP	4.35e-06	GO:0002682:regulation of immune system process
component_433	Vascular_endothelial_cells	GO:0030336	negative regulation of cell migration	BP	6.99e-06	GO:0048870:cell motility
component_433	Vascular_endothelial_cells	GO:2000145	regulation of cell motility	BP	7.56e-13	GO:0048870:cell motility
component_433	Vascular_endothelial_cells	GO:0030334	regulation of cell migration	BP	1.53e-12	GO:0048870:cell motility
component_442	Smooth_muscle_cells	GO:0010558	negative regulation of macromolecule biosynthetic process	BP	1.07e-06	GO:0009889:regulation of biosynthetic process
component_442	Smooth_muscle_cells	GO:1903507	negative regulation of nucleic acid-templated transcription	BP	7.26e-06	GO:0009889:regulation of biosynthetic process
component_442	Smooth_muscle_cells	GO:0045892	negative regulation of transcription, DNA-templated	BP	7.26e-06	GO:0009889:regulation of biosynthetic process
component_442	Smooth_muscle_cells	GO:1902679	negative regulation of RNA biosynthetic process	BP	7.96e-06	GO:0009889:regulation of biosynthetic process
component_444	Vascular_endothelial_cells	GO:0014066	regulation of phosphatidylinositol 3-kinase signaling	BP	9.36e-07	GO:0010646:regulation of cell communication
component_444	Vascular_endothelial_cells	GO:0014066	regulation of phosphatidylinositol 3-kinase signaling	BP	9.36e-07	GO:0009966:regulation of signal transduction
component_444	Vascular_endothelial_cells	GO:0010595	positive regulation of endothelial cell migration	BP	4.11e-09	GO:0048870:cell motility
component_444	Vascular_endothelial_cells	GO:0010631	epithelial cell migration	BP	9.88e-08	GO:0048870:cell motility
component_444	Vascular_endothelial_cells	GO:0001667	ameboidal-type cell migration	BP	4.2e-08	GO:0048870:cell motility
component_444	Vascular_endothelial_cells	GO:0010634	positive regulation of epithelial cell migration	BP	2.57e-08	GO:0048870:cell motility
component_446	Vascular_endothelial_cells	GO:0000122	negative regulation of transcription by RNA polymerase II	BP	6.12e-07	GO:0009889:regulation of biosynthetic process
component_454	Erythroblasts	GO:0002293	alpha-beta T cell differentiation involved in immune response	BP	5.5e-06	GO:0046649:lymphocyte activation
component_467	CCL19_CCL21_positive_cells	GO:0030334	regulation of cell migration	BP	4.63e-07	GO:0048870:cell motility
component_467	CCL19_CCL21_positive_cells	GO:2000145	regulation of cell motility	BP	4.17e-07	GO:0048870:cell motility
component_469	Vascular_endothelial_cells	GO:0001764	neuron migration	BP	2.63e-07	GO:0048870:cell motility
component_486	Schwann_cells	GO:0031670	cellular response to nutrient	BP	4.65e-08	GO:0009605:response to external stimulus
component_486	Schwann_cells	GO:1904752	regulation of vascular associated smooth muscle cell migration	BP	2.08e-07	GO:0048870:cell motility
component_486	Schwann_cells	GO:0014912	negative regulation of smooth muscle cell migration	BP	3.75e-07	GO:0048870:cell motility
component_486	Schwann_cells	GO:0010596	negative regulation of endothelial cell migration	BP	6.38e-06	GO:0048870:cell motility
component_489	Stromal_cells	GO:0045579	positive regulation of B cell differentiation	BP	1.82e-07	GO:0046649:lymphocyte activation
component_489	Stromal_cells	GO:0045579	positive regulation of B cell differentiation	BP	1.82e-07	GO:0002682:regulation of immune system process
component_489	Stromal_cells	GO:0071295	cellular response to vitamin	BP	1.93e-07	GO:0009605:response to external stimulus
component_489	Stromal_cells	GO:0071307	cellular response to vitamin K	BP	1.93e-07	GO:0009605:response to external stimulus
component_489	Stromal_cells	GO:0032571	response to vitamin K	BP	1.93e-07	GO:0009605:response to external stimulus
component_489	Stromal_cells	GO:0150102	negative regulation of monocyte activation	BP	1.98e-07	GO:0002682:regulation of immune system process
component_489	Stromal_cells	GO:1904237	positive regulation of substrate-dependent cell migration, cell attachment to substrate	BP	1.98e-07	GO:0048870:cell motility
component_489	Stromal_cells	GO:1904235	regulation of substrate-dependent cell migration, cell attachment to substrate	BP	1.98e-07	GO:0048870:cell motility
component_489	Stromal_cells	GO:0042074	cell migration involved in gastrulation	BP	2e-07	GO:0048870:cell motility
component_489	Stromal_cells	GO:1901164	negative regulation of trophoblast cell migration	BP	2e-07	GO:0048870:cell motility
component_489	Stromal_cells	GO:0035582	sequestering of BMP in extracellular matrix	BP	2.21e-07	GO:0010646:regulation of cell communication
component_489	Stromal_cells	GO:0035582	sequestering of BMP in extracellular matrix	BP	2.21e-07	GO:0009966:regulation of signal transduction
component_493	ENS_glia	GO:0048843	negative regulation of axon extension involved in axon guidance	BP	5.18e-06	GO:0009605:response to external stimulus
component_494	Megakaryocytes	GO:1904753	negative regulation of vascular associated smooth muscle cell migration	BP	2.87e-07	GO:0048870:cell motility
component_494	Megakaryocytes	GO:0090330	regulation of platelet aggregation	BP	1.72e-11	GO:0030168:platelet activation
component_494	Megakaryocytes	GO:0030168	platelet activation	BP	1.9e-11	GO:0030168:platelet activation
component_504	Vascular_endothelial_cells	GO:0010594	regulation of endothelial cell migration	BP	1.07e-06	GO:0048870:cell motility
component_504	Vascular_endothelial_cells	GO:0010632	regulation of epithelial cell migration	BP	2.73e-06	GO:0048870:cell motility
component_504	Vascular_endothelial_cells	GO:0030336	negative regulation of cell migration	BP	1.76e-06	GO:0048870:cell motility
component_504	Vascular_endothelial_cells	GO:2000146	negative regulation of cell motility	BP	3.14e-06	GO:0048870:cell motility
component_504	Vascular_endothelial_cells	GO:2000145	regulation of cell motility	BP	4.97e-14	GO:0048870:cell motility
component_504	Vascular_endothelial_cells	GO:0030334	regulation of cell migration	BP	1.69e-13	GO:0048870:cell motility
component_508	Mesothelial_cells,Epicardial_fat_cells	GO:0050923	regulation of negative chemotaxis	BP	5.12e-08	GO:0009605:response to external stimulus
component_508	Mesothelial_cells,Epicardial_fat_cells	GO:0070099	regulation of chemokine-mediated signaling pathway	BP	1.01e-06	GO:0010646:regulation of cell communication
component_508	Mesothelial_cells,Epicardial_fat_cells	GO:0070099	regulation of chemokine-mediated signaling pathway	BP	1.01e-06	GO:0009966:regulation of signal transduction
component_508	Mesothelial_cells,Epicardial_fat_cells	GO:0070100	negative regulation of chemokine-mediated signaling pathway	BP	1.01e-06	GO:0010646:regulation of cell communication
component_508	Mesothelial_cells,Epicardial_fat_cells	GO:0070100	negative regulation of chemokine-mediated signaling pathway	BP	1.01e-06	GO:0009966:regulation of signal transduction
component_516	Lymphatic_endothelial_cells	GO:0003056	regulation of vascular associated smooth muscle contraction	BP	4.39e-07	GO:0006937:regulation of muscle contraction
component_516	Lymphatic_endothelial_cells	GO:2001238	positive regulation of extrinsic apoptotic signaling pathway	BP	1.38e-06	GO:0010646:regulation of cell communication
component_516	Lymphatic_endothelial_cells	GO:2001238	positive regulation of extrinsic apoptotic signaling pathway	BP	1.38e-06	GO:0009966:regulation of signal transduction
component_516	Lymphatic_endothelial_cells	GO:0006940	regulation of smooth muscle contraction	BP	1.34e-07	GO:0006937:regulation of muscle contraction
component_516	Lymphatic_endothelial_cells	GO:0032885	regulation of polysaccharide biosynthetic process	BP	3.15e-06	GO:0009889:regulation of biosynthetic process
component_516	Lymphatic_endothelial_cells	GO:0032088	negative regulation of NF-kappaB transcription factor activity	BP	9.99e-09	GO:0009889:regulation of biosynthetic process
component_525	Smooth_muscle_cells	GO:2000145	regulation of cell motility	BP	2.49e-07	GO:0048870:cell motility
component_531	CSH1_CSH2_positive_cells,Trophoblast_giant_cells	GO:1902895	positive regulation of miRNA transcription	BP	4.31e-07	GO:0009889:regulation of biosynthetic process
component_531	CSH1_CSH2_positive_cells,Trophoblast_giant_cells	GO:1902893	regulation of miRNA transcription	BP	4.31e-07	GO:0009889:regulation of biosynthetic process
component_531	CSH1_CSH2_positive_cells,Trophoblast_giant_cells	GO:0070373	negative regulation of ERK1 and ERK2 cascade	BP	2.91e-08	GO:0010646:regulation of cell communication
component_531	CSH1_CSH2_positive_cells,Trophoblast_giant_cells	GO:0070373	negative regulation of ERK1 and ERK2 cascade	BP	2.91e-08	GO:0009966:regulation of signal transduction
component_531	CSH1_CSH2_positive_cells,Trophoblast_giant_cells	GO:0010862	positive regulation of pathway-restricted SMAD protein phosphorylation	BP	5.49e-09	GO:0010646:regulation of cell communication
component_531	CSH1_CSH2_positive_cells,Trophoblast_giant_cells	GO:0010862	positive regulation of pathway-restricted SMAD protein phosphorylation	BP	5.49e-09	GO:0009966:regulation of signal transduction
component_535	Megakaryocytes	GO:0000077	DNA damage checkpoint signaling	BP	4.37e-10	GO:0006974:cellular response to DNA damage stimulus
component_535	Megakaryocytes	GO:0000077	DNA damage checkpoint signaling	BP	4.37e-10	GO:0051726:regulation of cell cycle
component_535	Megakaryocytes	GO:0031570	DNA integrity checkpoint signaling	BP	4.37e-10	GO:0051726:regulation of cell cycle
component_537	Vascular_endothelial_cells	GO:0010595	positive regulation of endothelial cell migration	BP	1.39e-06	GO:0048870:cell motility
component_537	Vascular_endothelial_cells	GO:0010594	regulation of endothelial cell migration	BP	8.59e-08	GO:0048870:cell motility
component_549	Chromaffin_cells,Sympathoblasts	GO:0032095	regulation of response to food	BP	5.11e-06	GO:0009605:response to external stimulus
component_549	Chromaffin_cells,Sympathoblasts	GO:0003357	noradrenergic neuron differentiation	BP	3.57e-07	GO:0030182:neuron differentiation
component_549	Chromaffin_cells,Sympathoblasts	GO:0043409	negative regulation of MAPK cascade	BP	3.3e-06	GO:0010646:regulation of cell communication
component_549	Chromaffin_cells,Sympathoblasts	GO:0043409	negative regulation of MAPK cascade	BP	3.3e-06	GO:0009966:regulation of signal transduction
component_553	Vascular_endothelial_cells	GO:2000145	regulation of cell motility	BP	2.86e-08	GO:0048870:cell motility
component_553	Vascular_endothelial_cells	GO:0030334	regulation of cell migration	BP	1.02e-07	GO:0048870:cell motility
component_558	Visceral_neurons,SATB2_LRRC7_positive_cells,Ganglion_cells	GO:2001260	regulation of semaphorin-plexin signaling pathway	BP	2.55e-06	GO:0010646:regulation of cell communication
component_558	Visceral_neurons,SATB2_LRRC7_positive_cells,Ganglion_cells	GO:2001260	regulation of semaphorin-plexin signaling pathway	BP	2.55e-06	GO:0009966:regulation of signal transduction
component_558	Visceral_neurons,SATB2_LRRC7_positive_cells,Ganglion_cells	GO:0003357	noradrenergic neuron differentiation	BP	1.63e-08	GO:0030182:neuron differentiation
component_560	Vascular_endothelial_cells	GO:0051056	regulation of small GTPase mediated signal transduction	BP	4.14e-06	GO:0010646:regulation of cell communication
component_560	Vascular_endothelial_cells	GO:0051056	regulation of small GTPase mediated signal transduction	BP	4.14e-06	GO:0009966:regulation of signal transduction
component_560	Vascular_endothelial_cells	GO:2000145	regulation of cell motility	BP	1.53e-12	GO:0048870:cell motility
component_564	Lymphoid_cells	GO:0030101	natural killer cell activation	BP	9.54e-07	GO:0046649:lymphocyte activation
component_564	Lymphoid_cells	GO:0050853	B cell receptor signaling pathway	BP	2.56e-12	GO:0002682:regulation of immune system process
component_564	Lymphoid_cells	GO:0050853	B cell receptor signaling pathway	BP	2.56e-12	GO:0002757:immune response-activating signal transduction
component_564	Lymphoid_cells	GO:0050851	antigen receptor-mediated signaling pathway	BP	1.09e-21	GO:0002682:regulation of immune system process
component_564	Lymphoid_cells	GO:0050851	antigen receptor-mediated signaling pathway	BP	1.09e-21	GO:0002757:immune response-activating signal transduction
component_564	Lymphoid_cells	GO:0002757	immune response-activating signal transduction	BP	4.94e-25	GO:0002682:regulation of immune system process
component_564	Lymphoid_cells	GO:0002757	immune response-activating signal transduction	BP	4.94e-25	GO:0002757:immune response-activating signal transduction
component_564	Lymphoid_cells	GO:0002429	immune response-activating cell surface receptor signaling pathway	BP	4.94e-25	GO:0002682:regulation of immune system process
component_564	Lymphoid_cells	GO:0002429	immune response-activating cell surface receptor signaling pathway	BP	4.94e-25	GO:0002757:immune response-activating signal transduction
component_564	Lymphoid_cells	GO:0002768	immune response-regulating cell surface receptor signaling pathway	BP	1.37e-26	GO:0002682:regulation of immune system process
component_564	Lymphoid_cells	GO:0050852	T cell receptor signaling pathway	BP	3.42e-10	GO:0002682:regulation of immune system process
component_564	Lymphoid_cells	GO:0050852	T cell receptor signaling pathway	BP	3.42e-10	GO:0002757:immune response-activating signal transduction
component_564	Lymphoid_cells	GO:0002764	immune response-regulating signaling pathway	BP	5.64e-26	GO:0002682:regulation of immune system process
component_564	Lymphoid_cells	GO:0050864	regulation of B cell activation	BP	1.83e-10	GO:0046649:lymphocyte activation
component_564	Lymphoid_cells	GO:0050864	regulation of B cell activation	BP	1.83e-10	GO:0002682:regulation of immune system process
component_571	PDE11A_FAM19A2_positive_cells,Amacrine_cells,Inhibitory_interneurons	GO:1902255	positive regulation of intrinsic apoptotic signaling pathway by p53 class mediator	BP	5.12e-08	GO:0010646:regulation of cell communication
component_571	PDE11A_FAM19A2_positive_cells,Amacrine_cells,Inhibitory_interneurons	GO:1902255	positive regulation of intrinsic apoptotic signaling pathway by p53 class mediator	BP	5.12e-08	GO:0009966:regulation of signal transduction
component_583	Microglia	GO:0045917	positive regulation of complement activation	BP	1.23e-07	GO:0002682:regulation of immune system process
component_583	Microglia	GO:0032816	positive regulation of natural killer cell activation	BP	2.36e-07	GO:0046649:lymphocyte activation
component_583	Microglia	GO:0032816	positive regulation of natural killer cell activation	BP	2.36e-07	GO:0002682:regulation of immune system process
component_583	Microglia	GO:0032814	regulation of natural killer cell activation	BP	3.81e-06	GO:0046649:lymphocyte activation
component_583	Microglia	GO:0032814	regulation of natural killer cell activation	BP	3.81e-06	GO:0002682:regulation of immune system process
component_583	Microglia	GO:2001279	regulation of unsaturated fatty acid biosynthetic process	BP	4.4e-08	GO:0044255:cellular lipid metabolic process
component_583	Microglia	GO:2001279	regulation of unsaturated fatty acid biosynthetic process	BP	4.4e-08	GO:0009889:regulation of biosynthetic process
component_583	Microglia	GO:0031392	regulation of prostaglandin biosynthetic process	BP	4.4e-08	GO:0044255:cellular lipid metabolic process
component_583	Microglia	GO:0031392	regulation of prostaglandin biosynthetic process	BP	4.4e-08	GO:0009889:regulation of biosynthetic process
component_583	Microglia	GO:0031394	positive regulation of prostaglandin biosynthetic process	BP	4.4e-08	GO:0044255:cellular lipid metabolic process
component_583	Microglia	GO:0031394	positive regulation of prostaglandin biosynthetic process	BP	4.4e-08	GO:0009889:regulation of biosynthetic process
component_583	Microglia	GO:2001280	positive regulation of unsaturated fatty acid biosynthetic process	BP	4.4e-08	GO:0044255:cellular lipid metabolic process
component_583	Microglia	GO:2001280	positive regulation of unsaturated fatty acid biosynthetic process	BP	4.4e-08	GO:0009889:regulation of biosynthetic process
component_583	Microglia	GO:2001171	positive regulation of ATP biosynthetic process	BP	4.25e-06	GO:0009889:regulation of biosynthetic process
component_583	Microglia	GO:2001169	regulation of ATP biosynthetic process	BP	4.25e-06	GO:0009889:regulation of biosynthetic process
component_583	Microglia	GO:0002504	antigen processing and presentation of peptide or polysaccharide antigen via MHC class II	BP	1.32e-13	GO:0019882:antigen processing and presentation
component_583	Microglia	GO:0002495	antigen processing and presentation of peptide antigen via MHC class II	BP	1.32e-13	GO:0019882:antigen processing and presentation
component_583	Microglia	GO:0002478	antigen processing and presentation of exogenous peptide antigen	BP	1.32e-13	GO:0019882:antigen processing and presentation
component_583	Microglia	GO:0019886	antigen processing and presentation of exogenous peptide antigen via MHC class II	BP	1.32e-13	GO:0019882:antigen processing and presentation
component_583	Microglia	GO:0045591	positive regulation of regulatory T cell differentiation	BP	5.63e-06	GO:0046649:lymphocyte activation
component_583	Microglia	GO:0045591	positive regulation of regulatory T cell differentiation	BP	5.63e-06	GO:0002682:regulation of immune system process
component_583	Microglia	GO:0045655	regulation of monocyte differentiation	BP	6.22e-06	GO:0002682:regulation of immune system process
component_583	Microglia	GO:0045657	positive regulation of monocyte differentiation	BP	6.22e-06	GO:0002682:regulation of immune system process
component_583	Microglia	GO:0019884	antigen processing and presentation of exogenous antigen	BP	2.61e-13	GO:0019882:antigen processing and presentation
component_583	Microglia	GO:0002922	positive regulation of humoral immune response	BP	9.56e-06	GO:0002682:regulation of immune system process
component_583	Microglia	GO:0030449	regulation of complement activation	BP	9.63e-06	GO:0002682:regulation of immune system process
component_590	Erythroblasts	GO:2000558	positive regulation of immunoglobulin production in mucosal tissue	BP	1.04e-11	GO:0002682:regulation of immune system process
component_590	Erythroblasts	GO:2000557	regulation of immunoglobulin production in mucosal tissue	BP	1.04e-11	GO:0002682:regulation of immune system process
component_590	Erythroblasts	GO:0021800	cerebral cortex tangential migration	BP	1.64e-11	GO:0048870:cell motility
component_590	Erythroblasts	GO:0046985	positive regulation of hemoglobin biosynthetic process	BP	2.43e-11	GO:0009889:regulation of biosynthetic process
component_590	Erythroblasts	GO:0046984	regulation of hemoglobin biosynthetic process	BP	2.43e-11	GO:0009889:regulation of biosynthetic process
component_590	Erythroblasts	GO:0002714	positive regulation of B cell mediated immunity	BP	3.21e-22	GO:0002682:regulation of immune system process
component_590	Erythroblasts	GO:0002891	positive regulation of immunoglobulin mediated immune response	BP	3.21e-22	GO:0002682:regulation of immune system process
component_590	Erythroblasts	GO:1905618	positive regulation of miRNA-mediated gene silencing by inhibition of translation	BP	1.27e-09	GO:0009889:regulation of biosynthetic process
component_590	Erythroblasts	GO:1900153	positive regulation of nuclear-transcribed mRNA catabolic process, deadenylation-dependent decay	BP	1.27e-09	GO:0009889:regulation of biosynthetic process
component_590	Erythroblasts	GO:1905616	regulation of miRNA-mediated gene silencing by inhibition of translation	BP	1.27e-09	GO:0009889:regulation of biosynthetic process
component_590	Erythroblasts	GO:1900151	regulation of nuclear-transcribed mRNA catabolic process, deadenylation-dependent decay	BP	1.27e-09	GO:0009889:regulation of biosynthetic process
component_590	Erythroblasts	GO:1902635	1-phosphatidyl-1D-myo-inositol 4,5-bisphosphate biosynthetic process	BP	9.59e-11	GO:0044255:cellular lipid metabolic process
component_598	Lymphoid_cells	GO:0002468	dendritic cell antigen processing and presentation	BP	9.22e-07	GO:0019882:antigen processing and presentation
component_598	Lymphoid_cells	GO:0043382	positive regulation of memory T cell differentiation	BP	9.22e-07	GO:0046649:lymphocyte activation
component_598	Lymphoid_cells	GO:0043382	positive regulation of memory T cell differentiation	BP	9.22e-07	GO:0002682:regulation of immune system process
component_598	Lymphoid_cells	GO:0043380	regulation of memory T cell differentiation	BP	9.22e-07	GO:0046649:lymphocyte activation
component_598	Lymphoid_cells	GO:0043380	regulation of memory T cell differentiation	BP	9.22e-07	GO:0002682:regulation of immune system process
component_598	Lymphoid_cells	GO:0002469	myeloid dendritic cell antigen processing and presentation	BP	9.22e-07	GO:0019882:antigen processing and presentation
component_598	Lymphoid_cells	GO:0002491	antigen processing and presentation of endogenous peptide antigen via MHC class II	BP	9.22e-07	GO:0019882:antigen processing and presentation
component_598	Lymphoid_cells	GO:0002774	Fc receptor mediated inhibitory signaling pathway	BP	1.98e-06	GO:0002682:regulation of immune system process
component_598	Lymphoid_cells	GO:0032831	positive regulation of CD4-positive, CD25-positive, alpha-beta regulatory T cell differentiation	BP	1.98e-06	GO:0046649:lymphocyte activation
component_598	Lymphoid_cells	GO:0032831	positive regulation of CD4-positive, CD25-positive, alpha-beta regulatory T cell differentiation	BP	1.98e-06	GO:0002682:regulation of immune system process
component_598	Lymphoid_cells	GO:0032829	regulation of CD4-positive, CD25-positive, alpha-beta regulatory T cell differentiation	BP	1.98e-06	GO:0046649:lymphocyte activation
component_598	Lymphoid_cells	GO:0032829	regulation of CD4-positive, CD25-positive, alpha-beta regulatory T cell differentiation	BP	1.98e-06	GO:0002682:regulation of immune system process
component_598	Lymphoid_cells	GO:0035669	TRAM-dependent toll-like receptor 4 signaling pathway	BP	1.98e-06	GO:0002682:regulation of immune system process
component_598	Lymphoid_cells	GO:0002756	MyD88-independent toll-like receptor signaling pathway	BP	1.98e-06	GO:0002682:regulation of immune system process
component_598	Lymphoid_cells	GO:0035668	TRAM-dependent toll-like receptor signaling pathway	BP	1.98e-06	GO:0002682:regulation of immune system process
component_599	Lymphoid_cells	GO:0042110	T cell activation	BP	2.52e-06	GO:0046649:lymphocyte activation
component_599	Lymphoid_cells	GO:0002768	immune response-regulating cell surface receptor signaling pathway	BP	8.83e-07	GO:0002682:regulation of immune system process
component_599	Lymphoid_cells	GO:0002764	immune response-regulating signaling pathway	BP	2.23e-06	GO:0002682:regulation of immune system process
component_599	Lymphoid_cells	GO:0046649	lymphocyte activation	BP	2.21e-06	GO:0046649:lymphocyte activation
component_604	Neuroendocrine_cells,Islet_endocrine_cells,Chromaffin_cells	GO:0050960	detection of temperature stimulus involved in thermoception	BP	6.44e-07	GO:0051606:detection of stimulus
component_604	Neuroendocrine_cells,Islet_endocrine_cells,Chromaffin_cells	GO:0050960	detection of temperature stimulus involved in thermoception	BP	6.44e-07	GO:0009605:response to external stimulus
component_604	Neuroendocrine_cells,Islet_endocrine_cells,Chromaffin_cells	GO:0120169	detection of cold stimulus involved in thermoception	BP	6.44e-07	GO:0051606:detection of stimulus
component_604	Neuroendocrine_cells,Islet_endocrine_cells,Chromaffin_cells	GO:0120169	detection of cold stimulus involved in thermoception	BP	6.44e-07	GO:0009605:response to external stimulus
component_604	Neuroendocrine_cells,Islet_endocrine_cells,Chromaffin_cells	GO:1900738	positive regulation of phospholipase C-activating G protein-coupled receptor signaling pathway	BP	5.15e-10	GO:0010646:regulation of cell communication
component_604	Neuroendocrine_cells,Islet_endocrine_cells,Chromaffin_cells	GO:1900738	positive regulation of phospholipase C-activating G protein-coupled receptor signaling pathway	BP	5.15e-10	GO:0009966:regulation of signal transduction
component_604	Neuroendocrine_cells,Islet_endocrine_cells,Chromaffin_cells	GO:1900736	regulation of phospholipase C-activating G protein-coupled receptor signaling pathway	BP	5.15e-10	GO:0010646:regulation of cell communication
component_604	Neuroendocrine_cells,Islet_endocrine_cells,Chromaffin_cells	GO:1900736	regulation of phospholipase C-activating G protein-coupled receptor signaling pathway	BP	5.15e-10	GO:0009966:regulation of signal transduction
component_604	Neuroendocrine_cells,Islet_endocrine_cells,Chromaffin_cells	GO:0060452	positive regulation of cardiac muscle contraction	BP	7.97e-07	GO:0006937:regulation of muscle contraction
component_604	Neuroendocrine_cells,Islet_endocrine_cells,Chromaffin_cells	GO:0045989	positive regulation of striated muscle contraction	BP	7.97e-07	GO:0006937:regulation of muscle contraction
component_611	Myeloid_cells	GO:0071725	response to triacyl bacterial lipopeptide	BP	3.68e-09	GO:0009605:response to external stimulus
component_611	Myeloid_cells	GO:0071727	cellular response to triacyl bacterial lipopeptide	BP	3.68e-09	GO:0009605:response to external stimulus
component_611	Myeloid_cells	GO:0002468	dendritic cell antigen processing and presentation	BP	6.17e-09	GO:0019882:antigen processing and presentation
component_611	Myeloid_cells	GO:0043382	positive regulation of memory T cell differentiation	BP	6.17e-09	GO:0046649:lymphocyte activation
component_611	Myeloid_cells	GO:0043382	positive regulation of memory T cell differentiation	BP	6.17e-09	GO:0002682:regulation of immune system process
component_611	Myeloid_cells	GO:0043380	regulation of memory T cell differentiation	BP	6.17e-09	GO:0046649:lymphocyte activation
component_611	Myeloid_cells	GO:0043380	regulation of memory T cell differentiation	BP	6.17e-09	GO:0002682:regulation of immune system process
component_611	Myeloid_cells	GO:0002469	myeloid dendritic cell antigen processing and presentation	BP	6.17e-09	GO:0019882:antigen processing and presentation
component_611	Myeloid_cells	GO:0002491	antigen processing and presentation of endogenous peptide antigen via MHC class II	BP	6.17e-09	GO:0019882:antigen processing and presentation
component_611	Myeloid_cells	GO:2000866	positive regulation of estradiol secretion	BP	6.89e-09	GO:0010646:regulation of cell communication
component_611	Myeloid_cells	GO:2000864	regulation of estradiol secretion	BP	6.89e-09	GO:0010646:regulation of cell communication
component_611	Myeloid_cells	GO:0071724	response to diacyl bacterial lipopeptide	BP	4.08e-17	GO:0009605:response to external stimulus
component_611	Myeloid_cells	GO:0071726	cellular response to diacyl bacterial lipopeptide	BP	4.08e-17	GO:0009605:response to external stimulus
component_611	Myeloid_cells	GO:0009104	lipopolysaccharide catabolic process	BP	1.01e-08	GO:0044255:cellular lipid metabolic process
component_611	Myeloid_cells	GO:0008653	lipopolysaccharide metabolic process	BP	1.01e-08	GO:0044255:cellular lipid metabolic process
component_611	Myeloid_cells	GO:0034138	toll-like receptor 3 signaling pathway	BP	1.34e-08	GO:0002682:regulation of immune system process
component_611	Myeloid_cells	GO:0045650	negative regulation of macrophage differentiation	BP	1.38e-08	GO:0002682:regulation of immune system process
component_611	Myeloid_cells	GO:0030853	negative regulation of granulocyte differentiation	BP	1.38e-08	GO:0002682:regulation of immune system process
component_611	Myeloid_cells	GO:0060766	negative regulation of androgen receptor signaling pathway	BP	1.58e-08	GO:0010646:regulation of cell communication
component_611	Myeloid_cells	GO:0060766	negative regulation of androgen receptor signaling pathway	BP	1.58e-08	GO:0009966:regulation of signal transduction
component_611	Myeloid_cells	GO:0032831	positive regulation of CD4-positive, CD25-positive, alpha-beta regulatory T cell differentiation	BP	1.59e-08	GO:0046649:lymphocyte activation
component_611	Myeloid_cells	GO:0032831	positive regulation of CD4-positive, CD25-positive, alpha-beta regulatory T cell differentiation	BP	1.59e-08	GO:0002682:regulation of immune system process
component_611	Myeloid_cells	GO:0032829	regulation of CD4-positive, CD25-positive, alpha-beta regulatory T cell differentiation	BP	1.59e-08	GO:0046649:lymphocyte activation
component_611	Myeloid_cells	GO:0032829	regulation of CD4-positive, CD25-positive, alpha-beta regulatory T cell differentiation	BP	1.59e-08	GO:0002682:regulation of immune system process
component_611	Myeloid_cells	GO:1904694	negative regulation of vascular associated smooth muscle contraction	BP	1.71e-08	GO:0006937:regulation of muscle contraction
component_611	Myeloid_cells	GO:0060025	regulation of synaptic activity	BP	1.71e-08	GO:0010646:regulation of cell communication
component_611	Myeloid_cells	GO:0060025	regulation of synaptic activity	BP	1.71e-08	GO:0007267:cell-cell signaling
component_611	Myeloid_cells	GO:0002634	regulation of germinal center formation	BP	1.71e-08	GO:0002682:regulation of immune system process
component_611	Myeloid_cells	GO:0048023	positive regulation of melanin biosynthetic process	BP	1.71e-08	GO:0009889:regulation of biosynthetic process
component_611	Myeloid_cells	GO:0048021	regulation of melanin biosynthetic process	BP	1.71e-08	GO:0009889:regulation of biosynthetic process
component_619	Myeloid_cells	GO:0042102	positive regulation of T cell proliferation	BP	2.3e-06	GO:0046649:lymphocyte activation
component_619	Myeloid_cells	GO:0042102	positive regulation of T cell proliferation	BP	2.3e-06	GO:0002682:regulation of immune system process
component_619	Myeloid_cells	GO:0050671	positive regulation of lymphocyte proliferation	BP	1.76e-08	GO:0046649:lymphocyte activation
component_619	Myeloid_cells	GO:0050671	positive regulation of lymphocyte proliferation	BP	1.76e-08	GO:0002682:regulation of immune system process
component_619	Myeloid_cells	GO:0042129	regulation of T cell proliferation	BP	1.74e-06	GO:0046649:lymphocyte activation
component_619	Myeloid_cells	GO:0042129	regulation of T cell proliferation	BP	1.74e-06	GO:0002682:regulation of immune system process
component_619	Myeloid_cells	GO:0050670	regulation of lymphocyte proliferation	BP	4.01e-09	GO:0046649:lymphocyte activation
component_619	Myeloid_cells	GO:0050670	regulation of lymphocyte proliferation	BP	4.01e-09	GO:0002682:regulation of immune system process
component_619	Myeloid_cells	GO:0050870	positive regulation of T cell activation	BP	3.09e-07	GO:0046649:lymphocyte activation
component_619	Myeloid_cells	GO:0050870	positive regulation of T cell activation	BP	3.09e-07	GO:0002682:regulation of immune system process
component_619	Myeloid_cells	GO:0051251	positive regulation of lymphocyte activation	BP	6.28e-09	GO:0046649:lymphocyte activation
component_619	Myeloid_cells	GO:0051251	positive regulation of lymphocyte activation	BP	6.28e-09	GO:0002682:regulation of immune system process
component_634	Vascular_endothelial_cells	GO:0043516	regulation of DNA damage response, signal transduction by p53 class mediator	BP	2.52e-08	GO:0006974:cellular response to DNA damage stimulus
component_634	Vascular_endothelial_cells	GO:0043516	regulation of DNA damage response, signal transduction by p53 class mediator	BP	2.52e-08	GO:0010646:regulation of cell communication
component_634	Vascular_endothelial_cells	GO:0043516	regulation of DNA damage response, signal transduction by p53 class mediator	BP	2.52e-08	GO:0009966:regulation of signal transduction
component_634	Vascular_endothelial_cells	GO:1902253	regulation of intrinsic apoptotic signaling pathway by p53 class mediator	BP	2.04e-07	GO:0010646:regulation of cell communication
component_634	Vascular_endothelial_cells	GO:1902253	regulation of intrinsic apoptotic signaling pathway by p53 class mediator	BP	2.04e-07	GO:0009966:regulation of signal transduction
component_634	Vascular_endothelial_cells	GO:1901796	regulation of signal transduction by p53 class mediator	BP	1.13e-09	GO:0010646:regulation of cell communication
component_634	Vascular_endothelial_cells	GO:1901796	regulation of signal transduction by p53 class mediator	BP	1.13e-09	GO:0009966:regulation of signal transduction
component_640	Limbic_system_neurons,Inhibitory_neurons,SLC24A4_PEX5L_positive_cells	GO:1902255	positive regulation of intrinsic apoptotic signaling pathway by p53 class mediator	BP	9.53e-06	GO:0010646:regulation of cell communication
component_640	Limbic_system_neurons,Inhibitory_neurons,SLC24A4_PEX5L_positive_cells	GO:1902255	positive regulation of intrinsic apoptotic signaling pathway by p53 class mediator	BP	9.53e-06	GO:0009966:regulation of signal transduction
component_642	Chromaffin_cells,Sympathoblasts	GO:0045986	negative regulation of smooth muscle contraction	BP	2.94e-06	GO:0006937:regulation of muscle contraction
component_642	Chromaffin_cells,Sympathoblasts	GO:0045932	negative regulation of muscle contraction	BP	2.94e-06	GO:0006937:regulation of muscle contraction
component_642	Chromaffin_cells,Sympathoblasts	GO:0010881	regulation of cardiac muscle contraction by regulation of the release of sequestered calcium ion	BP	7.44e-11	GO:0006816:calcium ion transport
component_642	Chromaffin_cells,Sympathoblasts	GO:0010881	regulation of cardiac muscle contraction by regulation of the release of sequestered calcium ion	BP	7.44e-11	GO:0006937:regulation of muscle contraction
component_642	Chromaffin_cells,Sympathoblasts	GO:0010881	regulation of cardiac muscle contraction by regulation of the release of sequestered calcium ion	BP	7.44e-11	GO:0034765:regulation of ion transmembrane transport
component_642	Chromaffin_cells,Sympathoblasts	GO:0010881	regulation of cardiac muscle contraction by regulation of the release of sequestered calcium ion	BP	7.44e-11	GO:0043269:regulation of ion transport
component_642	Chromaffin_cells,Sympathoblasts	GO:0010880	regulation of release of sequestered calcium ion into cytosol by sarcoplasmic reticulum	BP	7.44e-11	GO:0006816:calcium ion transport
component_642	Chromaffin_cells,Sympathoblasts	GO:0010880	regulation of release of sequestered calcium ion into cytosol by sarcoplasmic reticulum	BP	7.44e-11	GO:0034765:regulation of ion transmembrane transport
component_642	Chromaffin_cells,Sympathoblasts	GO:0010880	regulation of release of sequestered calcium ion into cytosol by sarcoplasmic reticulum	BP	7.44e-11	GO:0043269:regulation of ion transport
component_644	Erythroblasts,Megakaryocytes	GO:0043507	positive regulation of JUN kinase activity	BP	2.78e-11	GO:0010646:regulation of cell communication
component_644	Erythroblasts,Megakaryocytes	GO:0043507	positive regulation of JUN kinase activity	BP	2.78e-11	GO:0009966:regulation of signal transduction
component_659	Mesothelial_cells,Epicardial_fat_cells	GO:0070426	positive regulation of nucleotide-binding oligomerization domain containing signaling pathway	BP	1.07e-06	GO:0002682:regulation of immune system process
component_659	Mesothelial_cells,Epicardial_fat_cells	GO:0070426	positive regulation of nucleotide-binding oligomerization domain containing signaling pathway	BP	1.07e-06	GO:0010646:regulation of cell communication
component_659	Mesothelial_cells,Epicardial_fat_cells	GO:0070426	positive regulation of nucleotide-binding oligomerization domain containing signaling pathway	BP	1.07e-06	GO:0009966:regulation of signal transduction
component_659	Mesothelial_cells,Epicardial_fat_cells	GO:0070434	positive regulation of nucleotide-binding oligomerization domain containing 2 signaling pathway	BP	1.07e-06	GO:0002682:regulation of immune system process
component_659	Mesothelial_cells,Epicardial_fat_cells	GO:0070434	positive regulation of nucleotide-binding oligomerization domain containing 2 signaling pathway	BP	1.07e-06	GO:0010646:regulation of cell communication
component_659	Mesothelial_cells,Epicardial_fat_cells	GO:0070434	positive regulation of nucleotide-binding oligomerization domain containing 2 signaling pathway	BP	1.07e-06	GO:0009966:regulation of signal transduction
component_659	Mesothelial_cells,Epicardial_fat_cells	GO:1903265	positive regulation of tumor necrosis factor-mediated signaling pathway	BP	1.07e-06	GO:0010646:regulation of cell communication
component_659	Mesothelial_cells,Epicardial_fat_cells	GO:1903265	positive regulation of tumor necrosis factor-mediated signaling pathway	BP	1.07e-06	GO:0009966:regulation of signal transduction
component_659	Mesothelial_cells,Epicardial_fat_cells	GO:0070432	regulation of nucleotide-binding oligomerization domain containing 2 signaling pathway	BP	1.07e-06	GO:0002682:regulation of immune system process
component_659	Mesothelial_cells,Epicardial_fat_cells	GO:0070432	regulation of nucleotide-binding oligomerization domain containing 2 signaling pathway	BP	1.07e-06	GO:0010646:regulation of cell communication
component_659	Mesothelial_cells,Epicardial_fat_cells	GO:0070432	regulation of nucleotide-binding oligomerization domain containing 2 signaling pathway	BP	1.07e-06	GO:0009966:regulation of signal transduction
component_659	Mesothelial_cells,Epicardial_fat_cells	GO:0070424	regulation of nucleotide-binding oligomerization domain containing signaling pathway	BP	1.07e-06	GO:0002682:regulation of immune system process
component_659	Mesothelial_cells,Epicardial_fat_cells	GO:0070424	regulation of nucleotide-binding oligomerization domain containing signaling pathway	BP	1.07e-06	GO:0010646:regulation of cell communication
component_659	Mesothelial_cells,Epicardial_fat_cells	GO:0070424	regulation of nucleotide-binding oligomerization domain containing signaling pathway	BP	1.07e-06	GO:0009966:regulation of signal transduction
component_659	Mesothelial_cells,Epicardial_fat_cells	GO:1902255	positive regulation of intrinsic apoptotic signaling pathway by p53 class mediator	BP	4.22e-06	GO:0010646:regulation of cell communication
component_659	Mesothelial_cells,Epicardial_fat_cells	GO:1902255	positive regulation of intrinsic apoptotic signaling pathway by p53 class mediator	BP	4.22e-06	GO:0009966:regulation of signal transduction
component_673	Schwann_cells,ENS_glia	GO:0099545	trans-synaptic signaling by trans-synaptic complex	BP	1.38e-08	GO:0007267:cell-cell signaling
component_673	Schwann_cells,ENS_glia	GO:1902232	regulation of positive thymic T cell selection	BP	1.38e-08	GO:0046649:lymphocyte activation
component_673	Schwann_cells,ENS_glia	GO:1902232	regulation of positive thymic T cell selection	BP	1.38e-08	GO:0002682:regulation of immune system process
component_673	Schwann_cells,ENS_glia	GO:0061002	negative regulation of dendritic spine morphogenesis	BP	1.41e-08	GO:0060996:dendritic spine development
component_673	Schwann_cells,ENS_glia	GO:0032230	positive regulation of synaptic transmission, GABAergic	BP	1.41e-08	GO:0010646:regulation of cell communication
component_673	Schwann_cells,ENS_glia	GO:0032230	positive regulation of synaptic transmission, GABAergic	BP	1.41e-08	GO:0007267:cell-cell signaling
component_673	Schwann_cells,ENS_glia	GO:0061000	negative regulation of dendritic spine development	BP	1.41e-08	GO:0060996:dendritic spine development
component_687	Thymocytes	GO:0050851	antigen receptor-mediated signaling pathway	BP	1.28e-08	GO:0002682:regulation of immune system process
component_687	Thymocytes	GO:0050851	antigen receptor-mediated signaling pathway	BP	1.28e-08	GO:0002757:immune response-activating signal transduction
component_687	Thymocytes	GO:0002757	immune response-activating signal transduction	BP	3.58e-10	GO:0002682:regulation of immune system process
component_687	Thymocytes	GO:0002757	immune response-activating signal transduction	BP	3.58e-10	GO:0002757:immune response-activating signal transduction
component_687	Thymocytes	GO:0002429	immune response-activating cell surface receptor signaling pathway	BP	3.58e-10	GO:0002682:regulation of immune system process
component_687	Thymocytes	GO:0002429	immune response-activating cell surface receptor signaling pathway	BP	3.58e-10	GO:0002757:immune response-activating signal transduction
component_687	Thymocytes	GO:0002768	immune response-regulating cell surface receptor signaling pathway	BP	2.16e-10	GO:0002682:regulation of immune system process
component_701	Stromal_cells,Stellate_cells	GO:0046643	regulation of gamma-delta T cell activation	BP	6.35e-08	GO:0046649:lymphocyte activation
component_701	Stromal_cells,Stellate_cells	GO:0046643	regulation of gamma-delta T cell activation	BP	6.35e-08	GO:0002682:regulation of immune system process
component_709	Lymphoid_cells	GO:0046643	regulation of gamma-delta T cell activation	BP	6.66e-06	GO:0046649:lymphocyte activation
component_709	Lymphoid_cells	GO:0046643	regulation of gamma-delta T cell activation	BP	6.66e-06	GO:0002682:regulation of immune system process
component_709	Lymphoid_cells	GO:0045588	positive regulation of gamma-delta T cell differentiation	BP	6.66e-06	GO:0046649:lymphocyte activation
component_709	Lymphoid_cells	GO:0045588	positive regulation of gamma-delta T cell differentiation	BP	6.66e-06	GO:0002682:regulation of immune system process
component_709	Lymphoid_cells	GO:0045586	regulation of gamma-delta T cell differentiation	BP	6.66e-06	GO:0046649:lymphocyte activation
component_709	Lymphoid_cells	GO:0045586	regulation of gamma-delta T cell differentiation	BP	6.66e-06	GO:0002682:regulation of immune system process
component_709	Lymphoid_cells	GO:0046645	positive regulation of gamma-delta T cell activation	BP	6.66e-06	GO:0046649:lymphocyte activation
component_709	Lymphoid_cells	GO:0046645	positive regulation of gamma-delta T cell activation	BP	6.66e-06	GO:0002682:regulation of immune system process
component_709	Lymphoid_cells	GO:0060907	positive regulation of macrophage cytokine production	BP	4.06e-07	GO:0002682:regulation of immune system process
component_722	Lymphoid_cells	GO:0030101	natural killer cell activation	BP	2.27e-06	GO:0046649:lymphocyte activation
component_722	Lymphoid_cells	GO:0050853	B cell receptor signaling pathway	BP	6.46e-13	GO:0002682:regulation of immune system process
component_722	Lymphoid_cells	GO:0050853	B cell receptor signaling pathway	BP	6.46e-13	GO:0002757:immune response-activating signal transduction
component_722	Lymphoid_cells	GO:0006958	complement activation, classical pathway	BP	6.61e-06	GO:0002682:regulation of immune system process
component_722	Lymphoid_cells	GO:0050851	antigen receptor-mediated signaling pathway	BP	7.71e-21	GO:0002682:regulation of immune system process
component_722	Lymphoid_cells	GO:0050851	antigen receptor-mediated signaling pathway	BP	7.71e-21	GO:0002757:immune response-activating signal transduction
component_722	Lymphoid_cells	GO:0002757	immune response-activating signal transduction	BP	1.3e-23	GO:0002682:regulation of immune system process
component_722	Lymphoid_cells	GO:0002757	immune response-activating signal transduction	BP	1.3e-23	GO:0002757:immune response-activating signal transduction
component_730	Myeloid_cells	GO:1901660	calcium ion export	BP	1.75e-09	GO:0006816:calcium ion transport
component_730	Myeloid_cells	GO:1990034	calcium ion export across plasma membrane	BP	1.75e-09	GO:0006816:calcium ion transport
component_730	Myeloid_cells	GO:0050911	detection of chemical stimulus involved in sensory perception of smell	BP	1.75e-09	GO:0051606:detection of stimulus
component_737	Myeloid_cells	GO:0050863	regulation of T cell activation	BP	3.06e-06	GO:0046649:lymphocyte activation
component_737	Myeloid_cells	GO:0050863	regulation of T cell activation	BP	3.06e-06	GO:0002682:regulation of immune system process
component_737	Myeloid_cells	GO:0051251	positive regulation of lymphocyte activation	BP	5.12e-06	GO:0046649:lymphocyte activation
component_737	Myeloid_cells	GO:0051251	positive regulation of lymphocyte activation	BP	5.12e-06	GO:0002682:regulation of immune system process
component_737	Myeloid_cells	GO:0051249	regulation of lymphocyte activation	BP	1.18e-07	GO:0046649:lymphocyte activation
component_737	Myeloid_cells	GO:0051249	regulation of lymphocyte activation	BP	1.18e-07	GO:0002682:regulation of immune system process
component_745	Stromal_cells	GO:1901993	regulation of meiotic cell cycle phase transition	BP	8.3e-10	GO:0051726:regulation of cell cycle
component_745	Stromal_cells	GO:1902103	negative regulation of metaphase/anaphase transition of meiotic cell cycle	BP	8.3e-10	GO:0051726:regulation of cell cycle
component_745	Stromal_cells	GO:0051447	negative regulation of meiotic cell cycle	BP	8.3e-10	GO:0051726:regulation of cell cycle
component_745	Stromal_cells	GO:1902102	regulation of metaphase/anaphase transition of meiotic cell cycle	BP	8.3e-10	GO:0051726:regulation of cell cycle
component_745	Stromal_cells	GO:0033316	meiotic spindle assembly checkpoint signaling	BP	8.3e-10	GO:0051726:regulation of cell cycle
component_745	Stromal_cells	GO:1901994	negative regulation of meiotic cell cycle phase transition	BP	8.3e-10	GO:0051726:regulation of cell cycle
component_745	Stromal_cells	GO:0044779	meiotic spindle checkpoint signaling	BP	8.3e-10	GO:0051726:regulation of cell cycle
component_745	Stromal_cells	GO:1905132	regulation of meiotic chromosome separation	BP	8.3e-10	GO:0051726:regulation of cell cycle
component_745	Stromal_cells	GO:1905133	negative regulation of meiotic chromosome separation	BP	8.3e-10	GO:0051726:regulation of cell cycle
component_745	Stromal_cells	GO:0033313	meiotic cell cycle checkpoint signaling	BP	8.3e-10	GO:0051726:regulation of cell cycle
component_745	Stromal_cells	GO:0031536	positive regulation of exit from mitosis	BP	8.3e-10	GO:0051726:regulation of cell cycle
component_745	Stromal_cells	GO:0006301	postreplication repair	BP	1.24e-09	GO:0006974:cellular response to DNA damage stimulus
component_745	Stromal_cells	GO:0019985	translesion synthesis	BP	1.24e-09	GO:0006974:cellular response to DNA damage stimulus
component_745	Stromal_cells	GO:0007095	mitotic G2 DNA damage checkpoint signaling	BP	1.24e-09	GO:0006974:cellular response to DNA damage stimulus
component_745	Stromal_cells	GO:0007095	mitotic G2 DNA damage checkpoint signaling	BP	1.24e-09	GO:0051726:regulation of cell cycle
component_745	Stromal_cells	GO:0070495	negative regulation of thrombin-activated receptor signaling pathway	BP	2.12e-09	GO:0010646:regulation of cell communication
component_745	Stromal_cells	GO:0070495	negative regulation of thrombin-activated receptor signaling pathway	BP	2.12e-09	GO:0009966:regulation of signal transduction
component_745	Stromal_cells	GO:0070494	regulation of thrombin-activated receptor signaling pathway	BP	2.12e-09	GO:0010646:regulation of cell communication
component_745	Stromal_cells	GO:0070494	regulation of thrombin-activated receptor signaling pathway	BP	2.12e-09	GO:0009966:regulation of signal transduction
component_745	Stromal_cells	GO:1902425	positive regulation of attachment of mitotic spindle microtubules to kinetochore	BP	7.23e-08	GO:0051726:regulation of cell cycle
component_750	Smooth_muscle_cells	GO:1901896	positive regulation of ATPase-coupled calcium transmembrane transporter activity	BP	1.21e-06	GO:0006816:calcium ion transport
component_750	Smooth_muscle_cells	GO:1901896	positive regulation of ATPase-coupled calcium transmembrane transporter activity	BP	1.21e-06	GO:0034765:regulation of ion transmembrane transport
component_750	Smooth_muscle_cells	GO:1901896	positive regulation of ATPase-coupled calcium transmembrane transporter activity	BP	1.21e-06	GO:0043269:regulation of ion transport
component_752	Hematopoietic_stem_cells	GO:0002757	immune response-activating signal transduction	BP	9.05e-07	GO:0002682:regulation of immune system process
component_752	Hematopoietic_stem_cells	GO:0002757	immune response-activating signal transduction	BP	9.05e-07	GO:0002757:immune response-activating signal transduction
component_752	Hematopoietic_stem_cells	GO:0002429	immune response-activating cell surface receptor signaling pathway	BP	9.05e-07	GO:0002682:regulation of immune system process
component_752	Hematopoietic_stem_cells	GO:0002429	immune response-activating cell surface receptor signaling pathway	BP	9.05e-07	GO:0002757:immune response-activating signal transduction
component_752	Hematopoietic_stem_cells	GO:0002768	immune response-regulating cell surface receptor signaling pathway	BP	4.08e-07	GO:0002682:regulation of immune system process
component_757	Antigen_presenting_cells	GO:0051249	regulation of lymphocyte activation	BP	9.71e-07	GO:0046649:lymphocyte activation
component_757	Antigen_presenting_cells	GO:0051249	regulation of lymphocyte activation	BP	9.71e-07	GO:0002682:regulation of immune system process
component_757	Antigen_presenting_cells	GO:0002694	regulation of leukocyte activation	BP	6.09e-06	GO:0002682:regulation of immune system process
component_765	Mesothelial_cells,Epicardial_fat_cells	GO:0050812	regulation of acyl-CoA biosynthetic process	BP	1.58e-16	GO:0044255:cellular lipid metabolic process
component_765	Mesothelial_cells,Epicardial_fat_cells	GO:0050812	regulation of acyl-CoA biosynthetic process	BP	1.58e-16	GO:0009889:regulation of biosynthetic process
component_765	Mesothelial_cells,Epicardial_fat_cells	GO:0010510	regulation of acetyl-CoA biosynthetic process from pyruvate	BP	1.58e-16	GO:0044255:cellular lipid metabolic process
component_765	Mesothelial_cells,Epicardial_fat_cells	GO:0010510	regulation of acetyl-CoA biosynthetic process from pyruvate	BP	1.58e-16	GO:0009889:regulation of biosynthetic process
component_765	Mesothelial_cells,Epicardial_fat_cells	GO:0032763	regulation of mast cell cytokine production	BP	2.12e-07	GO:0002682:regulation of immune system process
component_771	Erythroblasts	GO:0032968	positive regulation of transcription elongation from RNA polymerase II promoter	BP	3e-08	GO:0009889:regulation of biosynthetic process
component_773	Astrocytes	GO:0036297	interstrand cross-link repair	BP	4.78e-08	GO:0006974:cellular response to DNA damage stimulus
component_773	Astrocytes	GO:0046601	positive regulation of centriole replication	BP	4.81e-08	GO:0051726:regulation of cell cycle
component_773	Astrocytes	GO:0051445	regulation of meiotic cell cycle	BP	8.88e-08	GO:0051726:regulation of cell cycle
component_773	Astrocytes	GO:1902750	negative regulation of cell cycle G2/M phase transition	BP	4.49e-07	GO:0051726:regulation of cell cycle
component_773	Astrocytes	GO:0010972	negative regulation of G2/M transition of mitotic cell cycle	BP	4.49e-07	GO:0051726:regulation of cell cycle
component_773	Astrocytes	GO:0006303	double-strand break repair via nonhomologous end joining	BP	6.64e-07	GO:0006974:cellular response to DNA damage stimulus
component_773	Astrocytes	GO:0000724	double-strand break repair via homologous recombination	BP	3.9e-10	GO:0006974:cellular response to DNA damage stimulus
component_773	Astrocytes	GO:0000725	recombinational repair	BP	3.9e-10	GO:0006974:cellular response to DNA damage stimulus
component_775	Vascular_endothelial_cells	GO:0043516	regulation of DNA damage response, signal transduction by p53 class mediator	BP	1.23e-07	GO:0006974:cellular response to DNA damage stimulus
component_775	Vascular_endothelial_cells	GO:0043516	regulation of DNA damage response, signal transduction by p53 class mediator	BP	1.23e-07	GO:0010646:regulation of cell communication
component_775	Vascular_endothelial_cells	GO:0043516	regulation of DNA damage response, signal transduction by p53 class mediator	BP	1.23e-07	GO:0009966:regulation of signal transduction
component_775	Vascular_endothelial_cells	GO:1902253	regulation of intrinsic apoptotic signaling pathway by p53 class mediator	BP	7.17e-07	GO:0010646:regulation of cell communication
component_775	Vascular_endothelial_cells	GO:1902253	regulation of intrinsic apoptotic signaling pathway by p53 class mediator	BP	7.17e-07	GO:0009966:regulation of signal transduction
component_786	ENS_glia,Schwann_cells	GO:1901185	negative regulation of ERBB signaling pathway	BP	2.23e-08	GO:0010646:regulation of cell communication
component_786	ENS_glia,Schwann_cells	GO:1901185	negative regulation of ERBB signaling pathway	BP	2.23e-08	GO:0009966:regulation of signal transduction
component_786	ENS_glia,Schwann_cells	GO:0042059	negative regulation of epidermal growth factor receptor signaling pathway	BP	2.23e-08	GO:0010646:regulation of cell communication
component_786	ENS_glia,Schwann_cells	GO:0042059	negative regulation of epidermal growth factor receptor signaling pathway	BP	2.23e-08	GO:0009966:regulation of signal transduction
component_789	Myeloid_cells	GO:0032819	positive regulation of natural killer cell proliferation	BP	2.92e-08	GO:0046649:lymphocyte activation
component_789	Myeloid_cells	GO:0032819	positive regulation of natural killer cell proliferation	BP	2.92e-08	GO:0002682:regulation of immune system process
component_789	Myeloid_cells	GO:0062234	platelet activating factor catabolic process	BP	3.08e-08	GO:0044255:cellular lipid metabolic process
component_794	Lymphatic_endothelial_cells	GO:0001814	negative regulation of antibody-dependent cellular cytotoxicity	BP	3.38e-10	GO:0002682:regulation of immune system process
component_794	Lymphatic_endothelial_cells	GO:0001814	negative regulation of antibody-dependent cellular cytotoxicity	BP	3.38e-10	GO:0009605:response to external stimulus
component_794	Lymphatic_endothelial_cells	GO:0043318	negative regulation of cytotoxic T cell degranulation	BP	3.38e-10	GO:0046649:lymphocyte activation
component_794	Lymphatic_endothelial_cells	GO:0043318	negative regulation of cytotoxic T cell degranulation	BP	3.38e-10	GO:0002682:regulation of immune system process
component_794	Lymphatic_endothelial_cells	GO:0001813	regulation of antibody-dependent cellular cytotoxicity	BP	3.38e-10	GO:0002682:regulation of immune system process
component_794	Lymphatic_endothelial_cells	GO:0001813	regulation of antibody-dependent cellular cytotoxicity	BP	3.38e-10	GO:0009605:response to external stimulus
component_794	Lymphatic_endothelial_cells	GO:0001796	regulation of type IIa hypersensitivity	BP	3.38e-10	GO:0002682:regulation of immune system process
component_794	Lymphatic_endothelial_cells	GO:0001796	regulation of type IIa hypersensitivity	BP	3.38e-10	GO:0009605:response to external stimulus
component_794	Lymphatic_endothelial_cells	GO:0002892	regulation of type II hypersensitivity	BP	3.38e-10	GO:0002682:regulation of immune system process
component_794	Lymphatic_endothelial_cells	GO:0002892	regulation of type II hypersensitivity	BP	3.38e-10	GO:0009605:response to external stimulus
component_806	Lymphoid_cells	GO:1903690	negative regulation of wound healing, spreading of epidermal cells	BP	1.19e-07	GO:0048870:cell motility
component_806	Lymphoid_cells	GO:1903690	negative regulation of wound healing, spreading of epidermal cells	BP	1.19e-07	GO:0009605:response to external stimulus
component_806	Lymphoid_cells	GO:1903689	regulation of wound healing, spreading of epidermal cells	BP	1.19e-07	GO:0048870:cell motility
component_806	Lymphoid_cells	GO:0090051	negative regulation of cell migration involved in sprouting angiogenesis	BP	3.31e-06	GO:0048870:cell motility
component_806	Lymphoid_cells	GO:0035582	sequestering of BMP in extracellular matrix	BP	1.33e-07	GO:0010646:regulation of cell communication
component_806	Lymphoid_cells	GO:0035582	sequestering of BMP in extracellular matrix	BP	1.33e-07	GO:0009966:regulation of signal transduction
component_810	Lymphoid_cells	GO:0070495	negative regulation of thrombin-activated receptor signaling pathway	BP	3.42e-08	GO:0010646:regulation of cell communication
component_810	Lymphoid_cells	GO:0070495	negative regulation of thrombin-activated receptor signaling pathway	BP	3.42e-08	GO:0009966:regulation of signal transduction
component_810	Lymphoid_cells	GO:0070494	regulation of thrombin-activated receptor signaling pathway	BP	3.42e-08	GO:0010646:regulation of cell communication
component_810	Lymphoid_cells	GO:0070494	regulation of thrombin-activated receptor signaling pathway	BP	3.42e-08	GO:0009966:regulation of signal transduction
component_810	Lymphoid_cells	GO:1905661	regulation of telomerase RNA reverse transcriptase activity	BP	3.45e-08	GO:0009889:regulation of biosynthetic process
component_810	Lymphoid_cells	GO:1905663	positive regulation of telomerase RNA reverse transcriptase activity	BP	3.45e-08	GO:0009889:regulation of biosynthetic process
component_810	Lymphoid_cells	GO:1902425	positive regulation of attachment of mitotic spindle microtubules to kinetochore	BP	1.6e-06	GO:0051726:regulation of cell cycle
component_810	Lymphoid_cells	GO:1902423	regulation of attachment of mitotic spindle microtubules to kinetochore	BP	1.6e-06	GO:0051726:regulation of cell cycle
component_810	Lymphoid_cells	GO:0044878	mitotic cytokinesis checkpoint signaling	BP	1.6e-06	GO:0051726:regulation of cell cycle
component_810	Lymphoid_cells	GO:0032466	negative regulation of cytokinesis	BP	1.6e-06	GO:0051726:regulation of cell cycle
component_810	Lymphoid_cells	GO:0090235	regulation of metaphase plate congression	BP	1.6e-06	GO:0051726:regulation of cell cycle
component_810	Lymphoid_cells	GO:1905115	regulation of lateral attachment of mitotic spindle microtubules to kinetochore	BP	1.6e-06	GO:0051726:regulation of cell cycle
component_815	Stromal_cells,Stellate_cells	GO:0036297	interstrand cross-link repair	BP	1.24e-08	GO:0006974:cellular response to DNA damage stimulus
component_815	Stromal_cells,Stellate_cells	GO:0046601	positive regulation of centriole replication	BP	1.25e-08	GO:0051726:regulation of cell cycle
component_815	Stromal_cells,Stellate_cells	GO:0051445	regulation of meiotic cell cycle	BP	2.41e-08	GO:0051726:regulation of cell cycle
component_815	Stromal_cells,Stellate_cells	GO:1902750	negative regulation of cell cycle G2/M phase transition	BP	1.2e-07	GO:0051726:regulation of cell cycle
component_815	Stromal_cells,Stellate_cells	GO:0010972	negative regulation of G2/M transition of mitotic cell cycle	BP	1.2e-07	GO:0051726:regulation of cell cycle
component_815	Stromal_cells,Stellate_cells	GO:0000724	double-strand break repair via homologous recombination	BP	4.36e-11	GO:0006974:cellular response to DNA damage stimulus
component_815	Stromal_cells,Stellate_cells	GO:0000725	recombinational repair	BP	4.36e-11	GO:0006974:cellular response to DNA damage stimulus
component_815	Stromal_cells,Stellate_cells	GO:0010389	regulation of G2/M transition of mitotic cell cycle	BP	2.72e-07	GO:0051726:regulation of cell cycle
component_815	Stromal_cells,Stellate_cells	GO:0046599	regulation of centriole replication	BP	2.79e-07	GO:0051726:regulation of cell cycle
component_816	Lymphatic_endothelial_cells	GO:0099178	regulation of retrograde trans-synaptic signaling by endocanabinoid	BP	1.45e-09	GO:0010646:regulation of cell communication
component_816	Lymphatic_endothelial_cells	GO:0099178	regulation of retrograde trans-synaptic signaling by endocanabinoid	BP	1.45e-09	GO:0007267:cell-cell signaling
component_816	Lymphatic_endothelial_cells	GO:0072539	T-helper 17 cell differentiation	BP	3.61e-06	GO:0046649:lymphocyte activation
component_823	Mesothelial_cells,Epicardial_fat_cells	GO:0032222	regulation of synaptic transmission, cholinergic	BP	2.8e-10	GO:0010646:regulation of cell communication
component_823	Mesothelial_cells,Epicardial_fat_cells	GO:0032222	regulation of synaptic transmission, cholinergic	BP	2.8e-10	GO:0007267:cell-cell signaling
component_845	Lymphatic_endothelial_cells	GO:1902635	1-phosphatidyl-1D-myo-inositol 4,5-bisphosphate biosynthetic process	BP	2.51e-09	GO:0044255:cellular lipid metabolic process
component_845	Lymphatic_endothelial_cells	GO:1902633	1-phosphatidyl-1D-myo-inositol 4,5-bisphosphate metabolic process	BP	2.51e-09	GO:0044255:cellular lipid metabolic process
component_849	Lymphoid_cells	GO:0043558	regulation of translational initiation in response to stress	BP	1.82e-08	GO:0009889:regulation of biosynthetic process
component_849	Lymphoid_cells	GO:0071262	regulation of translational initiation in response to starvation	BP	1.82e-08	GO:0009889:regulation of biosynthetic process
component_849	Lymphoid_cells	GO:0032058	positive regulation of translational initiation in response to stress	BP	1.82e-08	GO:0009889:regulation of biosynthetic process
component_849	Lymphoid_cells	GO:0032056	positive regulation of translation in response to stress	BP	1.82e-08	GO:0009889:regulation of biosynthetic process
component_849	Lymphoid_cells	GO:0071264	positive regulation of translational initiation in response to starvation	BP	1.82e-08	GO:0009889:regulation of biosynthetic process
component_849	Lymphoid_cells	GO:0097201	negative regulation of transcription from RNA polymerase II promoter in response to stress	BP	4.12e-16	GO:0009889:regulation of biosynthetic process
component_849	Lymphoid_cells	GO:0061179	negative regulation of insulin secretion involved in cellular response to glucose stimulus	BP	8.4e-07	GO:0010646:regulation of cell communication
component_852	Vascular_endothelial_cells	GO:1902425	positive regulation of attachment of mitotic spindle microtubules to kinetochore	BP	5.01e-09	GO:0051726:regulation of cell cycle
component_852	Vascular_endothelial_cells	GO:1902423	regulation of attachment of mitotic spindle microtubules to kinetochore	BP	5.01e-09	GO:0051726:regulation of cell cycle
component_852	Vascular_endothelial_cells	GO:0044878	mitotic cytokinesis checkpoint signaling	BP	5.01e-09	GO:0051726:regulation of cell cycle
component_852	Vascular_endothelial_cells	GO:0032466	negative regulation of cytokinesis	BP	5.01e-09	GO:0051726:regulation of cell cycle
component_852	Vascular_endothelial_cells	GO:0090235	regulation of metaphase plate congression	BP	5.01e-09	GO:0051726:regulation of cell cycle
component_852	Vascular_endothelial_cells	GO:1905115	regulation of lateral attachment of mitotic spindle microtubules to kinetochore	BP	5.01e-09	GO:0051726:regulation of cell cycle
component_852	Vascular_endothelial_cells	GO:1905116	positive regulation of lateral attachment of mitotic spindle microtubules to kinetochore	BP	5.01e-09	GO:0051726:regulation of cell cycle
component_852	Vascular_endothelial_cells	GO:0051988	regulation of attachment of spindle microtubules to kinetochore	BP	5.01e-09	GO:0051726:regulation of cell cycle
component_852	Vascular_endothelial_cells	GO:0031536	positive regulation of exit from mitosis	BP	5.01e-09	GO:0051726:regulation of cell cycle
component_852	Vascular_endothelial_cells	GO:0051987	positive regulation of attachment of spindle microtubules to kinetochore	BP	5.01e-09	GO:0051726:regulation of cell cycle
component_859	Lymphoid_cells	GO:0060369	positive regulation of Fc receptor mediated stimulatory signaling pathway	BP	1.67e-06	GO:0002682:regulation of immune system process
component_859	Lymphoid_cells	GO:0060369	positive regulation of Fc receptor mediated stimulatory signaling pathway	BP	1.67e-06	GO:0010646:regulation of cell communication
component_859	Lymphoid_cells	GO:0060369	positive regulation of Fc receptor mediated stimulatory signaling pathway	BP	1.67e-06	GO:0002757:immune response-activating signal transduction
component_859	Lymphoid_cells	GO:0060369	positive regulation of Fc receptor mediated stimulatory signaling pathway	BP	1.67e-06	GO:0009966:regulation of signal transduction
component_859	Lymphoid_cells	GO:1904155	DN2 thymocyte differentiation	BP	1.67e-06	GO:0046649:lymphocyte activation
component_859	Lymphoid_cells	GO:1905449	regulation of Fc-gamma receptor signaling pathway involved in phagocytosis	BP	1.67e-06	GO:0002682:regulation of immune system process
component_859	Lymphoid_cells	GO:1905449	regulation of Fc-gamma receptor signaling pathway involved in phagocytosis	BP	1.67e-06	GO:0010646:regulation of cell communication
component_859	Lymphoid_cells	GO:1905449	regulation of Fc-gamma receptor signaling pathway involved in phagocytosis	BP	1.67e-06	GO:0002757:immune response-activating signal transduction
component_859	Lymphoid_cells	GO:1905449	regulation of Fc-gamma receptor signaling pathway involved in phagocytosis	BP	1.67e-06	GO:0009966:regulation of signal transduction
component_859	Lymphoid_cells	GO:1905451	positive regulation of Fc-gamma receptor signaling pathway involved in phagocytosis	BP	1.67e-06	GO:0002682:regulation of immune system process
component_859	Lymphoid_cells	GO:1905451	positive regulation of Fc-gamma receptor signaling pathway involved in phagocytosis	BP	1.67e-06	GO:0010646:regulation of cell communication
component_859	Lymphoid_cells	GO:1905451	positive regulation of Fc-gamma receptor signaling pathway involved in phagocytosis	BP	1.67e-06	GO:0002757:immune response-activating signal transduction
component_859	Lymphoid_cells	GO:1905451	positive regulation of Fc-gamma receptor signaling pathway involved in phagocytosis	BP	1.67e-06	GO:0009966:regulation of signal transduction
component_859	Lymphoid_cells	GO:0060368	regulation of Fc receptor mediated stimulatory signaling pathway	BP	1.67e-06	GO:0002682:regulation of immune system process
component_859	Lymphoid_cells	GO:0060368	regulation of Fc receptor mediated stimulatory signaling pathway	BP	1.67e-06	GO:0010646:regulation of cell communication
component_859	Lymphoid_cells	GO:0060368	regulation of Fc receptor mediated stimulatory signaling pathway	BP	1.67e-06	GO:0002757:immune response-activating signal transduction
component_859	Lymphoid_cells	GO:0060368	regulation of Fc receptor mediated stimulatory signaling pathway	BP	1.67e-06	GO:0009966:regulation of signal transduction
component_859	Lymphoid_cells	GO:0001878	response to yeast	BP	2.13e-06	GO:0009605:response to external stimulus
component_862	Stromal_cells,STC2_TLX1_positive_cells,CCL19_CCL21_positive_cells	GO:0031536	positive regulation of exit from mitosis	BP	1.02e-06	GO:0051726:regulation of cell cycle
component_862	Stromal_cells,STC2_TLX1_positive_cells,CCL19_CCL21_positive_cells	GO:0006301	postreplication repair	BP	1.2e-06	GO:0006974:cellular response to DNA damage stimulus
component_868	Lymphoid_cells	GO:0000075	cell cycle checkpoint signaling	BP	6.82e-15	GO:0051726:regulation of cell cycle
component_874	Mesothelial_cells,Epicardial_fat_cells	GO:0010513	positive regulation of phosphatidylinositol biosynthetic process	BP	5.03e-07	GO:0044255:cellular lipid metabolic process
component_874	Mesothelial_cells,Epicardial_fat_cells	GO:0010513	positive regulation of phosphatidylinositol biosynthetic process	BP	5.03e-07	GO:0009889:regulation of biosynthetic process
component_876	Squamous_epithelial_cells,Corneal_and_conjunctival_epithelial_cells	GO:0002523	leukocyte migration involved in inflammatory response	BP	7.67e-08	GO:0048870:cell motility
component_880	Erythroblasts	GO:0050929	induction of negative chemotaxis	BP	1.64e-08	GO:0009605:response to external stimulus
component_880	Erythroblasts	GO:0050924	positive regulation of negative chemotaxis	BP	1.64e-08	GO:0009605:response to external stimulus
component_880	Erythroblasts	GO:0021972	corticospinal neuron axon guidance through spinal cord	BP	1.64e-08	GO:0097485:neuron projection guidance
component_880	Erythroblasts	GO:0021972	corticospinal neuron axon guidance through spinal cord	BP	1.64e-08	GO:0007411:axon guidance
component_880	Erythroblasts	GO:0090027	negative regulation of monocyte chemotaxis	BP	1.64e-08	GO:0002682:regulation of immune system process
component_880	Erythroblasts	GO:0090027	negative regulation of monocyte chemotaxis	BP	1.64e-08	GO:0048870:cell motility
component_880	Erythroblasts	GO:0090027	negative regulation of monocyte chemotaxis	BP	1.64e-08	GO:0009605:response to external stimulus
component_880	Erythroblasts	GO:0002291	T cell activation via T cell receptor contact with antigen bound to MHC molecule on antigen presenting cell	BP	9.06e-07	GO:0046649:lymphocyte activation
component_906	Lymphoid_cells	GO:0071673	positive regulation of smooth muscle cell chemotaxis	BP	5.38e-07	GO:0048870:cell motility
component_906	Lymphoid_cells	GO:0071673	positive regulation of smooth muscle cell chemotaxis	BP	5.38e-07	GO:0009605:response to external stimulus
component_906	Lymphoid_cells	GO:0046462	monoacylglycerol metabolic process	BP	5.38e-07	GO:0044255:cellular lipid metabolic process
component_906	Lymphoid_cells	GO:0006640	monoacylglycerol biosynthetic process	BP	5.38e-07	GO:0044255:cellular lipid metabolic process
component_911	Lymphatic_endothelial_cells	GO:0002590	negative regulation of antigen processing and presentation of peptide antigen via MHC class I	BP	2.91e-09	GO:0002682:regulation of immune system process
component_911	Lymphatic_endothelial_cells	GO:0002590	negative regulation of antigen processing and presentation of peptide antigen via MHC class I	BP	2.91e-09	GO:0019882:antigen processing and presentation
component_911	Lymphatic_endothelial_cells	GO:0002583	regulation of antigen processing and presentation of peptide antigen	BP	2.91e-09	GO:0002682:regulation of immune system process
component_911	Lymphatic_endothelial_cells	GO:0002583	regulation of antigen processing and presentation of peptide antigen	BP	2.91e-09	GO:0019882:antigen processing and presentation
component_911	Lymphatic_endothelial_cells	GO:0002589	regulation of antigen processing and presentation of peptide antigen via MHC class I	BP	2.91e-09	GO:0002682:regulation of immune system process
component_911	Lymphatic_endothelial_cells	GO:0002589	regulation of antigen processing and presentation of peptide antigen via MHC class I	BP	2.91e-09	GO:0019882:antigen processing and presentation
component_916	Limbic_system_neurons,SLC24A4_PEX5L_positive_cells,Inhibitory_neurons	GO:0051464	positive regulation of cortisol secretion	BP	3e-06	GO:0010646:regulation of cell communication
component_916	Limbic_system_neurons,SLC24A4_PEX5L_positive_cells,Inhibitory_neurons	GO:2000833	positive regulation of steroid hormone secretion	BP	3e-06	GO:0010646:regulation of cell communication
component_916	Limbic_system_neurons,SLC24A4_PEX5L_positive_cells,Inhibitory_neurons	GO:2000831	regulation of steroid hormone secretion	BP	3e-06	GO:0010646:regulation of cell communication
component_916	Limbic_system_neurons,SLC24A4_PEX5L_positive_cells,Inhibitory_neurons	GO:1902606	regulation of large conductance calcium-activated potassium channel activity	BP	3e-06	GO:0034765:regulation of ion transmembrane transport
component_916	Limbic_system_neurons,SLC24A4_PEX5L_positive_cells,Inhibitory_neurons	GO:1902606	regulation of large conductance calcium-activated potassium channel activity	BP	3e-06	GO:0043269:regulation of ion transport
component_916	Limbic_system_neurons,SLC24A4_PEX5L_positive_cells,Inhibitory_neurons	GO:1902608	positive regulation of large conductance calcium-activated potassium channel activity	BP	3e-06	GO:0034765:regulation of ion transmembrane transport
component_916	Limbic_system_neurons,SLC24A4_PEX5L_positive_cells,Inhibitory_neurons	GO:1902608	positive regulation of large conductance calcium-activated potassium channel activity	BP	3e-06	GO:0043269:regulation of ion transport
component_916	Limbic_system_neurons,SLC24A4_PEX5L_positive_cells,Inhibitory_neurons	GO:2000846	regulation of corticosteroid hormone secretion	BP	3e-06	GO:0010646:regulation of cell communication
component_925	Erythroblasts	GO:0030049	muscle filament sliding	BP	1.49e-07	GO:0070252:actin-mediated cell contraction
component_926	Lymphoid_cells	GO:0002590	negative regulation of antigen processing and presentation of peptide antigen via MHC class I	BP	6.34e-07	GO:0002682:regulation of immune system process
component_926	Lymphoid_cells	GO:0002590	negative regulation of antigen processing and presentation of peptide antigen via MHC class I	BP	6.34e-07	GO:0019882:antigen processing and presentation
component_972	Stromal_cells	GO:0019732	antifungal humoral response	BP	7.81e-16	GO:0009605:response to external stimulus
