# Supplementary material for: A unified analysis of atlas single-cell data
Source: HighWire-hosted journal article supplement (doi:10.1101/gr.279631.124), 2025-02-18
Supplement: Supplemental_Table_S4.xlsx [file Supplemental_Table_S4.xlsx]

## Sheet: Table S4
Table S4: Bimodal genes.
gene	cluster	known function	GO	branch	name	p fdr bh	neighbor genes with this GO	in cell clusters
A2M	cluster_3	No	GO:0000768	BP	syncytium formation by plasma membrane fusion	0.0277441	CD9,ITGB1	rna_Heart_c2,rna_Thymus_c3,rna_Heart_c10
A2M	cluster_3	No	GO:0001775	BP	cell activation	0.00807434	CD9,FCGR2B,ITGB1,MSN,NOTCH2,PLCG2	rna_Heart_c2,rna_Thymus_c3,rna_Heart_c10
A2M	cluster_3	No	GO:0001885	BP	endothelial cell development	0.0205015	MSN,PECAM1	rna_Heart_c2,rna_Thymus_c3,rna_Heart_c10
A2M	cluster_3	No	GO:0002064	BP	epithelial cell development	0.0107752	MSN,MYO1E,PECAM1	rna_Heart_c2,rna_Thymus_c3,rna_Heart_c10
A2M	cluster_3	No	GO:0002221	BP	pattern recognition receptor signaling pathway	0.000260739	COLEC12,PLCG2,PRKCE,RPS6KA3	rna_Heart_c2,rna_Thymus_c3,rna_Heart_c10
A2M	cluster_3	No	GO:0002224	BP	toll-like receptor signaling pathway	0.000139375	COLEC12,PLCG2,PRKCE,RPS6KA3	rna_Heart_c2,rna_Thymus_c3,rna_Heart_c10
A2M	cluster_3	No	GO:0002263	BP	cell activation involved in immune response	0.0440068	FCGR2B,NOTCH2,PLCG2	rna_Heart_c2,rna_Thymus_c3,rna_Heart_c10
A2M	cluster_3	No	GO:0002313	BP	mature B cell differentiation involved in immune response	0.0205015	FCGR2B,NOTCH2	rna_Heart_c2,rna_Thymus_c3,rna_Heart_c10
A2M	cluster_3	No	GO:0002335	BP	mature B cell differentiation	0.0205015	FCGR2B,NOTCH2	rna_Heart_c2,rna_Thymus_c3,rna_Heart_c10
A2M	cluster_3	No	GO:0002366	BP	leukocyte activation involved in immune response	0.040707	FCGR2B,NOTCH2,PLCG2	rna_Heart_c2,rna_Thymus_c3,rna_Heart_c10
A2M	cluster_3	No	GO:0002431	BP	Fc receptor mediated stimulatory signaling pathway	0.0277441	FCGR2B,PRKCE	rna_Heart_c2,rna_Thymus_c3,rna_Heart_c10
A2M	cluster_3	No	GO:0002433	BP	immune response-regulating cell surface receptor signaling pathway involved in phagocytosis	0.0205015	FCGR2B,PRKCE	rna_Heart_c2,rna_Thymus_c3,rna_Heart_c10
A2M	cluster_3	No	GO:0002521	BP	leukocyte differentiation	0.0197437	FCGR2B,ITGB1,NOTCH2,PLCG2	rna_Heart_c2,rna_Thymus_c3,rna_Heart_c10
A2M	cluster_3	No	GO:0002764	BP	immune response-regulating signaling pathway	0.019932	COLEC12,FCGR2B,PLCG2,PRKCE,RPS6KA3	rna_Heart_c2,rna_Thymus_c3,rna_Heart_c10
A2M	cluster_3	No	GO:0003013	BP	circulatory system process	0.0313178	BMPR2,CD36,FABP5,SLC1A3	rna_Heart_c2,rna_Thymus_c3,rna_Heart_c10
A2M	cluster_3	No	GO:0003018	BP	vascular process in circulatory system	0.0176894	BMPR2,CD36,FABP5,SLC1A3	rna_Heart_c2,rna_Thymus_c3,rna_Heart_c10
A2M	cluster_3	No	GO:0006109	BP	regulation of carbohydrate metabolic process	0.0156486	CLTC,PDK4,PRKCE	rna_Heart_c2,rna_Thymus_c3,rna_Heart_c10
A2M	cluster_3	No	GO:0006468	BP	protein phosphorylation	0.0186498	BMPR2,ERC1,PDK4,PRKCE,RPS6KA3	rna_Heart_c2,rna_Thymus_c3,rna_Heart_c10
A2M	cluster_3	No	GO:0006873	BP	cellular ion homeostasis	0.0138576	ATP6AP1,ATP6V0E1,BCAP31,CD36,PLCG2,SLC40A1	rna_Heart_c2,rna_Thymus_c3,rna_Heart_c10
A2M	cluster_3	No	GO:0006875	BP	cellular metal ion homeostasis	0.0364988	ATP6AP1,BCAP31,CD36,PLCG2,SLC40A1	rna_Heart_c2,rna_Thymus_c3,rna_Heart_c10
A2M	cluster_3	No	GO:0006885	BP	regulation of pH	0.0156486	ATP6AP1,ATP6V0E1,PDK4	rna_Heart_c2,rna_Thymus_c3,rna_Heart_c10
A2M	cluster_3	No	GO:0006897	BP	endocytosis	2.37973e-05	APOE,CD36,CD9,CLTC,FCGR2B,ITGB1,MYO1E	rna_Heart_c2,rna_Thymus_c3,rna_Heart_c10
A2M	cluster_3	No	GO:0006898	BP	receptor-mediated endocytosis	4.61749e-05	APOE,CD36,CD9,CLTC,FCGR2B,ITGB1	rna_Heart_c2,rna_Thymus_c3,rna_Heart_c10
A2M	cluster_3	No	GO:0006949	BP	syncytium formation	0.0277441	CD9,ITGB1	rna_Heart_c2,rna_Thymus_c3,rna_Heart_c10
A2M	cluster_3	No	GO:0007010	BP	cytoskeleton organization	0.0364988	APOE,ARHGAP10,ITGB1,PHACTR2,TUBA1B	rna_Heart_c2,rna_Thymus_c3,rna_Heart_c10
A2M	cluster_3	No	GO:0007154	BP	cell communication	0.00816552	APOE,BMPR2,ERC1,GPNMB,PDK4,RPS6KA3,SLC1A3	rna_Heart_c2,rna_Thymus_c3,rna_Heart_c10
A2M	cluster_3	No	GO:0007159	BP	leukocyte cell-cell adhesion	0.0156486	ITGB1,MSN,PECAM1	rna_Heart_c2,rna_Thymus_c3,rna_Heart_c10
A2M	cluster_3	No	GO:0007162	BP	negative regulation of cell adhesion	0.0344147	BCAS3,CD9,FCGR2B,GPNMB	rna_Heart_c2,rna_Thymus_c3,rna_Heart_c10
A2M	cluster_3	No	GO:0007263	BP	nitric oxide mediated signal transduction	0.0205015	APOE,CD36	rna_Heart_c2,rna_Thymus_c3,rna_Heart_c10
A2M	cluster_3	No	GO:0007268	BP	chemical synaptic transmission	0.026376	APOE,ERC1,RPS6KA3,SLC1A3	rna_Heart_c2,rna_Thymus_c3,rna_Heart_c10
A2M	cluster_3	No	GO:0007520	BP	myoblast fusion	0.0277441	CD9,ITGB1	rna_Heart_c2,rna_Thymus_c3,rna_Heart_c10
A2M	cluster_3	No	GO:0008037	BP	cell recognition	0.00775492	CD9,COLEC12,MSN,PECAM1,VCAN	rna_Heart_c2,rna_Thymus_c3,rna_Heart_c10
A2M	cluster_3	No	GO:0008104	BP	protein localization	0.0277441	APOE,ATP6AP1,BCAP31,CD36,CLTC,XRCC5	rna_Heart_c2,rna_Thymus_c3,rna_Heart_c10
A2M	cluster_3	No	GO:0009719	BP	response to endogenous stimulus	0.0101301	BCAS3,BMPR2,CD36,CD9,FCGR2B,ITGB1	rna_Heart_c2,rna_Thymus_c3,rna_Heart_c10
A2M	cluster_3	No	GO:0009894	BP	regulation of catabolic process	0.00526787	APOE,ATP6V0E1,BCAP31,ITGB1,MSN,SH3RF3	rna_Heart_c2,rna_Thymus_c3,rna_Heart_c10
A2M	cluster_3	No	GO:0009896	BP	positive regulation of catabolic process	0.0280008	APOE,BCAP31,MSN,SH3RF3	rna_Heart_c2,rna_Thymus_c3,rna_Heart_c10
A2M	cluster_3	No	GO:0009991	BP	response to extracellular stimulus	0.00639521	APOE,BCAS3,BMPR2,PDK4	rna_Heart_c2,rna_Thymus_c3,rna_Heart_c10
A2M	cluster_3	No	GO:0010232	BP	vascular transport	0.0205015	CD36,FABP5,SLC1A3	rna_Heart_c2,rna_Thymus_c3,rna_Heart_c10
A2M	cluster_3	No	GO:0010544	BP	negative regulation of platelet activation	0.0205015	APOE,CD9	rna_Heart_c2,rna_Thymus_c3,rna_Heart_c10
A2M	cluster_3	No	GO:0010632	BP	regulation of epithelial cell migration	0.00221924	APOE,BCAS3,BMPR2,PLCG2,PRKCE	rna_Heart_c2,rna_Thymus_c3,rna_Heart_c10
A2M	cluster_3	No	GO:0010634	BP	positive regulation of epithelial cell migration	0.00425335	BCAS3,BMPR2,PLCG2,PRKCE	rna_Heart_c2,rna_Thymus_c3,rna_Heart_c10
A2M	cluster_3	No	GO:0010638	BP	positive regulation of organelle organization	0.0442909	BCAS3,HNRNPA2B1,PRKCE,XRCC5	rna_Heart_c2,rna_Thymus_c3,rna_Heart_c10
A2M	cluster_3	No	GO:0010762	BP	regulation of fibroblast migration	0.0205015	ITGB1,PRKCE	rna_Heart_c2,rna_Thymus_c3,rna_Heart_c10
A2M	cluster_3	No	GO:0010763	BP	positive regulation of fibroblast migration	0.00392349	ITGB1,PRKCE	rna_Heart_c2,rna_Thymus_c3,rna_Heart_c10
A2M	cluster_3	No	GO:0015031	BP	protein transport	0.0105016	APOE,ATP6AP1,BCAP31,CD36,CLTC	rna_Heart_c2,rna_Thymus_c3,rna_Heart_c10
A2M	cluster_3	No	GO:0015849	BP	organic acid transport	0.0197437	APOE,CD36,FABP5,SLC1A3	rna_Heart_c2,rna_Thymus_c3,rna_Heart_c10
A2M	cluster_3	No	GO:0015908	BP	fatty acid transport	0.0126633	APOE,CD36,FABP5	rna_Heart_c2,rna_Thymus_c3,rna_Heart_c10
A2M	cluster_3	No	GO:0015909	BP	long-chain fatty acid transport	0.0042022	APOE,CD36,FABP5	rna_Heart_c2,rna_Thymus_c3,rna_Heart_c10
A2M	cluster_3	No	GO:0016192	BP	vesicle-mediated transport	1.33469e-06	APOE,ATP6AP1,BCAP31,CD36,CD9,CLTC,ERC1,FCGR2B,ITGB1,MYO1E,PECAM1	rna_Heart_c2,rna_Thymus_c3,rna_Heart_c10
A2M	cluster_3	No	GO:0016197	BP	endosomal transport	0.0126633	ATP6AP1,CLTC,ERC1	rna_Heart_c2,rna_Thymus_c3,rna_Heart_c10
A2M	cluster_3	No	GO:0016310	BP	phosphorylation	0.0241109	BMPR2,ERC1,PDK4,PRKCE,RPS6KA3	rna_Heart_c2,rna_Thymus_c3,rna_Heart_c10
A2M	cluster_3	No	GO:0019725	BP	cellular homeostasis	0.0275232	ATP6AP1,ATP6V0E1,BCAP31,CD36,PLCG2,SLC40A1	rna_Heart_c2,rna_Thymus_c3,rna_Heart_c10
A2M	cluster_3	No	GO:0019932	BP	second-messenger-mediated signaling	0.0156486	APOE,BCAP31,CD36,PLCG2	rna_Heart_c2,rna_Thymus_c3,rna_Heart_c10
A2M	cluster_3	No	GO:0019934	BP	cGMP-mediated signaling	0.0277441	APOE,CD36	rna_Heart_c2,rna_Thymus_c3,rna_Heart_c10
A2M	cluster_3	No	GO:0030003	BP	cellular cation homeostasis	0.0131549	ATP6AP1,ATP6V0E1,BCAP31,CD36,PLCG2,SLC40A1	rna_Heart_c2,rna_Thymus_c3,rna_Heart_c10
A2M	cluster_3	No	GO:0030098	BP	lymphocyte differentiation	0.00918664	FCGR2B,ITGB1,NOTCH2,PLCG2	rna_Heart_c2,rna_Thymus_c3,rna_Heart_c10
A2M	cluster_3	No	GO:0030162	BP	regulation of proteolysis	0.019932	APOE,ASPH,BCAP31,RPS6KA3,SH3RF3	rna_Heart_c2,rna_Thymus_c3,rna_Heart_c10
A2M	cluster_3	No	GO:0030183	BP	B cell differentiation	0.000952965	FCGR2B,ITGB1,NOTCH2,PLCG2	rna_Heart_c2,rna_Thymus_c3,rna_Heart_c10
A2M	cluster_3	No	GO:0030334	BP	regulation of cell migration	0.000555482	APOE,BCAS3,BMPR2,GPNMB,ITGB1,MSN,PECAM1,PLCG2,PRKCE	rna_Heart_c2,rna_Thymus_c3,rna_Heart_c10
A2M	cluster_3	No	GO:0030335	BP	positive regulation of cell migration	0.00114613	BCAS3,BMPR2,GPNMB,ITGB1,PECAM1,PLCG2,PRKCE	rna_Heart_c2,rna_Thymus_c3,rna_Heart_c10
A2M	cluster_3	No	GO:0031329	BP	regulation of cellular catabolic process	0.0186498	APOE,ATP6V0E1,BCAP31,MSN,SH3RF3	rna_Heart_c2,rna_Thymus_c3,rna_Heart_c10
A2M	cluster_3	No	GO:0031331	BP	positive regulation of cellular catabolic process	0.0176894	APOE,BCAP31,MSN,SH3RF3	rna_Heart_c2,rna_Thymus_c3,rna_Heart_c10
A2M	cluster_3	No	GO:0031334	BP	positive regulation of protein-containing complex assembly	0.0344147	CD36,PLCG2,PRKCE	rna_Heart_c2,rna_Thymus_c3,rna_Heart_c10
A2M	cluster_3	No	GO:0031401	BP	positive regulation of protein modification process	0.0344147	BMPR2,GPNMB,KANSL1,PECAM1,PLCG2,XRCC5	rna_Heart_c2,rna_Thymus_c3,rna_Heart_c10
A2M	cluster_3	No	GO:0031623	BP	receptor internalization	0.000832291	CD36,CD9,CLTC,ITGB1	rna_Heart_c2,rna_Thymus_c3,rna_Heart_c10
A2M	cluster_3	No	GO:0031667	BP	response to nutrient levels	0.00585315	APOE,BCAS3,BMPR2,PDK4	rna_Heart_c2,rna_Thymus_c3,rna_Heart_c10
A2M	cluster_3	No	GO:0032204	BP	regulation of telomere maintenance	0.0344147	HNRNPA2B1,XRCC5	rna_Heart_c2,rna_Thymus_c3,rna_Heart_c10
A2M	cluster_3	No	GO:0032206	BP	positive regulation of telomere maintenance	0.0344147	HNRNPA2B1,XRCC5	rna_Heart_c2,rna_Thymus_c3,rna_Heart_c10
A2M	cluster_3	No	GO:0032388	BP	positive regulation of intracellular transport	0.0256058	BCAP31,BCAS3,MSN	rna_Heart_c2,rna_Thymus_c3,rna_Heart_c10
A2M	cluster_3	No	GO:0032880	BP	regulation of protein localization	0.00017409	APOE,BCAP31,BCAS3,CLTC,ITGB1,MSN,PECAM1,PRKCE	rna_Heart_c2,rna_Thymus_c3,rna_Heart_c10
A2M	cluster_3	No	GO:0032956	BP	regulation of actin cytoskeleton organization	0.0186498	ARHGAP18,BCAS3,NOTCH2,PRKCE	rna_Heart_c2,rna_Thymus_c3,rna_Heart_c10
A2M	cluster_3	No	GO:0032970	BP	regulation of actin filament-based process	0.0280008	ARHGAP18,BCAS3,NOTCH2,PRKCE	rna_Heart_c2,rna_Thymus_c3,rna_Heart_c10
A2M	cluster_3	No	GO:0033036	BP	macromolecule localization	0.0278801	APOE,ATP6AP1,BCAP31,CD36,CLTC,XRCC5	rna_Heart_c2,rna_Thymus_c3,rna_Heart_c10
A2M	cluster_3	No	GO:0033043	BP	regulation of organelle organization	0.000931779	ARHGAP18,BCAS3,CLTC,HNRNPA2B1,MSN,NOTCH2,PRKCE,XRCC5	rna_Heart_c2,rna_Thymus_c3,rna_Heart_c10
A2M	cluster_3	No	GO:0033554	BP	cellular response to stress	0.0156569	BCAP31,BMPR2,EPAS1,PDK4,RPS6KA3,XRCC5	rna_Heart_c2,rna_Thymus_c3,rna_Heart_c10
A2M	cluster_3	No	GO:0033993	BP	response to lipid	0.0220927	CD36,MSN,PDK4,PLCG2,RPS6KA3	rna_Heart_c2,rna_Thymus_c3,rna_Heart_c10
A2M	cluster_3	No	GO:0034248	BP	regulation of cellular amide metabolic process	0.0472855	APOE,PDK4,RPS6KA3	rna_Heart_c2,rna_Thymus_c3,rna_Heart_c10
A2M	cluster_3	No	GO:0035633	BP	maintenance of blood-brain barrier	0.0344147	ITGB1,PECAM1	rna_Heart_c2,rna_Thymus_c3,rna_Heart_c10
A2M	cluster_3	No	GO:0038093	BP	Fc receptor signaling pathway	0.00526787	FCGR2B,PLCG2,PRKCE	rna_Heart_c2,rna_Thymus_c3,rna_Heart_c10
A2M	cluster_3	No	GO:0038094	BP	Fc-gamma receptor signaling pathway	0.0344147	FCGR2B,PRKCE	rna_Heart_c2,rna_Thymus_c3,rna_Heart_c10
A2M	cluster_3	No	GO:0038096	BP	Fc-gamma receptor signaling pathway involved in phagocytosis	0.0205015	FCGR2B,PRKCE	rna_Heart_c2,rna_Thymus_c3,rna_Heart_c10
A2M	cluster_3	No	GO:0040012	BP	regulation of locomotion	0.000137099	APOE,ARHGAP18,BCAS3,BMPR2,GPNMB,ITGB1,MSN,PECAM1,PLCG2,PRKCE	rna_Heart_c2,rna_Thymus_c3,rna_Heart_c10
A2M	cluster_3	No	GO:0040017	BP	positive regulation of locomotion	0.00150771	BCAS3,BMPR2,GPNMB,ITGB1,PECAM1,PLCG2,PRKCE	rna_Heart_c2,rna_Thymus_c3,rna_Heart_c10
A2M	cluster_3	No	GO:0042113	BP	B cell activation	0.00357554	FCGR2B,ITGB1,NOTCH2,PLCG2	rna_Heart_c2,rna_Thymus_c3,rna_Heart_c10
A2M	cluster_3	No	GO:0042176	BP	regulation of protein catabolic process	0.0133088	APOE,BCAP31,MSN,SH3RF3	rna_Heart_c2,rna_Thymus_c3,rna_Heart_c10
A2M	cluster_3	No	GO:0042594	BP	response to starvation	0.0141283	BCAS3,BMPR2,PDK4	rna_Heart_c2,rna_Thymus_c3,rna_Heart_c10
A2M	cluster_3	No	GO:0042981	BP	regulation of apoptotic process	0.0183974	APOE,ARHGAP10,BCAP31,ITGB1,NOTCH2,PDK4,RPS6KA3	rna_Heart_c2,rna_Thymus_c3,rna_Heart_c10
A2M	cluster_3	No	GO:0043066	BP	negative regulation of apoptotic process	0.0126633	APOE,ARHGAP10,ITGB1,NOTCH2,PDK4,RPS6KA3	rna_Heart_c2,rna_Thymus_c3,rna_Heart_c10
A2M	cluster_3	No	GO:0043067	BP	regulation of programmed cell death	0.019932	APOE,ARHGAP10,BCAP31,ITGB1,NOTCH2,PDK4,RPS6KA3	rna_Heart_c2,rna_Thymus_c3,rna_Heart_c10
A2M	cluster_3	No	GO:0043069	BP	negative regulation of programmed cell death	0.0134044	APOE,ARHGAP10,ITGB1,NOTCH2,PDK4,RPS6KA3	rna_Heart_c2,rna_Thymus_c3,rna_Heart_c10
A2M	cluster_3	No	GO:0043085	BP	positive regulation of catalytic activity	0.0161674	APOE,ASPH,BCAP31,BCAS3,HNRNPA2B1,ITGB1,XRCC5	rna_Heart_c2,rna_Thymus_c3,rna_Heart_c10
A2M	cluster_3	No	GO:0043112	BP	receptor metabolic process	0.00114613	CD36,CD9,CLTC,ITGB1	rna_Heart_c2,rna_Thymus_c3,rna_Heart_c10
A2M	cluster_3	No	GO:0043254	BP	regulation of protein-containing complex assembly	0.0041944	APOE,ARHGAP18,CD36,PLCG2,PRKCE	rna_Heart_c2,rna_Thymus_c3,rna_Heart_c10
A2M	cluster_3	No	GO:0043408	BP	regulation of MAPK cascade	0.00274032	APOE,CD36,FCGR2B,GPNMB,NOTCH2,PLCG2,SH3RF3	rna_Heart_c2,rna_Thymus_c3,rna_Heart_c10
A2M	cluster_3	No	GO:0043410	BP	positive regulation of MAPK cascade	0.00073531	APOE,CD36,FCGR2B,GPNMB,NOTCH2,PLCG2,SH3RF3	rna_Heart_c2,rna_Thymus_c3,rna_Heart_c10
A2M	cluster_3	No	GO:0044087	BP	regulation of cellular component biogenesis	0.000599875	APOE,ARHGAP18,BCAS3,CD36,MSN,PLCG2,PRKCE,XRCC5	rna_Heart_c2,rna_Thymus_c3,rna_Heart_c10
A2M	cluster_3	No	GO:0045184	BP	establishment of protein localization	0.0138576	APOE,ATP6AP1,BCAP31,CD36,CLTC	rna_Heart_c2,rna_Thymus_c3,rna_Heart_c10
A2M	cluster_3	No	GO:0045321	BP	leukocyte activation	0.0205015	FCGR2B,ITGB1,MSN,NOTCH2,PLCG2	rna_Heart_c2,rna_Thymus_c3,rna_Heart_c10
A2M	cluster_3	No	GO:0045732	BP	positive regulation of protein catabolic process	0.00701995	APOE,BCAP31,MSN,SH3RF3	rna_Heart_c2,rna_Thymus_c3,rna_Heart_c10
A2M	cluster_3	No	GO:0045862	BP	positive regulation of proteolysis	0.0176894	APOE,ASPH,BCAP31,SH3RF3	rna_Heart_c2,rna_Thymus_c3,rna_Heart_c10
A2M	cluster_3	No	GO:0046649	BP	lymphocyte activation	0.0068232	FCGR2B,ITGB1,MSN,NOTCH2,PLCG2	rna_Heart_c2,rna_Thymus_c3,rna_Heart_c10
A2M	cluster_3	No	GO:0046907	BP	intracellular transport	9.17749e-05	APOE,ATP6AP1,BCAP31,CLTC,ERC1,HNRNPA2B1,MYO1E,TUBA1B	rna_Heart_c2,rna_Thymus_c3,rna_Heart_c10
A2M	cluster_3	No	GO:0048468	BP	cell development	0.00807434	ATP6AP1,BMPR2,MSN,MYO1E,PECAM1	rna_Heart_c2,rna_Thymus_c3,rna_Heart_c10
A2M	cluster_3	No	GO:0048660	BP	regulation of smooth muscle cell proliferation	0.040707	APOE,BMPR2,XRCC5	rna_Heart_c2,rna_Thymus_c3,rna_Heart_c10
A2M	cluster_3	No	GO:0048771	BP	tissue remodeling	0.0440068	BMPR2,NOTCH2	rna_Heart_c2,rna_Thymus_c3,rna_Heart_c10
A2M	cluster_3	No	GO:0048871	BP	multicellular organismal homeostasis	0.0228325	CD36,METRNL,SLC40A1	rna_Heart_c2,rna_Thymus_c3,rna_Heart_c10
A2M	cluster_3	No	GO:0048878	BP	chemical homeostasis	0.00326074	APOE,ATP6AP1,ATP6V0E1,BCAP31,CD36,PDK4,PLCG2,SLC40A1	rna_Heart_c2,rna_Thymus_c3,rna_Heart_c10
A2M	cluster_3	No	GO:0050727	BP	regulation of inflammatory response	0.0464294	APOE,FCGR2B,METRNL,PLCG2	rna_Heart_c2,rna_Thymus_c3,rna_Heart_c10
A2M	cluster_3	No	GO:0050728	BP	negative regulation of inflammatory response	0.0344147	APOE,FCGR2B,METRNL	rna_Heart_c2,rna_Thymus_c3,rna_Heart_c10
A2M	cluster_3	No	GO:0050801	BP	ion homeostasis	0.00476279	ATP6AP1,ATP6V0E1,BCAP31,CD36,PDK4,PLCG2,SLC40A1	rna_Heart_c2,rna_Thymus_c3,rna_Heart_c10
A2M	cluster_3	No	GO:0050866	BP	negative regulation of cell activation	0.0141283	APOE,CD9,FCGR2B,GPNMB	rna_Heart_c2,rna_Thymus_c3,rna_Heart_c10
A2M	cluster_3	No	GO:0051050	BP	positive regulation of transport	0.0077663	APOE,BCAP31,BCAS3,FCGR2B,ITGB1,MSN,PLCG2	rna_Heart_c2,rna_Thymus_c3,rna_Heart_c10
A2M	cluster_3	No	GO:0051056	BP	regulation of small GTPase mediated signal transduction	0.0115058	APOE,ARHGAP10,ARHGAP18,NOTCH2	rna_Heart_c2,rna_Thymus_c3,rna_Heart_c10
A2M	cluster_3	No	GO:0051092	BP	positive regulation of NF-kappaB transcription factor activity	0.0324424	CD36,ERC1,PLCG2	rna_Heart_c2,rna_Thymus_c3,rna_Heart_c10
A2M	cluster_3	No	GO:0051130	BP	positive regulation of cellular component organization	0.00636022	APOE,BCAS3,CD36,HNRNPA2B1,PLCG2,PRKCE,XRCC5	rna_Heart_c2,rna_Thymus_c3,rna_Heart_c10
A2M	cluster_3	No	GO:0051270	BP	regulation of cellular component movement	2.76709e-05	APOE,ARHGAP18,BCAS3,BMPR2,CD9,GPNMB,ITGB1,MSN,PECAM1,PLCG2,PRKCE	rna_Heart_c2,rna_Thymus_c3,rna_Heart_c10
A2M	cluster_3	No	GO:0051272	BP	positive regulation of cellular component movement	0.00129429	BCAS3,BMPR2,GPNMB,ITGB1,PECAM1,PLCG2,PRKCE	rna_Heart_c2,rna_Thymus_c3,rna_Heart_c10
A2M	cluster_3	No	GO:0051493	BP	regulation of cytoskeleton organization	0.00998032	ARHGAP18,BCAS3,CLTC,NOTCH2,PRKCE	rna_Heart_c2,rna_Thymus_c3,rna_Heart_c10
A2M	cluster_3	No	GO:0051641	BP	cellular localization	0.000163922	APOE,ATP6AP1,BCAP31,CLTC,ERC1,HNRNPA2B1,ITGB1,MYO1E,TUBA1B,XRCC5	rna_Heart_c2,rna_Thymus_c3,rna_Heart_c10
A2M	cluster_3	No	GO:0051649	BP	establishment of localization in cell	3.47422e-05	APOE,ATP6AP1,BCAP31,CLTC,ERC1,HNRNPA2B1,ITGB1,MYO1E,PLCG2,TUBA1B	rna_Heart_c2,rna_Thymus_c3,rna_Heart_c10
A2M	cluster_3	No	GO:0051972	BP	regulation of telomerase activity	0.0440068	HNRNPA2B1,XRCC5	rna_Heart_c2,rna_Thymus_c3,rna_Heart_c10
A2M	cluster_3	No	GO:0055065	BP	metal ion homeostasis	0.0474594	ATP6AP1,BCAP31,CD36,PLCG2,SLC40A1	rna_Heart_c2,rna_Thymus_c3,rna_Heart_c10
A2M	cluster_3	No	GO:0055067	BP	monovalent inorganic cation homeostasis	0.0472855	ATP6AP1,ATP6V0E1,PDK4	rna_Heart_c2,rna_Thymus_c3,rna_Heart_c10
A2M	cluster_3	No	GO:0055080	BP	cation homeostasis	0.00358353	ATP6AP1,ATP6V0E1,BCAP31,CD36,PDK4,PLCG2,SLC40A1	rna_Heart_c2,rna_Thymus_c3,rna_Heart_c10
A2M	cluster_3	No	GO:0055082	BP	cellular chemical homeostasis	0.0177348	ATP6AP1,ATP6V0E1,BCAP31,CD36,PLCG2,SLC40A1	rna_Heart_c2,rna_Thymus_c3,rna_Heart_c10
A2M	cluster_3	No	GO:0055094	BP	response to lipoprotein particle	0.000832291	CD36,CD9,ITGB1	rna_Heart_c2,rna_Thymus_c3,rna_Heart_c10
A2M	cluster_3	No	GO:0060341	BP	regulation of cellular localization	0.00552533	BCAP31,BCAS3,CLTC,ITGB1,MSN,PRKCE	rna_Heart_c2,rna_Thymus_c3,rna_Heart_c10
A2M	cluster_3	No	GO:0060413	BP	atrial septum morphogenesis	0.0277441	BMPR2,NOTCH2	rna_Heart_c2,rna_Thymus_c3,rna_Heart_c10
A2M	cluster_3	No	GO:0060548	BP	negative regulation of cell death	0.0040615	APOE,ARHGAP10,GPNMB,ITGB1,NOTCH2,PDK4,RPS6KA3	rna_Heart_c2,rna_Thymus_c3,rna_Heart_c10
A2M	cluster_3	No	GO:0061028	BP	establishment of endothelial barrier	0.0205015	MSN,PECAM1	rna_Heart_c2,rna_Thymus_c3,rna_Heart_c10
A2M	cluster_3	No	GO:0061041	BP	regulation of wound healing	0.00279709	APOE,CD9,ITGB1,PRKCE	rna_Heart_c2,rna_Thymus_c3,rna_Heart_c10
A2M	cluster_3	No	GO:0061136	BP	regulation of proteasomal protein catabolic process	0.0156486	APOE,BCAP31,SH3RF3	rna_Heart_c2,rna_Thymus_c3,rna_Heart_c10
A2M	cluster_3	No	GO:0070374	BP	positive regulation of ERK1 and ERK2 cascade	0.0277441	APOE,CD36,GPNMB,NOTCH2	rna_Heart_c2,rna_Thymus_c3,rna_Heart_c10
A2M	cluster_3	No	GO:0070542	BP	response to fatty acid	0.0344147	CD36,PDK4	rna_Heart_c2,rna_Thymus_c3,rna_Heart_c10
A2M	cluster_3	No	GO:0071310	BP	cellular response to organic substance	0.00428857	BCAS3,BMPR2,CD36,COLEC12,FCGR2B,MSN,PDK4,PLCG2	rna_Heart_c2,rna_Thymus_c3,rna_Heart_c10
A2M	cluster_3	No	GO:0071402	BP	cellular response to lipoprotein particle stimulus	0.000832291	CD36,CD9,ITGB1	rna_Heart_c2,rna_Thymus_c3,rna_Heart_c10
A2M	cluster_3	No	GO:0071404	BP	cellular response to low-density lipoprotein particle stimulus	0.00050057	CD36,CD9,ITGB1	rna_Heart_c2,rna_Thymus_c3,rna_Heart_c10
A2M	cluster_3	No	GO:0071702	BP	organic substance transport	0.0042022	APOE,ATP6AP1,BCAP31,CD36,CLTC,FABP5,HNRNPA2B1,SLC1A3	rna_Heart_c2,rna_Thymus_c3,rna_Heart_c10
A2M	cluster_3	No	GO:0071705	BP	nitrogen compound transport	0.00326074	APOE,ATP6AP1,BCAP31,CD36,CLTC,HNRNPA2B1,SLC1A3	rna_Heart_c2,rna_Thymus_c3,rna_Heart_c10
A2M	cluster_3	No	GO:0090066	BP	regulation of anatomical structure size	0.0197437	ARHGAP18,BMPR2,MSN,PRKCE	rna_Heart_c2,rna_Thymus_c3,rna_Heart_c10
A2M	cluster_3	No	GO:0097009	BP	energy homeostasis	0.0277441	CD36,METRNL	rna_Heart_c2,rna_Thymus_c3,rna_Heart_c10
A2M	cluster_3	No	GO:0097242	BP	amyloid-beta clearance	0.0440068	CD36,CLTC	rna_Heart_c2,rna_Thymus_c3,rna_Heart_c10
A2M	cluster_3	No	GO:0098771	BP	inorganic ion homeostasis	0.00368979	ATP6AP1,ATP6V0E1,BCAP31,CD36,PDK4,PLCG2,SLC40A1	rna_Heart_c2,rna_Thymus_c3,rna_Heart_c10
A2M	cluster_3	No	GO:0098916	BP	anterograde trans-synaptic signaling	0.026376	APOE,ERC1,RPS6KA3,SLC1A3	rna_Heart_c2,rna_Thymus_c3,rna_Heart_c10
A2M	cluster_3	No	GO:0099177	BP	regulation of trans-synaptic signaling	0.0297533	APOE,ERC1,FABP5,ITGB1	rna_Heart_c2,rna_Thymus_c3,rna_Heart_c10
A2M	cluster_3	No	GO:0099536	BP	synaptic signaling	0.0313178	APOE,ERC1,RPS6KA3,SLC1A3	rna_Heart_c2,rna_Thymus_c3,rna_Heart_c10
A2M	cluster_3	No	GO:0099537	BP	trans-synaptic signaling	0.0313178	APOE,ERC1,RPS6KA3,SLC1A3	rna_Heart_c2,rna_Thymus_c3,rna_Heart_c10
A2M	cluster_3	No	GO:0120162	BP	positive regulation of cold-induced thermogenesis	0.0324424	CD36,EPAS1,FABP5	rna_Heart_c2,rna_Thymus_c3,rna_Heart_c10
A2M	cluster_3	No	GO:0140253	BP	cell-cell fusion	0.0277441	CD9,ITGB1	rna_Heart_c2,rna_Thymus_c3,rna_Heart_c10
A2M	cluster_3	No	GO:0150104	BP	transport across blood-brain barrier	0.0205015	CD36,FABP5,SLC1A3	rna_Heart_c2,rna_Thymus_c3,rna_Heart_c10
A2M	cluster_3	No	GO:1900225	BP	regulation of NLRP3 inflammasome complex assembly	0.0205015	CD36,PLCG2	rna_Heart_c2,rna_Thymus_c3,rna_Heart_c10
A2M	cluster_3	No	GO:1900227	BP	positive regulation of NLRP3 inflammasome complex assembly	0.00392349	CD36,PLCG2	rna_Heart_c2,rna_Thymus_c3,rna_Heart_c10
A2M	cluster_3	No	GO:1901698	BP	response to nitrogen compound	0.0133088	CD36,CD9,COLEC12,FCGR2B,ITGB1	rna_Heart_c2,rna_Thymus_c3,rna_Heart_c10
A2M	cluster_3	No	GO:1901700	BP	response to oxygen-containing compound	0.0344147	APOE,CD36,FCGR2B,MSN,PDK4,RPS6KA3	rna_Heart_c2,rna_Thymus_c3,rna_Heart_c10
A2M	cluster_3	No	GO:1902533	BP	positive regulation of intracellular signal transduction	0.000271597	APOE,BCAP31,CD36,FCGR2B,GPNMB,ITGB1,NOTCH2,PLCG2,SH3RF3	rna_Heart_c2,rna_Thymus_c3,rna_Heart_c10
A2M	cluster_3	No	GO:1902950	BP	regulation of dendritic spine maintenance	0.0205015	APOE,FCGR2B	rna_Heart_c2,rna_Thymus_c3,rna_Heart_c10
A2M	cluster_3	No	GO:1903034	BP	regulation of response to wounding	0.00357554	APOE,CD9,ITGB1,PRKCE	rna_Heart_c2,rna_Thymus_c3,rna_Heart_c10
A2M	cluster_3	No	GO:1903050	BP	regulation of proteolysis involved in cellular protein catabolic process	0.0197437	APOE,BCAP31,SH3RF3	rna_Heart_c2,rna_Thymus_c3,rna_Heart_c10
A2M	cluster_3	No	GO:1903076	BP	regulation of protein localization to plasma membrane	0.00639866	CLTC,ITGB1,PRKCE	rna_Heart_c2,rna_Thymus_c3,rna_Heart_c10
A2M	cluster_3	No	GO:1903131	BP	mononuclear cell differentiation	0.0148161	FCGR2B,ITGB1,NOTCH2,PLCG2	rna_Heart_c2,rna_Thymus_c3,rna_Heart_c10
A2M	cluster_3	No	GO:1903362	BP	regulation of cellular protein catabolic process	0.00181024	APOE,BCAP31,MSN,SH3RF3	rna_Heart_c2,rna_Thymus_c3,rna_Heart_c10
A2M	cluster_3	No	GO:1903364	BP	positive regulation of cellular protein catabolic process	0.000832291	APOE,BCAP31,MSN,SH3RF3	rna_Heart_c2,rna_Thymus_c3,rna_Heart_c10
A2M	cluster_3	No	GO:1903426	BP	regulation of reactive oxygen species biosynthetic process	0.0205015	CD36,PLCG2	rna_Heart_c2,rna_Thymus_c3,rna_Heart_c10
A2M	cluster_3	No	GO:1903428	BP	positive regulation of reactive oxygen species biosynthetic process	0.00931192	CD36,PLCG2	rna_Heart_c2,rna_Thymus_c3,rna_Heart_c10
A2M	cluster_3	No	GO:1903829	BP	positive regulation of protein localization	0.000598376	BCAP31,BCAS3,ITGB1,MSN,PECAM1,PRKCE	rna_Heart_c2,rna_Thymus_c3,rna_Heart_c10
A2M	cluster_3	No	GO:1904356	BP	regulation of telomere maintenance via telomere lengthening	0.0344147	HNRNPA2B1,XRCC5	rna_Heart_c2,rna_Thymus_c3,rna_Heart_c10
A2M	cluster_3	No	GO:1904358	BP	positive regulation of telomere maintenance via telomere lengthening	0.0344147	HNRNPA2B1,XRCC5	rna_Heart_c2,rna_Thymus_c3,rna_Heart_c10
A2M	cluster_3	No	GO:1904375	BP	regulation of protein localization to cell periphery	0.00780429	CLTC,ITGB1,PRKCE	rna_Heart_c2,rna_Thymus_c3,rna_Heart_c10
A2M	cluster_3	No	GO:1905475	BP	regulation of protein localization to membrane	0.0277441	CLTC,ITGB1,PRKCE	rna_Heart_c2,rna_Thymus_c3,rna_Heart_c10
A2M	cluster_3	No	GO:1905898	BP	positive regulation of response to endoplasmic reticulum stress	0.0153936	BCAP31,FCGR2B	rna_Heart_c2,rna_Thymus_c3,rna_Heart_c10
A2M	cluster_3	No	GO:1990379	BP	lipid transport across blood-brain barrier	0.00392349	CD36,FABP5	rna_Heart_c2,rna_Thymus_c3,rna_Heart_c10
A2M	cluster_3	No	GO:2000112	BP	regulation of cellular macromolecule biosynthetic process	0.0327977	BMPR2,HNRNPA2B1,RPS6KA3,XRCC5	rna_Heart_c2,rna_Thymus_c3,rna_Heart_c10
A2M	cluster_3	No	GO:2000116	BP	regulation of cysteine-type endopeptidase activity	0.0440068	ASPH,BCAP31,RPS6KA3	rna_Heart_c2,rna_Thymus_c3,rna_Heart_c10
A2M	cluster_3	No	GO:2000145	BP	regulation of cell motility	9.87874e-05	APOE,ARHGAP18,BCAS3,BMPR2,GPNMB,ITGB1,MSN,PECAM1,PLCG2,PRKCE	rna_Heart_c2,rna_Thymus_c3,rna_Heart_c10
A2M	cluster_3	No	GO:2000147	BP	positive regulation of cell motility	0.00123354	BCAS3,BMPR2,GPNMB,ITGB1,PECAM1,PLCG2,PRKCE	rna_Heart_c2,rna_Thymus_c3,rna_Heart_c10
A2M	cluster_3	No	GO:2000209	BP	regulation of anoikis	0.0205015	ITGB1,PDK4	rna_Heart_c2,rna_Thymus_c3,rna_Heart_c10
A2M	cluster_3	No	GO:2000249	BP	regulation of actin cytoskeleton reorganization	0.0344147	BCAS3,NOTCH2	rna_Heart_c2,rna_Thymus_c3,rna_Heart_c10
A2M	cluster_3	No	GO:2000278	BP	regulation of DNA biosynthetic process	0.0141283	BMPR2,HNRNPA2B1,XRCC5	rna_Heart_c2,rna_Thymus_c3,rna_Heart_c10
A2M	cluster_3	No	GO:2000811	BP	negative regulation of anoikis	0.0205015	ITGB1,PDK4	rna_Heart_c2,rna_Thymus_c3,rna_Heart_c10
A2M	cluster_3	No	GO:2001252	BP	positive regulation of chromosome organization	0.0344147	HNRNPA2B1,XRCC5	rna_Heart_c2,rna_Thymus_c3,rna_Heart_c10
A2M	cluster_3	Yes	GO:0002831	BP	regulation of response to biotic stimulus	0.0206025	CD36,FCGR2B,PLCG2,XRCC5	rna_Heart_c2,rna_Thymus_c3,rna_Heart_c10
A2M	cluster_3	Yes	GO:0031347	BP	regulation of defense response	0.0278801	APOE,FCGR2B,METRNL,PLCG2,XRCC5	rna_Heart_c2,rna_Thymus_c3,rna_Heart_c10
A2M	cluster_3	Yes	GO:0032101	BP	regulation of response to external stimulus	0.0113995	APOE,CD36,CD9,FCGR2B,METRNL,PLCG2,XRCC5	rna_Heart_c2,rna_Thymus_c3,rna_Heart_c10
A2M	cluster_3	Yes	GO:0050776	BP	regulation of immune response	0.0157294	CD36,COLEC12,FCGR2B,PLCG2,PRKCE,RPS6KA3,XRCC5	rna_Heart_c2,rna_Thymus_c3,rna_Heart_c10
A2M	cluster_3	Yes	GO:0080134	BP	regulation of response to stress	0.000168485	APOE,BCAP31,CD9,FCGR2B,ITGB1,METRNL,PLCG2,PRKCE,SH3RF3,XRCC5	rna_Heart_c2,rna_Thymus_c3,rna_Heart_c10
A2M	cluster_4	No	GO:0007179	BP	transforming growth factor beta receptor signaling pathway	0.040155	COL1A2,COL3A1,TGFBR3	rna_Kidney_c10,rna_Lung_c14,rna_Lung_c16,rna_Heart_c9,rna_Large_Intestine_c24
A2M	cluster_4	No	GO:0007517	BP	muscle organ development	0.0321275	LAMA2,SOX6,TAGLN	rna_Kidney_c10,rna_Lung_c14,rna_Lung_c16,rna_Heart_c9,rna_Large_Intestine_c24
A2M	cluster_4	No	GO:0009653	BP	anatomical structure morphogenesis	0.00636078	COL1A2,COL4A1,CRISPLD2,ELN,LAMA2,MAP1B,PID1,SVEP1,TGFBR3	rna_Kidney_c10,rna_Lung_c14,rna_Lung_c16,rna_Heart_c9,rna_Large_Intestine_c24
A2M	cluster_4	No	GO:0030198	BP	extracellular matrix organization	0.000271979	ADAMTS2,COL1A2,COL3A1,COL4A1,COL4A2,COL8A1,SMOC2	rna_Kidney_c10,rna_Lung_c14,rna_Lung_c16,rna_Heart_c9,rna_Large_Intestine_c24
A2M	cluster_4	No	GO:0030199	BP	collagen fibril organization	0.0361777	ADAMTS2,COL1A2,COL3A1	rna_Kidney_c10,rna_Lung_c14,rna_Lung_c16,rna_Heart_c9,rna_Large_Intestine_c24
A2M	cluster_4	No	GO:0032330	BP	regulation of chondrocyte differentiation	0.00755582	SOX5,SOX6,ZBTB16	rna_Kidney_c10,rna_Lung_c14,rna_Lung_c16,rna_Heart_c9,rna_Large_Intestine_c24
A2M	cluster_4	No	GO:0032332	BP	positive regulation of chondrocyte differentiation	0.00153459	SOX5,SOX6,ZBTB16	rna_Kidney_c10,rna_Lung_c14,rna_Lung_c16,rna_Heart_c9,rna_Large_Intestine_c24
A2M	cluster_4	No	GO:0043062	BP	extracellular structure organization	0.000271979	ADAMTS2,COL1A2,COL3A1,COL4A1,COL4A2,COL8A1,SMOC2	rna_Kidney_c10,rna_Lung_c14,rna_Lung_c16,rna_Heart_c9,rna_Large_Intestine_c24
A2M	cluster_4	No	GO:0045229	BP	external encapsulating structure organization	0.000271979	ADAMTS2,COL1A2,COL3A1,COL4A1,COL4A2,COL8A1,SMOC2	rna_Kidney_c10,rna_Lung_c14,rna_Lung_c16,rna_Heart_c9,rna_Large_Intestine_c24
A2M	cluster_4	No	GO:0048513	BP	animal organ development	0.00478245	COL3A1,COL4A1,LAMA2,SOX5,SOX6,TAGLN,TGFBR3,ZBTB16	rna_Kidney_c10,rna_Lung_c14,rna_Lung_c16,rna_Heart_c9,rna_Large_Intestine_c24
A2M	cluster_4	No	GO:0051216	BP	cartilage development	0.00552339	SOX5,SOX6,ZBTB16	rna_Kidney_c10,rna_Lung_c14,rna_Lung_c16,rna_Heart_c9,rna_Large_Intestine_c24
A2M	cluster_4	No	GO:0061035	BP	regulation of cartilage development	0.0105241	SOX5,SOX6,ZBTB16	rna_Kidney_c10,rna_Lung_c14,rna_Lung_c16,rna_Heart_c9,rna_Large_Intestine_c24
A2M	cluster_4	No	GO:0061036	BP	positive regulation of cartilage development	0.00339275	SOX5,SOX6,ZBTB16	rna_Kidney_c10,rna_Lung_c14,rna_Lung_c16,rna_Heart_c9,rna_Large_Intestine_c24
A2M	cluster_4	No	GO:0061061	BP	muscle structure development	0.040155	LAMA2,SOX6,TAGLN	rna_Kidney_c10,rna_Lung_c14,rna_Lung_c16,rna_Heart_c9,rna_Large_Intestine_c24
A2M	cluster_4	No	GO:2000026	BP	regulation of multicellular organismal development	0.0321275	COL4A2,ITGB1,SMOC2,SOX5,SOX6,SPARC,TGFBR3,ZBTB16	rna_Kidney_c10,rna_Lung_c14,rna_Lung_c16,rna_Heart_c9,rna_Large_Intestine_c24
A2M	cluster_4	No	GO:2000739	BP	regulation of mesenchymal stem cell differentiation	0.0440764	SOX5,SOX6	rna_Kidney_c10,rna_Lung_c14,rna_Lung_c16,rna_Heart_c9,rna_Large_Intestine_c24
A2M	cluster_4	No	GO:2000741	BP	positive regulation of mesenchymal stem cell differentiation	0.0440764	SOX5,SOX6	rna_Kidney_c10,rna_Lung_c14,rna_Lung_c16,rna_Heart_c9,rna_Large_Intestine_c24
A2MP1	cluster_1	No	GO:0001775	BP	cell activation	0.0301316	DGKH,IL2RB,NCR1,SLAMF1,SLAMF6,TNF	rna_Liver_c2
A2MP1	cluster_1	No	GO:0001819	BP	positive regulation of cytokine production	0.0224301	CARD8,CRTAM,SLAMF1,SLAMF6,TBX21,TNF	rna_Liver_c2
A2MP1	cluster_1	No	GO:0002295	BP	T-helper cell lineage commitment	0.0329497	SLAMF6,TBX21	rna_Liver_c2
A2MP1	cluster_1	No	GO:0002697	BP	regulation of immune effector process	0.0289421	CRTAM,NCR1,SLAMF6,TBX21,TNF	rna_Liver_c2
A2MP1	cluster_1	No	GO:0002703	BP	regulation of leukocyte mediated immunity	0.0415448	CRTAM,NCR1,SLAMF6,TBX21	rna_Liver_c2
A2MP1	cluster_1	No	GO:0002706	BP	regulation of lymphocyte mediated immunity	0.0224301	CRTAM,NCR1,SLAMF6,TBX21	rna_Liver_c2
A2MP1	cluster_1	No	GO:0002708	BP	positive regulation of lymphocyte mediated immunity	0.0468016	CRTAM,SLAMF6,TBX21	rna_Liver_c2
A2MP1	cluster_1	No	GO:0002715	BP	regulation of natural killer cell mediated immunity	0.0070521	CRTAM,NCR1,SLAMF6	rna_Liver_c2
A2MP1	cluster_1	No	GO:0002717	BP	positive regulation of natural killer cell mediated immunity	0.0468016	CRTAM,SLAMF6	rna_Liver_c2
A2MP1	cluster_1	No	GO:0002831	BP	regulation of response to biotic stimulus	0.0157047	CARD8,CRTAM,NCR1,OASL,SLAMF6	rna_Liver_c2
A2MP1	cluster_1	No	GO:0009615	BP	response to virus	0.0170126	CARD8,OASL,SENP7,TBX21,TNF	rna_Liver_c2
A2MP1	cluster_1	No	GO:0019221	BP	cytokine-mediated signaling pathway	0.0468016	CCL4L1,IL18RAP,IL2RB,OASL,TNF	rna_Liver_c2
A2MP1	cluster_1	No	GO:0022604	BP	regulation of cell morphogenesis	0.0468016	ATP10A,BRWD1,CASS4,FMNL1	rna_Liver_c2
A2MP1	cluster_1	No	GO:0030866	BP	cortical actin cytoskeleton organization	0.0468016	FMNL1,TNF	rna_Liver_c2
A2MP1	cluster_1	No	GO:0032101	BP	regulation of response to external stimulus	0.0391209	CARD8,CRTAM,MFHAS1,NCR1,OASL,SLAMF6,TNF	rna_Liver_c2
A2MP1	cluster_1	No	GO:0032729	BP	positive regulation of interferon-gamma production	0.0415448	CRTAM,SLAMF1,SLAMF6	rna_Liver_c2
A2MP1	cluster_1	No	GO:0033138	BP	positive regulation of peptidyl-serine phosphorylation	0.0468016	LATS1,RPTOR,TNF	rna_Liver_c2
A2MP1	cluster_1	No	GO:0042269	BP	regulation of natural killer cell mediated cytotoxicity	0.0070521	CRTAM,NCR1,SLAMF6	rna_Liver_c2
A2MP1	cluster_1	No	GO:0045954	BP	positive regulation of natural killer cell mediated cytotoxicity	0.0468016	CRTAM,SLAMF6	rna_Liver_c2
A2MP1	cluster_1	No	GO:0050776	BP	regulation of immune response	0.0177795	CRTAM,MFHAS1,NCR1,OASL,SLAMF6,TBX21,TRAT1,TRDC	rna_Liver_c2
A2MP1	cluster_1	No	GO:0140374	BP	antiviral innate immune response	0.0329497	CARD8,SENP7	rna_Liver_c2
A2MP1	cluster_1	No	GO:1902533	BP	positive regulation of intracellular signal transduction	0.00172155	CASS4,CCL4L1,GPR174,MFHAS1,OASL,RPTOR,SLAMF1,TNF,TRAT1	rna_Liver_c2
A2MP1	cluster_2	No	GO:0006139	BP	nucleobase-containing compound metabolic process	0.0130231	BATF,GTF2B,MPHOSPH6,PURA,SRRT,UAP1,UCK2,UHRF1	rna_Lung_c27
A2MP1	cluster_2	No	GO:0006473	BP	protein acetylation	0.0342142	BRD1,GTF2B,NAA35	rna_Lung_c27
A2MP1	cluster_2	No	GO:0006491	BP	N-glycan processing	0.0426546	MAN1C1,ST8SIA1	rna_Lung_c27
A2MP1	cluster_2	No	GO:0006793	BP	phosphorus metabolic process	0.0236775	EIF2AK2,ITPKB,KIT,LATS1,MTMR6,OSBPL5,UAP1,UCK2	rna_Lung_c27
A2MP1	cluster_2	No	GO:0008104	BP	protein localization	0.0342142	ARCN1,ARL4A,CEP128,CEP83,CROCC,LINC00869,OPTN	rna_Lung_c27
A2MP1	cluster_2	No	GO:0033036	BP	macromolecule localization	0.0342863	ARCN1,ARL4A,CEP128,CEP83,CROCC,LINC00869,OPTN	rna_Lung_c27
A2MP1	cluster_2	No	GO:0043543	BP	protein acylation	0.0426546	BRD1,GTF2B,NAA35	rna_Lung_c27
A2MP1	cluster_2	No	GO:0048193	BP	Golgi vesicle transport	0.0155394	ARCN1,ERGIC2,OPTN,OSBPL5	rna_Lung_c27
A2MP1	cluster_2	No	GO:0051641	BP	cellular localization	0.00486649	ARCN1,ARL4A,CEP83,CROCC,ERGIC2,KIT,LINC00869,OPTN,OSBPL5	rna_Lung_c27
ABCB1	cluster_0	No	GO:0001817	BP	regulation of cytokine production	0.0100762	ANXA1,CLU,IL1R1,IL33,LTBP1,PLCG2,SULF1	rna_Lung_c17,rna_Large_Intestine_c12
ABCB1	cluster_0	No	GO:0001819	BP	positive regulation of cytokine production	0.0126779	ANXA1,CLU,IL1R1,IL33,PLCG2,SULF1	rna_Lung_c17,rna_Large_Intestine_c12
ABCB1	cluster_0	No	GO:0001936	BP	regulation of endothelial cell proliferation	0.0199279	CDH13,KDR,PPARG,SULF1	rna_Lung_c17,rna_Large_Intestine_c12
ABCB1	cluster_0	No	GO:0008285	BP	negative regulation of cell population proliferation	0.0161884	ADAMTS1,CDH13,IL33,PPARG,ROBO1,SULF1	rna_Lung_c17,rna_Large_Intestine_c12
ABCB1	cluster_0	No	GO:0009968	BP	negative regulation of signal transduction	0.0342187	CLU,LTBP1,PDE3A,PPARG,PTPRR,ROBO1,SULF1	rna_Lung_c17,rna_Large_Intestine_c12
ABCB1	cluster_0	No	GO:0010594	BP	regulation of endothelial cell migration	0.0187653	ADAMTS9,ANXA1,KDR,PPARG	rna_Lung_c17,rna_Large_Intestine_c12
ABCB1	cluster_0	No	GO:0010628	BP	positive regulation of gene expression	0.0100762	ANXA1,CLU,IL1R1,IL33,PLCG2,PPARG,ROBO1,SULF1	rna_Lung_c17,rna_Large_Intestine_c12
ABCB1	cluster_0	No	GO:0010631	BP	epithelial cell migration	0.0278944	CDH13,KDR,ROBO1	rna_Lung_c17,rna_Large_Intestine_c12
ABCB1	cluster_0	No	GO:0010632	BP	regulation of epithelial cell migration	0.0010141	ADAMTS9,ANXA1,KDR,PLCG2,PPARG,PTPRR	rna_Lung_c17,rna_Large_Intestine_c12
ABCB1	cluster_0	No	GO:0010633	BP	negative regulation of epithelial cell migration	0.0323775	ADAMTS9,PPARG,PTPRR	rna_Lung_c17,rna_Large_Intestine_c12
ABCB1	cluster_0	No	GO:0010648	BP	negative regulation of cell communication	0.0406557	CLU,LTBP1,PDE3A,PPARG,PTPRR,ROBO1,SULF1	rna_Lung_c17,rna_Large_Intestine_c12
ABCB1	cluster_0	No	GO:0010821	BP	regulation of mitochondrion organization	0.0323775	CLU,KDR,PPARG	rna_Lung_c17,rna_Large_Intestine_c12
ABCB1	cluster_0	No	GO:0016525	BP	negative regulation of angiogenesis	0.0098971	ADAMTS1,ADAMTS9,PPARG,SULF1	rna_Lung_c17,rna_Large_Intestine_c12
ABCB1	cluster_0	No	GO:0019932	BP	second-messenger-mediated signaling	0.036586	KDR,PDE3A,PDE7B,PLCG2	rna_Lung_c17,rna_Large_Intestine_c12
ABCB1	cluster_0	No	GO:0022603	BP	regulation of anatomical structure morphogenesis	0.00301137	ADAMTS1,ADAMTS9,ANXA1,EGLN1,KDR,PPARG,ROBO1,SULF1	rna_Lung_c17,rna_Large_Intestine_c12
ABCB1	cluster_0	No	GO:0023057	BP	negative regulation of signaling	0.0422595	CLU,LTBP1,PDE3A,PPARG,PTPRR,ROBO1,SULF1	rna_Lung_c17,rna_Large_Intestine_c12
ABCB1	cluster_0	No	GO:0030198	BP	extracellular matrix organization	0.00179513	ADAMTS1,ADAMTS9,HMCN1,POSTN,SULF1,TLL1	rna_Lung_c17,rna_Large_Intestine_c12
ABCB1	cluster_0	No	GO:0030334	BP	regulation of cell migration	5.26036e-05	ADAMTS1,ADAMTS9,ANXA1,CDH13,KDR,PLCG2,PLVAP,PPARG,PTPRR,ROBO1,SULF1	rna_Lung_c17,rna_Large_Intestine_c12
ABCB1	cluster_0	No	GO:0030335	BP	positive regulation of cell migration	0.0179195	ADAMTS1,ANXA1,CDH13,KDR,PLCG2,PLVAP	rna_Lung_c17,rna_Large_Intestine_c12
ABCB1	cluster_0	No	GO:0030336	BP	negative regulation of cell migration	0.0128356	ADAMTS9,PPARG,PTPRR,ROBO1,SULF1	rna_Lung_c17,rna_Large_Intestine_c12
ABCB1	cluster_0	No	GO:0032101	BP	regulation of response to external stimulus	0.00179513	ANXA1,CDH13,IL1R1,IL33,KDR,PLAT,PLCG2,PPARG,ROBO1	rna_Lung_c17,rna_Large_Intestine_c12
ABCB1	cluster_0	No	GO:0040012	BP	regulation of locomotion	2.54192e-05	ADAMTS1,ADAMTS9,ANXA1,CDH13,KDR,PLCG2,PLVAP,PPARG,PTPRR,ROBO1,SULF1,TACR1	rna_Lung_c17,rna_Large_Intestine_c12
ABCB1	cluster_0	No	GO:0040013	BP	negative regulation of locomotion	0.0199279	ADAMTS9,PPARG,PTPRR,ROBO1,SULF1	rna_Lung_c17,rna_Large_Intestine_c12
ABCB1	cluster_0	No	GO:0040017	BP	positive regulation of locomotion	0.00447288	ADAMTS1,ANXA1,CDH13,KDR,PLCG2,PLVAP,TACR1	rna_Lung_c17,rna_Large_Intestine_c12
ABCB1	cluster_0	No	GO:0043062	BP	extracellular structure organization	0.00179513	ADAMTS1,ADAMTS9,HMCN1,POSTN,SULF1,TLL1	rna_Lung_c17,rna_Large_Intestine_c12
ABCB1	cluster_0	No	GO:0043408	BP	regulation of MAPK cascade	0.0334547	KDR,PLCG2,PPARG,PTPRR,ROBO1,YWHAZ	rna_Lung_c17,rna_Large_Intestine_c12
ABCB1	cluster_0	No	GO:0043535	BP	regulation of blood vessel endothelial cell migration	0.0278944	ANXA1,KDR,PPARG	rna_Lung_c17,rna_Large_Intestine_c12
ABCB1	cluster_0	No	GO:0043542	BP	endothelial cell migration	0.0182818	CDH13,KDR,ROBO1	rna_Lung_c17,rna_Large_Intestine_c12
ABCB1	cluster_0	No	GO:0045229	BP	external encapsulating structure organization	0.00179513	ADAMTS1,ADAMTS9,HMCN1,POSTN,SULF1,TLL1	rna_Lung_c17,rna_Large_Intestine_c12
ABCB1	cluster_0	No	GO:0045765	BP	regulation of angiogenesis	0.00179513	ADAMTS1,ADAMTS9,EGLN1,KDR,PPARG,SULF1	rna_Lung_c17,rna_Large_Intestine_c12
ABCB1	cluster_0	No	GO:0050678	BP	regulation of epithelial cell proliferation	0.0128356	CDH13,KDR,PPARG,ROBO1,SULF1	rna_Lung_c17,rna_Large_Intestine_c12
ABCB1	cluster_0	No	GO:0050680	BP	negative regulation of epithelial cell proliferation	0.0418658	PPARG,ROBO1,SULF1	rna_Lung_c17,rna_Large_Intestine_c12
ABCB1	cluster_0	No	GO:0050727	BP	regulation of inflammatory response	0.0182818	ANXA1,IL1R1,IL33,PLCG2,PPARG	rna_Lung_c17,rna_Large_Intestine_c12
ABCB1	cluster_0	No	GO:0051241	BP	negative regulation of multicellular organismal process	0.00600938	ADAMTS1,ADAMTS9,ANXA1,PLAT,PPARG,PTPRR,ROBO1,SULF1	rna_Lung_c17,rna_Large_Intestine_c12
ABCB1	cluster_0	No	GO:0051270	BP	regulation of cellular component movement	2.54192e-05	ADAMTS1,ADAMTS9,ANXA1,CDH13,KDR,PLCG2,PLVAP,PPARG,PTPRR,ROBO1,SULF1,TACR1	rna_Lung_c17,rna_Large_Intestine_c12
ABCB1	cluster_0	No	GO:0051271	BP	negative regulation of cellular component movement	0.0179195	ADAMTS9,PPARG,PTPRR,ROBO1,SULF1	rna_Lung_c17,rna_Large_Intestine_c12
ABCB1	cluster_0	No	GO:0051272	BP	positive regulation of cellular component movement	0.00393182	ADAMTS1,ANXA1,CDH13,KDR,PLCG2,PLVAP,TACR1	rna_Lung_c17,rna_Large_Intestine_c12
ABCB1	cluster_0	No	GO:0090140	BP	regulation of mitochondrial fission	0.0200347	KDR,PPARG	rna_Lung_c17,rna_Large_Intestine_c12
ABCB1	cluster_0	No	GO:0090287	BP	regulation of cellular response to growth factor stimulus	0.0473848	LTBP1,PPARG,ROBO1,SULF1	rna_Lung_c17,rna_Large_Intestine_c12
ABCB1	cluster_0	No	GO:1901342	BP	regulation of vasculature development	0.00179513	ADAMTS1,ADAMTS9,EGLN1,KDR,PPARG,SULF1	rna_Lung_c17,rna_Large_Intestine_c12
ABCB1	cluster_0	No	GO:1901343	BP	negative regulation of vasculature development	0.00997389	ADAMTS1,ADAMTS9,PPARG,SULF1	rna_Lung_c17,rna_Large_Intestine_c12
ABCB1	cluster_0	No	GO:1901989	BP	positive regulation of cell cycle phase transition	0.0182818	ADAMTS1,ANXA1,PLCG2	rna_Lung_c17,rna_Large_Intestine_c12
ABCB1	cluster_0	No	GO:1902808	BP	positive regulation of cell cycle G1/S phase transition	0.00992074	ADAMTS1,ANXA1,PLCG2	rna_Lung_c17,rna_Large_Intestine_c12
ABCB1	cluster_0	No	GO:2000026	BP	regulation of multicellular organismal development	0.0142678	ADAMTS1,ADAMTS9,ANXA1,EGLN1,KDR,PPARG,ROBO1,SULF1	rna_Lung_c17,rna_Large_Intestine_c12
ABCB1	cluster_0	No	GO:2000145	BP	regulation of cell motility	2.54192e-05	ADAMTS1,ADAMTS9,ANXA1,CDH13,KDR,PLCG2,PLVAP,PPARG,PTPRR,ROBO1,SULF1,TACR1	rna_Lung_c17,rna_Large_Intestine_c12
ABCB1	cluster_0	No	GO:2000146	BP	negative regulation of cell motility	0.0142678	ADAMTS9,PPARG,PTPRR,ROBO1,SULF1	rna_Lung_c17,rna_Large_Intestine_c12
ABCB1	cluster_0	No	GO:2000147	BP	positive regulation of cell motility	0.00392905	ADAMTS1,ANXA1,CDH13,KDR,PLCG2,PLVAP,TACR1	rna_Lung_c17,rna_Large_Intestine_c12
ABCB1	cluster_0	No	GO:2000181	BP	negative regulation of blood vessel morphogenesis	0.00997389	ADAMTS1,ADAMTS9,PPARG,SULF1	rna_Lung_c17,rna_Large_Intestine_c12
ABCB1	cluster_0	No	GO:2000241	BP	regulation of reproductive process	0.00301137	PDE3A,PLAT,SULF1,TACR1	rna_Lung_c17,rna_Large_Intestine_c12
ABCB1	cluster_0	Yes	GO:0080134	BP	regulation of response to stress	0.0491703	ANXA1,CLU,IL1R1,IL33,PLAT,PLCG2,PPARG	rna_Lung_c17,rna_Large_Intestine_c12
ABCB1	cluster_3	No	GO:0001764	BP	neuron migration	0.0187911	FGF13,KIAA0319,MAP1B	rna_Large_Intestine_c20
ABCB1	cluster_3	No	GO:0006812	BP	cation transport	0.00266468	CACNA1B,CACNA1C,FGF13,KCNB2,KCNH7,KCNQ5,KCNT2,SLC5A7	rna_Large_Intestine_c20
ABCB1	cluster_3	No	GO:0006813	BP	potassium ion transport	0.0447623	KCNB2,KCNH7,KCNQ5,KCNT2	rna_Large_Intestine_c20
ABCB1	cluster_3	No	GO:0007154	BP	cell communication	0.000242094	CACNA1B,CACNA1C,FGF13,GPR176,GRIK2,IL1RAPL1,NLGN4X,PENK,SLC5A7,SNTG1	rna_Large_Intestine_c20
ABCB1	cluster_3	No	GO:0007267	BP	cell-cell signaling	0.00203924	CACNA1B,FGF13,GPR176,GRIK2,IL1RAPL1,NLGN4X,PENK,SLC5A7	rna_Large_Intestine_c20
ABCB1	cluster_3	No	GO:0007268	BP	chemical synaptic transmission	0.00201039	CACNA1B,GPR176,GRIK2,NLGN4X,PENK,SLC5A7	rna_Large_Intestine_c20
ABCB1	cluster_3	No	GO:0010975	BP	regulation of neuron projection development	0.00201039	CTNNA2,DPYSL3,FGF13,IL1RAPL1,KIAA0319,TOX	rna_Large_Intestine_c20
ABCB1	cluster_3	No	GO:0016477	BP	cell migration	0.0405028	CTNNA2,CTNNA3,FGF13,GPC6,KIAA0319,MAP1B,TGFBR3	rna_Large_Intestine_c20
ABCB1	cluster_3	No	GO:0021895	BP	cerebral cortex neuron differentiation	0.0400695	CHD5,TOX	rna_Large_Intestine_c20
ABCB1	cluster_3	No	GO:0023052	BP	signaling	0.000117074	CACNA1B,CACNA1C,CTNNA3,FGF13,GPR176,GRIK2,IL1RAPL1,NLGN4X,PENK,SLC5A7	rna_Large_Intestine_c20
ABCB1	cluster_3	No	GO:0030001	BP	metal ion transport	0.00752475	CACNA1B,CACNA1C,FGF13,KCNB2,KCNH7,KCNQ5,KCNT2	rna_Large_Intestine_c20
ABCB1	cluster_3	No	GO:0030182	BP	neuron differentiation	0.0447685	CHD5,IL1RAPL1,NLGN4X,TOX	rna_Large_Intestine_c20
ABCB1	cluster_3	No	GO:0031344	BP	regulation of cell projection organization	0.00752475	CTNNA2,DPYSL3,FGF13,IL1RAPL1,KIAA0319,TOX	rna_Large_Intestine_c20
ABCB1	cluster_3	No	GO:0032989	BP	cellular component morphogenesis	0.0232705	CTNNA2,CTNND2,MAP1B,NUBPL	rna_Large_Intestine_c20
ABCB1	cluster_3	No	GO:0032990	BP	cell part morphogenesis	0.0232705	CTNNA2,CTNND2,MAP1B,NUBPL	rna_Large_Intestine_c20
ABCB1	cluster_3	No	GO:0042391	BP	regulation of membrane potential	0.0447623	CACNA1C,CTNNA3,FGF13,KCNH7,NLGN4X	rna_Large_Intestine_c20
ABCB1	cluster_3	No	GO:0071805	BP	potassium ion transmembrane transport	0.0301179	KCNB2,KCNH7,KCNQ5,KCNT2	rna_Large_Intestine_c20
ABCB1	cluster_3	No	GO:0097105	BP	presynaptic membrane assembly	0.0400695	IL1RAPL1,NLGN4X	rna_Large_Intestine_c20
ABCB1	cluster_3	No	GO:0098609	BP	cell-cell adhesion	0.0447685	CTNNA2,CTNNA3,CTNND2,GPC6,IL1RAPL1,NLGN4X	rna_Large_Intestine_c20
ABCB1	cluster_3	No	GO:0098900	BP	regulation of action potential	0.0279408	CACNA1C,CTNNA3,FGF13	rna_Large_Intestine_c20
ABCB1	cluster_3	No	GO:0098901	BP	regulation of cardiac muscle cell action potential	0.00587675	CACNA1C,CTNNA3,FGF13	rna_Large_Intestine_c20
ABCB1	cluster_3	No	GO:0098916	BP	anterograde trans-synaptic signaling	0.00201039	CACNA1B,GPR176,GRIK2,NLGN4X,PENK,SLC5A7	rna_Large_Intestine_c20
ABCB1	cluster_3	No	GO:0099536	BP	synaptic signaling	0.000242094	CACNA1B,GPR176,GRIK2,IL1RAPL1,NLGN4X,PENK,SLC5A7	rna_Large_Intestine_c20
ABCB1	cluster_3	No	GO:0099537	BP	trans-synaptic signaling	0.000242094	CACNA1B,GPR176,GRIK2,IL1RAPL1,NLGN4X,PENK,SLC5A7	rna_Large_Intestine_c20
ABCB1	cluster_3	No	GO:0120035	BP	regulation of plasma membrane bounded cell projection organization	0.00752475	CTNNA2,DPYSL3,FGF13,IL1RAPL1,KIAA0319,TOX	rna_Large_Intestine_c20
ABCC1	cluster_0	No	GO:0002347	BP	response to tumor cell	0.0469551	DAPK1,NOTCH2	rna_Lung_c12,rna_Large_Intestine_c16
ABCC1	cluster_0	No	GO:0002685	BP	regulation of leukocyte migration	0.0401687	DAPK2,DOCK8,MSN,WASL	rna_Lung_c12,rna_Large_Intestine_c16
ABCC1	cluster_0	No	GO:0006793	BP	phosphorus metabolic process	0.0401687	DAPK1,DAPK2,NAMPT,PAPSS2,PIP4K2A,PITPNM2,PTPRA	rna_Lung_c12,rna_Large_Intestine_c16
ABCC1	cluster_0	No	GO:0006796	BP	phosphate-containing compound metabolic process	0.0401687	DAPK1,DAPK2,NAMPT,PAPSS2,PIP4K2A,PITPNM2,PTPRA	rna_Lung_c12,rna_Large_Intestine_c16
ABCC1	cluster_0	No	GO:0006915	BP	apoptotic process	0.0401687	BCL2,DAPK1,DAPK2,NOTCH2	rna_Lung_c12,rna_Large_Intestine_c16
ABCC1	cluster_0	No	GO:0009894	BP	regulation of catabolic process	0.00313229	BCL2,DAPK1,DAPK2,FEZ2,MSN,PIP4K2A,ZC3HAV1	rna_Lung_c12,rna_Large_Intestine_c16
ABCC1	cluster_0	No	GO:0010506	BP	regulation of autophagy	0.00313229	BCL2,DAPK1,DAPK2,FEZ2,PIP4K2A	rna_Lung_c12,rna_Large_Intestine_c16
ABCC1	cluster_0	No	GO:0016567	BP	protein ubiquitination	0.0412489	ARRB1,BCL2,PJA2,RNF38	rna_Lung_c12,rna_Large_Intestine_c16
ABCC1	cluster_0	No	GO:0030334	BP	regulation of cell migration	0.0374205	DAPK2,DOCK8,LIMCH1,MAPRE2,MSN,PPARG,WASL	rna_Lung_c12,rna_Large_Intestine_c16
ABCC1	cluster_0	No	GO:0030705	BP	cytoskeleton-dependent intracellular transport	0.0469551	DLG2,SPG11,WASL	rna_Lung_c12,rna_Large_Intestine_c16
ABCC1	cluster_0	No	GO:0031329	BP	regulation of cellular catabolic process	0.00159231	BCL2,DAPK1,DAPK2,FEZ2,MSN,PIP4K2A,ZC3HAV1	rna_Lung_c12,rna_Large_Intestine_c16
ABCC1	cluster_0	No	GO:0031331	BP	positive regulation of cellular catabolic process	0.0401687	DAPK1,MSN,PIP4K2A,ZC3HAV1	rna_Lung_c12,rna_Large_Intestine_c16
ABCC1	cluster_0	No	GO:0032943	BP	mononuclear cell proliferation	0.0148458	BCL2,DOCK8,MSN	rna_Lung_c12,rna_Large_Intestine_c16
ABCC1	cluster_0	No	GO:0033043	BP	regulation of organelle organization	0.0038252	FEZ2,LIMCH1,MAPRE2,MSN,NOTCH2,PID1,PIP4K2A,PPARG	rna_Lung_c12,rna_Large_Intestine_c16
ABCC1	cluster_0	No	GO:0034097	BP	response to cytokine	0.0292129	AFF3,BCL2,DAPK1,DOCK8,PID1	rna_Lung_c12,rna_Large_Intestine_c16
ABCC1	cluster_0	No	GO:0034135	BP	regulation of toll-like receptor 2 signaling pathway	0.0398835	MFHAS1,PJA2	rna_Lung_c12,rna_Large_Intestine_c16
ABCC1	cluster_0	No	GO:0034137	BP	positive regulation of toll-like receptor 2 signaling pathway	0.0259273	MFHAS1,PJA2	rna_Lung_c12,rna_Large_Intestine_c16
ABCC1	cluster_0	No	GO:0035556	BP	intracellular signal transduction	0.0399977	BCL2,CHRM3,DAPK1,DAPK2,PITPNM2,RAPGEF6,ZNF385B	rna_Lung_c12,rna_Large_Intestine_c16
ABCC1	cluster_0	No	GO:0040012	BP	regulation of locomotion	0.0401687	DAPK2,DOCK8,LIMCH1,MAPRE2,MSN,PPARG,WASL	rna_Lung_c12,rna_Large_Intestine_c16
ABCC1	cluster_0	No	GO:0042098	BP	T cell proliferation	0.0469551	DOCK8,MSN	rna_Lung_c12,rna_Large_Intestine_c16
ABCC1	cluster_0	No	GO:0044087	BP	regulation of cellular component biogenesis	0.0401687	FEZ2,LIMCH1,MSN,PIP4K2A,PTPRA,WASL	rna_Lung_c12,rna_Large_Intestine_c16
ABCC1	cluster_0	No	GO:0044088	BP	regulation of vacuole organization	0.0398835	FEZ2,PIP4K2A	rna_Lung_c12,rna_Large_Intestine_c16
ABCC1	cluster_0	No	GO:0046578	BP	regulation of Ras protein signal transduction	0.0401687	ARRB1,MAPRE2,NOTCH2	rna_Lung_c12,rna_Large_Intestine_c16
ABCC1	cluster_0	No	GO:0046579	BP	positive regulation of Ras protein signal transduction	0.0111608	ARRB1,MAPRE2,NOTCH2	rna_Lung_c12,rna_Large_Intestine_c16
ABCC1	cluster_0	No	GO:0046627	BP	negative regulation of insulin receptor signaling pathway	0.0398835	PID1,PIP4K2A	rna_Lung_c12,rna_Large_Intestine_c16
ABCC1	cluster_0	No	GO:0046651	BP	lymphocyte proliferation	0.0148458	BCL2,DOCK8,MSN	rna_Lung_c12,rna_Large_Intestine_c16
ABCC1	cluster_0	No	GO:0046907	BP	intracellular transport	0.0148458	CHM,DLG2,PIP4K2A,SPG11,VPS41,WASL	rna_Lung_c12,rna_Large_Intestine_c16
ABCC1	cluster_0	No	GO:0051056	BP	regulation of small GTPase mediated signal transduction	0.0312299	ARRB1,DOCK8,MAPRE2,NOTCH2	rna_Lung_c12,rna_Large_Intestine_c16
ABCC1	cluster_0	No	GO:0051057	BP	positive regulation of small GTPase mediated signal transduction	0.0148458	ARRB1,MAPRE2,NOTCH2	rna_Lung_c12,rna_Large_Intestine_c16
ABCC1	cluster_0	No	GO:0051270	BP	regulation of cellular component movement	0.0442533	DAPK2,DOCK8,LIMCH1,MAPRE2,MSN,PPARG,WASL	rna_Lung_c12,rna_Large_Intestine_c16
ABCC1	cluster_0	No	GO:0051345	BP	positive regulation of hydrolase activity	0.0135625	ASPH,DAPK1,DOCK8,MAPRE2,PPARG,RAPGEF6	rna_Lung_c12,rna_Large_Intestine_c16
ABCC1	cluster_0	No	GO:0051641	BP	cellular localization	0.0148458	CHM,DLG2,MAPRE2,PIP4K2A,RAPGEF6,SPG11,VPS41,WASL	rna_Lung_c12,rna_Large_Intestine_c16
ABCC1	cluster_0	No	GO:0051649	BP	establishment of localization in cell	0.0222659	ABCC4,CHM,DLG2,PIP4K2A,SPG11,VPS41,WASL	rna_Lung_c12,rna_Large_Intestine_c16
ABCC1	cluster_0	No	GO:0070661	BP	leukocyte proliferation	0.0221122	BCL2,DOCK8,MSN	rna_Lung_c12,rna_Large_Intestine_c16
ABCC1	cluster_0	No	GO:0090407	BP	organophosphate biosynthetic process	0.0412489	NAMPT,PAPSS2,PIP4K2A,PITPNM2	rna_Lung_c12,rna_Large_Intestine_c16
ABCC1	cluster_0	No	GO:0097190	BP	apoptotic signaling pathway	0.0425202	BCL2,DAPK1,ZNF385B	rna_Lung_c12,rna_Large_Intestine_c16
ABCC1	cluster_0	No	GO:0150116	BP	regulation of cell-substrate junction organization	0.0148458	LIMCH1,MAPRE2,PTPRA	rna_Lung_c12,rna_Large_Intestine_c16
ABCC1	cluster_0	No	GO:1900077	BP	negative regulation of cellular response to insulin stimulus	0.0398835	PID1,PIP4K2A	rna_Lung_c12,rna_Large_Intestine_c16
ABCC1	cluster_0	No	GO:1902115	BP	regulation of organelle assembly	0.0425202	FEZ2,MSN,PIP4K2A	rna_Lung_c12,rna_Large_Intestine_c16
ABCC1	cluster_0	No	GO:2000145	BP	regulation of cell motility	0.0398835	DAPK2,DOCK8,LIMCH1,MAPRE2,MSN,PPARG,WASL	rna_Lung_c12,rna_Large_Intestine_c16
ABCC1	cluster_0	No	GO:2000401	BP	regulation of lymphocyte migration	0.0401687	DOCK8,MSN,WASL	rna_Lung_c12,rna_Large_Intestine_c16
ABCC1	cluster_0	No	GO:2000785	BP	regulation of autophagosome assembly	0.0398835	FEZ2,PIP4K2A	rna_Lung_c12,rna_Large_Intestine_c16
ABCC1	cluster_0	No	GO:2001056	BP	positive regulation of cysteine-type endopeptidase activity	0.0399153	ASPH,DAPK1,PPARG	rna_Lung_c12,rna_Large_Intestine_c16
ABCC1	cluster_2	No	GO:0001775	BP	cell activation	0.0170914	CD28,DOCK8,IKZF1,LEF1,RGCC,RHOH	rna_Lymph_Node_c1,rna_Spleen_c0,rna_Lymph_Node_c3,rna_Lymph_Node_c8,rna_Lymph_Node_c17,rna_Thymus_c11
ABCC1	cluster_2	No	GO:0002521	BP	leukocyte differentiation	0.0473848	CD28,IKZF1,LEF1,RHOH	rna_Lymph_Node_c1,rna_Spleen_c0,rna_Lymph_Node_c3,rna_Lymph_Node_c8,rna_Lymph_Node_c17,rna_Thymus_c11
ABCC1	cluster_2	No	GO:0002694	BP	regulation of leukocyte activation	0.0453022	CD28,DOCK8,LEF1,PAG1,RHOH,SAMSN1	rna_Lymph_Node_c1,rna_Spleen_c0,rna_Lymph_Node_c3,rna_Lymph_Node_c8,rna_Lymph_Node_c17,rna_Thymus_c11
ABCC1	cluster_2	No	GO:0006473	BP	protein acetylation	4.3292e-06	EPC1,GTF2B,KANSL1,KAT6A,LEF1	rna_Lymph_Node_c1,rna_Spleen_c0,rna_Lymph_Node_c3,rna_Lymph_Node_c8,rna_Lymph_Node_c17,rna_Thymus_c11
ABCC1	cluster_2	No	GO:0006475	BP	internal protein amino acid acetylation	8.0757e-05	EPC1,KANSL1,KAT6A,LEF1	rna_Lymph_Node_c1,rna_Spleen_c0,rna_Lymph_Node_c3,rna_Lymph_Node_c8,rna_Lymph_Node_c17,rna_Thymus_c11
ABCC1	cluster_2	No	GO:0009890	BP	negative regulation of biosynthetic process	8.85392e-05	EPC1,IKZF1,KAT6A,KLF12,LEF1,RFX3,RPS6KA5,SCML4,SMARCA2,ZHX2	rna_Lymph_Node_c1,rna_Spleen_c0,rna_Lymph_Node_c3,rna_Lymph_Node_c8,rna_Lymph_Node_c17,rna_Thymus_c11
ABCC1	cluster_2	No	GO:0010558	BP	negative regulation of macromolecule biosynthetic process	5.71209e-05	EPC1,IKZF1,KAT6A,KLF12,LEF1,RFX3,RPS6KA5,SCML4,SMARCA2,ZHX2	rna_Lymph_Node_c1,rna_Spleen_c0,rna_Lymph_Node_c3,rna_Lymph_Node_c8,rna_Lymph_Node_c17,rna_Thymus_c11
ABCC1	cluster_2	No	GO:0010629	BP	negative regulation of gene expression	0.0215816	CD28,EPC1,LEF1,RGCC,RPS6KA5,TNRC6B	rna_Lymph_Node_c1,rna_Spleen_c0,rna_Lymph_Node_c3,rna_Lymph_Node_c8,rna_Lymph_Node_c17,rna_Thymus_c11
ABCC1	cluster_2	No	GO:0016570	BP	histone modification	0.000691766	EPC1,KANSL1,KAT6A,LEF1,RPS6KA5	rna_Lymph_Node_c1,rna_Spleen_c0,rna_Lymph_Node_c3,rna_Lymph_Node_c8,rna_Lymph_Node_c17,rna_Thymus_c11
ABCC1	cluster_2	No	GO:0016573	BP	histone acetylation	8.0757e-05	EPC1,KANSL1,KAT6A,LEF1	rna_Lymph_Node_c1,rna_Spleen_c0,rna_Lymph_Node_c3,rna_Lymph_Node_c8,rna_Lymph_Node_c17,rna_Thymus_c11
ABCC1	cluster_2	No	GO:0018205	BP	peptidyl-lysine modification	0.00466182	EPC1,KANSL1,KAT6A,LEF1	rna_Lymph_Node_c1,rna_Spleen_c0,rna_Lymph_Node_c3,rna_Lymph_Node_c8,rna_Lymph_Node_c17,rna_Thymus_c11
ABCC1	cluster_2	No	GO:0018393	BP	internal peptidyl-lysine acetylation	8.0757e-05	EPC1,KANSL1,KAT6A,LEF1	rna_Lymph_Node_c1,rna_Spleen_c0,rna_Lymph_Node_c3,rna_Lymph_Node_c8,rna_Lymph_Node_c17,rna_Thymus_c11
ABCC1	cluster_2	No	GO:0018394	BP	peptidyl-lysine acetylation	8.0757e-05	EPC1,KANSL1,KAT6A,LEF1	rna_Lymph_Node_c1,rna_Spleen_c0,rna_Lymph_Node_c3,rna_Lymph_Node_c8,rna_Lymph_Node_c17,rna_Thymus_c11
ABCC1	cluster_2	No	GO:0022407	BP	regulation of cell-cell adhesion	0.00070184	ANK3,CD28,DOCK8,LEF1,PAG1,RGCC,RHOH	rna_Lymph_Node_c1,rna_Spleen_c0,rna_Lymph_Node_c3,rna_Lymph_Node_c8,rna_Lymph_Node_c17,rna_Thymus_c11
ABCC1	cluster_2	No	GO:0022409	BP	positive regulation of cell-cell adhesion	0.0116135	ANK3,CD28,DOCK8,LEF1,RHOH	rna_Lymph_Node_c1,rna_Spleen_c0,rna_Lymph_Node_c3,rna_Lymph_Node_c8,rna_Lymph_Node_c17,rna_Thymus_c11
ABCC1	cluster_2	No	GO:0030098	BP	lymphocyte differentiation	0.0190488	CD28,IKZF1,LEF1,RHOH	rna_Lymph_Node_c1,rna_Spleen_c0,rna_Lymph_Node_c3,rna_Lymph_Node_c8,rna_Lymph_Node_c17,rna_Thymus_c11
ABCC1	cluster_2	No	GO:0030155	BP	regulation of cell adhesion	0.000870134	ANK3,CD28,DOCK8,LEF1,PAG1,PDE3B,RGCC,RHOH	rna_Lymph_Node_c1,rna_Spleen_c0,rna_Lymph_Node_c3,rna_Lymph_Node_c8,rna_Lymph_Node_c17,rna_Thymus_c11
ABCC1	cluster_2	No	GO:0031327	BP	negative regulation of cellular biosynthetic process	7.94727e-05	EPC1,IKZF1,KAT6A,KLF12,LEF1,RFX3,RPS6KA5,SCML4,SMARCA2,ZHX2	rna_Lymph_Node_c1,rna_Spleen_c0,rna_Lymph_Node_c3,rna_Lymph_Node_c8,rna_Lymph_Node_c17,rna_Thymus_c11
ABCC1	cluster_2	No	GO:0042110	BP	T cell activation	0.02429	CD28,DOCK8,LEF1,RHOH	rna_Lymph_Node_c1,rna_Spleen_c0,rna_Lymph_Node_c3,rna_Lymph_Node_c8,rna_Lymph_Node_c17,rna_Thymus_c11
ABCC1	cluster_2	No	GO:0043543	BP	protein acylation	9.74809e-06	EPC1,GTF2B,KANSL1,KAT6A,LEF1	rna_Lymph_Node_c1,rna_Spleen_c0,rna_Lymph_Node_c3,rna_Lymph_Node_c8,rna_Lymph_Node_c17,rna_Thymus_c11
ABCC1	cluster_2	No	GO:0043966	BP	histone H3 acetylation	0.0346357	KAT6A,LEF1	rna_Lymph_Node_c1,rna_Spleen_c0,rna_Lymph_Node_c3,rna_Lymph_Node_c8,rna_Lymph_Node_c17,rna_Thymus_c11
ABCC1	cluster_2	No	GO:0043967	BP	histone H4 acetylation	0.00179291	EPC1,KANSL1,LEF1	rna_Lymph_Node_c1,rna_Spleen_c0,rna_Lymph_Node_c3,rna_Lymph_Node_c8,rna_Lymph_Node_c17,rna_Thymus_c11
ABCC1	cluster_2	No	GO:0045785	BP	positive regulation of cell adhesion	0.0307524	ANK3,CD28,DOCK8,LEF1,RHOH	rna_Lymph_Node_c1,rna_Spleen_c0,rna_Lymph_Node_c3,rna_Lymph_Node_c8,rna_Lymph_Node_c17,rna_Thymus_c11
ABCC1	cluster_2	No	GO:0045892	BP	negative regulation of transcription, DNA-templated	1.94819e-05	EPC1,IKZF1,KAT6A,KLF12,LEF1,RFX3,RPS6KA5,SCML4,SMARCA2,ZHX2	rna_Lymph_Node_c1,rna_Spleen_c0,rna_Lymph_Node_c3,rna_Lymph_Node_c8,rna_Lymph_Node_c17,rna_Thymus_c11
ABCC1	cluster_2	No	GO:0045934	BP	negative regulation of nucleobase-containing compound metabolic process	5.71209e-05	EPC1,IKZF1,KAT6A,KLF12,LEF1,RFX3,RPS6KA5,SCML4,SMARCA2,ZHX2	rna_Lymph_Node_c1,rna_Spleen_c0,rna_Lymph_Node_c3,rna_Lymph_Node_c8,rna_Lymph_Node_c17,rna_Thymus_c11
ABCC1	cluster_2	No	GO:0045944	BP	positive regulation of transcription by RNA polymerase II	1.48724e-07	BCL11B,ELF1,EPC1,KAT6A,LEF1,NAMPT,NLRC5,RFX3,RGCC,RPS6KA5,SMARCA2,SSBP2	rna_Lymph_Node_c1,rna_Spleen_c0,rna_Lymph_Node_c3,rna_Lymph_Node_c8,rna_Lymph_Node_c17,rna_Thymus_c11
ABCC1	cluster_2	No	GO:0046649	BP	lymphocyte activation	0.0142962	CD28,DOCK8,IKZF1,LEF1,RHOH	rna_Lymph_Node_c1,rna_Spleen_c0,rna_Lymph_Node_c3,rna_Lymph_Node_c8,rna_Lymph_Node_c17,rna_Thymus_c11
ABCC1	cluster_2	No	GO:0050863	BP	regulation of T cell activation	0.0180826	CD28,DOCK8,LEF1,PAG1,RHOH	rna_Lymph_Node_c1,rna_Spleen_c0,rna_Lymph_Node_c3,rna_Lymph_Node_c8,rna_Lymph_Node_c17,rna_Thymus_c11
ABCC1	cluster_2	No	GO:0050870	BP	positive regulation of T cell activation	0.0387435	CD28,DOCK8,LEF1,RHOH	rna_Lymph_Node_c1,rna_Spleen_c0,rna_Lymph_Node_c3,rna_Lymph_Node_c8,rna_Lymph_Node_c17,rna_Thymus_c11
ABCC1	cluster_2	No	GO:0051249	BP	regulation of lymphocyte activation	0.0241275	CD28,DOCK8,LEF1,PAG1,RHOH,SAMSN1	rna_Lymph_Node_c1,rna_Spleen_c0,rna_Lymph_Node_c3,rna_Lymph_Node_c8,rna_Lymph_Node_c17,rna_Thymus_c11
ABCC1	cluster_2	No	GO:0051253	BP	negative regulation of RNA metabolic process	3.20799e-05	EPC1,IKZF1,KAT6A,KLF12,LEF1,RFX3,RPS6KA5,SCML4,SMARCA2,ZHX2	rna_Lymph_Node_c1,rna_Spleen_c0,rna_Lymph_Node_c3,rna_Lymph_Node_c8,rna_Lymph_Node_c17,rna_Thymus_c11
ABCC1	cluster_2	No	GO:0061014	BP	positive regulation of mRNA catabolic process	0.0346357	TNRC6B,ZC3HAV1	rna_Lymph_Node_c1,rna_Spleen_c0,rna_Lymph_Node_c3,rna_Lymph_Node_c8,rna_Lymph_Node_c17,rna_Thymus_c11
ABCC1	cluster_2	No	GO:1902679	BP	negative regulation of RNA biosynthetic process	2.02616e-05	EPC1,IKZF1,KAT6A,KLF12,LEF1,RFX3,RPS6KA5,SCML4,SMARCA2,ZHX2	rna_Lymph_Node_c1,rna_Spleen_c0,rna_Lymph_Node_c3,rna_Lymph_Node_c8,rna_Lymph_Node_c17,rna_Thymus_c11
ABCC1	cluster_2	No	GO:1903037	BP	regulation of leukocyte cell-cell adhesion	0.0190488	CD28,DOCK8,LEF1,PAG1,RHOH	rna_Lymph_Node_c1,rna_Spleen_c0,rna_Lymph_Node_c3,rna_Lymph_Node_c8,rna_Lymph_Node_c17,rna_Thymus_c11
ABCC1	cluster_2	No	GO:1903131	BP	mononuclear cell differentiation	0.0340371	CD28,IKZF1,LEF1,RHOH	rna_Lymph_Node_c1,rna_Spleen_c0,rna_Lymph_Node_c3,rna_Lymph_Node_c8,rna_Lymph_Node_c17,rna_Thymus_c11
ABCC1	cluster_2	No	GO:1903507	BP	negative regulation of nucleic acid-templated transcription	1.94819e-05	EPC1,IKZF1,KAT6A,KLF12,LEF1,RFX3,RPS6KA5,SCML4,SMARCA2,ZHX2	rna_Lymph_Node_c1,rna_Spleen_c0,rna_Lymph_Node_c3,rna_Lymph_Node_c8,rna_Lymph_Node_c17,rna_Thymus_c11
ABCC4	cluster_10	No	GO:0006508	BP	proteolysis	0.000158169	ARRB1,CPA6,ECE1,PCSK7,SENP7,SMURF2,TOM1L1,TRIM2,ZNRF1	rna_Large_Intestine_c4
ABCC4	cluster_10	No	GO:0006511	BP	ubiquitin-dependent protein catabolic process	0.00190882	ARRB1,SMURF2,TOM1L1,TRIM2,ZNRF1	rna_Large_Intestine_c4
ABCC4	cluster_10	No	GO:0009056	BP	catabolic process	0.00709342	ABCC1,ARRB1,ECE1,SMURF2,TOM1L1,TRIM2,VPS41,ZNRF1	rna_Large_Intestine_c4
ABCC4	cluster_10	No	GO:0009057	BP	macromolecule catabolic process	0.0261192	ARRB1,SMURF2,TOM1L1,TRIM2,ZNRF1	rna_Large_Intestine_c4
ABCC4	cluster_10	No	GO:0010243	BP	response to organonitrogen compound	0.0287455	ABCC1,CD9,CFTR,ITGB1,RPTOR	rna_Large_Intestine_c4
ABCC4	cluster_10	No	GO:0010498	BP	proteasomal protein catabolic process	0.0112622	ARRB1,SMURF2,TRIM2,ZNRF1	rna_Large_Intestine_c4
ABCC4	cluster_10	No	GO:0016567	BP	protein ubiquitination	0.0084331	ARRB1,PJA2,SMURF2,TRIM2,ZNRF1	rna_Large_Intestine_c4
ABCC4	cluster_10	No	GO:0019941	BP	modification-dependent protein catabolic process	0.00235486	ARRB1,SMURF2,TOM1L1,TRIM2,ZNRF1	rna_Large_Intestine_c4
ABCC4	cluster_10	No	GO:0030163	BP	protein catabolic process	0.0261192	ARRB1,SMURF2,TRIM2,ZNRF1	rna_Large_Intestine_c4
ABCC4	cluster_10	No	GO:0031623	BP	receptor internalization	0.0466236	ARRB1,CD9,ITGB1	rna_Large_Intestine_c4
ABCC4	cluster_10	No	GO:0032446	BP	protein modification by small protein conjugation	0.0120078	ARRB1,PJA2,SMURF2,TRIM2,ZNRF1	rna_Large_Intestine_c4
ABCC4	cluster_10	No	GO:0034111	BP	negative regulation of homotypic cell-cell adhesion	0.0287455	CD9,PRKG1	rna_Large_Intestine_c4
ABCC4	cluster_10	No	GO:0034135	BP	regulation of toll-like receptor 2 signaling pathway	0.0489405	MFHAS1,PJA2	rna_Large_Intestine_c4
ABCC4	cluster_10	No	GO:0034137	BP	positive regulation of toll-like receptor 2 signaling pathway	0.0287455	MFHAS1,PJA2	rna_Large_Intestine_c4
ABCC4	cluster_10	No	GO:0043087	BP	regulation of GTPase activity	0.04989	DOCK9,ITGB1,PRKG1,RAPGEF6	rna_Large_Intestine_c4
ABCC4	cluster_10	No	GO:0043161	BP	proteasome-mediated ubiquitin-dependent protein catabolic process	0.0112622	ARRB1,SMURF2,TRIM2,ZNRF1	rna_Large_Intestine_c4
ABCC4	cluster_10	No	GO:0043632	BP	modification-dependent macromolecule catabolic process	0.00235486	ARRB1,SMURF2,TOM1L1,TRIM2,ZNRF1	rna_Large_Intestine_c4
ABCC4	cluster_10	No	GO:0044248	BP	cellular catabolic process	0.00235486	ABCC1,ARRB1,ECE1,SMURF2,TOM1L1,TRIM2,VPS41,ZNRF1	rna_Large_Intestine_c4
ABCC4	cluster_10	No	GO:0044265	BP	cellular macromolecule catabolic process	0.0127036	ARRB1,SMURF2,TOM1L1,TRIM2,ZNRF1	rna_Large_Intestine_c4
ABCC4	cluster_10	No	GO:0051603	BP	proteolysis involved in cellular protein catabolic process	0.00616942	ARRB1,SMURF2,TOM1L1,TRIM2,ZNRF1	rna_Large_Intestine_c4
ABCC4	cluster_10	No	GO:0070647	BP	protein modification by small protein conjugation or removal	0.00235486	ARRB1,PJA2,SENP7,SMURF2,TRIM2,ZNRF1	rna_Large_Intestine_c4
ABCC4	cluster_10	No	GO:0090331	BP	negative regulation of platelet aggregation	0.0287455	CD9,PRKG1	rna_Large_Intestine_c4
ABCC4	cluster_10	No	GO:1901565	BP	organonitrogen compound catabolic process	0.00873392	ABCC1,ARRB1,ECE1,SMURF2,TRIM2,ZNRF1	rna_Large_Intestine_c4
ABCC4	cluster_10	No	GO:1901575	BP	organic substance catabolic process	0.011603	ABCC1,ARRB1,ECE1,SMURF2,TOM1L1,TRIM2,ZNRF1	rna_Large_Intestine_c4
ABCC4	cluster_10	No	GO:1901698	BP	response to nitrogen compound	0.0431858	ABCC1,CD9,CFTR,ITGB1,RPTOR	rna_Large_Intestine_c4
ABCC4	cluster_10	No	GO:1903522	BP	regulation of blood circulation	0.0489405	CACNB2,CELF2,CHRM3,ECE1	rna_Large_Intestine_c4
ABCC4	cluster_10	No	GO:1903961	BP	positive regulation of anion transmembrane transport	0.0287455	CFTR,ITGB1	rna_Large_Intestine_c4
ABCC4	cluster_10	Yes	GO:0030031	BP	cell projection assembly	0.0284188	CEP83,IQCB1,ITGB1,RAPGEF6	rna_Large_Intestine_c4
ABCC4	cluster_10	Yes	GO:0120031	BP	plasma membrane bounded cell projection assembly	0.0210713	CEP83,IQCB1,ITGB1,RAPGEF6	rna_Large_Intestine_c4
ABCC4	cluster_6	No	GO:0003007	BP	heart morphogenesis	0.0411298	INSR,TGFBR3	rna_Kidney_c6,rna_Kidney_c33
ABCC4	cluster_6	No	GO:0006468	BP	protein phosphorylation	0.00318019	BMPR2,DAPK1,INSR,PKN2,PRKCE,TGFBR3,TNKS	rna_Kidney_c6,rna_Kidney_c33
ABCC4	cluster_6	No	GO:0006793	BP	phosphorus metabolic process	0.00421454	BMPR2,DAPK1,INSR,PKN2,PPP2R5E,PRKCE,RPTOR,TGFBR3,TNKS	rna_Kidney_c6,rna_Kidney_c33
ABCC4	cluster_6	No	GO:0006796	BP	phosphate-containing compound metabolic process	0.00421454	BMPR2,DAPK1,INSR,PKN2,PPP2R5E,PRKCE,RPTOR,TGFBR3,TNKS	rna_Kidney_c6,rna_Kidney_c33
ABCC4	cluster_6	No	GO:0009719	BP	response to endogenous stimulus	0.00716171	BCAS3,BMPR2,INSR,NCOA1,RPTOR,TGFBR3,TRERF1	rna_Kidney_c6,rna_Kidney_c33
ABCC4	cluster_6	No	GO:0009725	BP	response to hormone	0.0138216	BCAS3,INSR,NCOA1,TGFBR3,TRERF1	rna_Kidney_c6,rna_Kidney_c33
ABCC4	cluster_6	No	GO:0009894	BP	regulation of catabolic process	0.0154188	DAPK1,INSR,RPTOR,SH3D19,TNRC6B,VPS13D	rna_Kidney_c6,rna_Kidney_c33
ABCC4	cluster_6	No	GO:0009896	BP	positive regulation of catabolic process	0.0138216	DAPK1,INSR,SH3D19,TNRC6B,VPS13D	rna_Kidney_c6,rna_Kidney_c33
ABCC4	cluster_6	No	GO:0009991	BP	response to extracellular stimulus	0.0163015	BCAS3,BMPR2,NCOA1,RPTOR	rna_Kidney_c6,rna_Kidney_c33
ABCC4	cluster_6	No	GO:0010564	BP	regulation of cell cycle process	0.034362	INSR,PKN2,PRKCE,RPTOR,TNKS	rna_Kidney_c6,rna_Kidney_c33
ABCC4	cluster_6	No	GO:0010638	BP	positive regulation of organelle organization	0.00476713	BCAS3,INSR,PRKCE,TNKS,VPS13D,XRCC5	rna_Kidney_c6,rna_Kidney_c33
ABCC4	cluster_6	No	GO:0016310	BP	phosphorylation	0.00125239	BMPR2,DAPK1,INSR,PKN2,PRKCE,RPTOR,TGFBR3,TNKS	rna_Kidney_c6,rna_Kidney_c33
ABCC4	cluster_6	No	GO:0031329	BP	regulation of cellular catabolic process	0.0113287	DAPK1,INSR,RPTOR,SH3D19,TNRC6B,VPS13D	rna_Kidney_c6,rna_Kidney_c33
ABCC4	cluster_6	No	GO:0031331	BP	positive regulation of cellular catabolic process	0.00865224	DAPK1,INSR,SH3D19,TNRC6B,VPS13D	rna_Kidney_c6,rna_Kidney_c33
ABCC4	cluster_6	No	GO:0031667	BP	response to nutrient levels	0.0160007	BCAS3,BMPR2,NCOA1,RPTOR	rna_Kidney_c6,rna_Kidney_c33
ABCC4	cluster_6	No	GO:0032870	BP	cellular response to hormone stimulus	0.0178313	BCAS3,INSR,NCOA1,TRERF1	rna_Kidney_c6,rna_Kidney_c33
ABCC4	cluster_6	No	GO:0033043	BP	regulation of organelle organization	0.0154188	ARFIP1,BCAS3,INSR,PRKCE,TNKS,VPS13D,XRCC5	rna_Kidney_c6,rna_Kidney_c33
ABCC4	cluster_6	No	GO:0042594	BP	response to starvation	0.0375996	BCAS3,BMPR2,RPTOR	rna_Kidney_c6,rna_Kidney_c33
ABCC4	cluster_6	No	GO:0043085	BP	positive regulation of catalytic activity	0.0131158	BCAS3,DAPK1,DOCK9,INSR,RPTOR,TBC1D22A,TNKS,XRCC5	rna_Kidney_c6,rna_Kidney_c33
ABCC4	cluster_6	No	GO:0045787	BP	positive regulation of cell cycle	0.0251872	INSR,PKN2,PRKCE,RPTOR	rna_Kidney_c6,rna_Kidney_c33
ABCC4	cluster_6	No	GO:0051053	BP	negative regulation of DNA metabolic process	0.0154188	BMPR2,TNKS,XRCC5	rna_Kidney_c6,rna_Kidney_c33
ABCC4	cluster_6	No	GO:0070198	BP	protein localization to chromosome, telomeric region	0.0236124	TNKS,XRCC5	rna_Kidney_c6,rna_Kidney_c33
ABCC4	cluster_6	No	GO:0071495	BP	cellular response to endogenous stimulus	0.0113287	BCAS3,BMPR2,INSR,NCOA1,RPTOR,TRERF1	rna_Kidney_c6,rna_Kidney_c33
ABCC4	cluster_6	No	GO:0090068	BP	positive regulation of cell cycle process	0.0163015	INSR,PKN2,PRKCE,RPTOR	rna_Kidney_c6,rna_Kidney_c33
ABCC4	cluster_6	No	GO:2000112	BP	regulation of cellular macromolecule biosynthetic process	0.00376977	BMPR2,DAPK1,INSR,TNKS,TNRC6B,XRCC5	rna_Kidney_c6,rna_Kidney_c33
ABCC4	cluster_6	No	GO:2000278	BP	regulation of DNA biosynthetic process	0.0375996	BMPR2,TNKS,XRCC5	rna_Kidney_c6,rna_Kidney_c33
ABHD1	cluster_10	No	GO:0017015	BP	regulation of transforming growth factor beta receptor signaling pathway	0.0104004	CAV1,LTBP1,PEG10,SMAD6	atac_Lung_c9,atac_Pancreas_c2
ABHD1	cluster_10	No	GO:0030512	BP	negative regulation of transforming growth factor beta receptor signaling pathway	0.00332829	CAV1,LTBP1,PEG10,SMAD6	atac_Lung_c9,atac_Pancreas_c2
ABHD1	cluster_10	No	GO:0033866	BP	nucleoside bisphosphate biosynthetic process	0.0472248	ACSL3,PPCDC	atac_Lung_c9,atac_Pancreas_c2
ABHD1	cluster_10	No	GO:0034030	BP	ribonucleoside bisphosphate biosynthetic process	0.0472248	ACSL3,PPCDC	atac_Lung_c9,atac_Pancreas_c2
ABHD1	cluster_10	No	GO:0034033	BP	purine nucleoside bisphosphate biosynthetic process	0.0472248	ACSL3,PPCDC	atac_Lung_c9,atac_Pancreas_c2
ABHD1	cluster_10	No	GO:0045185	BP	maintenance of protein location	0.0472248	CAV1,LTBP1,SRGN	atac_Lung_c9,atac_Pancreas_c2
ABHD1	cluster_10	No	GO:0090101	BP	negative regulation of transmembrane receptor protein serine/threonine kinase signaling pathway	0.0150318	CAV1,LTBP1,PEG10,SMAD6	atac_Lung_c9,atac_Pancreas_c2
ABHD1	cluster_10	No	GO:1903844	BP	regulation of cellular response to transforming growth factor beta stimulus	0.0115011	CAV1,LTBP1,PEG10,SMAD6	atac_Lung_c9,atac_Pancreas_c2
ABHD1	cluster_7	No	GO:0002181	BP	cytoplasmic translation	0.017831	RPL41,RPS27,UBA52	atac_Lung_c11,atac_Lung_c4,atac_Lung_c14,atac_Lung_c49,atac_Liver_c1,atac_Kidney_c28
ABHD1	cluster_7	No	GO:0006139	BP	nucleobase-containing compound metabolic process	0.0141723	HDAC10,NADSYN1,OAS3,PIAS4,POP1,RAD51AP1,RPS27,TARDBP	atac_Lung_c11,atac_Lung_c4,atac_Lung_c14,atac_Lung_c49,atac_Liver_c1,atac_Kidney_c28
ABHD1	cluster_7	No	GO:0006412	BP	translation	0.0349051	RPL41,RPS27,UBA52	atac_Lung_c11,atac_Lung_c4,atac_Lung_c14,atac_Lung_c49,atac_Liver_c1,atac_Kidney_c28
ABHD1	cluster_7	No	GO:0009890	BP	negative regulation of biosynthetic process	0.017831	FMR1,HDAC10,ID1,IMPACT,PIAS4,PRMT2,TARDBP,ZBTB16	atac_Lung_c11,atac_Lung_c4,atac_Lung_c14,atac_Lung_c49,atac_Liver_c1,atac_Kidney_c28
ABHD1	cluster_7	No	GO:0010558	BP	negative regulation of macromolecule biosynthetic process	0.0141723	FMR1,HDAC10,ID1,IMPACT,PIAS4,PRMT2,TARDBP,ZBTB16	atac_Lung_c11,atac_Lung_c4,atac_Lung_c14,atac_Lung_c49,atac_Liver_c1,atac_Kidney_c28
ABHD1	cluster_7	No	GO:0016236	BP	macroautophagy	0.037013	HDAC10,VTA1	atac_Lung_c11,atac_Lung_c4,atac_Lung_c14,atac_Lung_c49,atac_Liver_c1,atac_Kidney_c28
ABHD1	cluster_7	No	GO:0031327	BP	negative regulation of cellular biosynthetic process	0.0169003	FMR1,HDAC10,ID1,IMPACT,PIAS4,PRMT2,TARDBP,ZBTB16	atac_Lung_c11,atac_Lung_c4,atac_Lung_c14,atac_Lung_c49,atac_Liver_c1,atac_Kidney_c28
ABHD1	cluster_7	No	GO:0031401	BP	positive regulation of protein modification process	0.037013	AREG,FMR1,PIAS4,RGCC,SAP30BP,TBK1,THBS4	atac_Lung_c11,atac_Lung_c4,atac_Lung_c14,atac_Lung_c49,atac_Liver_c1,atac_Kidney_c28
ABHD1	cluster_7	No	GO:0032728	BP	positive regulation of interferon-beta production	0.037013	OAS3,TBK1	atac_Lung_c11,atac_Lung_c4,atac_Lung_c14,atac_Lung_c49,atac_Liver_c1,atac_Kidney_c28
ABHD1	cluster_7	No	GO:0045934	BP	negative regulation of nucleobase-containing compound metabolic process	0.0141723	FMR1,HDAC10,ID1,IMPACT,PIAS4,PRMT2,TARDBP,ZBTB16	atac_Lung_c11,atac_Lung_c4,atac_Lung_c14,atac_Lung_c49,atac_Liver_c1,atac_Kidney_c28
ABHD1	cluster_7	No	GO:0051253	BP	negative regulation of RNA metabolic process	0.0124256	FMR1,HDAC10,ID1,IMPACT,PIAS4,PRMT2,TARDBP,ZBTB16	atac_Lung_c11,atac_Lung_c4,atac_Lung_c14,atac_Lung_c49,atac_Liver_c1,atac_Kidney_c28
ABHD1	cluster_7	No	GO:0051851	BP	modulation by host of symbiont process	0.0349051	FMR1,SAP30BP,TARDBP	atac_Lung_c11,atac_Lung_c4,atac_Lung_c14,atac_Lung_c49,atac_Liver_c1,atac_Kidney_c28
ABHD1	cluster_7	No	GO:2001022	BP	positive regulation of response to DNA damage stimulus	0.0311397	FMR1,HDAC10,RAD51AP1	atac_Lung_c11,atac_Lung_c4,atac_Lung_c14,atac_Lung_c49,atac_Liver_c1,atac_Kidney_c28
ABI3BP	cluster_0	No	GO:0000086	BP	G2/M transition of mitotic cell cycle	0.00277589	ABCB1,FBXL7,LCMT1	rna_Kidney_c15,rna_Kidney_c12,rna_Kidney_c24
ABI3BP	cluster_0	No	GO:0007155	BP	cell adhesion	0.0210867	CD200,CNTN4,GPC6,MSN,NLGN1,NRP1,PCDH7,UBASH3B	rna_Kidney_c15,rna_Kidney_c12,rna_Kidney_c24
ABI3BP	cluster_0	No	GO:0022610	BP	biological adhesion	0.0210867	CD200,CNTN4,GPC6,MSN,NLGN1,NRP1,PCDH7,UBASH3B	rna_Kidney_c15,rna_Kidney_c12,rna_Kidney_c24
ABI3BP	cluster_0	No	GO:0034765	BP	regulation of ion transmembrane transport	0.039795	ABCB1,HOMER1,NLGN1,SLC8A1,UBASH3B	rna_Kidney_c15,rna_Kidney_c12,rna_Kidney_c24
ABI3BP	cluster_0	No	GO:0044087	BP	regulation of cellular component biogenesis	0.0210867	EPS8L2,GPC6,LCMT1,MSN,NLGN1,NRP1,TPM1	rna_Kidney_c15,rna_Kidney_c12,rna_Kidney_c24
ABI3BP	cluster_0	No	GO:0044770	BP	cell cycle phase transition	0.0281781	ABCB1,FBXL7,LCMT1	rna_Kidney_c15,rna_Kidney_c12,rna_Kidney_c24
ABI3BP	cluster_0	No	GO:0044772	BP	mitotic cell cycle phase transition	0.0222076	ABCB1,FBXL7,LCMT1	rna_Kidney_c15,rna_Kidney_c12,rna_Kidney_c24
ABI3BP	cluster_0	No	GO:0044839	BP	cell cycle G2/M phase transition	0.00277589	ABCB1,FBXL7,LCMT1	rna_Kidney_c15,rna_Kidney_c12,rna_Kidney_c24
ABI3BP	cluster_0	No	GO:0051262	BP	protein tetramerization	0.0210867	ALDH1A2,HOMER1,SHMT1	rna_Kidney_c15,rna_Kidney_c12,rna_Kidney_c24
ABI3BP	cluster_0	No	GO:1900029	BP	positive regulation of ruffle assembly	0.0210867	EPS8L2,NLGN1	rna_Kidney_c15,rna_Kidney_c12,rna_Kidney_c24
ABI3BP	cluster_5	No	GO:0001817	BP	regulation of cytokine production	0.033653	ANXA1,C3,CD34,CLU,FN1,LTBP1	rna_Lung_c24,rna_Large_Intestine_c21
ABI3BP	cluster_5	No	GO:0001960	BP	negative regulation of cytokine-mediated signaling pathway	0.0343282	PPARG,ROBO1,SLIT2	rna_Lung_c24,rna_Large_Intestine_c21
ABI3BP	cluster_5	No	GO:0002253	BP	activation of immune response	0.0412117	C3,C7,CFD,CLU,NFATC2	rna_Lung_c24,rna_Large_Intestine_c21
ABI3BP	cluster_5	No	GO:0003179	BP	heart valve morphogenesis	0.0235254	ELN,ROBO1,SLIT2	rna_Lung_c24,rna_Large_Intestine_c21
ABI3BP	cluster_5	No	GO:0003180	BP	aortic valve morphogenesis	0.00939554	ELN,ROBO1,SLIT2	rna_Lung_c24,rna_Large_Intestine_c21
ABI3BP	cluster_5	No	GO:0003184	BP	pulmonary valve morphogenesis	0.0486557	ROBO1,SLIT2	rna_Lung_c24,rna_Large_Intestine_c21
ABI3BP	cluster_5	No	GO:0006956	BP	complement activation	0.0398615	C3,C7,CFD,CLU	rna_Lung_c24,rna_Large_Intestine_c21
ABI3BP	cluster_5	No	GO:0007156	BP	homophilic cell adhesion via plasma membrane adhesion molecules	0.0486557	HMCN1,ITGB1,ROBO1	rna_Lung_c24,rna_Large_Intestine_c21
ABI3BP	cluster_5	No	GO:0007160	BP	cell-matrix adhesion	0.0373233	CD34,FN1,ITGB1	rna_Lung_c24,rna_Large_Intestine_c21
ABI3BP	cluster_5	No	GO:0009653	BP	anatomical structure morphogenesis	0.0115514	CACNA1C,CLU,EFEMP1,ELN,FN1,LAMA2,ROBO1,SLIT2	rna_Lung_c24,rna_Large_Intestine_c21
ABI3BP	cluster_5	No	GO:0009719	BP	response to endogenous stimulus	0.00557022	ANXA1,IGFBP5,ITGB1,PPARG,SLIT2,TIMP1,TIMP3	rna_Lung_c24,rna_Large_Intestine_c21
ABI3BP	cluster_5	No	GO:0009725	BP	response to hormone	0.00199546	ANXA1,IGFBP5,PPARG,SLIT2,TIMP1,TIMP3	rna_Lung_c24,rna_Large_Intestine_c21
ABI3BP	cluster_5	No	GO:0009894	BP	regulation of catabolic process	0.0486557	CLU,CST3,ITGB1,TIMP1,TIMP3	rna_Lung_c24,rna_Large_Intestine_c21
ABI3BP	cluster_5	No	GO:0009968	BP	negative regulation of signal transduction	0.0291056	CLU,IGFBP5,LTBP1,PPARG,ROBO1,SLIT2,TIMP3	rna_Lung_c24,rna_Large_Intestine_c21
ABI3BP	cluster_5	No	GO:0010243	BP	response to organonitrogen compound	0.0183652	ANXA1,IGFBP5,ITGB1,PPARG,SLIT2	rna_Lung_c24,rna_Large_Intestine_c21
ABI3BP	cluster_5	No	GO:0010628	BP	positive regulation of gene expression	0.00903716	ANXA1,C3,CD34,CLU,FN1,GSN,PPARG,ROBO1	rna_Lung_c24,rna_Large_Intestine_c21
ABI3BP	cluster_5	No	GO:0010629	BP	negative regulation of gene expression	0.0198551	ANXA1,CD34,FN1,IGFBP5,PPARG,ROBO1	rna_Lung_c24,rna_Large_Intestine_c21
ABI3BP	cluster_5	No	GO:0010639	BP	negative regulation of organelle organization	0.0206065	CLU,GSN,PPARG,SLIT2	rna_Lung_c24,rna_Large_Intestine_c21
ABI3BP	cluster_5	No	GO:0010648	BP	negative regulation of cell communication	0.0315289	CLU,IGFBP5,LTBP1,PPARG,ROBO1,SLIT2,TIMP3	rna_Lung_c24,rna_Large_Intestine_c21
ABI3BP	cluster_5	No	GO:0010710	BP	regulation of collagen catabolic process	0.00903716	CST3,ITGB1	rna_Lung_c24,rna_Large_Intestine_c21
ABI3BP	cluster_5	No	GO:0010942	BP	positive regulation of cell death	0.00199546	ANXA1,CLU,GSN,ITGB1,PPARG,SLIT2,TIMP3	rna_Lung_c24,rna_Large_Intestine_c21
ABI3BP	cluster_5	No	GO:0010950	BP	positive regulation of endopeptidase activity	0.0410986	GSN,PPARG,ROBO1	rna_Lung_c24,rna_Large_Intestine_c21
ABI3BP	cluster_5	No	GO:0010952	BP	positive regulation of peptidase activity	0.0486557	GSN,PPARG,ROBO1	rna_Lung_c24,rna_Large_Intestine_c21
ABI3BP	cluster_5	No	GO:0016477	BP	cell migration	0.0188643	ANXA1,CD34,FN1,ITGB1,NFATC2,ROBO1,SLIT2	rna_Lung_c24,rna_Large_Intestine_c21
ABI3BP	cluster_5	No	GO:0021836	BP	chemorepulsion involved in postnatal olfactory bulb interneuron migration	0.00903716	ROBO1,SLIT2	rna_Lung_c24,rna_Large_Intestine_c21
ABI3BP	cluster_5	No	GO:0022603	BP	regulation of anatomical structure morphogenesis	0.0118394	ANXA1,CD34,CST3,ITGB1,PPARG,ROBO1,SLIT2	rna_Lung_c24,rna_Large_Intestine_c21
ABI3BP	cluster_5	No	GO:0023057	BP	negative regulation of signaling	0.0323161	CLU,IGFBP5,LTBP1,PPARG,ROBO1,SLIT2,TIMP3	rna_Lung_c24,rna_Large_Intestine_c21
ABI3BP	cluster_5	No	GO:0030162	BP	regulation of proteolysis	0.00199546	CLU,CST3,GSN,PPARG,ROBO1,TIMP1,TIMP3	rna_Lung_c24,rna_Large_Intestine_c21
ABI3BP	cluster_5	No	GO:0030334	BP	regulation of cell migration	0.00822781	ANXA1,FN1,IGFBP5,ITGB1,PPARG,ROBO1,SLIT2,TIMP1	rna_Lung_c24,rna_Large_Intestine_c21
ABI3BP	cluster_5	No	GO:0030336	BP	negative regulation of cell migration	0.0114094	IGFBP5,PPARG,ROBO1,SLIT2,TIMP1	rna_Lung_c24,rna_Large_Intestine_c21
ABI3BP	cluster_5	No	GO:0030837	BP	negative regulation of actin filament polymerization	0.0486557	GSN,SLIT2	rna_Lung_c24,rna_Large_Intestine_c21
ABI3BP	cluster_5	No	GO:0031333	BP	negative regulation of protein-containing complex assembly	0.0459645	CLU,GSN,SLIT2	rna_Lung_c24,rna_Large_Intestine_c21
ABI3BP	cluster_5	No	GO:0032269	BP	negative regulation of cellular protein metabolic process	0.017634	CST3,IGFBP5,PPARG,SLIT2,TIMP1,TIMP3	rna_Lung_c24,rna_Large_Intestine_c21
ABI3BP	cluster_5	No	GO:0034104	BP	negative regulation of tissue remodeling	0.0296943	CST3,PPARG	rna_Lung_c24,rna_Large_Intestine_c21
ABI3BP	cluster_5	No	GO:0035385	BP	Roundabout signaling pathway	0.0183652	ROBO1,SLIT2	rna_Lung_c24,rna_Large_Intestine_c21
ABI3BP	cluster_5	No	GO:0035987	BP	endodermal cell differentiation	0.00903716	COL6A1,COL8A1,FN1	rna_Lung_c24,rna_Large_Intestine_c21
ABI3BP	cluster_5	No	GO:0040011	BP	locomotion	0.0315289	ANXA1,CD34,FN1,ITGB1,NFATC2,ROBO1,SLIT2	rna_Lung_c24,rna_Large_Intestine_c21
ABI3BP	cluster_5	No	GO:0040012	BP	regulation of locomotion	0.00928529	ANXA1,FN1,IGFBP5,ITGB1,PPARG,ROBO1,SLIT2,TIMP1	rna_Lung_c24,rna_Large_Intestine_c21
ABI3BP	cluster_5	No	GO:0040013	BP	negative regulation of locomotion	0.0183652	IGFBP5,PPARG,ROBO1,SLIT2,TIMP1	rna_Lung_c24,rna_Large_Intestine_c21
ABI3BP	cluster_5	No	GO:0042176	BP	regulation of protein catabolic process	0.0248954	CLU,CST3,TIMP1,TIMP3	rna_Lung_c24,rna_Large_Intestine_c21
ABI3BP	cluster_5	No	GO:0042177	BP	negative regulation of protein catabolic process	0.00203565	CST3,TIMP1,TIMP3	rna_Lung_c24,rna_Large_Intestine_c21
ABI3BP	cluster_5	No	GO:0042981	BP	regulation of apoptotic process	0.0327261	ANXA1,CLU,GSN,ITGB1,PPARG,SLIT2,TIMP3	rna_Lung_c24,rna_Large_Intestine_c21
ABI3BP	cluster_5	No	GO:0043010	BP	camera-type eye development	0.0373233	CACNA1C,EFEMP1	rna_Lung_c24,rna_Large_Intestine_c21
ABI3BP	cluster_5	No	GO:0043065	BP	positive regulation of apoptotic process	0.00100191	ANXA1,CLU,GSN,ITGB1,PPARG,SLIT2,TIMP3	rna_Lung_c24,rna_Large_Intestine_c21
ABI3BP	cluster_5	No	GO:0043067	BP	regulation of programmed cell death	0.0347842	ANXA1,CLU,GSN,ITGB1,PPARG,SLIT2,TIMP3	rna_Lung_c24,rna_Large_Intestine_c21
ABI3BP	cluster_5	No	GO:0043068	BP	positive regulation of programmed cell death	0.00100861	ANXA1,CLU,GSN,ITGB1,PPARG,SLIT2,TIMP3	rna_Lung_c24,rna_Large_Intestine_c21
ABI3BP	cluster_5	No	GO:0043086	BP	negative regulation of catalytic activity	0.031795	ANXA1,CST3,PPARG,TIMP1,TIMP3	rna_Lung_c24,rna_Large_Intestine_c21
ABI3BP	cluster_5	No	GO:0043280	BP	positive regulation of cysteine-type endopeptidase activity involved in apoptotic process	0.0207043	GSN,PPARG,ROBO1	rna_Lung_c24,rna_Large_Intestine_c21
ABI3BP	cluster_5	No	GO:0043281	BP	regulation of cysteine-type endopeptidase activity involved in apoptotic process	0.0486557	GSN,PPARG,ROBO1	rna_Lung_c24,rna_Large_Intestine_c21
ABI3BP	cluster_5	No	GO:0043434	BP	response to peptide hormone	0.0343282	ANXA1,IGFBP5,PPARG	rna_Lung_c24,rna_Large_Intestine_c21
ABI3BP	cluster_5	No	GO:0045862	BP	positive regulation of proteolysis	0.032051	CLU,GSN,PPARG,ROBO1	rna_Lung_c24,rna_Large_Intestine_c21
ABI3BP	cluster_5	No	GO:0048513	BP	animal organ development	0.00926022	ANXA1,CACNA1C,CD34,EFEMP1,FN1,LAMA2,PPARG	rna_Lung_c24,rna_Large_Intestine_c21
ABI3BP	cluster_5	No	GO:0048731	BP	system development	0.0207043	CACNA1C,FN1,GSN,LSAMP,MARCKS,ROBO1	rna_Lung_c24,rna_Large_Intestine_c21
ABI3BP	cluster_5	No	GO:0048870	BP	cell motility	0.0265763	ANXA1,CD34,FN1,ITGB1,NFATC2,ROBO1,SLIT2	rna_Lung_c24,rna_Large_Intestine_c21
ABI3BP	cluster_5	No	GO:0050776	BP	regulation of immune response	0.0301058	ANXA1,C3,C7,CFD,CLU,NFATC2,PPARG	rna_Lung_c24,rna_Large_Intestine_c21
ABI3BP	cluster_5	No	GO:0050778	BP	positive regulation of immune response	0.0327261	ANXA1,C3,C7,CFD,CLU,NFATC2	rna_Lung_c24,rna_Large_Intestine_c21
ABI3BP	cluster_5	No	GO:0050923	BP	regulation of negative chemotaxis	0.0183652	ROBO1,SLIT2	rna_Lung_c24,rna_Large_Intestine_c21
ABI3BP	cluster_5	No	GO:0051045	BP	negative regulation of membrane protein ectodomain proteolysis	0.00903716	TIMP1,TIMP3	rna_Lung_c24,rna_Large_Intestine_c21
ABI3BP	cluster_5	No	GO:0051129	BP	negative regulation of cellular component organization	0.0488757	CLU,CST3,GSN,PPARG,SLIT2	rna_Lung_c24,rna_Large_Intestine_c21
ABI3BP	cluster_5	No	GO:0051130	BP	positive regulation of cellular component organization	0.0486557	ANXA1,C3,CLU,GSN,ROBO1,SLIT2	rna_Lung_c24,rna_Large_Intestine_c21
ABI3BP	cluster_5	No	GO:0051241	BP	negative regulation of multicellular organismal process	0.00199546	ANXA1,CD34,CST3,EFEMP1,FN1,PPARG,ROBO1,SLIT2,TIMP1	rna_Lung_c24,rna_Large_Intestine_c21
ABI3BP	cluster_5	No	GO:0051248	BP	negative regulation of protein metabolic process	0.00557022	CLU,CST3,IGFBP5,PPARG,SLIT2,TIMP1,TIMP3	rna_Lung_c24,rna_Large_Intestine_c21
ABI3BP	cluster_5	No	GO:0051270	BP	regulation of cellular component movement	0.00346868	ANXA1,CACNA1C,FN1,IGFBP5,ITGB1,PPARG,ROBO1,SLIT2,TIMP1	rna_Lung_c24,rna_Large_Intestine_c21
ABI3BP	cluster_5	No	GO:0051271	BP	negative regulation of cellular component movement	0.0161335	IGFBP5,PPARG,ROBO1,SLIT2,TIMP1	rna_Lung_c24,rna_Large_Intestine_c21
ABI3BP	cluster_5	No	GO:0051336	BP	regulation of hydrolase activity	0.00346868	ANXA1,CST3,GSN,ITGB1,PPARG,ROBO1,TIMP1,TIMP3	rna_Lung_c24,rna_Large_Intestine_c21
ABI3BP	cluster_5	No	GO:0051346	BP	negative regulation of hydrolase activity	0.032051	ANXA1,CST3,TIMP1,TIMP3	rna_Lung_c24,rna_Large_Intestine_c21
ABI3BP	cluster_5	No	GO:0052547	BP	regulation of peptidase activity	0.00199546	CST3,GSN,PPARG,ROBO1,TIMP1,TIMP3	rna_Lung_c24,rna_Large_Intestine_c21
ABI3BP	cluster_5	No	GO:0052548	BP	regulation of endopeptidase activity	0.00755586	GSN,PPARG,ROBO1,TIMP1,TIMP3	rna_Lung_c24,rna_Large_Intestine_c21
ABI3BP	cluster_5	No	GO:0055094	BP	response to lipoprotein particle	0.0486557	ITGB1,PPARG	rna_Lung_c24,rna_Large_Intestine_c21
ABI3BP	cluster_5	No	GO:0060761	BP	negative regulation of response to cytokine stimulus	0.0343282	PPARG,ROBO1,SLIT2	rna_Lung_c24,rna_Large_Intestine_c21
ABI3BP	cluster_5	No	GO:0070099	BP	regulation of chemokine-mediated signaling pathway	0.0183652	ROBO1,SLIT2	rna_Lung_c24,rna_Large_Intestine_c21
ABI3BP	cluster_5	No	GO:0070100	BP	negative regulation of chemokine-mediated signaling pathway	0.0183652	ROBO1,SLIT2	rna_Lung_c24,rna_Large_Intestine_c21
ABI3BP	cluster_5	No	GO:0071402	BP	cellular response to lipoprotein particle stimulus	0.0486557	ITGB1,PPARG	rna_Lung_c24,rna_Large_Intestine_c21
ABI3BP	cluster_5	No	GO:0071404	BP	cellular response to low-density lipoprotein particle stimulus	0.0373233	ITGB1,PPARG	rna_Lung_c24,rna_Large_Intestine_c21
ABI3BP	cluster_5	No	GO:0071634	BP	regulation of transforming growth factor beta production	0.00601376	CD34,FN1,LTBP1	rna_Lung_c24,rna_Large_Intestine_c21
ABI3BP	cluster_5	No	GO:0090287	BP	regulation of cellular response to growth factor stimulus	0.0344617	LTBP1,PPARG,ROBO1,SLIT2	rna_Lung_c24,rna_Large_Intestine_c21
ABI3BP	cluster_5	No	GO:0090527	BP	actin filament reorganization	0.0183652	GSN,HMCN1	rna_Lung_c24,rna_Large_Intestine_c21
ABI3BP	cluster_5	No	GO:1901698	BP	response to nitrogen compound	0.0248954	ANXA1,IGFBP5,ITGB1,PPARG,SLIT2	rna_Lung_c24,rna_Large_Intestine_c21
ABI3BP	cluster_5	No	GO:1902904	BP	negative regulation of supramolecular fiber organization	0.0486557	CLU,GSN,SLIT2	rna_Lung_c24,rna_Large_Intestine_c21
ABI3BP	cluster_5	No	GO:1905048	BP	regulation of metallopeptidase activity	0.0373233	TIMP1,TIMP3	rna_Lung_c24,rna_Large_Intestine_c21
ABI3BP	cluster_5	No	GO:1905049	BP	negative regulation of metallopeptidase activity	0.0183652	TIMP1,TIMP3	rna_Lung_c24,rna_Large_Intestine_c21
ABI3BP	cluster_5	No	GO:2000026	BP	regulation of multicellular organismal development	0.0393099	ANXA1,CD34,EFEMP1,ITGB1,PPARG,ROBO1,SLIT2	rna_Lung_c24,rna_Large_Intestine_c21
ABI3BP	cluster_5	No	GO:2000145	BP	regulation of cell motility	0.00903716	ANXA1,FN1,IGFBP5,ITGB1,PPARG,ROBO1,SLIT2,TIMP1	rna_Lung_c24,rna_Large_Intestine_c21
ABI3BP	cluster_5	No	GO:2000146	BP	negative regulation of cell motility	0.0126322	IGFBP5,PPARG,ROBO1,SLIT2,TIMP1	rna_Lung_c24,rna_Large_Intestine_c21
ABI3BP	cluster_5	No	GO:2001056	BP	positive regulation of cysteine-type endopeptidase activity	0.0299365	GSN,PPARG,ROBO1	rna_Lung_c24,rna_Large_Intestine_c21
AC002451.3	cluster_11	No	GO:0000768	BP	syncytium formation by plasma membrane fusion	0.0231201	CD9,ITGB1	rna_Thymus_c8,rna_Thymus_c13
AC002451.3	cluster_11	No	GO:0001505	BP	regulation of neurotransmitter levels	0.0320413	ITGB1,SLC1A3,SYN3	rna_Thymus_c8,rna_Thymus_c13
AC002451.3	cluster_11	No	GO:0001666	BP	response to hypoxia	0.00248233	CAV1,EPAS1,PPARG,RGCC	rna_Thymus_c8,rna_Thymus_c13
AC002451.3	cluster_11	No	GO:0001933	BP	negative regulation of protein phosphorylation	0.0179921	APOE,CAV1,PID1,PPARG	rna_Thymus_c8,rna_Thymus_c13
AC002451.3	cluster_11	No	GO:0001936	BP	regulation of endothelial cell proliferation	0.000676939	APOE,CAV1,PPARG,RGCC,SPARC	rna_Thymus_c8,rna_Thymus_c13
AC002451.3	cluster_11	No	GO:0001937	BP	negative regulation of endothelial cell proliferation	6.30284e-06	APOE,CAV1,PPARG,RGCC,SPARC	rna_Thymus_c8,rna_Thymus_c13
AC002451.3	cluster_11	No	GO:0003013	BP	circulatory system process	0.0036455	CAV1,CD36,SLC1A3,SLC2A3,SLCO2B1	rna_Thymus_c8,rna_Thymus_c13
AC002451.3	cluster_11	No	GO:0003018	BP	vascular process in circulatory system	0.00165521	CAV1,CD36,SLC1A3,SLC2A3,SLCO2B1	rna_Thymus_c8,rna_Thymus_c13
AC002451.3	cluster_11	No	GO:0006082	BP	organic acid metabolic process	0.0110116	CD36,LPL,MGST3,PPARG,SLC2A3	rna_Thymus_c8,rna_Thymus_c13
AC002451.3	cluster_11	No	GO:0006469	BP	negative regulation of protein kinase activity	0.0376808	APOE,CAV1,PPARG	rna_Thymus_c8,rna_Thymus_c13
AC002451.3	cluster_11	No	GO:0006629	BP	lipid metabolic process	0.000395125	APOC1,APOE,CAV1,CD36,LPL,MGST3,PPARG,PRDX6	rna_Thymus_c8,rna_Thymus_c13
AC002451.3	cluster_11	No	GO:0006638	BP	neutral lipid metabolic process	0.000259347	APOC1,APOE,CAV1,LPL	rna_Thymus_c8,rna_Thymus_c13
AC002451.3	cluster_11	No	GO:0006639	BP	acylglycerol metabolic process	0.000259347	APOC1,APOE,CAV1,LPL	rna_Thymus_c8,rna_Thymus_c13
AC002451.3	cluster_11	No	GO:0006641	BP	triglyceride metabolic process	6.29722e-05	APOC1,APOE,CAV1,LPL	rna_Thymus_c8,rna_Thymus_c13
AC002451.3	cluster_11	No	GO:0006820	BP	anion transport	0.0080512	CD36,CLIC1,SLC1A3,SLC2A3,SLCO2B1	rna_Thymus_c8,rna_Thymus_c13
AC002451.3	cluster_11	No	GO:0006869	BP	lipid transport	3.14075e-06	APOC1,APOE,CAV1,CD36,MSR1,PPARG,RBP7,SLCO2B1	rna_Thymus_c8,rna_Thymus_c13
AC002451.3	cluster_11	No	GO:0006897	BP	endocytosis	2.825e-06	APOE,CAV1,CD36,CD9,CTSL,ITGB1,MSR1,MYO1E	rna_Thymus_c8,rna_Thymus_c13
AC002451.3	cluster_11	No	GO:0006898	BP	receptor-mediated endocytosis	3.94267e-06	APOE,CAV1,CD36,CD9,CTSL,ITGB1,MSR1	rna_Thymus_c8,rna_Thymus_c13
AC002451.3	cluster_11	No	GO:0006949	BP	syncytium formation	0.0231201	CD9,ITGB1	rna_Thymus_c8,rna_Thymus_c13
AC002451.3	cluster_11	No	GO:0007010	BP	cytoskeleton organization	0.0058387	APOE,ARHGAP10,DLC1,ITGB1,MAP1B,TUBA1B	rna_Thymus_c8,rna_Thymus_c13
AC002451.3	cluster_11	No	GO:0007015	BP	actin filament organization	0.0093633	CALD1,GSN,MARCKS,MYO1E	rna_Thymus_c8,rna_Thymus_c13
AC002451.3	cluster_11	No	GO:0007162	BP	negative regulation of cell adhesion	0.0289548	CD9,DLC1,GPNMB,RGCC	rna_Thymus_c8,rna_Thymus_c13
AC002451.3	cluster_11	No	GO:0007263	BP	nitric oxide mediated signal transduction	0.0167955	APOE,CD36	rna_Thymus_c8,rna_Thymus_c13
AC002451.3	cluster_11	No	GO:0007417	BP	central nervous system development	0.0247852	GSN,MARCKS,VCAN	rna_Thymus_c8,rna_Thymus_c13
AC002451.3	cluster_11	No	GO:0007520	BP	myoblast fusion	0.0231201	CD9,ITGB1	rna_Thymus_c8,rna_Thymus_c13
AC002451.3	cluster_11	No	GO:0007584	BP	response to nutrient	0.0298865	LPL,PPARG	rna_Thymus_c8,rna_Thymus_c13
AC002451.3	cluster_11	No	GO:0008285	BP	negative regulation of cell population proliferation	0.000813576	APOE,CAV1,DLC1,GPNMB,PPARG,RGCC,SPARC	rna_Thymus_c8,rna_Thymus_c13
AC002451.3	cluster_11	No	GO:0009056	BP	catabolic process	0.030168	APOE,CD36,CTSL,LPL,PRDX6,SLCO2B1	rna_Thymus_c8,rna_Thymus_c13
AC002451.3	cluster_11	No	GO:0009628	BP	response to abiotic stimulus	0.00429302	CAV1,EPAS1,GSN,PPARG,RGCC,TIMP1	rna_Thymus_c8,rna_Thymus_c13
AC002451.3	cluster_11	No	GO:0009719	BP	response to endogenous stimulus	0.00140557	CAV1,CD36,CD9,CTSL,ITGB1,PPARG,TIMP1	rna_Thymus_c8,rna_Thymus_c13
AC002451.3	cluster_11	No	GO:0009725	BP	response to hormone	0.0234814	CAV1,CTSL,PPARG,TIMP1	rna_Thymus_c8,rna_Thymus_c13
AC002451.3	cluster_11	No	GO:0009890	BP	negative regulation of biosynthetic process	0.0472534	APOC1,APOE,CAV1,ID3,PID1,PPARG	rna_Thymus_c8,rna_Thymus_c13
AC002451.3	cluster_11	No	GO:0009894	BP	regulation of catabolic process	8.97798e-05	APOC1,APOE,BCAP31,CAV1,CST3,ITGB1,MSN,TIMP1	rna_Thymus_c8,rna_Thymus_c13
AC002451.3	cluster_11	No	GO:0009895	BP	negative regulation of catabolic process	0.0405928	APOC1,CST3,TIMP1	rna_Thymus_c8,rna_Thymus_c13
AC002451.3	cluster_11	No	GO:0009896	BP	positive regulation of catabolic process	0.0234814	APOE,BCAP31,CAV1,MSN	rna_Thymus_c8,rna_Thymus_c13
AC002451.3	cluster_11	No	GO:0009991	BP	response to extracellular stimulus	0.0452729	APOE,LPL,PPARG	rna_Thymus_c8,rna_Thymus_c13
AC002451.3	cluster_11	No	GO:0010232	BP	vascular transport	0.00131905	CD36,SLC1A3,SLC2A3,SLCO2B1	rna_Thymus_c8,rna_Thymus_c13
AC002451.3	cluster_11	No	GO:0010243	BP	response to organonitrogen compound	0.00645021	CAV1,CD36,CD9,ITGB1,PPARG	rna_Thymus_c8,rna_Thymus_c13
AC002451.3	cluster_11	No	GO:0010544	BP	negative regulation of platelet activation	0.0167955	APOE,CD9	rna_Thymus_c8,rna_Thymus_c13
AC002451.3	cluster_11	No	GO:0010562	BP	positive regulation of phosphorus metabolic process	0.0309393	CAV1,DLC1,GPNMB,PID1,PPARG,RGCC	rna_Thymus_c8,rna_Thymus_c13
AC002451.3	cluster_11	No	GO:0010563	BP	negative regulation of phosphorus metabolic process	0.00449025	APOC1,APOE,CAV1,PID1,PPARG	rna_Thymus_c8,rna_Thymus_c13
AC002451.3	cluster_11	No	GO:0010565	BP	regulation of cellular ketone metabolic process	0.0185407	APOC1,CAV1,PPARG	rna_Thymus_c8,rna_Thymus_c13
AC002451.3	cluster_11	No	GO:0010594	BP	regulation of endothelial cell migration	0.00606859	APOE,PPARG,RGCC,SPARC	rna_Thymus_c8,rna_Thymus_c13
AC002451.3	cluster_11	No	GO:0010596	BP	negative regulation of endothelial cell migration	0.00570637	APOE,PPARG,RGCC	rna_Thymus_c8,rna_Thymus_c13
AC002451.3	cluster_11	No	GO:0010628	BP	positive regulation of gene expression	0.00292914	CD36,GSN,LPL,MSN,PID1,PPARG,PRDX6,RGCC	rna_Thymus_c8,rna_Thymus_c13
AC002451.3	cluster_11	No	GO:0010629	BP	negative regulation of gene expression	0.0382447	APOE,GPNMB,MSR1,PPARG,RGCC	rna_Thymus_c8,rna_Thymus_c13
AC002451.3	cluster_11	No	GO:0010632	BP	regulation of epithelial cell migration	0.0142829	APOE,PPARG,RGCC,SPARC	rna_Thymus_c8,rna_Thymus_c13
AC002451.3	cluster_11	No	GO:0010633	BP	negative regulation of epithelial cell migration	0.0102695	APOE,PPARG,RGCC	rna_Thymus_c8,rna_Thymus_c13
AC002451.3	cluster_11	No	GO:0010710	BP	regulation of collagen catabolic process	0.00292914	CST3,ITGB1	rna_Thymus_c8,rna_Thymus_c13
AC002451.3	cluster_11	No	GO:0010712	BP	regulation of collagen metabolic process	0.00104734	CST3,ITGB1,RGCC	rna_Thymus_c8,rna_Thymus_c13
AC002451.3	cluster_11	No	GO:0010743	BP	regulation of macrophage derived foam cell differentiation	0.000259347	CD36,LPL,MSR1,PPARG	rna_Thymus_c8,rna_Thymus_c13
AC002451.3	cluster_11	No	GO:0010744	BP	positive regulation of macrophage derived foam cell differentiation	0.00148332	CD36,LPL,MSR1	rna_Thymus_c8,rna_Thymus_c13
AC002451.3	cluster_11	No	GO:0010872	BP	regulation of cholesterol esterification	0.0110116	APOC1,APOE	rna_Thymus_c8,rna_Thymus_c13
AC002451.3	cluster_11	No	GO:0010873	BP	positive regulation of cholesterol esterification	0.0110116	APOC1,APOE	rna_Thymus_c8,rna_Thymus_c13
AC002451.3	cluster_11	No	GO:0010874	BP	regulation of cholesterol efflux	0.00148332	APOE,CAV1,PPARG	rna_Thymus_c8,rna_Thymus_c13
AC002451.3	cluster_11	No	GO:0010875	BP	positive regulation of cholesterol efflux	0.00104734	APOE,CAV1,PPARG	rna_Thymus_c8,rna_Thymus_c13
AC002451.3	cluster_11	No	GO:0010883	BP	regulation of lipid storage	0.00570637	LPL,MSR1,PPARG	rna_Thymus_c8,rna_Thymus_c13
AC002451.3	cluster_11	No	GO:0010884	BP	positive regulation of lipid storage	0.0376808	LPL,MSR1	rna_Thymus_c8,rna_Thymus_c13
AC002451.3	cluster_11	No	GO:0010885	BP	regulation of cholesterol storage	0.000376973	LPL,MSR1,PPARG	rna_Thymus_c8,rna_Thymus_c13
AC002451.3	cluster_11	No	GO:0010886	BP	positive regulation of cholesterol storage	0.00645021	LPL,MSR1	rna_Thymus_c8,rna_Thymus_c13
AC002451.3	cluster_11	No	GO:0010889	BP	regulation of sequestering of triglyceride	0.0231201	LPL,PPARG	rna_Thymus_c8,rna_Thymus_c13
AC002451.3	cluster_11	No	GO:0010942	BP	positive regulation of cell death	4.09504e-05	BCAP31,CAV1,CD36,DLC1,GSN,ITGB1,PPARG,RGCC	rna_Thymus_c8,rna_Thymus_c13
AC002451.3	cluster_11	No	GO:0010950	BP	positive regulation of endopeptidase activity	0.00148332	BCAP31,DLC1,GSN,PPARG	rna_Thymus_c8,rna_Thymus_c13
AC002451.3	cluster_11	No	GO:0010952	BP	positive regulation of peptidase activity	0.00196649	BCAP31,DLC1,GSN,PPARG	rna_Thymus_c8,rna_Thymus_c13
AC002451.3	cluster_11	No	GO:0015031	BP	protein transport	0.0472534	APOE,BCAP31,CD36,PPARG	rna_Thymus_c8,rna_Thymus_c13
AC002451.3	cluster_11	No	GO:0015711	BP	organic anion transport	0.0168925	CD36,SLC1A3,SLC2A3,SLCO2B1	rna_Thymus_c8,rna_Thymus_c13
AC002451.3	cluster_11	No	GO:0015849	BP	organic acid transport	0.000178917	APOE,CD36,PPARG,RBP7,SLC1A3,SLCO2B1	rna_Thymus_c8,rna_Thymus_c13
AC002451.3	cluster_11	No	GO:0015850	BP	organic hydroxy compound transport	2.3578e-05	APOC1,APOE,CAV1,CD36,MSR1,SLCO2B1	rna_Thymus_c8,rna_Thymus_c13
AC002451.3	cluster_11	No	GO:0015908	BP	fatty acid transport	0.000556243	APOE,CD36,PPARG,RBP7	rna_Thymus_c8,rna_Thymus_c13
AC002451.3	cluster_11	No	GO:0015909	BP	long-chain fatty acid transport	0.00317252	APOE,CD36,PPARG	rna_Thymus_c8,rna_Thymus_c13
AC002451.3	cluster_11	No	GO:0015918	BP	sterol transport	2.3578e-05	APOC1,APOE,CAV1,CD36,MSR1	rna_Thymus_c8,rna_Thymus_c13
AC002451.3	cluster_11	No	GO:0016032	BP	viral process	0.00748275	APOE,CAV1,CTSL	rna_Thymus_c8,rna_Thymus_c13
AC002451.3	cluster_11	No	GO:0016042	BP	lipid catabolic process	0.0185407	APOE,LPL,PRDX6	rna_Thymus_c8,rna_Thymus_c13
AC002451.3	cluster_11	No	GO:0016192	BP	vesicle-mediated transport	9.28007e-05	APOE,BCAP31,CAV1,CD36,CD9,CTSL,ITGB1,MSR1,MYO1E	rna_Thymus_c8,rna_Thymus_c13
AC002451.3	cluster_11	No	GO:0016525	BP	negative regulation of angiogenesis	0.0270537	PPARG,RGCC,SPARC	rna_Thymus_c8,rna_Thymus_c13
AC002451.3	cluster_11	No	GO:0019065	BP	receptor-mediated endocytosis of virus by host cell	0.00292914	CAV1,CTSL	rna_Thymus_c8,rna_Thymus_c13
AC002451.3	cluster_11	No	GO:0019216	BP	regulation of lipid metabolic process	0.0204729	APOC1,APOE,CAV1,PPARG	rna_Thymus_c8,rna_Thymus_c13
AC002451.3	cluster_11	No	GO:0019217	BP	regulation of fatty acid metabolic process	0.00748275	APOC1,CAV1,PPARG	rna_Thymus_c8,rna_Thymus_c13
AC002451.3	cluster_11	No	GO:0019752	BP	carboxylic acid metabolic process	0.00848606	CD36,LPL,MGST3,PPARG,SLC2A3	rna_Thymus_c8,rna_Thymus_c13
AC002451.3	cluster_11	No	GO:0019915	BP	lipid storage	0.0298865	CAV1,CD36	rna_Thymus_c8,rna_Thymus_c13
AC002451.3	cluster_11	No	GO:0019934	BP	cGMP-mediated signaling	0.0231201	APOE,CD36	rna_Thymus_c8,rna_Thymus_c13
AC002451.3	cluster_11	No	GO:0022603	BP	regulation of anatomical structure morphogenesis	0.000118791	CST3,DLC1,GPNMB,ITGB1,MSN,PID1,PPARG,RGCC,SPARC	rna_Thymus_c8,rna_Thymus_c13
AC002451.3	cluster_11	No	GO:0030048	BP	actin filament-based movement	0.0449888	GSN,MYO1E	rna_Thymus_c8,rna_Thymus_c13
AC002451.3	cluster_11	No	GO:0030155	BP	regulation of cell adhesion	0.0158234	CAV1,CD36,CD9,DLC1,GPNMB,RGCC	rna_Thymus_c8,rna_Thymus_c13
AC002451.3	cluster_11	No	GO:0030162	BP	regulation of proteolysis	4.9107e-05	APOE,BCAP31,CAV1,CST3,DLC1,GSN,PPARG,TIMP1	rna_Thymus_c8,rna_Thymus_c13
AC002451.3	cluster_11	No	GO:0030193	BP	regulation of blood coagulation	0.00468281	APOE,CAV1,CD9	rna_Thymus_c8,rna_Thymus_c13
AC002451.3	cluster_11	No	GO:0030301	BP	cholesterol transport	9.62045e-06	APOC1,APOE,CAV1,CD36,MSR1	rna_Thymus_c8,rna_Thymus_c13
AC002451.3	cluster_11	No	GO:0030334	BP	regulation of cell migration	7.97173e-05	APOE,CAV1,DLC1,GPNMB,ITGB1,MSN,PPARG,RGCC,SPARC,TIMP1	rna_Thymus_c8,rna_Thymus_c13
AC002451.3	cluster_11	No	GO:0030336	BP	negative regulation of cell migration	0.00378777	APOE,DLC1,PPARG,RGCC,TIMP1	rna_Thymus_c8,rna_Thymus_c13
AC002451.3	cluster_11	No	GO:0031329	BP	regulation of cellular catabolic process	0.000306213	APOC1,APOE,BCAP31,CAV1,CST3,MSN,TIMP1	rna_Thymus_c8,rna_Thymus_c13
AC002451.3	cluster_11	No	GO:0031330	BP	negative regulation of cellular catabolic process	0.0270537	APOC1,CST3,TIMP1	rna_Thymus_c8,rna_Thymus_c13
AC002451.3	cluster_11	No	GO:0031331	BP	positive regulation of cellular catabolic process	0.013267	APOE,BCAP31,CAV1,MSN	rna_Thymus_c8,rna_Thymus_c13
AC002451.3	cluster_11	No	GO:0031400	BP	negative regulation of protein modification process	0.036938	APOE,CAV1,PID1,PPARG	rna_Thymus_c8,rna_Thymus_c13
AC002451.3	cluster_11	No	GO:0031623	BP	receptor internalization	0.000676939	CAV1,CD36,CD9,ITGB1	rna_Thymus_c8,rna_Thymus_c13
AC002451.3	cluster_11	No	GO:0031667	BP	response to nutrient levels	0.0438851	APOE,LPL,PPARG	rna_Thymus_c8,rna_Thymus_c13
AC002451.3	cluster_11	No	GO:0031952	BP	regulation of protein autophosphorylation	0.0449888	CAV1,GPNMB	rna_Thymus_c8,rna_Thymus_c13
AC002451.3	cluster_11	No	GO:0032092	BP	positive regulation of protein binding	0.0449888	APOE,CAV1	rna_Thymus_c8,rna_Thymus_c13
AC002451.3	cluster_11	No	GO:0032101	BP	regulation of response to external stimulus	0.00789597	A2M,APOE,CAV1,CD36,CD9,LPL,PPARG	rna_Thymus_c8,rna_Thymus_c13
AC002451.3	cluster_11	No	GO:0032269	BP	negative regulation of cellular protein metabolic process	0.0058387	APOE,CAV1,CST3,PID1,PPARG,TIMP1	rna_Thymus_c8,rna_Thymus_c13
AC002451.3	cluster_11	No	GO:0032368	BP	regulation of lipid transport	0.00148332	APOC1,APOE,CAV1,PPARG	rna_Thymus_c8,rna_Thymus_c13
AC002451.3	cluster_11	No	GO:0032370	BP	positive regulation of lipid transport	0.00748275	APOE,CAV1,PPARG	rna_Thymus_c8,rna_Thymus_c13
AC002451.3	cluster_11	No	GO:0032371	BP	regulation of sterol transport	0.000259347	APOC1,APOE,CAV1,PPARG	rna_Thymus_c8,rna_Thymus_c13
AC002451.3	cluster_11	No	GO:0032373	BP	positive regulation of sterol transport	0.00202651	APOE,CAV1,PPARG	rna_Thymus_c8,rna_Thymus_c13
AC002451.3	cluster_11	No	GO:0032374	BP	regulation of cholesterol transport	0.000259347	APOC1,APOE,CAV1,PPARG	rna_Thymus_c8,rna_Thymus_c13
AC002451.3	cluster_11	No	GO:0032376	BP	positive regulation of cholesterol transport	0.00202651	APOE,CAV1,PPARG	rna_Thymus_c8,rna_Thymus_c13
AC002451.3	cluster_11	No	GO:0032870	BP	cellular response to hormone stimulus	0.0484307	CAV1,CTSL,PPARG	rna_Thymus_c8,rna_Thymus_c13
AC002451.3	cluster_11	No	GO:0032880	BP	regulation of protein localization	0.000148819	APOE,BCAP31,FRMD4A,GSN,ITGB1,MSN,PID1,PPARG	rna_Thymus_c8,rna_Thymus_c13
AC002451.3	cluster_11	No	GO:0032970	BP	regulation of actin filament-based process	0.0234814	CAV1,DLC1,GSN,RGCC	rna_Thymus_c8,rna_Thymus_c13
AC002451.3	cluster_11	No	GO:0033043	BP	regulation of organelle organization	0.0039701	DLC1,GSN,MAP1B,MSN,PID1,PPARG,RGCC	rna_Thymus_c8,rna_Thymus_c13
AC002451.3	cluster_11	No	GO:0033344	BP	cholesterol efflux	0.0167955	APOC1,APOE	rna_Thymus_c8,rna_Thymus_c13
AC002451.3	cluster_11	No	GO:0033673	BP	negative regulation of kinase activity	0.0405928	APOE,CAV1,PPARG	rna_Thymus_c8,rna_Thymus_c13
AC002451.3	cluster_11	No	GO:0033700	BP	phospholipid efflux	0.0167955	APOC1,APOE	rna_Thymus_c8,rna_Thymus_c13
AC002451.3	cluster_11	No	GO:0033993	BP	response to lipid	0.00301389	CAV1,CD36,LPL,MSN,PID1,PPARG	rna_Thymus_c8,rna_Thymus_c13
AC002451.3	cluster_11	No	GO:0034103	BP	regulation of tissue remodeling	0.0039042	CST3,GPNMB,PPARG	rna_Thymus_c8,rna_Thymus_c13
AC002451.3	cluster_11	No	GO:0034104	BP	negative regulation of tissue remodeling	0.0110116	CST3,PPARG	rna_Thymus_c8,rna_Thymus_c13
AC002451.3	cluster_11	No	GO:0034367	BP	protein-containing complex remodeling	0.00468281	APOC1,APOE,LPL	rna_Thymus_c8,rna_Thymus_c13
AC002451.3	cluster_11	No	GO:0034368	BP	protein-lipid complex remodeling	0.00468281	APOC1,APOE,LPL	rna_Thymus_c8,rna_Thymus_c13
AC002451.3	cluster_11	No	GO:0034369	BP	plasma lipoprotein particle remodeling	0.00468281	APOC1,APOE,LPL	rna_Thymus_c8,rna_Thymus_c13
AC002451.3	cluster_11	No	GO:0034370	BP	triglyceride-rich lipoprotein particle remodeling	0.0167955	APOE,LPL	rna_Thymus_c8,rna_Thymus_c13
AC002451.3	cluster_11	No	GO:0034372	BP	very-low-density lipoprotein particle remodeling	0.0167955	APOE,LPL	rna_Thymus_c8,rna_Thymus_c13
AC002451.3	cluster_11	No	GO:0034375	BP	high-density lipoprotein particle remodeling	0.0298865	APOC1,APOE	rna_Thymus_c8,rna_Thymus_c13
AC002451.3	cluster_11	No	GO:0034377	BP	plasma lipoprotein particle assembly	0.0376808	APOC1,APOE	rna_Thymus_c8,rna_Thymus_c13
AC002451.3	cluster_11	No	GO:0034381	BP	plasma lipoprotein particle clearance	9.10664e-05	APOC1,APOE,CD36,MSR1	rna_Thymus_c8,rna_Thymus_c13
AC002451.3	cluster_11	No	GO:0034382	BP	chylomicron remnant clearance	0.00645021	APOC1,APOE	rna_Thymus_c8,rna_Thymus_c13
AC002451.3	cluster_11	No	GO:0034447	BP	very-low-density lipoprotein particle clearance	0.00292914	APOC1,APOE	rna_Thymus_c8,rna_Thymus_c13
AC002451.3	cluster_11	No	GO:0036293	BP	response to decreased oxygen levels	0.00248233	CAV1,EPAS1,PPARG,RGCC	rna_Thymus_c8,rna_Thymus_c13
AC002451.3	cluster_11	No	GO:0036294	BP	cellular response to decreased oxygen levels	0.00748275	EPAS1,PPARG,RGCC	rna_Thymus_c8,rna_Thymus_c13
AC002451.3	cluster_11	No	GO:0040012	BP	regulation of locomotion	0.000115066	APOE,CAV1,DLC1,GPNMB,ITGB1,MSN,PPARG,RGCC,SPARC,TIMP1	rna_Thymus_c8,rna_Thymus_c13
AC002451.3	cluster_11	No	GO:0040013	BP	negative regulation of locomotion	0.00645021	APOE,DLC1,PPARG,RGCC,TIMP1	rna_Thymus_c8,rna_Thymus_c13
AC002451.3	cluster_11	No	GO:0042176	BP	regulation of protein catabolic process	9.1292e-05	APOE,BCAP31,CAV1,CST3,MSN,TIMP1	rna_Thymus_c8,rna_Thymus_c13
AC002451.3	cluster_11	No	GO:0042177	BP	negative regulation of protein catabolic process	0.0167955	CST3,TIMP1	rna_Thymus_c8,rna_Thymus_c13
AC002451.3	cluster_11	No	GO:0042326	BP	negative regulation of phosphorylation	0.0216069	APOE,CAV1,PID1,PPARG	rna_Thymus_c8,rna_Thymus_c13
AC002451.3	cluster_11	No	GO:0042632	BP	cholesterol homeostasis	0.00570637	APOE,CAV1,LPL	rna_Thymus_c8,rna_Thymus_c13
AC002451.3	cluster_11	No	GO:0042953	BP	lipoprotein transport	0.00645021	CD36,PPARG	rna_Thymus_c8,rna_Thymus_c13
AC002451.3	cluster_11	No	GO:0042981	BP	regulation of apoptotic process	0.000684455	APOE,ARHGAP10,BCAP31,CAV1,DLC1,GSN,ITGB1,PPARG,RGCC	rna_Thymus_c8,rna_Thymus_c13
AC002451.3	cluster_11	No	GO:0043065	BP	positive regulation of apoptotic process	9.1292e-05	BCAP31,CAV1,DLC1,GSN,ITGB1,PPARG,RGCC	rna_Thymus_c8,rna_Thymus_c13
AC002451.3	cluster_11	No	GO:0043067	BP	regulation of programmed cell death	0.00079345	APOE,ARHGAP10,BCAP31,CAV1,DLC1,GSN,ITGB1,PPARG,RGCC	rna_Thymus_c8,rna_Thymus_c13
AC002451.3	cluster_11	No	GO:0043068	BP	positive regulation of programmed cell death	0.00011003	BCAP31,CAV1,DLC1,GSN,ITGB1,PPARG,RGCC	rna_Thymus_c8,rna_Thymus_c13
AC002451.3	cluster_11	No	GO:0043085	BP	positive regulation of catalytic activity	0.00292914	APOE,BCAP31,CAV1,DLC1,GSN,ITGB1,PPARG,RGCC	rna_Thymus_c8,rna_Thymus_c13
AC002451.3	cluster_11	No	GO:0043086	BP	negative regulation of catalytic activity	0.00218523	APOC1,APOE,CAV1,CST3,PPARG,TIMP1	rna_Thymus_c8,rna_Thymus_c13
AC002451.3	cluster_11	No	GO:0043112	BP	receptor metabolic process	0.000959004	CAV1,CD36,CD9,ITGB1	rna_Thymus_c8,rna_Thymus_c13
AC002451.3	cluster_11	No	GO:0043280	BP	positive regulation of cysteine-type endopeptidase activity involved in apoptotic process	0.000432796	BCAP31,DLC1,GSN,PPARG	rna_Thymus_c8,rna_Thymus_c13
AC002451.3	cluster_11	No	GO:0043281	BP	regulation of cysteine-type endopeptidase activity involved in apoptotic process	0.00196649	BCAP31,DLC1,GSN,PPARG	rna_Thymus_c8,rna_Thymus_c13
AC002451.3	cluster_11	No	GO:0043409	BP	negative regulation of MAPK cascade	0.0207691	APOE,CAV1,PPARG	rna_Thymus_c8,rna_Thymus_c13
AC002451.3	cluster_11	No	GO:0043436	BP	oxoacid metabolic process	0.0089372	CD36,LPL,MGST3,PPARG,SLC2A3	rna_Thymus_c8,rna_Thymus_c13
AC002451.3	cluster_11	No	GO:0043535	BP	regulation of blood vessel endothelial cell migration	0.00879553	APOE,PPARG,RGCC	rna_Thymus_c8,rna_Thymus_c13
AC002451.3	cluster_11	No	GO:0043537	BP	negative regulation of blood vessel endothelial cell migration	0.00148332	APOE,PPARG,RGCC	rna_Thymus_c8,rna_Thymus_c13
AC002451.3	cluster_11	No	GO:0043903	BP	regulation of biological process involved in symbiotic interaction	0.0039042	CAV1,GSN,IFITM3	rna_Thymus_c8,rna_Thymus_c13
AC002451.3	cluster_11	No	GO:0044087	BP	regulation of cellular component biogenesis	0.00279881	APOE,CAV1,CD36,DLC1,GSN,MSN,RGCC	rna_Thymus_c8,rna_Thymus_c13
AC002451.3	cluster_11	No	GO:0044092	BP	negative regulation of molecular function	0.00292914	APOC1,APOE,CAV1,CST3,ID3,PPARG,TIMP1	rna_Thymus_c8,rna_Thymus_c13
AC002451.3	cluster_11	No	GO:0044255	BP	cellular lipid metabolic process	0.000959004	APOC1,APOE,CAV1,CD36,LPL,PPARG,PRDX6	rna_Thymus_c8,rna_Thymus_c13
AC002451.3	cluster_11	No	GO:0044281	BP	small molecule metabolic process	0.0239084	APOE,CD36,LPL,MGST3,PPARG,SLC2A3	rna_Thymus_c8,rna_Thymus_c13
AC002451.3	cluster_11	No	GO:0044872	BP	lipoprotein localization	0.00645021	CD36,PPARG	rna_Thymus_c8,rna_Thymus_c13
AC002451.3	cluster_11	No	GO:0045165	BP	cell fate commitment	0.0207691	CTSL,EPAS1,PPARG	rna_Thymus_c8,rna_Thymus_c13
AC002451.3	cluster_11	No	GO:0045444	BP	fat cell differentiation	0.0449888	MAFB,PPARG	rna_Thymus_c8,rna_Thymus_c13
AC002451.3	cluster_11	No	GO:0045597	BP	positive regulation of cell differentiation	0.0471572	CD36,LPL,MSR1,PPARG,RGCC	rna_Thymus_c8,rna_Thymus_c13
AC002451.3	cluster_11	No	GO:0045600	BP	positive regulation of fat cell differentiation	0.0449888	LPL,PPARG	rna_Thymus_c8,rna_Thymus_c13
AC002451.3	cluster_11	No	GO:0045732	BP	positive regulation of protein catabolic process	0.00515831	APOE,BCAP31,CAV1,MSN	rna_Thymus_c8,rna_Thymus_c13
AC002451.3	cluster_11	No	GO:0045765	BP	regulation of angiogenesis	0.0036455	GPNMB,ITGB1,PPARG,RGCC,SPARC	rna_Thymus_c8,rna_Thymus_c13
AC002451.3	cluster_11	No	GO:0045834	BP	positive regulation of lipid metabolic process	0.0350787	APOC1,APOE,PPARG	rna_Thymus_c8,rna_Thymus_c13
AC002451.3	cluster_11	No	GO:0045862	BP	positive regulation of proteolysis	0.000146693	APOE,BCAP31,CAV1,DLC1,GSN,PPARG	rna_Thymus_c8,rna_Thymus_c13
AC002451.3	cluster_11	No	GO:0045936	BP	negative regulation of phosphate metabolic process	0.00449025	APOC1,APOE,CAV1,PID1,PPARG	rna_Thymus_c8,rna_Thymus_c13
AC002451.3	cluster_11	No	GO:0045937	BP	positive regulation of phosphate metabolic process	0.0309393	CAV1,DLC1,GPNMB,PID1,PPARG,RGCC	rna_Thymus_c8,rna_Thymus_c13
AC002451.3	cluster_11	No	GO:0045940	BP	positive regulation of steroid metabolic process	0.0449888	APOC1,APOE	rna_Thymus_c8,rna_Thymus_c13
AC002451.3	cluster_11	No	GO:0046486	BP	glycerolipid metabolic process	0.00195781	APOC1,APOE,CAV1,LPL,PRDX6	rna_Thymus_c8,rna_Thymus_c13
AC002451.3	cluster_11	No	GO:0046503	BP	glycerolipid catabolic process	0.0376808	LPL,PRDX6	rna_Thymus_c8,rna_Thymus_c13
AC002451.3	cluster_11	No	GO:0046596	BP	regulation of viral entry into host cell	0.0231201	GSN,IFITM3	rna_Thymus_c8,rna_Thymus_c13
AC002451.3	cluster_11	No	GO:0046597	BP	negative regulation of viral entry into host cell	0.0110116	GSN,IFITM3	rna_Thymus_c8,rna_Thymus_c13
AC002451.3	cluster_11	No	GO:0046794	BP	transport of virus	0.0110116	CAV1,CTSL	rna_Thymus_c8,rna_Thymus_c13
AC002451.3	cluster_11	No	GO:0048646	BP	anatomical structure formation involved in morphogenesis	0.0156094	CALD1,CD9,DLC1,ITGB1,MAFB	rna_Thymus_c8,rna_Thymus_c13
AC002451.3	cluster_11	No	GO:0048878	BP	chemical homeostasis	0.0449888	APOE,BCAP31,CAV1,CD36,LPL,PPARG	rna_Thymus_c8,rna_Thymus_c13
AC002451.3	cluster_11	No	GO:0050678	BP	regulation of epithelial cell proliferation	0.00378777	APOE,CAV1,PPARG,RGCC,SPARC	rna_Thymus_c8,rna_Thymus_c13
AC002451.3	cluster_11	No	GO:0050680	BP	negative regulation of epithelial cell proliferation	5.01973e-05	APOE,CAV1,PPARG,RGCC,SPARC	rna_Thymus_c8,rna_Thymus_c13
AC002451.3	cluster_11	No	GO:0050818	BP	regulation of coagulation	0.00468281	APOE,CAV1,CD9	rna_Thymus_c8,rna_Thymus_c13
AC002451.3	cluster_11	No	GO:0050878	BP	regulation of body fluid levels	0.0093633	APOE,CAV1,CD36,CD9	rna_Thymus_c8,rna_Thymus_c13
AC002451.3	cluster_11	No	GO:0051050	BP	positive regulation of transport	0.00119287	APOE,BCAP31,CAV1,FRMD4A,ITGB1,MSN,PPARG,RGCC	rna_Thymus_c8,rna_Thymus_c13
AC002451.3	cluster_11	No	GO:0051051	BP	negative regulation of transport	0.0379439	APOC1,APOE,CAV1,PID1	rna_Thymus_c8,rna_Thymus_c13
AC002451.3	cluster_11	No	GO:0051055	BP	negative regulation of lipid biosynthetic process	0.0376808	APOC1,APOE	rna_Thymus_c8,rna_Thymus_c13
AC002451.3	cluster_11	No	GO:0051090	BP	regulation of DNA-binding transcription factor activity	0.00500368	CAV1,CD36,ID3,PPARG,RGCC	rna_Thymus_c8,rna_Thymus_c13
AC002451.3	cluster_11	No	GO:0051091	BP	positive regulation of DNA-binding transcription factor activity	0.00748275	CAV1,CD36,PPARG,RGCC	rna_Thymus_c8,rna_Thymus_c13
AC002451.3	cluster_11	No	GO:0051093	BP	negative regulation of developmental process	0.0119355	CAV1,CST3,MAFB,PPARG,RGCC,SPARC	rna_Thymus_c8,rna_Thymus_c13
AC002451.3	cluster_11	No	GO:0051094	BP	positive regulation of developmental process	0.0131345	APOE,CD36,ITGB1,LPL,MSR1,PPARG,RGCC	rna_Thymus_c8,rna_Thymus_c13
AC002451.3	cluster_11	No	GO:0051099	BP	positive regulation of binding	0.0150878	APOE,CAV1,PPARG	rna_Thymus_c8,rna_Thymus_c13
AC002451.3	cluster_11	No	GO:0051129	BP	negative regulation of cellular component organization	0.000676939	APOC1,APOE,CAV1,CST3,DLC1,GSN,PPARG	rna_Thymus_c8,rna_Thymus_c13
AC002451.3	cluster_11	No	GO:0051223	BP	regulation of protein transport	0.0449888	APOE,BCAP31,FRMD4A,PPARG	rna_Thymus_c8,rna_Thymus_c13
AC002451.3	cluster_11	No	GO:0051235	BP	maintenance of location	0.0270537	CAV1,CD36,GSN	rna_Thymus_c8,rna_Thymus_c13
AC002451.3	cluster_11	No	GO:0051241	BP	negative regulation of multicellular organismal process	4.95574e-05	APOC1,APOE,CD9,CST3,GPNMB,MAFB,PPARG,RGCC,SPARC,TIMP1	rna_Thymus_c8,rna_Thymus_c13
AC002451.3	cluster_11	No	GO:0051248	BP	negative regulation of protein metabolic process	0.00722879	APOE,CAV1,CST3,PID1,PPARG,TIMP1	rna_Thymus_c8,rna_Thymus_c13
AC002451.3	cluster_11	No	GO:0051270	BP	regulation of cellular component movement	2.85933e-05	APOE,CAV1,CD9,DLC1,GPNMB,ITGB1,MSN,PPARG,RGCC,SPARC,TIMP1	rna_Thymus_c8,rna_Thymus_c13
AC002451.3	cluster_11	No	GO:0051271	BP	negative regulation of cellular component movement	0.000720404	APOE,CD9,DLC1,PPARG,RGCC,TIMP1	rna_Thymus_c8,rna_Thymus_c13
AC002451.3	cluster_11	No	GO:0051336	BP	regulation of hydrolase activity	0.000118791	APOC1,BCAP31,CAV1,CST3,DLC1,GSN,ITGB1,PPARG,TIMP1	rna_Thymus_c8,rna_Thymus_c13
AC002451.3	cluster_11	No	GO:0051345	BP	positive regulation of hydrolase activity	0.0179921	BCAP31,DLC1,GSN,ITGB1,PPARG	rna_Thymus_c8,rna_Thymus_c13
AC002451.3	cluster_11	No	GO:0051348	BP	negative regulation of transferase activity	0.0452729	APOE,CAV1,PPARG	rna_Thymus_c8,rna_Thymus_c13
AC002451.3	cluster_11	No	GO:0051493	BP	regulation of cytoskeleton organization	0.0454201	DLC1,GSN,MAP1B,RGCC	rna_Thymus_c8,rna_Thymus_c13
AC002451.3	cluster_11	No	GO:0051649	BP	establishment of localization in cell	0.0269708	APOE,BCAP31,ITGB1,MYO1E,SYN3,TUBA1B	rna_Thymus_c8,rna_Thymus_c13
AC002451.3	cluster_11	No	GO:0052372	BP	modulation by symbiont of entry into host	0.00202651	CAV1,GSN,IFITM3	rna_Thymus_c8,rna_Thymus_c13
AC002451.3	cluster_11	No	GO:0052547	BP	regulation of peptidase activity	4.09504e-05	BCAP31,CAV1,CST3,DLC1,GSN,PPARG,TIMP1	rna_Thymus_c8,rna_Thymus_c13
AC002451.3	cluster_11	No	GO:0052548	BP	regulation of endopeptidase activity	0.00203888	BCAP31,DLC1,GSN,PPARG,TIMP1	rna_Thymus_c8,rna_Thymus_c13
AC002451.3	cluster_11	No	GO:0055088	BP	lipid homeostasis	0.000800896	APOE,CAV1,LPL,PPARG	rna_Thymus_c8,rna_Thymus_c13
AC002451.3	cluster_11	No	GO:0055090	BP	acylglycerol homeostasis	0.0449888	APOE,LPL	rna_Thymus_c8,rna_Thymus_c13
AC002451.3	cluster_11	No	GO:0055092	BP	sterol homeostasis	0.00570637	APOE,CAV1,LPL	rna_Thymus_c8,rna_Thymus_c13
AC002451.3	cluster_11	No	GO:0055094	BP	response to lipoprotein particle	1.48734e-05	CD36,CD9,ITGB1,PPARG	rna_Thymus_c8,rna_Thymus_c13
AC002451.3	cluster_11	No	GO:0060341	BP	regulation of cellular localization	0.00411111	BCAP31,CAV1,GSN,ITGB1,MSN,PID1	rna_Thymus_c8,rna_Thymus_c13
AC002451.3	cluster_11	No	GO:0061024	BP	membrane organization	0.00378777	CAV1,CD36,CD9,CTSL,GSN,MSR1	rna_Thymus_c8,rna_Thymus_c13
AC002451.3	cluster_11	No	GO:0061041	BP	regulation of wound healing	0.00218523	APOE,CAV1,CD9,ITGB1	rna_Thymus_c8,rna_Thymus_c13
AC002451.3	cluster_11	No	GO:0061136	BP	regulation of proteasomal protein catabolic process	0.011428	APOE,BCAP31,CAV1	rna_Thymus_c8,rna_Thymus_c13
AC002451.3	cluster_11	No	GO:0062012	BP	regulation of small molecule metabolic process	0.00119287	APOC1,APOE,CAV1,PID1,PPARG	rna_Thymus_c8,rna_Thymus_c13
AC002451.3	cluster_11	No	GO:0062014	BP	negative regulation of small molecule metabolic process	0.0039042	APOC1,APOE,PID1	rna_Thymus_c8,rna_Thymus_c13
AC002451.3	cluster_11	No	GO:0065005	BP	protein-lipid complex assembly	0.0376808	APOC1,APOE	rna_Thymus_c8,rna_Thymus_c13
AC002451.3	cluster_11	No	GO:0070201	BP	regulation of establishment of protein localization	0.0492918	APOE,BCAP31,FRMD4A,PPARG	rna_Thymus_c8,rna_Thymus_c13
AC002451.3	cluster_11	No	GO:0070328	BP	triglyceride homeostasis	0.0449888	APOE,LPL	rna_Thymus_c8,rna_Thymus_c13
AC002451.3	cluster_11	No	GO:0070482	BP	response to oxygen levels	0.00278682	CAV1,EPAS1,PPARG,RGCC	rna_Thymus_c8,rna_Thymus_c13
AC002451.3	cluster_11	No	GO:0070542	BP	response to fatty acid	0.00104734	CD36,LPL,PID1	rna_Thymus_c8,rna_Thymus_c13
AC002451.3	cluster_11	No	GO:0071310	BP	cellular response to organic substance	0.0142829	CAV1,CD36,CTSL,LPL,MSN,PID1,PPARG	rna_Thymus_c8,rna_Thymus_c13
AC002451.3	cluster_11	No	GO:0071398	BP	cellular response to fatty acid	0.0110116	LPL,PID1	rna_Thymus_c8,rna_Thymus_c13
AC002451.3	cluster_11	No	GO:0071402	BP	cellular response to lipoprotein particle stimulus	1.48734e-05	CD36,CD9,ITGB1,PPARG	rna_Thymus_c8,rna_Thymus_c13
AC002451.3	cluster_11	No	GO:0071404	BP	cellular response to low-density lipoprotein particle stimulus	6.30284e-06	CD36,CD9,ITGB1,PPARG	rna_Thymus_c8,rna_Thymus_c13
AC002451.3	cluster_11	No	GO:0071453	BP	cellular response to oxygen levels	0.000676939	CAV1,EPAS1,PPARG,RGCC	rna_Thymus_c8,rna_Thymus_c13
AC002451.3	cluster_11	No	GO:0071456	BP	cellular response to hypoxia	0.00748275	EPAS1,PPARG,RGCC	rna_Thymus_c8,rna_Thymus_c13
AC002451.3	cluster_11	No	GO:0071702	BP	organic substance transport	2.48793e-05	APOC1,APOE,BCAP31,CAV1,CD36,MSR1,PPARG,RBP7,SLC1A3,SLC2A3,SLCO2B1	rna_Thymus_c8,rna_Thymus_c13
AC002451.3	cluster_11	No	GO:0071825	BP	protein-lipid complex subunit organization	0.00645021	APOC1,APOE,LPL	rna_Thymus_c8,rna_Thymus_c13
AC002451.3	cluster_11	No	GO:0071827	BP	plasma lipoprotein particle organization	0.00645021	APOC1,APOE,LPL	rna_Thymus_c8,rna_Thymus_c13
AC002451.3	cluster_11	No	GO:0071830	BP	triglyceride-rich lipoprotein particle clearance	0.00645021	APOC1,APOE	rna_Thymus_c8,rna_Thymus_c13
AC002451.3	cluster_11	No	GO:0075509	BP	endocytosis involved in viral entry into host cell	0.00292914	CAV1,CTSL	rna_Thymus_c8,rna_Thymus_c13
AC002451.3	cluster_11	No	GO:0080134	BP	regulation of response to stress	0.0037412	A2M,APOE,BCAP31,CAV1,CD9,ITGB1,LPL,PPARG	rna_Thymus_c8,rna_Thymus_c13
AC002451.3	cluster_11	No	GO:0097242	BP	amyloid-beta clearance	0.0376808	CD36,MSR1	rna_Thymus_c8,rna_Thymus_c13
AC002451.3	cluster_11	No	GO:0097435	BP	supramolecular fiber organization	0.00192442	CALD1,CD36,CST3,GSN,MARCKS,MYO1E	rna_Thymus_c8,rna_Thymus_c13
AC002451.3	cluster_11	No	GO:0098739	BP	import across plasma membrane	0.0376808	CD36,SLC1A3,SLC2A3	rna_Thymus_c8,rna_Thymus_c13
AC002451.3	cluster_11	No	GO:0120036	BP	plasma membrane bounded cell projection organization	0.0413773	APOE,GSN,ITGB1,MAP1B	rna_Thymus_c8,rna_Thymus_c13
AC002451.3	cluster_11	No	GO:0120161	BP	regulation of cold-induced thermogenesis	0.0452729	CAV1,CD36,EPAS1	rna_Thymus_c8,rna_Thymus_c13
AC002451.3	cluster_11	No	GO:0120162	BP	positive regulation of cold-induced thermogenesis	0.0270537	CAV1,CD36,EPAS1	rna_Thymus_c8,rna_Thymus_c13
AC002451.3	cluster_11	No	GO:0140253	BP	cell-cell fusion	0.0231201	CD9,ITGB1	rna_Thymus_c8,rna_Thymus_c13
AC002451.3	cluster_11	No	GO:0150104	BP	transport across blood-brain barrier	0.00131905	CD36,SLC1A3,SLC2A3,SLCO2B1	rna_Thymus_c8,rna_Thymus_c13
AC002451.3	cluster_11	No	GO:1900046	BP	regulation of hemostasis	0.00570637	APOE,CAV1,CD9	rna_Thymus_c8,rna_Thymus_c13
AC002451.3	cluster_11	No	GO:1901342	BP	regulation of vasculature development	0.00378777	GPNMB,ITGB1,PPARG,RGCC,SPARC	rna_Thymus_c8,rna_Thymus_c13
AC002451.3	cluster_11	No	GO:1901343	BP	negative regulation of vasculature development	0.0296435	PPARG,RGCC,SPARC	rna_Thymus_c8,rna_Thymus_c13
AC002451.3	cluster_11	No	GO:1901653	BP	cellular response to peptide	0.0207691	CAV1,CD36,PPARG	rna_Thymus_c8,rna_Thymus_c13
AC002451.3	cluster_11	No	GO:1901698	BP	response to nitrogen compound	0.0093633	CAV1,CD36,CD9,ITGB1,PPARG	rna_Thymus_c8,rna_Thymus_c13
AC002451.3	cluster_11	No	GO:1901700	BP	response to oxygen-containing compound	0.00632626	APOE,CAV1,CD36,LPL,MSN,PID1,PPARG	rna_Thymus_c8,rna_Thymus_c13
AC002451.3	cluster_11	No	GO:1901701	BP	cellular response to oxygen-containing compound	0.0058387	CAV1,CD36,LPL,MSN,PID1,PPARG	rna_Thymus_c8,rna_Thymus_c13
AC002451.3	cluster_11	No	GO:1901879	BP	regulation of protein depolymerization	0.0449888	GSN,MAP1B	rna_Thymus_c8,rna_Thymus_c13
AC002451.3	cluster_11	No	GO:1901979	BP	regulation of inward rectifier potassium channel activity	0.00292914	CAV1,ITGB1	rna_Thymus_c8,rna_Thymus_c13
AC002451.3	cluster_11	No	GO:1902532	BP	negative regulation of intracellular signal transduction	0.0350787	APOE,CAV1,DLC1,PPARG	rna_Thymus_c8,rna_Thymus_c13
AC002451.3	cluster_11	No	GO:1902533	BP	positive regulation of intracellular signal transduction	0.0289548	APOE,BCAP31,CAV1,CD36,GPNMB,ITGB1	rna_Thymus_c8,rna_Thymus_c13
AC002451.3	cluster_11	No	GO:1902903	BP	regulation of supramolecular fiber organization	0.00240646	APOE,DLC1,GSN,MAP1B,RGCC	rna_Thymus_c8,rna_Thymus_c13
AC002451.3	cluster_11	No	GO:1902904	BP	negative regulation of supramolecular fiber organization	0.0231201	APOE,DLC1,GSN	rna_Thymus_c8,rna_Thymus_c13
AC002451.3	cluster_11	No	GO:1902905	BP	positive regulation of supramolecular fiber organization	0.0270537	APOE,GSN,RGCC	rna_Thymus_c8,rna_Thymus_c13
AC002451.3	cluster_11	No	GO:1903034	BP	regulation of response to wounding	0.00278682	APOE,CAV1,CD9,ITGB1	rna_Thymus_c8,rna_Thymus_c13
AC002451.3	cluster_11	No	GO:1903050	BP	regulation of proteolysis involved in cellular protein catabolic process	0.0150878	APOE,BCAP31,CAV1	rna_Thymus_c8,rna_Thymus_c13
AC002451.3	cluster_11	No	GO:1903053	BP	regulation of extracellular matrix organization	0.00645021	CST3,RGCC	rna_Thymus_c8,rna_Thymus_c13
AC002451.3	cluster_11	No	GO:1903069	BP	regulation of ER-associated ubiquitin-dependent protein catabolic process	0.00292914	BCAP31,CAV1	rna_Thymus_c8,rna_Thymus_c13
AC002451.3	cluster_11	No	GO:1903071	BP	positive regulation of ER-associated ubiquitin-dependent protein catabolic process	0.00292914	BCAP31,CAV1	rna_Thymus_c8,rna_Thymus_c13
AC002451.3	cluster_11	No	GO:1903362	BP	regulation of cellular protein catabolic process	0.00148332	APOE,BCAP31,CAV1,MSN	rna_Thymus_c8,rna_Thymus_c13
AC002451.3	cluster_11	No	GO:1903364	BP	positive regulation of cellular protein catabolic process	0.000676939	APOE,BCAP31,CAV1,MSN	rna_Thymus_c8,rna_Thymus_c13
AC002451.3	cluster_11	No	GO:1903829	BP	positive regulation of protein localization	0.00378777	BCAP31,FRMD4A,ITGB1,MSN,PPARG	rna_Thymus_c8,rna_Thymus_c13
AC002451.3	cluster_11	No	GO:1903901	BP	negative regulation of viral life cycle	0.0110116	GSN,IFITM3	rna_Thymus_c8,rna_Thymus_c13
AC002451.3	cluster_11	No	GO:1904037	BP	positive regulation of epithelial cell apoptotic process	0.0231201	GSN,RGCC	rna_Thymus_c8,rna_Thymus_c13
AC002451.3	cluster_11	No	GO:1904292	BP	regulation of ERAD pathway	0.00292914	BCAP31,CAV1	rna_Thymus_c8,rna_Thymus_c13
AC002451.3	cluster_11	No	GO:1904294	BP	positive regulation of ERAD pathway	0.00292914	BCAP31,CAV1	rna_Thymus_c8,rna_Thymus_c13
AC002451.3	cluster_11	No	GO:1904893	BP	negative regulation of receptor signaling pathway via STAT	0.0298865	CAV1,PPARG	rna_Thymus_c8,rna_Thymus_c13
AC002451.3	cluster_11	No	GO:1905475	BP	regulation of protein localization to membrane	0.0231201	GSN,ITGB1,PID1	rna_Thymus_c8,rna_Thymus_c13
AC002451.3	cluster_11	No	GO:1905898	BP	positive regulation of response to endoplasmic reticulum stress	0.0110116	BCAP31,CAV1	rna_Thymus_c8,rna_Thymus_c13
AC002451.3	cluster_11	No	GO:1905952	BP	regulation of lipid localization	2.48793e-05	APOC1,APOE,CAV1,LPL,MSR1,PPARG	rna_Thymus_c8,rna_Thymus_c13
AC002451.3	cluster_11	No	GO:1905953	BP	negative regulation of lipid localization	0.0449888	APOC1,PPARG	rna_Thymus_c8,rna_Thymus_c13
AC002451.3	cluster_11	No	GO:1905954	BP	positive regulation of lipid localization	9.97363e-05	APOE,CAV1,LPL,MSR1,PPARG	rna_Thymus_c8,rna_Thymus_c13
AC002451.3	cluster_11	No	GO:1990000	BP	amyloid fibril formation	0.00292914	CD36,GSN	rna_Thymus_c8,rna_Thymus_c13
AC002451.3	cluster_11	No	GO:2000026	BP	regulation of multicellular organismal development	0.0177044	CAV1,GPNMB,ITGB1,MAFB,PPARG,RGCC,SPARC	rna_Thymus_c8,rna_Thymus_c13
AC002451.3	cluster_11	No	GO:2000116	BP	regulation of cysteine-type endopeptidase activity	0.00365083	BCAP31,DLC1,GSN,PPARG	rna_Thymus_c8,rna_Thymus_c13
AC002451.3	cluster_11	No	GO:2000145	BP	regulation of cell motility	9.1292e-05	APOE,CAV1,DLC1,GPNMB,ITGB1,MSN,PPARG,RGCC,SPARC,TIMP1	rna_Thymus_c8,rna_Thymus_c13
AC002451.3	cluster_11	No	GO:2000146	BP	negative regulation of cell motility	0.00426057	APOE,DLC1,PPARG,RGCC,TIMP1	rna_Thymus_c8,rna_Thymus_c13
AC002451.3	cluster_11	No	GO:2000181	BP	negative regulation of blood vessel morphogenesis	0.0296435	PPARG,RGCC,SPARC	rna_Thymus_c8,rna_Thymus_c13
AC002451.3	cluster_11	No	GO:2000209	BP	regulation of anoikis	0.0167955	CAV1,ITGB1	rna_Thymus_c8,rna_Thymus_c13
AC002451.3	cluster_11	No	GO:2000811	BP	negative regulation of anoikis	0.0167955	CAV1,ITGB1	rna_Thymus_c8,rna_Thymus_c13
AC002451.3	cluster_11	No	GO:2001056	BP	positive regulation of cysteine-type endopeptidase activity	0.000800896	BCAP31,DLC1,GSN,PPARG	rna_Thymus_c8,rna_Thymus_c13
AC002451.3	cluster_11	No	GO:2001244	BP	positive regulation of intrinsic apoptotic signaling pathway	0.0449888	BCAP31,CAV1	rna_Thymus_c8,rna_Thymus_c13
AC002451.3	cluster_18	No	GO:0006468	BP	protein phosphorylation	0.0122002	BAZ1B,EIF2AK2,HUNK,NEK10,RPS6KA3,RPS6KA5	rna_Kidney_c9,rna_Kidney_c3,rna_Kidney_c13,rna_Kidney_c16
AC002451.3	cluster_18	No	GO:0016310	BP	phosphorylation	0.015736	BAZ1B,EIF2AK2,HUNK,NEK10,RPS6KA3,RPS6KA5	rna_Kidney_c9,rna_Kidney_c3,rna_Kidney_c13,rna_Kidney_c16
AC002451.3	cluster_18	No	GO:0016570	BP	histone modification	0.0259348	BAZ1B,PRMT2,RPS6KA5,TRERF1	rna_Kidney_c9,rna_Kidney_c3,rna_Kidney_c13,rna_Kidney_c16
AC002451.3	cluster_18	No	GO:0016572	BP	histone phosphorylation	0.0330573	BAZ1B,RPS6KA5	rna_Kidney_c9,rna_Kidney_c3,rna_Kidney_c13,rna_Kidney_c16
AC002451.3	cluster_18	No	GO:0035455	BP	response to interferon-alpha	0.0330573	EIF2AK2,GATA3	rna_Kidney_c9,rna_Kidney_c3,rna_Kidney_c13,rna_Kidney_c16
AC002451.3	cluster_18	No	GO:0099039	BP	sphingolipid translocation	0.0142846	ABCB1,ABCC1	rna_Kidney_c9,rna_Kidney_c3,rna_Kidney_c13,rna_Kidney_c16
AC002451.3	cluster_18	No	GO:0140115	BP	export across plasma membrane	0.0152678	ABCB1,ABCC1,ATP1B3	rna_Kidney_c9,rna_Kidney_c3,rna_Kidney_c13,rna_Kidney_c16
AC002451.3	cluster_18	No	GO:0140352	BP	export from cell	0.00304173	ABCB1,ABCC1,ATP1B3,COPG2,EXOC1,UNC13C	rna_Kidney_c9,rna_Kidney_c3,rna_Kidney_c13,rna_Kidney_c16
AC002451.3	cluster_18	No	GO:1990164	BP	histone H2A phosphorylation	0.0142846	BAZ1B,RPS6KA5	rna_Kidney_c9,rna_Kidney_c3,rna_Kidney_c13,rna_Kidney_c16
AC002451.3	cluster_18	No	GO:1990962	BP	xenobiotic transport across blood-brain barrier	0.0142846	ABCB1,ABCC1	rna_Kidney_c9,rna_Kidney_c3,rna_Kidney_c13,rna_Kidney_c16
AC002463.3	cluster_16	No	GO:0001932	BP	regulation of protein phosphorylation	0.0318539	BMPR2,INSR,RPTOR,TAB2,TBK1,TFRC,UBASH3B	rna_Kidney_c30
AC002463.3	cluster_16	No	GO:0001934	BP	positive regulation of protein phosphorylation	0.0378256	BMPR2,INSR,RPTOR,TAB2,TBK1,TFRC	rna_Kidney_c30
AC002463.3	cluster_16	No	GO:0002347	BP	response to tumor cell	0.0393408	DAPK1,NOTCH2	rna_Kidney_c30
AC002463.3	cluster_16	No	GO:0003018	BP	vascular process in circulatory system	0.0326985	BMPR2,INSR,SLC38A2,TFRC	rna_Kidney_c30
AC002463.3	cluster_16	No	GO:0006468	BP	protein phosphorylation	0.035025	BMPR2,DAPK1,INSR,PRKCQ,TBK1	rna_Kidney_c30
AC002463.3	cluster_16	No	GO:0006470	BP	protein dephosphorylation	0.00311764	CTTNBP2NL,PPP2R5E,PTPRA,UBASH3B	rna_Kidney_c30
AC002463.3	cluster_16	No	GO:0006793	BP	phosphorus metabolic process	2.70476e-05	BMPR2,CTTNBP2NL,DAPK1,INSR,PGAP1,PPP2R5E,PRKCQ,PTPRA,RPTOR,TBK1,UBASH3B	rna_Kidney_c30
AC002463.3	cluster_16	No	GO:0006796	BP	phosphate-containing compound metabolic process	2.53402e-05	BMPR2,CTTNBP2NL,DAPK1,INSR,PGAP1,PPP2R5E,PRKCQ,PTPRA,RPTOR,TBK1,UBASH3B	rna_Kidney_c30
AC002463.3	cluster_16	No	GO:0006897	BP	endocytosis	0.0423528	ATP9A,INSR,MIB1,TFRC	rna_Kidney_c30
AC002463.3	cluster_16	No	GO:0007219	BP	Notch signaling pathway	0.00119202	MIB1,NOTCH2,RBPJ	rna_Kidney_c30
AC002463.3	cluster_16	No	GO:0009890	BP	negative regulation of biosynthetic process	0.00597146	BMPR2,DAPK1,MBD2,MBTD1,RBPJ,TCF25,WWC2,WWP2	rna_Kidney_c30
AC002463.3	cluster_16	No	GO:0009894	BP	regulation of catabolic process	0.00115064	DAPK1,INSR,RPTOR,SH3D19,TAB2,TBK1,WWP2	rna_Kidney_c30
AC002463.3	cluster_16	No	GO:0009896	BP	positive regulation of catabolic process	0.00730842	DAPK1,INSR,SH3D19,TBK1,WWP2	rna_Kidney_c30
AC002463.3	cluster_16	No	GO:0010232	BP	vascular transport	0.0393408	INSR,SLC38A2,TFRC	rna_Kidney_c30
AC002463.3	cluster_16	No	GO:0010506	BP	regulation of autophagy	0.0157131	DAPK1,RPTOR,TAB2,TBK1	rna_Kidney_c30
AC002463.3	cluster_16	No	GO:0010558	BP	negative regulation of macromolecule biosynthetic process	0.00422683	BMPR2,DAPK1,MBD2,MBTD1,RBPJ,TCF25,WWC2,WWP2	rna_Kidney_c30
AC002463.3	cluster_16	No	GO:0010562	BP	positive regulation of phosphorus metabolic process	0.0172137	BMPR2,INSR,MAGI2,RPTOR,TAB2,TBK1,TFRC	rna_Kidney_c30
AC002463.3	cluster_16	No	GO:0016192	BP	vesicle-mediated transport	0.038932	ATP9A,INSR,MIB1,MON2,PGAP1,TFRC	rna_Kidney_c30
AC002463.3	cluster_16	No	GO:0016310	BP	phosphorylation	0.00775057	BMPR2,DAPK1,INSR,PRKCQ,RPTOR,TBK1	rna_Kidney_c30
AC002463.3	cluster_16	No	GO:0016311	BP	dephosphorylation	0.00365356	CTTNBP2NL,PPP2R5E,PTPRA,UBASH3B	rna_Kidney_c30
AC002463.3	cluster_16	No	GO:0031327	BP	negative regulation of cellular biosynthetic process	0.00535175	BMPR2,DAPK1,MBD2,MBTD1,RBPJ,TCF25,WWC2,WWP2	rna_Kidney_c30
AC002463.3	cluster_16	No	GO:0031329	BP	regulation of cellular catabolic process	0.00535175	DAPK1,INSR,RPTOR,SH3D19,TAB2,TBK1	rna_Kidney_c30
AC002463.3	cluster_16	No	GO:0031331	BP	positive regulation of cellular catabolic process	0.0326985	DAPK1,INSR,SH3D19,TBK1	rna_Kidney_c30
AC002463.3	cluster_16	No	GO:0031401	BP	positive regulation of protein modification process	0.0159389	BMPR2,INSR,MAGI2,RPTOR,TAB2,TBK1,TFRC	rna_Kidney_c30
AC002463.3	cluster_16	No	GO:0033135	BP	regulation of peptidyl-serine phosphorylation	0.0362813	RPTOR,TBK1,TFRC	rna_Kidney_c30
AC002463.3	cluster_16	No	GO:0033138	BP	positive regulation of peptidyl-serine phosphorylation	0.0299365	RPTOR,TBK1,TFRC	rna_Kidney_c30
AC002463.3	cluster_16	No	GO:0034762	BP	regulation of transmembrane transport	0.0293122	CTTNBP2NL,DAPK1,INSR,UBASH3B,WWP2	rna_Kidney_c30
AC002463.3	cluster_16	No	GO:0040008	BP	regulation of growth	0.00162929	BMPR2,INSR,PRKCQ,RBPJ,RPTOR,WWC2	rna_Kidney_c30
AC002463.3	cluster_16	No	GO:0042327	BP	positive regulation of phosphorylation	0.0478848	BMPR2,INSR,RPTOR,TAB2,TBK1,TFRC	rna_Kidney_c30
AC002463.3	cluster_16	No	GO:0043085	BP	positive regulation of catalytic activity	0.0307868	DAPK1,DOCK9,INSR,MAGI2,PRKCQ,RPTOR,TAB2	rna_Kidney_c30
AC002463.3	cluster_16	No	GO:0043123	BP	positive regulation of I-kappaB kinase/NF-kappaB signaling	0.0362813	TAB2,TBK1,TFRC	rna_Kidney_c30
AC002463.3	cluster_16	No	GO:0045807	BP	positive regulation of endocytosis	0.0474092	INSR,MAGI2,WASL	rna_Kidney_c30
AC002463.3	cluster_16	No	GO:0045934	BP	negative regulation of nucleobase-containing compound metabolic process	0.0217698	BMPR2,MBD2,MBTD1,RBPJ,TCF25,WWC2,WWP2	rna_Kidney_c30
AC002463.3	cluster_16	No	GO:0045937	BP	positive regulation of phosphate metabolic process	0.0172137	BMPR2,INSR,MAGI2,RPTOR,TAB2,TBK1,TFRC	rna_Kidney_c30
AC002463.3	cluster_16	No	GO:0048260	BP	positive regulation of receptor-mediated endocytosis	0.0227047	INSR,MAGI2,WASL	rna_Kidney_c30
AC002463.3	cluster_16	No	GO:0051052	BP	regulation of DNA metabolic process	0.0175082	BMPR2,MBTD1,PRKCQ,TFRC	rna_Kidney_c30
AC002463.3	cluster_16	No	GO:0051054	BP	positive regulation of DNA metabolic process	0.0474092	MBTD1,PRKCQ,TFRC	rna_Kidney_c30
AC002463.3	cluster_16	No	GO:0060627	BP	regulation of vesicle-mediated transport	0.0454962	ATP9A,INSR,MAGI2,PGAP1,WASL	rna_Kidney_c30
AC002463.3	cluster_16	No	GO:0061311	BP	cell surface receptor signaling pathway involved in heart development	0.0169525	NOTCH2,RBPJ	rna_Kidney_c30
AC002463.3	cluster_16	No	GO:0061314	BP	Notch signaling involved in heart development	0.00681263	NOTCH2,RBPJ	rna_Kidney_c30
AC002463.3	cluster_16	No	GO:0150104	BP	transport across blood-brain barrier	0.0393408	INSR,SLC38A2,TFRC	rna_Kidney_c30
AC002463.3	cluster_16	No	GO:2000112	BP	regulation of cellular macromolecule biosynthetic process	0.00880155	BMPR2,DAPK1,INSR,PRKCQ,SLC25A37	rna_Kidney_c30
AC002463.3	cluster_16	No	GO:2000136	BP	regulation of cell proliferation involved in heart morphogenesis	0.0393408	BMPR2,RBPJ	rna_Kidney_c30
AC002463.3	cluster_2	No	GO:0008104	BP	protein localization	0.0297148	CEP83,CHM,COPG2,PPARG,RAB22A,RAB28,XRCC5	rna_Lung_c9,rna_Lung_c20,rna_Large_Intestine_c8
AC002463.3	cluster_2	No	GO:0015031	BP	protein transport	0.0420062	CHM,COPG2,PPARG,RAB22A,RAB28	rna_Lung_c9,rna_Lung_c20,rna_Large_Intestine_c8
AC002463.3	cluster_2	No	GO:0033036	BP	macromolecule localization	0.0297148	CEP83,CHM,COPG2,PPARG,RAB22A,RAB28,XRCC5	rna_Lung_c9,rna_Lung_c20,rna_Large_Intestine_c8
AC002463.3	cluster_2	No	GO:0046907	BP	intracellular transport	0.00352382	CHM,COPG2,LRPPRC,NUP160,RAB22A,RAB28,WASL	rna_Lung_c9,rna_Lung_c20,rna_Large_Intestine_c8
AC002463.3	cluster_2	No	GO:0051640	BP	organelle localization	0.0460231	CEP83,COPG2,LRPPRC,WASL	rna_Lung_c9,rna_Lung_c20,rna_Large_Intestine_c8
AC002463.3	cluster_2	No	GO:0051641	BP	cellular localization	0.00405541	CEP83,CHM,COPG2,LRPPRC,NUP160,RAB22A,RAB28,WASL,XRCC5	rna_Lung_c9,rna_Lung_c20,rna_Large_Intestine_c8
AC002463.3	cluster_2	No	GO:0051649	BP	establishment of localization in cell	0.00684004	CEP83,CHM,COPG2,LRPPRC,NUP160,RAB22A,RAB28,WASL	rna_Lung_c9,rna_Lung_c20,rna_Large_Intestine_c8
AC002463.3	cluster_2	No	GO:0051656	BP	establishment of organelle localization	0.0220454	CEP83,COPG2,LRPPRC,WASL	rna_Lung_c9,rna_Lung_c20,rna_Large_Intestine_c8
AC002463.3	cluster_2	No	GO:0065003	BP	protein-containing complex assembly	0.0360982	FARSB,FN1,NUBPL,PRKACB,WASL,XRCC5	rna_Lung_c9,rna_Lung_c20,rna_Large_Intestine_c8
AC002463.3	cluster_2	No	GO:0071702	BP	organic substance transport	0.0196663	ATP10A,CHM,COPG2,NUP160,PITPNA,PPARG,RAB22A,RAB28	rna_Lung_c9,rna_Lung_c20,rna_Large_Intestine_c8
AC002463.3	cluster_2	No	GO:1903525	BP	regulation of membrane tubulation	0.0377798	ATP10A,WASL	rna_Lung_c9,rna_Lung_c20,rna_Large_Intestine_c8
AC004156.3	cluster_23	No	GO:0016032	BP	viral process	0.017961	CAV1,MGAT5,ST6GALNAC3,VTA1	atac_Kidney_c12,atac_Lung_c7
AC004156.3	cluster_23	No	GO:0034139	BP	regulation of toll-like receptor 3 signaling pathway	0.0492023	CAV1,TIRAP	atac_Kidney_c12,atac_Lung_c7
AC004156.3	cluster_23	No	GO:0034141	BP	positive regulation of toll-like receptor 3 signaling pathway	0.0492023	CAV1,TIRAP	atac_Kidney_c12,atac_Lung_c7
AC004156.3	cluster_23	No	GO:0045739	BP	positive regulation of DNA repair	0.0352605	HDAC10,RAD51AP1,WDR48	atac_Kidney_c12,atac_Lung_c7
AC004156.3	cluster_23	No	GO:0051054	BP	positive regulation of DNA metabolic process	0.0423654	HDAC10,RAD51AP1,RGCC,WDR48	atac_Kidney_c12,atac_Lung_c7
AC004156.3	cluster_23	No	GO:0080135	BP	regulation of cellular response to stress	0.0423654	CAV1,FMR1,HDAC10,RAD51AP1,TIRAP,WDR48	atac_Kidney_c12,atac_Lung_c7
AC004156.3	cluster_23	No	GO:2001020	BP	regulation of response to DNA damage stimulus	0.0492023	FMR1,HDAC10,RAD51AP1,WDR48	atac_Kidney_c12,atac_Lung_c7
AC004156.3	cluster_23	No	GO:2001022	BP	positive regulation of response to DNA damage stimulus	0.0143406	FMR1,HDAC10,RAD51AP1,WDR48	atac_Kidney_c12,atac_Lung_c7
AC004156.3	cluster_3	No	GO:0010965	BP	regulation of mitotic sister chromatid separation	0.0488568	BUB3,LCMT1,UBE2C	atac_Lung_c22,atac_Kidney_c29,atac_Pancreas_c46,atac_Lung_c43
AC004156.3	cluster_3	No	GO:0022402	BP	cell cycle process	0.0234008	BUB3,KIF2C,LCMT1,PCNT,TPX2,UBE2C	atac_Lung_c22,atac_Kidney_c29,atac_Pancreas_c46,atac_Lung_c43
AC004156.3	cluster_3	No	GO:0030071	BP	regulation of mitotic metaphase/anaphase transition	0.0488568	BUB3,LCMT1,UBE2C	atac_Lung_c22,atac_Kidney_c29,atac_Pancreas_c46,atac_Lung_c43
AC004156.3	cluster_3	No	GO:0033044	BP	regulation of chromosome organization	0.0234008	ACTR5,BUB3,LCMT1,UBE2C	atac_Lung_c22,atac_Kidney_c29,atac_Pancreas_c46,atac_Lung_c43
AC004156.3	cluster_3	No	GO:0033045	BP	regulation of sister chromatid segregation	0.0488568	BUB3,LCMT1,UBE2C	atac_Lung_c22,atac_Kidney_c29,atac_Pancreas_c46,atac_Lung_c43
AC004156.3	cluster_3	No	GO:0051438	BP	regulation of ubiquitin-protein transferase activity	0.0488568	BUB3,UBE2C	atac_Lung_c22,atac_Kidney_c29,atac_Pancreas_c46,atac_Lung_c43
AC004156.3	cluster_3	No	GO:0051983	BP	regulation of chromosome segregation	0.00717032	BUB3,KIF2C,LCMT1,UBE2C	atac_Lung_c22,atac_Kidney_c29,atac_Pancreas_c46,atac_Lung_c43
AC004156.3	cluster_3	No	GO:1902099	BP	regulation of metaphase/anaphase transition of cell cycle	0.0488568	BUB3,LCMT1,UBE2C	atac_Lung_c22,atac_Kidney_c29,atac_Pancreas_c46,atac_Lung_c43
AC004156.3	cluster_3	No	GO:1903047	BP	mitotic cell cycle process	0.00690568	BUB3,KIF2C,LCMT1,PCNT,TPX2,UBE2C	atac_Lung_c22,atac_Kidney_c29,atac_Pancreas_c46,atac_Lung_c43
AC004156.3	cluster_3	No	GO:1905818	BP	regulation of chromosome separation	0.0488568	BUB3,LCMT1,UBE2C	atac_Lung_c22,atac_Kidney_c29,atac_Pancreas_c46,atac_Lung_c43
AC005154.6	cluster_14	No	GO:0003013	BP	circulatory system process	0.00244121	ABCC1,ABCC4,CHRM3,SLC24A3,SLC4A4,ZDHHC21	rna_Lung_c12
AC005154.6	cluster_14	No	GO:0003018	BP	vascular process in circulatory system	0.00068833	ABCC1,ABCC4,CHRM3,SLC24A3,SLC4A4,ZDHHC21	rna_Lung_c12
AC005154.6	cluster_14	No	GO:0003056	BP	regulation of vascular associated smooth muscle contraction	0.0269856	CHRM3,ZDHHC21	rna_Lung_c12
AC005154.6	cluster_14	No	GO:0006139	BP	nucleobase-containing compound metabolic process	0.0331023	CELF2,FARSB,NAMPT,PAPSS2,PPARG,RAD52,SPIN1	rna_Lung_c12
AC005154.6	cluster_14	No	GO:0006612	BP	protein targeting to membrane	0.0269856	CHM,ZDHHC21	rna_Lung_c12
AC005154.6	cluster_14	No	GO:0006793	BP	phosphorus metabolic process	0.0483189	DAPK1,DAPK2,ERBB4,NAMPT,PAPSS2,PITPNM2,PTPRA	rna_Lung_c12
AC005154.6	cluster_14	No	GO:0006796	BP	phosphate-containing compound metabolic process	0.0468156	DAPK1,DAPK2,ERBB4,NAMPT,PAPSS2,PITPNM2,PTPRA	rna_Lung_c12
AC005154.6	cluster_14	No	GO:0006915	BP	apoptotic process	0.0483157	BCL2,DAPK1,DAPK2,NOTCH2	rna_Lung_c12
AC005154.6	cluster_14	No	GO:0009058	BP	biosynthetic process	0.0487998	FARSB,NAMPT,PAPSS2,PITPNM2,PPARG,SPIN1,XYLT1	rna_Lung_c12
AC005154.6	cluster_14	No	GO:0010232	BP	vascular transport	0.00635542	ABCC1,ABCC4,SLC24A3,SLC4A4	rna_Lung_c12
AC005154.6	cluster_14	No	GO:0010506	BP	regulation of autophagy	0.0253298	BCL2,DAPK1,DAPK2,TBC1D14	rna_Lung_c12
AC005154.6	cluster_14	No	GO:0031329	BP	regulation of cellular catabolic process	0.0487998	BCL2,DAPK1,DAPK2,SLC4A4,TBC1D14	rna_Lung_c12
AC005154.6	cluster_14	No	GO:0034599	BP	cellular response to oxidative stress	0.0416282	ABCC1,DAPK1,RAD52	rna_Lung_c12
AC005154.6	cluster_14	No	GO:0035556	BP	intracellular signal transduction	0.0130383	BCL2,CHRM3,DAPK1,DAPK2,GNA13,PITPNM2,RAPGEF6,ZNF385B	rna_Lung_c12
AC005154.6	cluster_14	No	GO:0043085	BP	positive regulation of catalytic activity	0.0452181	ASPH,DAPK1,ERBB4,GNA13,PPARG,RAPGEF6,TBC1D14	rna_Lung_c12
AC005154.6	cluster_14	No	GO:0044249	BP	cellular biosynthetic process	0.0429422	FARSB,NAMPT,PAPSS2,PITPNM2,PPARG,SPIN1,XYLT1	rna_Lung_c12
AC005154.6	cluster_14	No	GO:0051345	BP	positive regulation of hydrolase activity	0.0139735	ASPH,DAPK1,GNA13,PPARG,RAPGEF6,TBC1D14	rna_Lung_c12
AC005154.6	cluster_14	No	GO:0071702	BP	organic substance transport	0.0486217	ABCC1,ABCC4,CHM,COPG2,PPARG,SLC4A4,ZDHHC21	rna_Lung_c12
AC005154.6	cluster_14	No	GO:0071705	BP	nitrogen compound transport	0.0452181	ABCC1,ABCC4,CHM,COPG2,PPARG,ZDHHC21	rna_Lung_c12
AC005154.6	cluster_14	No	GO:0071716	BP	leukotriene transport	0.0138382	ABCC1,ABCC4	rna_Lung_c12
AC005154.6	cluster_14	No	GO:0140115	BP	export across plasma membrane	0.0143696	ABCC1,ABCC4,SLC4A4	rna_Lung_c12
AC005154.6	cluster_14	No	GO:0140352	BP	export from cell	0.0182804	ABCC1,ABCC4,COPG2,SLC4A4,SYT1	rna_Lung_c12
AC005154.6	cluster_14	No	GO:0150104	BP	transport across blood-brain barrier	0.00635542	ABCC1,ABCC4,SLC24A3,SLC4A4	rna_Lung_c12
AC005154.6	cluster_14	No	GO:1901576	BP	organic substance biosynthetic process	0.0452181	FARSB,NAMPT,PAPSS2,PITPNM2,PPARG,SPIN1,XYLT1	rna_Lung_c12
AC005154.6	cluster_14	No	GO:2001056	BP	positive regulation of cysteine-type endopeptidase activity	0.0452181	ASPH,DAPK1,PPARG	rna_Lung_c12
AC005154.6	cluster_8	No	GO:0006473	BP	protein acetylation	0.0186694	EPC1,NAA15,NAA35	rna_Lung_c4,rna_Lung_c1
AC005154.6	cluster_8	No	GO:0006474	BP	N-terminal protein amino acid acetylation	0.0110705	NAA15,NAA35	rna_Lung_c4,rna_Lung_c1
AC005154.6	cluster_8	No	GO:0008104	BP	protein localization	0.0186694	ARFIP1,CEP83,INVS,RAB28,RAPGEF6,YWHAZ,ZDHHC21	rna_Lung_c4,rna_Lung_c1
AC005154.6	cluster_8	No	GO:0010970	BP	transport along microtubule	0.0240417	IFT74,LRPPRC,SPG11	rna_Lung_c4,rna_Lung_c1
AC005154.6	cluster_8	No	GO:0016572	BP	histone phosphorylation	0.0240417	BAZ1B,RPS6KA5	rna_Lung_c4,rna_Lung_c1
AC005154.6	cluster_8	No	GO:0018193	BP	peptidyl-amino acid modification	0.0116551	AGBL4,CIT,EPC1,NAA15,RPS6KA5,ZDHHC21	rna_Lung_c4,rna_Lung_c1
AC005154.6	cluster_8	No	GO:0030030	BP	cell projection organization	0.0085731	CEP83,IFT74,IQCB1,ITGB1,RAPGEF6,WASL	rna_Lung_c4,rna_Lung_c1
AC005154.6	cluster_8	No	GO:0030031	BP	cell projection assembly	0.00223704	CEP83,IFT74,IQCB1,ITGB1,RAPGEF6	rna_Lung_c4,rna_Lung_c1
AC005154.6	cluster_8	No	GO:0030705	BP	cytoskeleton-dependent intracellular transport	0.00499354	IFT74,LRPPRC,SPG11,WASL	rna_Lung_c4,rna_Lung_c1
AC005154.6	cluster_8	No	GO:0031365	BP	N-terminal protein amino acid modification	0.0110705	NAA15,NAA35	rna_Lung_c4,rna_Lung_c1
AC005154.6	cluster_8	No	GO:0033036	BP	macromolecule localization	0.0189669	ARFIP1,CEP83,INVS,RAB28,RAPGEF6,YWHAZ,ZDHHC21	rna_Lung_c4,rna_Lung_c1
AC005154.6	cluster_8	No	GO:0043543	BP	protein acylation	0.00142558	EPC1,NAA15,NAA35,ZDHHC21	rna_Lung_c4,rna_Lung_c1
AC005154.6	cluster_8	No	GO:0044088	BP	regulation of vacuole organization	0.041949	FEZ2,TBC1D14	rna_Lung_c4,rna_Lung_c1
AC005154.6	cluster_8	No	GO:0046907	BP	intracellular transport	0.000344156	ARFIP1,IFT74,LRPPRC,RAB28,SPG11,TBC1D14,WASL,ZDHHC21	rna_Lung_c4,rna_Lung_c1
AC005154.6	cluster_8	No	GO:0051402	BP	neuron apoptotic process	0.0240417	CIT,ERBB3	rna_Lung_c4,rna_Lung_c1
AC005154.6	cluster_8	No	GO:0051640	BP	organelle localization	0.000340728	CEP83,ITGB1,LRPPRC,SPG11,WASL,YWHAZ	rna_Lung_c4,rna_Lung_c1
AC005154.6	cluster_8	No	GO:0051641	BP	cellular localization	2.71313e-06	ARFIP1,CEP83,IFT74,INVS,ITGB1,LRPPRC,RAB28,RAPGEF6,SPG11,TBC1D14,WASL,YWHAZ,ZDHHC21	rna_Lung_c4,rna_Lung_c1
AC005154.6	cluster_8	No	GO:0051649	BP	establishment of localization in cell	1.92489e-05	ARFIP1,CEP83,IFT74,ITGB1,LRPPRC,RAB28,SPG11,TBC1D14,WASL,YWHAZ,ZDHHC21	rna_Lung_c4,rna_Lung_c1
AC005154.6	cluster_8	No	GO:0051656	BP	establishment of organelle localization	8.4207e-05	CEP83,ITGB1,LRPPRC,SPG11,WASL,YWHAZ	rna_Lung_c4,rna_Lung_c1
AC005154.6	cluster_8	No	GO:0070997	BP	neuron death	0.0240417	CIT,ERBB3	rna_Lung_c4,rna_Lung_c1
AC005154.6	cluster_8	No	GO:0099111	BP	microtubule-based transport	0.0408979	IFT74,LRPPRC,SPG11	rna_Lung_c4,rna_Lung_c1
AC005154.6	cluster_8	No	GO:0120031	BP	plasma membrane bounded cell projection assembly	0.00143162	CEP83,IFT74,IQCB1,ITGB1,RAPGEF6	rna_Lung_c4,rna_Lung_c1
AC005154.6	cluster_8	No	GO:0120036	BP	plasma membrane bounded cell projection organization	0.00338893	CEP83,IFT74,IQCB1,ITGB1,RAPGEF6,WASL	rna_Lung_c4,rna_Lung_c1
AC005154.6	cluster_8	No	GO:1990164	BP	histone H2A phosphorylation	0.0110705	BAZ1B,RPS6KA5	rna_Lung_c4,rna_Lung_c1
AC005154.6	cluster_8	No	GO:2000369	BP	regulation of clathrin-dependent endocytosis	0.0240417	SMAP1,WASL	rna_Lung_c4,rna_Lung_c1
AC005154.6	cluster_8	No	GO:2000785	BP	regulation of autophagosome assembly	0.041949	FEZ2,TBC1D14	rna_Lung_c4,rna_Lung_c1
AC006994.4	cluster_12	No	GO:0002181	BP	cytoplasmic translation	0.0203646	DRG1,RPL4,RPS27	atac_Liver_c3,atac_Heart_c14,atac_Lung_c23,atac_Heart_c15
AC006994.4	cluster_12	No	GO:0006139	BP	nucleobase-containing compound metabolic process	0.0179491	CTR9,DDX21,DRG1,PIAS4,POP1,RAN,RPS27,WDR48	atac_Liver_c3,atac_Heart_c14,atac_Lung_c23,atac_Heart_c15
AC006994.4	cluster_12	No	GO:0006412	BP	translation	0.0416132	DRG1,RPL4,RPS27	atac_Liver_c3,atac_Heart_c14,atac_Lung_c23,atac_Heart_c15
AC006994.4	cluster_12	No	GO:0006518	BP	peptide metabolic process	0.0416132	CTSL,DRG1,RPL4,RPS27	atac_Liver_c3,atac_Heart_c14,atac_Lung_c23,atac_Heart_c15
AC006994.4	cluster_12	No	GO:0006892	BP	post-Golgi vesicle-mediated transport	0.0272173	BLZF1,EXOC1,MON2	atac_Liver_c3,atac_Heart_c14,atac_Lung_c23,atac_Heart_c15
AC006994.4	cluster_12	No	GO:0009059	BP	macromolecule biosynthetic process	0.0416132	CTR9,DDX21,DRG1,RPL4,RPS27	atac_Liver_c3,atac_Heart_c14,atac_Lung_c23,atac_Heart_c15
AC006994.4	cluster_12	No	GO:0016192	BP	vesicle-mediated transport	0.0241718	ARL4A,BLZF1,CTSL,DNAJC13,EXOC1,MON2,VTA1	atac_Liver_c3,atac_Heart_c14,atac_Lung_c23,atac_Heart_c15
AC006994.4	cluster_12	No	GO:0044271	BP	cellular nitrogen compound biosynthetic process	0.0241718	CTR9,DDX21,DRG1,FLVCR1,RPL4,RPS27	atac_Liver_c3,atac_Heart_c14,atac_Lung_c23,atac_Heart_c15
AC006994.4	cluster_12	No	GO:0046907	BP	intracellular transport	0.0272173	ARL4A,FAM91A1,FLVCR1,MON2,RAN,VTA1	atac_Liver_c3,atac_Heart_c14,atac_Lung_c23,atac_Heart_c15
AC006994.4	cluster_12	No	GO:0051641	BP	cellular localization	0.0259082	ARL4A,BLZF1,EXOC1,FAM91A1,FLVCR1,MON2,RAN,VTA1	atac_Liver_c3,atac_Heart_c14,atac_Lung_c23,atac_Heart_c15
AC006994.4	cluster_12	No	GO:0090304	BP	nucleic acid metabolic process	0.00611773	CTR9,DDX21,DRG1,PIAS4,POP1,RAN,RPS27,WDR48	atac_Liver_c3,atac_Heart_c14,atac_Lung_c23,atac_Heart_c15
AC006994.4	cluster_12	No	GO:1903322	BP	positive regulation of protein modification by small protein conjugation or removal	0.0179491	CTR9,PIAS4,WDR48	atac_Liver_c3,atac_Heart_c14,atac_Lung_c23,atac_Heart_c15
AC006994.4	cluster_17	No	GO:0003007	BP	heart morphogenesis	0.0381058	DLC1,INSR	rna_Lung_c5,rna_Lung_c4,rna_Lung_c1
AC006994.4	cluster_17	No	GO:0006140	BP	regulation of nucleotide metabolic process	0.0182223	INSR,PID1,SLC4A4	rna_Lung_c5,rna_Lung_c4,rna_Lung_c1
AC006994.4	cluster_17	No	GO:0007010	BP	cytoskeleton organization	0.0217831	DLC1,DMD,GAB1,PRKG1,TACC2,TTN	rna_Lung_c5,rna_Lung_c4,rna_Lung_c1
AC006994.4	cluster_17	No	GO:0009653	BP	anatomical structure morphogenesis	0.0147751	ANK3,CNTN4,DLC1,ERBB4,INSR,NTN4,PID1,TTN	rna_Lung_c5,rna_Lung_c4,rna_Lung_c1
AC006994.4	cluster_17	No	GO:0010562	BP	positive regulation of phosphorus metabolic process	0.0250381	DLC1,ERBB4,INSR,LIMCH1,MAGI2,PID1,SLC4A4	rna_Lung_c5,rna_Lung_c4,rna_Lung_c1
AC006994.4	cluster_17	No	GO:0030029	BP	actin filament-based process	0.00107061	DLC1,DMD,GAB1,LIMCH1,PRKG1,TTN	rna_Lung_c5,rna_Lung_c4,rna_Lung_c1
AC006994.4	cluster_17	No	GO:0030036	BP	actin cytoskeleton organization	0.00613092	DLC1,DMD,GAB1,PRKG1,TTN	rna_Lung_c5,rna_Lung_c4,rna_Lung_c1
AC006994.4	cluster_17	No	GO:0030334	BP	regulation of cell migration	0.0380657	DLC1,ERBB4,GAB1,INSR,LIMCH1,MAGI2,PRKG1	rna_Lung_c5,rna_Lung_c4,rna_Lung_c1
AC006994.4	cluster_17	No	GO:0033194	BP	response to hydroperoxide	0.0381058	DAPK1,MGST1	rna_Lung_c5,rna_Lung_c4,rna_Lung_c1
AC006994.4	cluster_17	No	GO:0034110	BP	regulation of homotypic cell-cell adhesion	0.0122946	ANK3,PRKCQ,PRKG1	rna_Lung_c5,rna_Lung_c4,rna_Lung_c1
AC006994.4	cluster_17	No	GO:0034762	BP	regulation of transmembrane transport	0.0381058	ANK3,DAPK1,DMD,INSR,PID1	rna_Lung_c5,rna_Lung_c4,rna_Lung_c1
AC006994.4	cluster_17	No	GO:0040012	BP	regulation of locomotion	0.0445438	DLC1,ERBB4,GAB1,INSR,LIMCH1,MAGI2,PRKG1	rna_Lung_c5,rna_Lung_c4,rna_Lung_c1
AC006994.4	cluster_17	No	GO:0043085	BP	positive regulation of catalytic activity	0.0401938	ASPH,DAPK1,DLC1,ERBB4,INSR,MAGI2,PRKCQ	rna_Lung_c5,rna_Lung_c4,rna_Lung_c1
AC006994.4	cluster_17	No	GO:0043467	BP	regulation of generation of precursor metabolites and energy	0.0182223	INSR,PRDM16,SLC4A4	rna_Lung_c5,rna_Lung_c4,rna_Lung_c1
AC006994.4	cluster_17	No	GO:0045821	BP	positive regulation of glycolytic process	0.0381058	INSR,SLC4A4	rna_Lung_c5,rna_Lung_c4,rna_Lung_c1
AC006994.4	cluster_17	No	GO:0045937	BP	positive regulation of phosphate metabolic process	0.0250381	DLC1,ERBB4,INSR,LIMCH1,MAGI2,PID1,SLC4A4	rna_Lung_c5,rna_Lung_c4,rna_Lung_c1
AC006994.4	cluster_17	No	GO:0045981	BP	positive regulation of nucleotide metabolic process	0.00761475	INSR,PID1,SLC4A4	rna_Lung_c5,rna_Lung_c4,rna_Lung_c1
AC006994.4	cluster_17	No	GO:0046627	BP	negative regulation of insulin receptor signaling pathway	0.0381058	PID1,PRKCQ	rna_Lung_c5,rna_Lung_c4,rna_Lung_c1
AC006994.4	cluster_17	No	GO:0062012	BP	regulation of small molecule metabolic process	0.0381058	ACADL,INSR,PID1,SLC4A4	rna_Lung_c5,rna_Lung_c4,rna_Lung_c1
AC006994.4	cluster_17	No	GO:0071310	BP	cellular response to organic substance	0.0124473	COLEC12,DAPK1,INSR,MAGI2,MGST1,PID1,SOX5,ZFAND6	rna_Lung_c5,rna_Lung_c4,rna_Lung_c1
AC006994.4	cluster_17	No	GO:0071447	BP	cellular response to hydroperoxide	0.0119681	DAPK1,MGST1	rna_Lung_c5,rna_Lung_c4,rna_Lung_c1
AC006994.4	cluster_17	No	GO:1900077	BP	negative regulation of cellular response to insulin stimulus	0.0381058	PID1,PRKCQ	rna_Lung_c5,rna_Lung_c4,rna_Lung_c1
AC006994.4	cluster_17	No	GO:1900542	BP	regulation of purine nucleotide metabolic process	0.0182223	INSR,PID1,SLC4A4	rna_Lung_c5,rna_Lung_c4,rna_Lung_c1
AC006994.4	cluster_17	No	GO:1900544	BP	positive regulation of purine nucleotide metabolic process	0.00761475	INSR,PID1,SLC4A4	rna_Lung_c5,rna_Lung_c4,rna_Lung_c1
AC006994.4	cluster_17	No	GO:1903578	BP	regulation of ATP metabolic process	0.0122946	INSR,PID1,SLC4A4	rna_Lung_c5,rna_Lung_c4,rna_Lung_c1
AC006994.4	cluster_17	No	GO:1903580	BP	positive regulation of ATP metabolic process	0.00761475	INSR,PID1,SLC4A4	rna_Lung_c5,rna_Lung_c4,rna_Lung_c1
AC006994.4	cluster_17	No	GO:2000145	BP	regulation of cell motility	0.0381058	DLC1,ERBB4,GAB1,INSR,LIMCH1,MAGI2,PRKG1	rna_Lung_c5,rna_Lung_c4,rna_Lung_c1
AC006994.4	cluster_17	No	GO:2000651	BP	positive regulation of sodium ion transmembrane transporter activity	0.0381058	ANK3,DMD	rna_Lung_c5,rna_Lung_c4,rna_Lung_c1
AC006994.4	cluster_17	No	GO:2001056	BP	positive regulation of cysteine-type endopeptidase activity	0.038791	ASPH,DAPK1,DLC1	rna_Lung_c5,rna_Lung_c4,rna_Lung_c1
AC007246.3	cluster_16	No	GO:0003013	BP	circulatory system process	0.018102	ABCC1,ABCC4,CHRM3,SLC24A3,SLC4A4	rna_Lung_c12
AC007246.3	cluster_16	No	GO:0003018	BP	vascular process in circulatory system	0.00951747	ABCC1,ABCC4,CHRM3,SLC24A3,SLC4A4	rna_Lung_c12
AC007246.3	cluster_16	No	GO:0006082	BP	organic acid metabolic process	0.046664	ABCC1,CYP3A5,FARSB,PAPSS2,PPARG	rna_Lung_c12
AC007246.3	cluster_16	No	GO:0006796	BP	phosphate-containing compound metabolic process	0.049045	CIT,DAPK1,DAPK2,ERBB4,PAPSS2,PITPNM2,TAMM41	rna_Lung_c12
AC007246.3	cluster_16	No	GO:0006885	BP	regulation of pH	0.046664	BCL2,CFTR,SLC4A4	rna_Lung_c12
AC007246.3	cluster_16	No	GO:0008104	BP	protein localization	0.0237599	CACNB2,CHM,COPG2,PPARG,RAPGEF6,SYNRG,VPS41	rna_Lung_c12
AC007246.3	cluster_16	No	GO:0010232	BP	vascular transport	0.00735891	ABCC1,ABCC4,SLC24A3,SLC4A4	rna_Lung_c12
AC007246.3	cluster_16	No	GO:0015031	BP	protein transport	0.0345384	CHM,COPG2,PPARG,SYNRG,VPS41	rna_Lung_c12
AC007246.3	cluster_16	No	GO:0022898	BP	regulation of transmembrane transporter activity	0.0108361	BCL2,CACNB2,CFTR,CHRM3,DAPK1	rna_Lung_c12
AC007246.3	cluster_16	No	GO:0030641	BP	regulation of cellular pH	0.0415207	BCL2,CFTR,SLC4A4	rna_Lung_c12
AC007246.3	cluster_16	No	GO:0032409	BP	regulation of transporter activity	0.00201039	BCL2,CACNB2,CFTR,CHRM3,DAPK1,PPARG	rna_Lung_c12
AC007246.3	cluster_16	No	GO:0033036	BP	macromolecule localization	0.0240931	CACNB2,CHM,COPG2,PPARG,RAPGEF6,SYNRG,VPS41	rna_Lung_c12
AC007246.3	cluster_16	No	GO:0033554	BP	cellular response to stress	0.0131446	ABCC1,BCL2,CFTR,DAPK1,PPARG,RAD52,VPS41	rna_Lung_c12
AC007246.3	cluster_16	No	GO:0034135	BP	regulation of toll-like receptor 2 signaling pathway	0.046664	MFHAS1,PJA2	rna_Lung_c12
AC007246.3	cluster_16	No	GO:0034137	BP	positive regulation of toll-like receptor 2 signaling pathway	0.0300521	MFHAS1,PJA2	rna_Lung_c12
AC007246.3	cluster_16	No	GO:0034599	BP	cellular response to oxidative stress	0.0466236	ABCC1,DAPK1,RAD52	rna_Lung_c12
AC007246.3	cluster_16	No	GO:0034762	BP	regulation of transmembrane transport	0.046664	BCL2,CACNB2,CFTR,CHRM3,DAPK1	rna_Lung_c12
AC007246.3	cluster_16	No	GO:0035556	BP	intracellular signal transduction	0.046664	BCL2,CHRM3,DAPK1,DAPK2,PITPNM2,RAPGEF6,ZNF385B	rna_Lung_c12
AC007246.3	cluster_16	No	GO:0043436	BP	oxoacid metabolic process	0.0415207	ABCC1,CYP3A5,FARSB,PAPSS2,PPARG	rna_Lung_c12
AC007246.3	cluster_16	No	GO:0045184	BP	establishment of protein localization	0.0458148	CHM,COPG2,PPARG,SYNRG,VPS41	rna_Lung_c12
AC007246.3	cluster_16	No	GO:0045852	BP	pH elevation	0.046664	BCL2,CFTR	rna_Lung_c12
AC007246.3	cluster_16	No	GO:0046907	BP	intracellular transport	0.0197944	CHM,COPG2,NUP160,SYNRG,VPS41,WASL	rna_Lung_c12
AC007246.3	cluster_16	No	GO:0051402	BP	neuron apoptotic process	0.0300521	BCL2,CIT	rna_Lung_c12
AC007246.3	cluster_16	No	GO:0051453	BP	regulation of intracellular pH	0.0300521	BCL2,CFTR,SLC4A4	rna_Lung_c12
AC007246.3	cluster_16	No	GO:0051454	BP	intracellular pH elevation	0.046664	BCL2,CFTR	rna_Lung_c12
AC007246.3	cluster_16	No	GO:0051641	BP	cellular localization	0.018102	CACNB2,CHM,COPG2,NUP160,RAPGEF6,SYNRG,VPS41,WASL	rna_Lung_c12
AC007246.3	cluster_16	No	GO:0051649	BP	establishment of localization in cell	0.0287113	ABCC4,CHM,COPG2,NUP160,SYNRG,VPS41,WASL	rna_Lung_c12
AC007246.3	cluster_16	No	GO:0070997	BP	neuron death	0.0300521	BCL2,CIT	rna_Lung_c12
AC007246.3	cluster_16	No	GO:0071702	BP	organic substance transport	0.00135303	ABCC1,ABCC4,CFTR,CHM,COPG2,NUP160,PPARG,SLC4A4,SYNRG,VPS41	rna_Lung_c12
AC007246.3	cluster_16	No	GO:0071705	BP	nitrogen compound transport	0.00227564	ABCC1,ABCC4,CHM,COPG2,NUP160,PPARG,SYNRG,VPS41	rna_Lung_c12
AC007246.3	cluster_16	No	GO:0071716	BP	leukotriene transport	0.0164008	ABCC1,ABCC4	rna_Lung_c12
AC007246.3	cluster_16	No	GO:0140115	BP	export across plasma membrane	0.0174489	ABCC1,ABCC4,SLC4A4	rna_Lung_c12
AC007246.3	cluster_16	No	GO:0150104	BP	transport across blood-brain barrier	0.00735891	ABCC1,ABCC4,SLC24A3,SLC4A4	rna_Lung_c12
AC007246.3	cluster_7	No	GO:0001505	BP	regulation of neurotransmitter levels	0.0161965	LIN7A,MCTP1,NLGN1,SYN3	rna_Lung_c3,rna_Large_Intestine_c11
AC007246.3	cluster_7	No	GO:0007156	BP	homophilic cell adhesion via plasma membrane adhesion molecules	0.0114221	CADM1,CNTN6,NEXN,ROBO1	rna_Lung_c3,rna_Large_Intestine_c11
AC007246.3	cluster_7	No	GO:0008037	BP	cell recognition	0.0292832	CADM1,CNTN6,COLEC12,NEXN,ROBO1	rna_Lung_c3,rna_Large_Intestine_c11
AC007246.3	cluster_7	No	GO:0008038	BP	neuron recognition	0.0261945	CNTN6,NEXN,ROBO1	rna_Lung_c3,rna_Large_Intestine_c11
AC007246.3	cluster_7	No	GO:0009653	BP	anatomical structure morphogenesis	0.00134811	AFF3,ANK3,CCBE1,CTNND2,ERBB4,NLGN1,PID1,ROBO1,SFTPB,TTN	rna_Lung_c3,rna_Large_Intestine_c11
AC007246.3	cluster_7	No	GO:0010035	BP	response to inorganic substance	0.0291539	ANK3,DLG2,HOMER1,NLGN1,TTN	rna_Lung_c3,rna_Large_Intestine_c11
AC007246.3	cluster_7	No	GO:0010038	BP	response to metal ion	0.0134971	ANK3,DLG2,HOMER1,NLGN1,TTN	rna_Lung_c3,rna_Large_Intestine_c11
AC007246.3	cluster_7	No	GO:0032228	BP	regulation of synaptic transmission, GABAergic	0.0347972	NLGN1,SYN3	rna_Lung_c3,rna_Large_Intestine_c11
AC007246.3	cluster_7	No	GO:0032989	BP	cellular component morphogenesis	0.0215004	ANK3,CTNND2,NLGN1,PID1	rna_Lung_c3,rna_Large_Intestine_c11
AC007246.3	cluster_7	No	GO:0032990	BP	cell part morphogenesis	0.0215004	ANK3,CTNND2,NLGN1,PID1	rna_Lung_c3,rna_Large_Intestine_c11
AC007246.3	cluster_7	No	GO:0035023	BP	regulation of Rho protein signal transduction	0.040891	ARRB1,HEG1,ROBO1	rna_Lung_c3,rna_Large_Intestine_c11
AC007246.3	cluster_7	No	GO:0043113	BP	receptor clustering	0.0174489	DLG2,NLGN1,PIGR	rna_Lung_c3,rna_Large_Intestine_c11
AC007246.3	cluster_7	No	GO:0048731	BP	system development	0.040891	ALPL,CNTN6,ERBB4,FEZ2,NLGN1,ROBO1	rna_Lung_c3,rna_Large_Intestine_c11
AC007246.3	cluster_7	No	GO:0051668	BP	localization within membrane	0.0161965	ANK3,DLG2,LIN7A,NLGN1,PIGR	rna_Lung_c3,rna_Large_Intestine_c11
AC007246.3	cluster_7	No	GO:0072657	BP	protein localization to membrane	0.0111078	ANK3,DLG2,LIN7A,NLGN1,PIGR	rna_Lung_c3,rna_Large_Intestine_c11
AC007246.3	cluster_7	No	GO:0098609	BP	cell-cell adhesion	0.0111078	CADM1,CNTN6,CTNND2,DLG2,NEXN,NLGN1,ROBO1	rna_Lung_c3,rna_Large_Intestine_c11
AC007246.3	cluster_7	No	GO:0098742	BP	cell-cell adhesion via plasma-membrane adhesion molecules	0.0215004	CADM1,CNTN6,NEXN,NLGN1,ROBO1	rna_Lung_c3,rna_Large_Intestine_c11
AC007246.3	cluster_7	No	GO:0120035	BP	regulation of plasma membrane bounded cell projection organization	0.0486096	HOMER1,MYO10,NLGN1,ROBO1,TOX	rna_Lung_c3,rna_Large_Intestine_c11
AC007246.3	cluster_7	No	GO:1900748	BP	positive regulation of vascular endothelial growth factor signaling pathway	0.0347972	CCBE1,ROBO1	rna_Lung_c3,rna_Large_Intestine_c11
AC007246.3	cluster_7	No	GO:1902414	BP	protein localization to cell junction	0.0114221	DLG2,HEG1,NLGN1	rna_Lung_c3,rna_Large_Intestine_c11
AC104820.2	cluster_2	No	GO:0001932	BP	regulation of protein phosphorylation	0.0381461	EGR1,LATS1,PIK3R5,PRNP,RGCC,TFRC,UBASH3B	rna_Large_Intestine_c18
AC104820.2	cluster_2	No	GO:0001934	BP	positive regulation of protein phosphorylation	0.0456516	EGR1,LATS1,PIK3R5,PRNP,RGCC,TFRC	rna_Large_Intestine_c18
AC104820.2	cluster_2	No	GO:0006793	BP	phosphorus metabolic process	0.00196107	BAZ1B,CSGALNACT1,ITPKB,LATS1,PRKACB,PTPN4,TXK,UAP1,UBASH3B	rna_Large_Intestine_c18
AC104820.2	cluster_2	No	GO:0006796	BP	phosphate-containing compound metabolic process	0.0381461	BAZ1B,ITPKB,LATS1,PRKACB,PTPN4,TXK,UBASH3B	rna_Large_Intestine_c18
AC104820.2	cluster_2	No	GO:0006886	BP	intracellular protein transport	0.0340371	NUP214,RAB28,RAB31,RGPD2	rna_Large_Intestine_c18
AC104820.2	cluster_2	No	GO:0009225	BP	nucleotide-sugar metabolic process	0.0204995	CSGALNACT1,UAP1	rna_Large_Intestine_c18
AC104820.2	cluster_2	No	GO:0015031	BP	protein transport	0.0225251	NUP214,RAB28,RAB31,RGPD2,TFRC	rna_Large_Intestine_c18
AC104820.2	cluster_2	No	GO:0030155	BP	regulation of cell adhesion	0.0456516	ETS1,PDE3B,PRNP,RGCC,TFRC,YTHDF2	rna_Large_Intestine_c18
AC104820.2	cluster_2	No	GO:0031401	BP	positive regulation of protein modification process	0.0197635	EGR1,LATS1,PIK3R5,PRNP,RGCC,SAP30BP,TFRC	rna_Large_Intestine_c18
AC104820.2	cluster_2	No	GO:0035556	BP	intracellular signal transduction	0.00182227	GRAP2,LATS1,NFATC2,NLRC5,PIK3R5,PRKACB,PRNP,TEX14,TFRC	rna_Large_Intestine_c18
AC104820.2	cluster_2	No	GO:0043549	BP	regulation of kinase activity	0.0052485	EGR1,LATS1,NLRC5,PIK3R5,PRNP,RGCC,UBASH3B	rna_Large_Intestine_c18
AC104820.2	cluster_2	No	GO:0045184	BP	establishment of protein localization	0.0307524	NUP214,RAB28,RAB31,RGPD2,TFRC	rna_Large_Intestine_c18
AC104820.2	cluster_2	No	GO:0045786	BP	negative regulation of cell cycle	0.0186566	BAZ1B,LATS1,RGCC,TEX14	rna_Large_Intestine_c18
AC104820.2	cluster_2	No	GO:0045859	BP	regulation of protein kinase activity	0.0161884	EGR1,LATS1,PIK3R5,PRNP,RGCC,UBASH3B	rna_Large_Intestine_c18
AC104820.2	cluster_2	No	GO:0045944	BP	positive regulation of transcription by RNA polymerase II	0.00246484	EGR1,ETS1,GABPB1,NLRC5,RGCC,TFEC,TRERF1,TXK	rna_Large_Intestine_c18
AC104820.2	cluster_2	No	GO:0050776	BP	regulation of immune response	0.035441	NFATC2,NLRC5,PRNP,RGCC,TFRC,TXK,YTHDF2	rna_Large_Intestine_c18
AC104820.2	cluster_2	No	GO:0051338	BP	regulation of transferase activity	0.00893749	EGR1,LATS1,NLRC5,PIK3R5,PRNP,RGCC,UBASH3B	rna_Large_Intestine_c18
AC104820.2	cluster_2	No	GO:0060332	BP	positive regulation of response to interferon-gamma	0.00942172	NLRC5,TXK	rna_Large_Intestine_c18
AC104820.2	cluster_2	No	GO:0060335	BP	positive regulation of interferon-gamma-mediated signaling pathway	0.00942172	NLRC5,TXK	rna_Large_Intestine_c18
AC104820.2	cluster_2	No	GO:0060338	BP	regulation of type I interferon-mediated signaling pathway	0.0490655	NLRC5,YTHDF2	rna_Large_Intestine_c18
AC104820.2	cluster_2	No	GO:0060339	BP	negative regulation of type I interferon-mediated signaling pathway	0.0345015	NLRC5,YTHDF2	rna_Large_Intestine_c18
AC104820.2	cluster_2	No	GO:0071417	BP	cellular response to organonitrogen compound	0.0292862	EGR1,PDE3B,PRNP,RAB31	rna_Large_Intestine_c18
AC104820.2	cluster_2	No	GO:0071495	BP	cellular response to endogenous stimulus	0.04174	EGR1,PDE3B,PRNP,RAB31,TRERF1	rna_Large_Intestine_c18
AC104820.2	cluster_2	No	GO:1901699	BP	cellular response to nitrogen compound	0.04174	EGR1,PDE3B,PRNP,RAB31	rna_Large_Intestine_c18
AC104820.2	cluster_2	No	GO:1902950	BP	regulation of dendritic spine maintenance	0.0490655	HOMER1,PRNP	rna_Large_Intestine_c18
AC104820.2	cluster_4	No	GO:0001775	BP	cell activation	0.0348498	CCL5,CD8A,ITGB1,PIK3CD,SLAMF1,TOX	rna_Lymph_Node_c3
AC104820.2	cluster_4	No	GO:0001779	BP	natural killer cell differentiation	0.0367304	PIK3CD,TOX	rna_Lymph_Node_c3
AC104820.2	cluster_4	No	GO:0030098	BP	lymphocyte differentiation	0.0367304	CD8A,ITGB1,PIK3CD,TOX	rna_Lymph_Node_c3
AC104820.2	cluster_4	No	GO:0043547	BP	positive regulation of GTPase activity	0.044843	BCAS3,CCL5,ITGB1,RASGRF2	rna_Lymph_Node_c3
AC104820.2	cluster_4	No	GO:0045321	BP	leukocyte activation	0.0201833	CCL5,CD8A,ITGB1,PIK3CD,SLAMF1,TOX	rna_Lymph_Node_c3
AC104820.2	cluster_4	No	GO:0051336	BP	regulation of hydrolase activity	0.0274206	BCAS3,CCL5,ITGB1,RASGRF2,RPS6KA3,SORL1,TXK	rna_Lymph_Node_c3
AC104820.2	cluster_4	No	GO:1903961	BP	positive regulation of anion transmembrane transport	0.0367304	ABCB1,ITGB1	rna_Lymph_Node_c3
AC159540.1	cluster_2	No	GO:0001775	BP	cell activation	0.00707229	ANXA1,BATF,CD28,CD7,CD8A,SLA2,SLAMF1	rna_Large_Intestine_c14
AC159540.1	cluster_2	No	GO:0002684	BP	positive regulation of immune system process	0.0324891	ANXA1,CD28,CD8A,ICOS,LIME1,SLA2,TRAT1,XRCC5	rna_Large_Intestine_c14
AC159540.1	cluster_2	No	GO:0010165	BP	response to X-ray	0.0221411	ANXA1,XRCC5	rna_Large_Intestine_c14
AC159540.1	cluster_2	No	GO:0030217	BP	T cell differentiation	0.0087387	ANXA1,BATF,CD28,CD8A	rna_Large_Intestine_c14
AC159540.1	cluster_2	No	GO:0042110	BP	T cell activation	0.00130269	ANXA1,BATF,CD28,CD7,CD8A,SLA2	rna_Large_Intestine_c14
AC159540.1	cluster_2	No	GO:0045321	BP	leukocyte activation	0.00322434	ANXA1,BATF,CD28,CD7,CD8A,SLA2,SLAMF1	rna_Large_Intestine_c14
AC159540.1	cluster_2	No	GO:0046649	BP	lymphocyte activation	0.00461653	ANXA1,BATF,CD28,CD7,CD8A,SLA2	rna_Large_Intestine_c14
AC159540.1	cluster_2	No	GO:0050778	BP	positive regulation of immune response	0.0211677	ANXA1,CD28,CD8A,LIME1,SLA2,TRAT1,XRCC5	rna_Large_Intestine_c14
AC159540.1	cluster_6	No	GO:0006139	BP	nucleobase-containing compound metabolic process	4.14686e-05	ACSM3,GTF2A1,HMGCS1,NAMPT,NSUN5P1,PCID2,PPP2R1A,PURA,RAD17,RAD54B,YTHDF2	rna_Kidney_c27
AC159540.1	cluster_6	No	GO:0006720	BP	isoprenoid metabolic process	0.0324048	AKR1B1,HMGCS1,RARRES2	rna_Kidney_c27
AC159540.1	cluster_6	No	GO:0006721	BP	terpenoid metabolic process	0.02686	AKR1B1,HMGCS1,RARRES2	rna_Kidney_c27
AC159540.1	cluster_6	No	GO:0006790	BP	sulfur compound metabolic process	0.0208875	ACSM3,CHST3,GSTM5,HMGCS1	rna_Kidney_c27
AC159540.1	cluster_6	No	GO:0009058	BP	biosynthetic process	0.02686	ACSM3,AKR1B1,CHST3,FLVCR1,GTF2A1,HMGCS1,NAMPT,PCID2	rna_Kidney_c27
AC159540.1	cluster_6	No	GO:0044249	BP	cellular biosynthetic process	0.0208875	ACSM3,AKR1B1,CHST3,FLVCR1,GTF2A1,HMGCS1,NAMPT,PCID2	rna_Kidney_c27
AC159540.1	cluster_6	No	GO:0044255	BP	cellular lipid metabolic process	0.0477853	ACADL,ACSM3,AKR1B1,HMGCS1,PPP2R1A,RARRES2	rna_Kidney_c27
AC159540.1	cluster_6	No	GO:0090304	BP	nucleic acid metabolic process	0.00305886	GTF2A1,NSUN5P1,PCID2,PPP2R1A,PURA,RAD17,RAD54B,YTHDF2	rna_Kidney_c27
AC159540.1	cluster_6	No	GO:1901362	BP	organic cyclic compound biosynthetic process	0.0151853	AKR1B1,FLVCR1,GTF2A1,HMGCS1,NAMPT,PCID2	rna_Kidney_c27
AC159540.1	cluster_6	No	GO:1901576	BP	organic substance biosynthetic process	0.023917	ACSM3,AKR1B1,CHST3,FLVCR1,GTF2A1,HMGCS1,NAMPT,PCID2	rna_Kidney_c27
AC159540.2	cluster_6	No	GO:0001932	BP	regulation of protein phosphorylation	0.049836	BMP6,EGR1,LATS1,PIK3R5,PRNP,RPTOR,UBASH3B	rna_Large_Intestine_c18,rna_Thymus_c15
AC159540.2	cluster_6	No	GO:0006359	BP	regulation of transcription by RNA polymerase III	0.0431526	BAZ1B,RPTOR	rna_Large_Intestine_c18,rna_Thymus_c15
AC159540.2	cluster_6	No	GO:0006793	BP	phosphorus metabolic process	0.0121423	ACSL3,BAZ1B,ITPKB,LATS1,PTPN4,RPTOR,TXK,UBASH3B	rna_Large_Intestine_c18,rna_Thymus_c15
AC159540.2	cluster_6	No	GO:0006796	BP	phosphate-containing compound metabolic process	0.0116532	ACSL3,BAZ1B,ITPKB,LATS1,PTPN4,RPTOR,TXK,UBASH3B	rna_Large_Intestine_c18,rna_Thymus_c15
AC159540.2	cluster_6	No	GO:0010562	BP	positive regulation of phosphorus metabolic process	0.0264826	ACSL3,BMP6,EGR1,LATS1,PIK3R5,PRNP,RPTOR	rna_Large_Intestine_c18,rna_Thymus_c15
AC159540.2	cluster_6	No	GO:0010566	BP	regulation of ketone biosynthetic process	0.0431526	BMP6,EGR1	rna_Large_Intestine_c18,rna_Thymus_c15
AC159540.2	cluster_6	No	GO:0031401	BP	positive regulation of protein modification process	0.00621279	BMP6,EGR1,LATS1,PIK3R5,PRNP,RPTOR,SAP30BP,SOX4	rna_Large_Intestine_c18,rna_Thymus_c15
AC159540.2	cluster_6	No	GO:0043549	BP	regulation of kinase activity	0.00799427	EGR1,LATS1,NLRC5,PIK3R5,PRNP,RPTOR,UBASH3B	rna_Large_Intestine_c18,rna_Thymus_c15
AC159540.2	cluster_6	No	GO:0045859	BP	regulation of protein kinase activity	0.0186519	EGR1,LATS1,PIK3R5,PRNP,RPTOR,UBASH3B	rna_Large_Intestine_c18,rna_Thymus_c15
AC159540.2	cluster_6	No	GO:0045937	BP	positive regulation of phosphate metabolic process	0.0264826	ACSL3,BMP6,EGR1,LATS1,PIK3R5,PRNP,RPTOR	rna_Large_Intestine_c18,rna_Thymus_c15
AC159540.2	cluster_6	No	GO:0045944	BP	positive regulation of transcription by RNA polymerase II	0.00403338	BMP6,EGR1,GABPB1,NLRC5,RBPJ,SOX4,TFEC,TXK	rna_Large_Intestine_c18,rna_Thymus_c15
AC159540.2	cluster_6	No	GO:0045945	BP	positive regulation of transcription by RNA polymerase III	0.0431526	BAZ1B,RPTOR	rna_Large_Intestine_c18,rna_Thymus_c15
AC159540.2	cluster_6	No	GO:0046886	BP	positive regulation of hormone biosynthetic process	0.0264826	BMP6,EGR1	rna_Large_Intestine_c18,rna_Thymus_c15
AC159540.2	cluster_6	No	GO:0051222	BP	positive regulation of protein transport	0.0349579	ACSL3,BMP6,PRNP,SOX4	rna_Large_Intestine_c18,rna_Thymus_c15
AC159540.2	cluster_6	No	GO:0051338	BP	regulation of transferase activity	0.0114911	EGR1,LATS1,NLRC5,PIK3R5,PRNP,RPTOR,UBASH3B	rna_Large_Intestine_c18,rna_Thymus_c15
AC159540.2	cluster_6	No	GO:0060332	BP	positive regulation of response to interferon-gamma	0.0116532	NLRC5,TXK	rna_Large_Intestine_c18,rna_Thymus_c15
AC159540.2	cluster_6	No	GO:0060335	BP	positive regulation of interferon-gamma-mediated signaling pathway	0.0116532	NLRC5,TXK	rna_Large_Intestine_c18,rna_Thymus_c15
AC159540.2	cluster_6	No	GO:0071417	BP	cellular response to organonitrogen compound	0.0376536	EGR1,PDE3B,PRNP,RPTOR	rna_Large_Intestine_c18,rna_Thymus_c15
AC159540.2	cluster_6	No	GO:1904951	BP	positive regulation of establishment of protein localization	0.0431526	ACSL3,BMP6,PRNP,SOX4	rna_Large_Intestine_c18,rna_Thymus_c15
AC159540.2	cluster_9	No	GO:0006139	BP	nucleobase-containing compound metabolic process	0.0116522	DRG1,FARSB,GTF2B,GTF3C1,ICE1,RAD52,TEFM,ZNF141	rna_Large_Intestine_c21
AC159540.2	cluster_9	No	GO:0006351	BP	transcription, DNA-templated	0.000128164	DRG1,GTF2B,GTF3C1,ICE1,TEFM,ZNF141	rna_Large_Intestine_c21
AC159540.2	cluster_9	No	GO:0006383	BP	transcription by RNA polymerase III	0.0357377	GTF3C1,ICE1	rna_Large_Intestine_c21
AC159540.2	cluster_9	No	GO:0006473	BP	protein acetylation	0.0261945	BRD1,GTF2B,NAA35	rna_Large_Intestine_c21
AC159540.2	cluster_9	No	GO:0009058	BP	biosynthetic process	0.0191793	DRG1,FARSB,GTF2B,GTF3C1,ICE1,PI4K2B,TEFM,ZNF141	rna_Large_Intestine_c21
AC159540.2	cluster_9	No	GO:0009059	BP	macromolecule biosynthetic process	0.00090117	DRG1,FARSB,GTF2B,GTF3C1,ICE1,TEFM,ZNF141	rna_Large_Intestine_c21
AC159540.2	cluster_9	No	GO:0016070	BP	RNA metabolic process	0.00346768	DRG1,FARSB,GTF2B,GTF3C1,ICE1,TEFM,ZNF141	rna_Large_Intestine_c21
AC159540.2	cluster_9	No	GO:0018130	BP	heterocycle biosynthetic process	0.00467454	DRG1,GTF2B,GTF3C1,ICE1,TEFM,ZNF141	rna_Large_Intestine_c21
AC159540.2	cluster_9	No	GO:0019438	BP	aromatic compound biosynthetic process	0.00476713	DRG1,GTF2B,GTF3C1,ICE1,TEFM,ZNF141	rna_Large_Intestine_c21
AC159540.2	cluster_9	No	GO:0032774	BP	RNA biosynthetic process	0.000219251	DRG1,GTF2B,GTF3C1,ICE1,TEFM,ZNF141	rna_Large_Intestine_c21
AC159540.2	cluster_9	No	GO:0034654	BP	nucleobase-containing compound biosynthetic process	0.00271447	DRG1,GTF2B,GTF3C1,ICE1,TEFM,ZNF141	rna_Large_Intestine_c21
AC159540.2	cluster_9	No	GO:0043543	BP	protein acylation	0.0357377	BRD1,GTF2B,NAA35	rna_Large_Intestine_c21
AC159540.2	cluster_9	No	GO:0044249	BP	cellular biosynthetic process	0.0159143	DRG1,FARSB,GTF2B,GTF3C1,ICE1,PI4K2B,TEFM,ZNF141	rna_Large_Intestine_c21
AC159540.2	cluster_9	No	GO:0044271	BP	cellular nitrogen compound biosynthetic process	0.00363681	DRG1,FARSB,GTF2B,GTF3C1,ICE1,TEFM,ZNF141	rna_Large_Intestine_c21
AC159540.2	cluster_9	No	GO:0090304	BP	nucleic acid metabolic process	0.00339874	DRG1,FARSB,GTF2B,GTF3C1,ICE1,RAD52,TEFM,ZNF141	rna_Large_Intestine_c21
AC159540.2	cluster_9	No	GO:0097659	BP	nucleic acid-templated transcription	0.000128164	DRG1,GTF2B,GTF3C1,ICE1,TEFM,ZNF141	rna_Large_Intestine_c21
AC159540.2	cluster_9	No	GO:1901362	BP	organic cyclic compound biosynthetic process	0.0116522	DRG1,GTF2B,GTF3C1,ICE1,TEFM,ZNF141	rna_Large_Intestine_c21
AC159540.2	cluster_9	No	GO:1901576	BP	organic substance biosynthetic process	0.0184813	DRG1,FARSB,GTF2B,GTF3C1,ICE1,PI4K2B,TEFM,ZNF141	rna_Large_Intestine_c21
ACADL	cluster_1	No	GO:0007010	BP	cytoskeleton organization	0.039795	DLC1,DMD,GAB1,PRKG1,TACC2,TTN	rna_Lung_c4,rna_Lung_c1
ACADL	cluster_1	No	GO:0030029	BP	actin filament-based process	0.0155101	DLC1,DMD,GAB1,PRKG1,TTN	rna_Lung_c4,rna_Lung_c1
ACADL	cluster_1	No	GO:0030036	BP	actin cytoskeleton organization	0.00796512	DLC1,DMD,GAB1,PRKG1,TTN	rna_Lung_c4,rna_Lung_c1
ACADL	cluster_1	No	GO:0034110	BP	regulation of homotypic cell-cell adhesion	0.0195427	ANK3,PRKCQ,PRKG1	rna_Lung_c4,rna_Lung_c1
ACADL	cluster_1	No	GO:0048468	BP	cell development	0.039795	DMD,ETV1,MAGI2,PBX3,TTN	rna_Lung_c4,rna_Lung_c1
ACADL	cluster_1	No	GO:0048666	BP	neuron development	0.0249268	DMD,ETV1,PBX3	rna_Lung_c4,rna_Lung_c1
ACADL	cluster_2	No	GO:0006139	BP	nucleobase-containing compound metabolic process	3.63263e-07	DDX52,GTF3C1,INTS4,NSUN6,PCID2,POT1,PPCDC,PPP2R1A,PURA,RAD17,RAD54B,TCEA1,UCK2	rna_Kidney_c27
ACADL	cluster_2	No	GO:0009058	BP	biosynthetic process	0.0204136	FLVCR1,GTF3C1,PCID2,POT1,PPCDC,TCEA1,UCK2,XYLT1	rna_Kidney_c27
ACADL	cluster_2	No	GO:0009059	BP	macromolecule biosynthetic process	0.0359438	GTF3C1,PCID2,POT1,TCEA1,XYLT1	rna_Kidney_c27
ACADL	cluster_2	No	GO:0016070	BP	RNA metabolic process	0.00173384	DDX52,GTF3C1,INTS4,NSUN6,PCID2,PPP2R1A,TCEA1	rna_Kidney_c27
ACADL	cluster_2	No	GO:0018130	BP	heterocycle biosynthetic process	0.000220435	FLVCR1,GTF3C1,PCID2,POT1,PPCDC,TCEA1,UCK2	rna_Kidney_c27
ACADL	cluster_2	No	GO:0019438	BP	aromatic compound biosynthetic process	0.00025444	FLVCR1,GTF3C1,PCID2,POT1,PPCDC,TCEA1,UCK2	rna_Kidney_c27
ACADL	cluster_2	No	GO:0034654	BP	nucleobase-containing compound biosynthetic process	0.000904823	GTF3C1,PCID2,POT1,PPCDC,TCEA1,UCK2	rna_Kidney_c27
ACADL	cluster_2	No	GO:0034660	BP	ncRNA metabolic process	0.0333448	DDX52,GTF3C1,INTS4,NSUN6	rna_Kidney_c27
ACADL	cluster_2	No	GO:0044249	BP	cellular biosynthetic process	0.0151909	FLVCR1,GTF3C1,PCID2,POT1,PPCDC,TCEA1,UCK2,XYLT1	rna_Kidney_c27
ACADL	cluster_2	No	GO:0044271	BP	cellular nitrogen compound biosynthetic process	0.001905	FLVCR1,GTF3C1,PCID2,POT1,PPCDC,TCEA1,UCK2	rna_Kidney_c27
ACADL	cluster_2	No	GO:0090304	BP	nucleic acid metabolic process	1.50777e-06	DDX52,GTF3C1,INTS4,NSUN6,PCID2,POT1,PPP2R1A,PURA,RAD17,RAD54B,TCEA1	rna_Kidney_c27
ACADL	cluster_2	No	GO:1901362	BP	organic cyclic compound biosynthetic process	0.000799739	FLVCR1,GTF3C1,PCID2,POT1,PPCDC,TCEA1,UCK2	rna_Kidney_c27
ACADL	cluster_2	No	GO:1901576	BP	organic substance biosynthetic process	0.0169412	FLVCR1,GTF3C1,PCID2,POT1,PPCDC,TCEA1,UCK2,XYLT1	rna_Kidney_c27
ACER2	cluster_12	No	GO:0006623	BP	protein targeting to vacuole	0.0333204	SORL1,VPS13D	rna_Kidney_c0,rna_Kidney_c30
ACER2	cluster_12	No	GO:0006793	BP	phosphorus metabolic process	0.0106416	ACSL3,DGKH,INPP4B,PIGZ,PKN2,PRKCE,PTPRR,TNKS	rna_Kidney_c0,rna_Kidney_c30
ACER2	cluster_12	No	GO:0006796	BP	phosphate-containing compound metabolic process	0.0105434	ACSL3,DGKH,INPP4B,PIGZ,PKN2,PRKCE,PTPRR,TNKS	rna_Kidney_c0,rna_Kidney_c30
ACER2	cluster_12	No	GO:0007010	BP	cytoskeleton organization	0.0185157	ARHGAP10,BRWD1,CAPZA1,PKHD1,SEMA6A,TNKS	rna_Kidney_c0,rna_Kidney_c30
ACER2	cluster_12	No	GO:0009968	BP	negative regulation of signal transduction	0.00955726	FHL2,GATA3,PKHD1,PPARG,PTPRR,SEMA6A,SERPINE1,SORL1	rna_Kidney_c0,rna_Kidney_c30
ACER2	cluster_12	No	GO:0010632	BP	regulation of epithelial cell migration	0.0407693	GATA3,PPARG,PRKCE,PTPRR	rna_Kidney_c0,rna_Kidney_c30
ACER2	cluster_12	No	GO:0010648	BP	negative regulation of cell communication	0.0105434	FHL2,GATA3,PKHD1,PPARG,PTPRR,SEMA6A,SERPINE1,SORL1	rna_Kidney_c0,rna_Kidney_c30
ACER2	cluster_12	No	GO:0015031	BP	protein transport	0.0225251	ANK3,ARFIP1,PPARG,SORL1,VPS13D	rna_Kidney_c0,rna_Kidney_c30
ACER2	cluster_12	No	GO:0018105	BP	peptidyl-serine phosphorylation	0.0443937	PKN2,PRKCE,TNKS	rna_Kidney_c0,rna_Kidney_c30
ACER2	cluster_12	No	GO:0018193	BP	peptidyl-amino acid modification	0.0106416	ASPH,KANSL1,MGAT5,PKN2,PRKCE,TNKS	rna_Kidney_c0,rna_Kidney_c30
ACER2	cluster_12	No	GO:0018209	BP	peptidyl-serine modification	0.0443937	PKN2,PRKCE,TNKS	rna_Kidney_c0,rna_Kidney_c30
ACER2	cluster_12	No	GO:0022603	BP	regulation of anatomical structure morphogenesis	0.0491387	BRWD1,GATA3,PKHD1,PPARG,SEMA6A,SERPINE1	rna_Kidney_c0,rna_Kidney_c30
ACER2	cluster_12	No	GO:0023057	BP	negative regulation of signaling	0.0106416	FHL2,GATA3,PKHD1,PPARG,PTPRR,SEMA6A,SERPINE1,SORL1	rna_Kidney_c0,rna_Kidney_c30
ACER2	cluster_12	No	GO:0030334	BP	regulation of cell migration	0.00202588	GATA3,LIMCH1,MGAT5,PPARG,PRKCE,PTPRR,SEMA6A,SERPINE1,SORL1	rna_Kidney_c0,rna_Kidney_c30
ACER2	cluster_12	No	GO:0032386	BP	regulation of intracellular transport	0.0394775	ANK3,ARFIP1,ATP9A,SORL1	rna_Kidney_c0,rna_Kidney_c30
ACER2	cluster_12	No	GO:0032507	BP	maintenance of protein location in cell	0.0124634	ANK3,SORL1,VPS13D	rna_Kidney_c0,rna_Kidney_c30
ACER2	cluster_12	No	GO:0032880	BP	regulation of protein localization	0.0191473	ACSL3,ANK3,ARFIP1,PPARG,PRKCE,SORL1	rna_Kidney_c0,rna_Kidney_c30
ACER2	cluster_12	No	GO:0032956	BP	regulation of actin cytoskeleton organization	0.0407693	ARFIP1,CAPZA1,LIMCH1,PRKCE	rna_Kidney_c0,rna_Kidney_c30
ACER2	cluster_12	No	GO:0033043	BP	regulation of organelle organization	0.0125096	ARFIP1,CAPZA1,LIMCH1,PPARG,PRKCE,TNKS,VPS13D	rna_Kidney_c0,rna_Kidney_c30
ACER2	cluster_12	No	GO:0034330	BP	cell junction organization	0.0203692	ANK3,CAPZA1,PKHD1,PKN2,SDK1	rna_Kidney_c0,rna_Kidney_c30
ACER2	cluster_12	No	GO:0040012	BP	regulation of locomotion	0.000585788	GATA3,LIMCH1,MGAT5,PKN2,PPARG,PRKCE,PTPRR,SEMA6A,SERPINE1,SORL1	rna_Kidney_c0,rna_Kidney_c30
ACER2	cluster_12	No	GO:0040013	BP	negative regulation of locomotion	0.00368147	GATA3,LIMCH1,PPARG,PTPRR,SEMA6A,SERPINE1	rna_Kidney_c0,rna_Kidney_c30
ACER2	cluster_12	No	GO:0042789	BP	mRNA transcription by RNA polymerase II	0.0443937	NCOA1,PPARG	rna_Kidney_c0,rna_Kidney_c30
ACER2	cluster_12	No	GO:0043409	BP	negative regulation of MAPK cascade	0.00627955	PPARG,PTPRR,SEMA6A,SORL1	rna_Kidney_c0,rna_Kidney_c30
ACER2	cluster_12	No	GO:0044092	BP	negative regulation of molecular function	0.00234121	ANK3,MGAT5,PKHD1,PPARG,PRKCE,SERPINE1,SORL1,TNKS	rna_Kidney_c0,rna_Kidney_c30
ACER2	cluster_12	No	GO:0045053	BP	protein retention in Golgi apparatus	0.0105434	SORL1,VPS13D	rna_Kidney_c0,rna_Kidney_c30
ACER2	cluster_12	No	GO:0045184	BP	establishment of protein localization	0.0306734	ANK3,ARFIP1,PPARG,SORL1,VPS13D	rna_Kidney_c0,rna_Kidney_c30
ACER2	cluster_12	No	GO:0045185	BP	maintenance of protein location	0.0203692	ANK3,SORL1,VPS13D	rna_Kidney_c0,rna_Kidney_c30
ACER2	cluster_12	No	GO:0051098	BP	regulation of binding	0.0306734	GATA3,PPARG,SORL1,TNKS	rna_Kidney_c0,rna_Kidney_c30
ACER2	cluster_12	No	GO:0051101	BP	regulation of DNA binding	0.0306734	GATA3,PPARG,TNKS	rna_Kidney_c0,rna_Kidney_c30
ACER2	cluster_12	No	GO:0051222	BP	positive regulation of protein transport	0.0267039	ACSL3,ANK3,PPARG,SORL1	rna_Kidney_c0,rna_Kidney_c30
ACER2	cluster_12	No	GO:0051223	BP	regulation of protein transport	0.0203692	ACSL3,ANK3,ARFIP1,PPARG,SORL1	rna_Kidney_c0,rna_Kidney_c30
ACER2	cluster_12	No	GO:0051270	BP	regulation of cellular component movement	0.000142967	GATA3,LIMCH1,MGAT5,PKHD1,PKN2,PPARG,PRKCE,PTPRR,SEMA6A,SERPINE1,SORL1	rna_Kidney_c0,rna_Kidney_c30
ACER2	cluster_12	No	GO:0051271	BP	negative regulation of cellular component movement	0.0028503	GATA3,LIMCH1,PKHD1,PPARG,PTPRR,SERPINE1	rna_Kidney_c0,rna_Kidney_c30
ACER2	cluster_12	No	GO:0051641	BP	cellular localization	0.0419678	ANK3,ARFIP1,PKHD1,SORL1,SYTL2,TNKS,VPS13D	rna_Kidney_c0,rna_Kidney_c30
ACER2	cluster_12	No	GO:0051651	BP	maintenance of location in cell	0.0306734	ANK3,SORL1,VPS13D	rna_Kidney_c0,rna_Kidney_c30
ACER2	cluster_12	No	GO:0060341	BP	regulation of cellular localization	0.0127901	ACSL3,ANK3,ARFIP1,ATP9A,PRKCE,SORL1	rna_Kidney_c0,rna_Kidney_c30
ACER2	cluster_12	No	GO:0060548	BP	negative regulation of cell death	0.0419678	ARHGAP10,FHL2,GATA3,PKHD1,SERPINE1,SORL1	rna_Kidney_c0,rna_Kidney_c30
ACER2	cluster_12	No	GO:0060627	BP	regulation of vesicle-mediated transport	0.0493591	ACSL3,ARFIP1,ATP9A,SERPINE1,SORL1	rna_Kidney_c0,rna_Kidney_c30
ACER2	cluster_12	No	GO:0070201	BP	regulation of establishment of protein localization	0.0233268	ACSL3,ANK3,ARFIP1,PPARG,SORL1	rna_Kidney_c0,rna_Kidney_c30
ACER2	cluster_12	No	GO:0071702	BP	organic substance transport	0.0407693	ACSL3,ANK3,ARFIP1,ATP9A,PPARG,SORL1,VPS13D	rna_Kidney_c0,rna_Kidney_c30
ACER2	cluster_12	No	GO:0090287	BP	regulation of cellular response to growth factor stimulus	0.0419678	GATA3,PPARG,SEMA6A,SORL1	rna_Kidney_c0,rna_Kidney_c30
ACER2	cluster_12	No	GO:0090288	BP	negative regulation of cellular response to growth factor stimulus	0.00561284	GATA3,PPARG,SEMA6A,SORL1	rna_Kidney_c0,rna_Kidney_c30
ACER2	cluster_12	No	GO:0090407	BP	organophosphate biosynthetic process	0.0407693	ACSL3,DGKH,INPP4B,PIGZ	rna_Kidney_c0,rna_Kidney_c30
ACER2	cluster_12	No	GO:0110053	BP	regulation of actin filament organization	0.0203692	ARFIP1,CAPZA1,LIMCH1,PRKCE	rna_Kidney_c0,rna_Kidney_c30
ACER2	cluster_12	No	GO:1902532	BP	negative regulation of intracellular signal transduction	0.00276333	FHL2,PKHD1,PPARG,PTPRR,SEMA6A,SORL1	rna_Kidney_c0,rna_Kidney_c30
ACER2	cluster_12	No	GO:1902903	BP	regulation of supramolecular fiber organization	0.0466558	ARFIP1,CAPZA1,LIMCH1,PRKCE	rna_Kidney_c0,rna_Kidney_c30
ACER2	cluster_12	No	GO:1903649	BP	regulation of cytoplasmic transport	0.00561284	ARFIP1,ATP9A,SORL1	rna_Kidney_c0,rna_Kidney_c30
ACER2	cluster_12	No	GO:1903829	BP	positive regulation of protein localization	0.0120806	ACSL3,ANK3,PPARG,PRKCE,SORL1	rna_Kidney_c0,rna_Kidney_c30
ACER2	cluster_12	No	GO:1904035	BP	regulation of epithelial cell apoptotic process	0.0419678	GATA3,PKHD1,SERPINE1	rna_Kidney_c0,rna_Kidney_c30
ACER2	cluster_12	No	GO:1904036	BP	negative regulation of epithelial cell apoptotic process	0.0179896	GATA3,PKHD1,SERPINE1	rna_Kidney_c0,rna_Kidney_c30
ACER2	cluster_12	No	GO:1904951	BP	positive regulation of establishment of protein localization	0.0322916	ACSL3,ANK3,PPARG,SORL1	rna_Kidney_c0,rna_Kidney_c30
ACER2	cluster_12	No	GO:1905279	BP	regulation of retrograde transport, endosome to Golgi	0.0105434	ARFIP1,ATP9A	rna_Kidney_c0,rna_Kidney_c30
ACER2	cluster_12	No	GO:1905477	BP	positive regulation of protein localization to membrane	0.0179896	ACSL3,ANK3,PRKCE	rna_Kidney_c0,rna_Kidney_c30
ACER2	cluster_12	No	GO:2000145	BP	regulation of cell motility	0.000454422	GATA3,LIMCH1,MGAT5,PKN2,PPARG,PRKCE,PTPRR,SEMA6A,SERPINE1,SORL1	rna_Kidney_c0,rna_Kidney_c30
ACER2	cluster_12	No	GO:2000146	BP	negative regulation of cell motility	0.0130916	GATA3,LIMCH1,PPARG,PTPRR,SERPINE1	rna_Kidney_c0,rna_Kidney_c30
ACER2	cluster_12	No	GO:2001135	BP	regulation of endocytic recycling	0.0203692	ATP9A,SORL1	rna_Kidney_c0,rna_Kidney_c30
ACER2	cluster_12	Yes	GO:0001952	BP	regulation of cell-matrix adhesion	0.0419678	LIMCH1,PKHD1,SERPINE1	rna_Kidney_c0,rna_Kidney_c30
ACER2	cluster_12	Yes	GO:0006629	BP	lipid metabolic process	0.0361048	ACSL3,CYP3A5,DGKH,INPP4B,PIGZ,PPARG	rna_Kidney_c0,rna_Kidney_c30
ACER2	cluster_12	Yes	GO:0009058	BP	biosynthetic process	0.0108583	ACSL3,DGKH,GATA3,GBE1,INPP4B,NCOA1,PIGZ,PPARG	rna_Kidney_c0,rna_Kidney_c30
ACER2	cluster_12	Yes	GO:0030155	BP	regulation of cell adhesion	0.0106416	ANK3,GATA3,LIMCH1,MAGI1,PKHD1,SEMA6A,SERPINE1	rna_Kidney_c0,rna_Kidney_c30
ACER2	cluster_12	Yes	GO:0044249	BP	cellular biosynthetic process	0.00954858	ACSL3,DGKH,GATA3,GBE1,INPP4B,NCOA1,PIGZ,PPARG	rna_Kidney_c0,rna_Kidney_c30
ACER2	cluster_12	Yes	GO:0044255	BP	cellular lipid metabolic process	0.0176051	ACSL3,CYP3A5,DGKH,INPP4B,PIGZ,PPARG	rna_Kidney_c0,rna_Kidney_c30
ACER2	cluster_12	Yes	GO:0051336	BP	regulation of hydrolase activity	0.0491387	ASPH,MGAT5,PPARG,SERPINE1,SORL1,TBC1D22A	rna_Kidney_c0,rna_Kidney_c30
ACER2	cluster_12	Yes	GO:0052548	BP	regulation of endopeptidase activity	0.0439951	ASPH,PPARG,SERPINE1,SORL1	rna_Kidney_c0,rna_Kidney_c30
ACER2	cluster_12	Yes	GO:1901576	BP	organic substance biosynthetic process	0.0105434	ACSL3,DGKH,GATA3,GBE1,INPP4B,NCOA1,PIGZ,PPARG	rna_Kidney_c0,rna_Kidney_c30
ACER2	cluster_34	No	GO:0002181	BP	cytoplasmic translation	0.00156148	DRG1,RPL18A,RPL41,UBA52	atac_Kidney_c4,atac_Kidney_c8,atac_Kidney_c9,atac_Lung_c0,atac_Kidney_c2,atac_Pancreas_c4,atac_Pancreas_c3,atac_Pancreas_c5,atac_Pancreas_c24
ACER2	cluster_34	No	GO:0006412	BP	translation	0.00233565	DRG1,RPL18A,RPL41,UBA52	atac_Kidney_c4,atac_Kidney_c8,atac_Kidney_c9,atac_Lung_c0,atac_Kidney_c2,atac_Pancreas_c4,atac_Pancreas_c3,atac_Pancreas_c5,atac_Pancreas_c24
ACER2	cluster_34	No	GO:0006518	BP	peptide metabolic process	0.0485487	DRG1,RPL18A,RPL41,UBA52	atac_Kidney_c4,atac_Kidney_c8,atac_Kidney_c9,atac_Lung_c0,atac_Kidney_c2,atac_Pancreas_c4,atac_Pancreas_c3,atac_Pancreas_c5,atac_Pancreas_c24
ACER2	cluster_34	No	GO:0009059	BP	macromolecule biosynthetic process	0.0484461	DRG1,NFX1,RPL18A,RPL41,UBA52	atac_Kidney_c4,atac_Kidney_c8,atac_Kidney_c9,atac_Lung_c0,atac_Kidney_c2,atac_Pancreas_c4,atac_Pancreas_c3,atac_Pancreas_c5,atac_Pancreas_c24
ACER2	cluster_34	No	GO:0032446	BP	protein modification by small protein conjugation	0.0232651	HERC5,NFX1,PIAS4,TNKS,UBA52	atac_Kidney_c4,atac_Kidney_c8,atac_Kidney_c9,atac_Lung_c0,atac_Kidney_c2,atac_Pancreas_c4,atac_Pancreas_c3,atac_Pancreas_c5,atac_Pancreas_c24
ACER2	cluster_34	No	GO:0034645	BP	cellular macromolecule biosynthetic process	0.0257239	DRG1,RPL18A,RPL41,UBA52	atac_Kidney_c4,atac_Kidney_c8,atac_Kidney_c9,atac_Lung_c0,atac_Kidney_c2,atac_Pancreas_c4,atac_Pancreas_c3,atac_Pancreas_c5,atac_Pancreas_c24
ACER2	cluster_34	No	GO:0043043	BP	peptide biosynthetic process	0.00627368	DRG1,RPL18A,RPL41,UBA52	atac_Kidney_c4,atac_Kidney_c8,atac_Kidney_c9,atac_Lung_c0,atac_Kidney_c2,atac_Pancreas_c4,atac_Pancreas_c3,atac_Pancreas_c5,atac_Pancreas_c24
ACER2	cluster_34	No	GO:0043604	BP	amide biosynthetic process	0.00169237	DRG1,RPL18A,RPL41,ST6GALNAC3,UBA52	atac_Kidney_c4,atac_Kidney_c8,atac_Kidney_c9,atac_Lung_c0,atac_Kidney_c2,atac_Pancreas_c4,atac_Pancreas_c3,atac_Pancreas_c5,atac_Pancreas_c24
ACER2	cluster_34	No	GO:0070647	BP	protein modification by small protein conjugation or removal	0.0333256	HERC5,NFX1,PIAS4,TNKS,UBA52	atac_Kidney_c4,atac_Kidney_c8,atac_Kidney_c9,atac_Lung_c0,atac_Kidney_c2,atac_Pancreas_c4,atac_Pancreas_c3,atac_Pancreas_c5,atac_Pancreas_c24
ACER2	cluster_34	Yes	GO:0043603	BP	cellular amide metabolic process	0.0275871	DRG1,RPL18A,RPL41,ST6GALNAC3,UBA52	atac_Kidney_c4,atac_Kidney_c8,atac_Kidney_c9,atac_Lung_c0,atac_Kidney_c2,atac_Pancreas_c4,atac_Pancreas_c3,atac_Pancreas_c5,atac_Pancreas_c24
ACER2	cluster_34	Yes	GO:0044271	BP	cellular nitrogen compound biosynthetic process	0.0271953	DRG1,NFX1,RPL18A,RPL41,ST6GALNAC3,UBA52	atac_Kidney_c4,atac_Kidney_c8,atac_Kidney_c9,atac_Lung_c0,atac_Kidney_c2,atac_Pancreas_c4,atac_Pancreas_c3,atac_Pancreas_c5,atac_Pancreas_c24
ACHE	cluster_18	No	GO:0002181	BP	cytoplasmic translation	0.0238098	DRG1,RPL18A,RPS12	rna_Large_Intestine_c20,atac_Kidney_c54
ACHE	cluster_18	No	GO:0009058	BP	biosynthetic process	0.00165078	CTR9,DDX21,DRG1,FLVCR1,MGST3,RPL18A,RPS12,SRD5A1,UAP1,ZNF141	rna_Large_Intestine_c20,atac_Kidney_c54
ACHE	cluster_18	No	GO:0009059	BP	macromolecule biosynthetic process	0.00708074	CTR9,DDX21,DRG1,RPL18A,RPS12,ZNF141	rna_Large_Intestine_c20,atac_Kidney_c54
ACHE	cluster_18	No	GO:0016070	BP	RNA metabolic process	0.0271293	CTR9,DDX21,DRG1,PCBP3,TARDBP,ZNF141	rna_Large_Intestine_c20,atac_Kidney_c54
ACHE	cluster_18	No	GO:0018130	BP	heterocycle biosynthetic process	0.00666832	CTR9,DDX21,DRG1,FLVCR1,UAP1,ZNF141	rna_Large_Intestine_c20,atac_Kidney_c54
ACHE	cluster_18	No	GO:0019438	BP	aromatic compound biosynthetic process	0.00708074	CTR9,DDX21,DRG1,FLVCR1,UAP1,ZNF141	rna_Large_Intestine_c20,atac_Kidney_c54
ACHE	cluster_18	No	GO:0032774	BP	RNA biosynthetic process	0.037904	CTR9,DDX21,DRG1,ZNF141	rna_Large_Intestine_c20,atac_Kidney_c54
ACHE	cluster_18	No	GO:0034654	BP	nucleobase-containing compound biosynthetic process	0.0221738	CTR9,DDX21,DRG1,UAP1,ZNF141	rna_Large_Intestine_c20,atac_Kidney_c54
ACHE	cluster_18	No	GO:0044249	BP	cellular biosynthetic process	0.00165078	CTR9,DDX21,DRG1,FLVCR1,MGST3,RPL18A,RPS12,SRD5A1,UAP1,ZNF141	rna_Large_Intestine_c20,atac_Kidney_c54
ACHE	cluster_18	No	GO:0044271	BP	cellular nitrogen compound biosynthetic process	0.00165078	CTR9,DDX21,DRG1,FLVCR1,RPL18A,RPS12,UAP1,ZNF141	rna_Large_Intestine_c20,atac_Kidney_c54
ACHE	cluster_18	No	GO:1901362	BP	organic cyclic compound biosynthetic process	0.00226593	CTR9,DDX21,DRG1,FLVCR1,SRD5A1,UAP1,ZNF141	rna_Large_Intestine_c20,atac_Kidney_c54
ACHE	cluster_18	No	GO:1901576	BP	organic substance biosynthetic process	0.00165078	CTR9,DDX21,DRG1,FLVCR1,MGST3,RPL18A,RPS12,SRD5A1,UAP1,ZNF141	rna_Large_Intestine_c20,atac_Kidney_c54
ACHE	cluster_27	No	GO:0000226	BP	microtubule cytoskeleton organization	0.00231542	KIF2C,RAN,STMN1,TNKS,TPX2	rna_Spleen_c20
ACHE	cluster_27	No	GO:0000278	BP	mitotic cell cycle	0.0171726	CLTC,RAN,TPX2	rna_Spleen_c20
ACHE	cluster_27	No	GO:0006458	BP	'de novo' protein folding	0.0493929	HSPA1A,HSPA1B	rna_Spleen_c20
ACHE	cluster_27	No	GO:0006886	BP	intracellular protein transport	0.0283005	CLTC,RAN,TSPO,ZFAND6	rna_Spleen_c20
ACHE	cluster_27	No	GO:0007010	BP	cytoskeleton organization	0.0168969	KIF2C,PRICKLE4,RAN,STMN1,TNKS,TPX2	rna_Spleen_c20
ACHE	cluster_27	No	GO:0007017	BP	microtubule-based process	3.1257e-06	BCAS3,GTSE1,KIF2C,RAN,SLC22A16,SSX2IP,STMN1,TNKS,TPX2	rna_Spleen_c20
ACHE	cluster_27	No	GO:0007019	BP	microtubule depolymerization	0.0285698	KIF2C,STMN1	rna_Spleen_c20
ACHE	cluster_27	No	GO:0007049	BP	cell cycle	0.0267951	CLTC,RAN,TPX2	rna_Spleen_c20
ACHE	cluster_27	No	GO:0007051	BP	spindle organization	0.00112859	RAN,STMN1,TNKS,TPX2	rna_Spleen_c20
ACHE	cluster_27	No	GO:0007052	BP	mitotic spindle organization	0.000554523	RAN,STMN1,TNKS,TPX2	rna_Spleen_c20
ACHE	cluster_27	No	GO:0008277	BP	regulation of G protein-coupled receptor signaling pathway	0.0285698	CAMKMT,RGS6,STMN1	rna_Spleen_c20
ACHE	cluster_27	No	GO:0010286	BP	heat acclimation	0.00781104	HSPA1A,HSPA1B	rna_Spleen_c20
ACHE	cluster_27	No	GO:0010564	BP	regulation of cell cycle process	5.33478e-05	CLTC,GTSE1,HSPA1A,HSPA1B,PKN2,TNKS,TPX2,UBE2C	rna_Spleen_c20
ACHE	cluster_27	No	GO:0010639	BP	negative regulation of organelle organization	0.0198337	HSPA1A,STMN1,TNKS,TPX2	rna_Spleen_c20
ACHE	cluster_27	No	GO:0010968	BP	regulation of microtubule nucleation	0.00781104	HSPA1A,HSPA1B	rna_Spleen_c20
ACHE	cluster_27	No	GO:0018105	BP	peptidyl-serine phosphorylation	0.0386445	PKN2,TBK1,TNKS	rna_Spleen_c20
ACHE	cluster_27	No	GO:0018209	BP	peptidyl-serine modification	0.0386445	PKN2,TBK1,TNKS	rna_Spleen_c20
ACHE	cluster_27	No	GO:0022402	BP	cell cycle process	1.49556e-06	CCNB2,GTSE1,KIF2C,RAN,SSX2IP,STMN1,TNKS,TPX2,UBE2C	rna_Spleen_c20
ACHE	cluster_27	No	GO:0031023	BP	microtubule organizing center organization	0.0493929	BCAS3,SSX2IP	rna_Spleen_c20
ACHE	cluster_27	No	GO:0031109	BP	microtubule polymerization or depolymerization	0.0493929	KIF2C,STMN1	rna_Spleen_c20
ACHE	cluster_27	No	GO:0031110	BP	regulation of microtubule polymerization or depolymerization	0.00112859	HSPA1A,HSPA1B,STMN1,TPX2	rna_Spleen_c20
ACHE	cluster_27	No	GO:0031112	BP	positive regulation of microtubule polymerization or depolymerization	0.0493929	HSPA1A,HSPA1B	rna_Spleen_c20
ACHE	cluster_27	No	GO:0031113	BP	regulation of microtubule polymerization	0.00443119	HSPA1A,HSPA1B,STMN1	rna_Spleen_c20
ACHE	cluster_27	No	GO:0031116	BP	positive regulation of microtubule polymerization	0.0386445	HSPA1A,HSPA1B	rna_Spleen_c20
ACHE	cluster_27	No	GO:0031331	BP	positive regulation of cellular catabolic process	0.032051	HSPA1A,HSPA1B,PSMC5,TBK1	rna_Spleen_c20
ACHE	cluster_27	No	GO:0031396	BP	regulation of protein ubiquitination	0.0109847	HSPA1A,HSPA1B,UBE2C	rna_Spleen_c20
ACHE	cluster_27	No	GO:0031397	BP	negative regulation of protein ubiquitination	0.0493929	HSPA1A,HSPA1B	rna_Spleen_c20
ACHE	cluster_27	No	GO:0032069	BP	regulation of nuclease activity	0.0386445	HMGB2,HSPA1A	rna_Spleen_c20
ACHE	cluster_27	No	GO:0032075	BP	positive regulation of nuclease activity	0.00781104	HMGB2,HSPA1A	rna_Spleen_c20
ACHE	cluster_27	No	GO:0032271	BP	regulation of protein polymerization	0.0493929	HSPA1A,HSPA1B,STMN1	rna_Spleen_c20
ACHE	cluster_27	No	GO:0032886	BP	regulation of microtubule-based process	0.00051529	CLTC,HSPA1A,HSPA1B,STMN1,TPX2	rna_Spleen_c20
ACHE	cluster_27	No	GO:0033043	BP	regulation of organelle organization	0.00228117	BCAS3,CLTC,HSPA1A,HSPA1B,STMN1,TNKS,TPX2,UBE2C	rna_Spleen_c20
ACHE	cluster_27	No	GO:0033120	BP	positive regulation of RNA splicing	0.0493929	HSPA1A,PRDX6	rna_Spleen_c20
ACHE	cluster_27	No	GO:0033365	BP	protein localization to organelle	0.0431846	RAN,TNKS,TSPO,ZFAND6	rna_Spleen_c20
ACHE	cluster_27	No	GO:0033554	BP	cellular response to stress	0.0285698	CBX3,GTSE1,HMGB2,HSPA1A,HSPA1B,XPR1	rna_Spleen_c20
ACHE	cluster_27	No	GO:0034605	BP	cellular response to heat	0.0493929	HSPA1A,HSPA1B	rna_Spleen_c20
ACHE	cluster_27	No	GO:0034620	BP	cellular response to unfolded protein	0.0386445	HSPA1A,HSPA1B	rna_Spleen_c20
ACHE	cluster_27	No	GO:0035967	BP	cellular response to topologically incorrect protein	0.0493929	HSPA1A,HSPA1B	rna_Spleen_c20
ACHE	cluster_27	No	GO:0042026	BP	protein refolding	0.0171726	HSPA1A,HSPA1B	rna_Spleen_c20
ACHE	cluster_27	No	GO:0043085	BP	positive regulation of catalytic activity	0.00781104	BCAS3,HMGB2,HSPA1A,RGS10,RGS6,TNKS,TPX2,UBE2C	rna_Spleen_c20
ACHE	cluster_27	No	GO:0043087	BP	regulation of GTPase activity	0.0285698	BCAS3,RGS10,RGS6,STMN1	rna_Spleen_c20
ACHE	cluster_27	No	GO:0043933	BP	protein-containing complex organization	0.0332969	CLTC,HMGB2,HSPA1A,KIF2C,STMN1,UBE2C	rna_Spleen_c20
ACHE	cluster_27	No	GO:0044265	BP	cellular macromolecule catabolic process	0.0483922	HSPA1A,HSPA1B,PSMC5,UBE2C	rna_Spleen_c20
ACHE	cluster_27	No	GO:0045639	BP	positive regulation of myeloid cell differentiation	0.019954	HMGB2,HSPA1A,HSPA1B	rna_Spleen_c20
ACHE	cluster_27	No	GO:0045646	BP	regulation of erythrocyte differentiation	0.00308376	HMGB2,HSPA1A,HSPA1B	rna_Spleen_c20
ACHE	cluster_27	No	GO:0045648	BP	positive regulation of erythrocyte differentiation	0.00121039	HMGB2,HSPA1A,HSPA1B	rna_Spleen_c20
ACHE	cluster_27	No	GO:0046907	BP	intracellular transport	0.00194418	CLTC,HSPA1A,MON2,RAN,SSX2IP,TSPO,ZFAND6	rna_Spleen_c20
ACHE	cluster_27	No	GO:0051084	BP	'de novo' posttranslational protein folding	0.0386445	HSPA1A,HSPA1B	rna_Spleen_c20
ACHE	cluster_27	No	GO:0051085	BP	chaperone cofactor-dependent protein refolding	0.0386445	HSPA1A,HSPA1B	rna_Spleen_c20
ACHE	cluster_27	No	GO:0051098	BP	regulation of binding	0.0267951	HMGB2,RAN,STMN1,TNKS	rna_Spleen_c20
ACHE	cluster_27	No	GO:0051099	BP	positive regulation of binding	0.0359786	HMGB2,RAN,STMN1	rna_Spleen_c20
ACHE	cluster_27	No	GO:0051129	BP	negative regulation of cellular component organization	0.0115111	BCAS3,HSPA1A,HSPA1B,STMN1,TNKS,TPX2	rna_Spleen_c20
ACHE	cluster_27	No	GO:0051225	BP	spindle assembly	0.0285698	TNKS,TPX2	rna_Spleen_c20
ACHE	cluster_27	No	GO:0051336	BP	regulation of hydrolase activity	0.0433577	BCAS3,HMGB2,HSPA1A,RGS10,RGS6,STMN1	rna_Spleen_c20
ACHE	cluster_27	No	GO:0051345	BP	positive regulation of hydrolase activity	0.0413037	BCAS3,HMGB2,HSPA1A,RGS10,RGS6	rna_Spleen_c20
ACHE	cluster_27	No	GO:0051493	BP	regulation of cytoskeleton organization	0.00308376	BCAS3,CLTC,HSPA1A,HSPA1B,STMN1,TPX2	rna_Spleen_c20
ACHE	cluster_27	No	GO:0051641	BP	cellular localization	0.00228117	CLTC,HSPA1A,KIF2C,MON2,RAN,SSX2IP,TNKS,TSPO,ZFAND6	rna_Spleen_c20
ACHE	cluster_27	No	GO:0051649	BP	establishment of localization in cell	0.000669978	CLTC,CYBRD1,HSPA1A,KIF2C,MON2,RAN,SSX2IP,TSPO,ZFAND6	rna_Spleen_c20
ACHE	cluster_27	No	GO:0051726	BP	regulation of cell cycle	6.34677e-05	CCNB2,CLTC,GTSE1,HSPA1A,HSPA1B,PKN2,TNKS,TPX2,UBE2C	rna_Spleen_c20
ACHE	cluster_27	No	GO:0060236	BP	regulation of mitotic spindle organization	3.12342e-05	CLTC,HSPA1A,HSPA1B,TPX2	rna_Spleen_c20
ACHE	cluster_27	No	GO:0061136	BP	regulation of proteasomal protein catabolic process	0.0285698	HSPA1A,HSPA1B,PSMC5	rna_Spleen_c20
ACHE	cluster_27	No	GO:0062207	BP	regulation of pattern recognition receptor signaling pathway	0.032051	HSPA1A,HSPA1B,MFHAS1	rna_Spleen_c20
ACHE	cluster_27	No	GO:0062208	BP	positive regulation of pattern recognition receptor signaling pathway	0.0137414	HSPA1A,HSPA1B,MFHAS1	rna_Spleen_c20
ACHE	cluster_27	No	GO:0070370	BP	cellular heat acclimation	0.00781104	HSPA1A,HSPA1B	rna_Spleen_c20
ACHE	cluster_27	No	GO:0070424	BP	regulation of nucleotide-binding oligomerization domain containing signaling pathway	0.00781104	HSPA1A,HSPA1B	rna_Spleen_c20
ACHE	cluster_27	No	GO:0070426	BP	positive regulation of nucleotide-binding oligomerization domain containing signaling pathway	0.00781104	HSPA1A,HSPA1B	rna_Spleen_c20
ACHE	cluster_27	No	GO:0070432	BP	regulation of nucleotide-binding oligomerization domain containing 2 signaling pathway	0.00781104	HSPA1A,HSPA1B	rna_Spleen_c20
ACHE	cluster_27	No	GO:0070434	BP	positive regulation of nucleotide-binding oligomerization domain containing 2 signaling pathway	0.00781104	HSPA1A,HSPA1B	rna_Spleen_c20
ACHE	cluster_27	No	GO:0070507	BP	regulation of microtubule cytoskeleton organization	8.62925e-05	CLTC,HSPA1A,HSPA1B,STMN1,TPX2	rna_Spleen_c20
ACHE	cluster_27	No	GO:0071383	BP	cellular response to steroid hormone stimulus	0.0493929	HSPA1A,HSPA1B	rna_Spleen_c20
ACHE	cluster_27	No	GO:0072594	BP	establishment of protein localization to organelle	0.0421524	RAN,TSPO,ZFAND6	rna_Spleen_c20
ACHE	cluster_27	No	GO:0090063	BP	positive regulation of microtubule nucleation	0.00781104	HSPA1A,HSPA1B	rna_Spleen_c20
ACHE	cluster_27	No	GO:0090083	BP	regulation of inclusion body assembly	0.0285698	HSPA1A,HSPA1B	rna_Spleen_c20
ACHE	cluster_27	No	GO:0090084	BP	negative regulation of inclusion body assembly	0.0171726	HSPA1A,HSPA1B	rna_Spleen_c20
ACHE	cluster_27	No	GO:0090169	BP	regulation of spindle assembly	0.0171726	HSPA1A,HSPA1B	rna_Spleen_c20
ACHE	cluster_27	No	GO:0090224	BP	regulation of spindle organization	3.12342e-05	CLTC,HSPA1A,HSPA1B,TPX2	rna_Spleen_c20
ACHE	cluster_27	No	GO:1901673	BP	regulation of mitotic spindle assembly	0.0171726	HSPA1A,HSPA1B	rna_Spleen_c20
ACHE	cluster_27	No	GO:1901800	BP	positive regulation of proteasomal protein catabolic process	0.0171726	HSPA1A,HSPA1B,PSMC5	rna_Spleen_c20
ACHE	cluster_27	No	GO:1902850	BP	microtubule cytoskeleton organization involved in mitosis	0.00130346	RAN,STMN1,TNKS,TPX2	rna_Spleen_c20
ACHE	cluster_27	No	GO:1902903	BP	regulation of supramolecular fiber organization	0.0413037	HSPA1A,HSPA1B,STMN1,TPX2	rna_Spleen_c20
ACHE	cluster_27	No	GO:1903047	BP	mitotic cell cycle process	1.29605e-06	CCNB2,GTSE1,KIF2C,RAN,STMN1,TNKS,TPX2,UBE2C	rna_Spleen_c20
ACHE	cluster_27	No	GO:1903050	BP	regulation of proteolysis involved in cellular protein catabolic process	0.0359786	HSPA1A,HSPA1B,PSMC5	rna_Spleen_c20
ACHE	cluster_27	No	GO:1903052	BP	positive regulation of proteolysis involved in cellular protein catabolic process	0.0171726	HSPA1A,HSPA1B,PSMC5	rna_Spleen_c20
ACHE	cluster_27	No	GO:1903265	BP	positive regulation of tumor necrosis factor-mediated signaling pathway	0.00781104	HSPA1A,HSPA1B	rna_Spleen_c20
ACHE	cluster_27	No	GO:1903320	BP	regulation of protein modification by small protein conjugation or removal	0.0235254	HSPA1A,HSPA1B,UBE2C	rna_Spleen_c20
ACHE	cluster_27	No	GO:1903321	BP	negative regulation of protein modification by small protein conjugation or removal	0.0493929	HSPA1A,HSPA1B	rna_Spleen_c20
ACHE	cluster_27	No	GO:1903362	BP	regulation of cellular protein catabolic process	0.0421524	HSPA1A,HSPA1B,PSMC5	rna_Spleen_c20
ACHE	cluster_27	No	GO:1903364	BP	positive regulation of cellular protein catabolic process	0.0267951	HSPA1A,HSPA1B,PSMC5	rna_Spleen_c20
ACP1	cluster_18	No	GO:0000028	BP	ribosomal small subunit assembly	0.0163886	RPS27,RPS28	rna_Spleen_c20,rna_Spleen_c5,rna_Spleen_c8,rna_Thymus_c16,rna_Liver_c14
ACP1	cluster_18	No	GO:0000041	BP	transition metal ion transport	0.00405127	FTH1,SLC25A37,SLC40A1,TFRC	rna_Spleen_c20,rna_Spleen_c5,rna_Spleen_c8,rna_Thymus_c16,rna_Liver_c14
ACP1	cluster_18	No	GO:0006826	BP	iron ion transport	0.00124768	FTH1,SLC25A37,SLC40A1,TFRC	rna_Spleen_c20,rna_Spleen_c5,rna_Spleen_c8,rna_Thymus_c16,rna_Liver_c14
ACP1	cluster_18	No	GO:0006879	BP	cellular iron ion homeostasis	0.00143205	ALAS2,FTH1,SLC40A1,TFRC	rna_Spleen_c20,rna_Spleen_c5,rna_Spleen_c8,rna_Thymus_c16,rna_Liver_c14
ACP1	cluster_18	No	GO:0009056	BP	catabolic process	0.0368221	CD36,CTSB,CTSL,HBA1,HBB,HBM,WDR26	rna_Spleen_c20,rna_Spleen_c5,rna_Spleen_c8,rna_Thymus_c16,rna_Liver_c14
ACP1	cluster_18	No	GO:0015671	BP	oxygen transport	0.0368221	HBA1,HBB	rna_Spleen_c20,rna_Spleen_c5,rna_Spleen_c8,rna_Thymus_c16,rna_Liver_c14
ACP1	cluster_18	No	GO:0020027	BP	hemoglobin metabolic process	0.0163886	AHSP,ALAS2	rna_Spleen_c20,rna_Spleen_c5,rna_Spleen_c8,rna_Thymus_c16,rna_Liver_c14
ACP1	cluster_18	No	GO:0030185	BP	nitric oxide transport	0.0368221	HBA1,HBB	rna_Spleen_c20,rna_Spleen_c5,rna_Spleen_c8,rna_Thymus_c16,rna_Liver_c14
ACP1	cluster_18	No	GO:0030218	BP	erythrocyte differentiation	0.0162339	AHSP,ALAS2,KLF1	rna_Spleen_c20,rna_Spleen_c5,rna_Spleen_c8,rna_Thymus_c16,rna_Liver_c14
ACP1	cluster_18	No	GO:0034755	BP	iron ion transmembrane transport	0.0163886	SLC25A37,SLC40A1	rna_Spleen_c20,rna_Spleen_c5,rna_Spleen_c8,rna_Thymus_c16,rna_Liver_c14
ACP1	cluster_18	No	GO:0042743	BP	hydrogen peroxide metabolic process	0.0163886	HBA1,HBB,HBM	rna_Spleen_c20,rna_Spleen_c5,rna_Spleen_c8,rna_Thymus_c16,rna_Liver_c14
ACP1	cluster_18	No	GO:0042744	BP	hydrogen peroxide catabolic process	0.0163886	HBA1,HBB,HBM	rna_Spleen_c20,rna_Spleen_c5,rna_Spleen_c8,rna_Thymus_c16,rna_Liver_c14
ACP1	cluster_18	No	GO:0046916	BP	cellular transition metal ion homeostasis	0.00841762	ALAS2,FTH1,SLC40A1,TFRC	rna_Spleen_c20,rna_Spleen_c5,rna_Spleen_c8,rna_Thymus_c16,rna_Liver_c14
ACP1	cluster_18	No	GO:0055072	BP	iron ion homeostasis	0.00143205	ALAS2,FTH1,SLC40A1,TFRC	rna_Spleen_c20,rna_Spleen_c5,rna_Spleen_c8,rna_Thymus_c16,rna_Liver_c14
ACP1	cluster_18	No	GO:0055076	BP	transition metal ion homeostasis	0.00841762	ALAS2,FTH1,SLC40A1,TFRC	rna_Spleen_c20,rna_Spleen_c5,rna_Spleen_c8,rna_Thymus_c16,rna_Liver_c14
ACP1	cluster_18	No	GO:0071702	BP	organic substance transport	0.0163886	ARL4A,CD36,HNRNPA2B1,OPTN,PIP4K2A,SEC14L1,SLC4A1,TFRC	rna_Spleen_c20,rna_Spleen_c5,rna_Spleen_c8,rna_Thymus_c16,rna_Liver_c14
ACP1	cluster_18	No	GO:0071705	BP	nitrogen compound transport	0.00270002	ARL4A,CD36,HBA1,HBB,HNRNPA2B1,OPTN,SEC14L1,TFRC	rna_Spleen_c20,rna_Spleen_c5,rna_Spleen_c8,rna_Thymus_c16,rna_Liver_c14
ACP1	cluster_18	No	GO:0072593	BP	reactive oxygen species metabolic process	0.00550608	CCS,HBA1,HBB,HBM	rna_Spleen_c20,rna_Spleen_c5,rna_Spleen_c8,rna_Thymus_c16,rna_Liver_c14
ACP1	cluster_18	No	GO:0097066	BP	response to thyroid hormone	0.0163886	CTSB,CTSL	rna_Spleen_c20,rna_Spleen_c5,rna_Spleen_c8,rna_Thymus_c16,rna_Liver_c14
ACP1	cluster_18	No	GO:0097067	BP	cellular response to thyroid hormone stimulus	0.0163886	CTSB,CTSL	rna_Spleen_c20,rna_Spleen_c5,rna_Spleen_c8,rna_Thymus_c16,rna_Liver_c14
ACP1	cluster_19	No	GO:0001959	BP	regulation of cytokine-mediated signaling pathway	0.00532347	HSPA1A,HSPA1B,SIGIRR,YTHDF2	rna_Thymus_c7
ACP1	cluster_19	No	GO:0006139	BP	nucleobase-containing compound metabolic process	8.31034e-05	GIMAP7,GTF2A1,HSPA1A,HSPA1B,SF3B6,TAF4B,TAF9,TCEA1,WDR48,YTHDF2	rna_Thymus_c7
ACP1	cluster_19	No	GO:0006351	BP	transcription, DNA-templated	0.00500127	GTF2A1,TAF4B,TAF9,TCEA1	rna_Thymus_c7
ACP1	cluster_19	No	GO:0006366	BP	transcription by RNA polymerase II	0.00128486	GTF2A1,TAF4B,TAF9,TCEA1	rna_Thymus_c7
ACP1	cluster_19	No	GO:0006401	BP	RNA catabolic process	0.00979313	HSPA1A,HSPA1B,YTHDF2	rna_Thymus_c7
ACP1	cluster_19	No	GO:0006402	BP	mRNA catabolic process	0.00479964	HSPA1A,HSPA1B,YTHDF2	rna_Thymus_c7
ACP1	cluster_19	No	GO:0006457	BP	protein folding	0.0159848	DNAJC2,HSPA1A,HSPA1B	rna_Thymus_c7
ACP1	cluster_19	No	GO:0006458	BP	'de novo' protein folding	0.00112021	DNAJC2,HSPA1A,HSPA1B	rna_Thymus_c7
ACP1	cluster_19	No	GO:0006974	BP	cellular response to DNA damage stimulus	0.0211397	CBX3,CRIP1,TAF9,WDR48	rna_Thymus_c7
ACP1	cluster_19	No	GO:0006979	BP	response to oxidative stress	0.0102483	AIF1,HSPA1A,HSPA1B,PRDX6	rna_Thymus_c7
ACP1	cluster_19	No	GO:0009059	BP	macromolecule biosynthetic process	0.00981187	GTF2A1,NDUFA7,TAF4B,TAF9,TCEA1	rna_Thymus_c7
ACP1	cluster_19	No	GO:0009299	BP	mRNA transcription	0.0417433	TAF4B,TAF9	rna_Thymus_c7
ACP1	cluster_19	No	GO:0009894	BP	regulation of catabolic process	0.00646218	BCAP31,HSPA1A,HSPA1B,PSMC5,TAF9,YTHDF2	rna_Thymus_c7
ACP1	cluster_19	No	GO:0009896	BP	positive regulation of catabolic process	0.00508039	BCAP31,HSPA1A,HSPA1B,PSMC5,YTHDF2	rna_Thymus_c7
ACP1	cluster_19	No	GO:0010286	BP	heat acclimation	0.00500127	HSPA1A,HSPA1B	rna_Thymus_c7
ACP1	cluster_19	No	GO:0010564	BP	regulation of cell cycle process	0.0159848	AIF1,BUB3,HSPA1A,HSPA1B,YTHDF2	rna_Thymus_c7
ACP1	cluster_19	No	GO:0010628	BP	positive regulation of gene expression	0.0224687	AIF1,HSPA1A,HSPA1B,PRDX6,SLC38A2,SOX4,YTHDF2	rna_Thymus_c7
ACP1	cluster_19	No	GO:0010968	BP	regulation of microtubule nucleation	0.00500127	HSPA1A,HSPA1B	rna_Thymus_c7
ACP1	cluster_19	No	GO:0016070	BP	RNA metabolic process	8.31034e-05	GTF2A1,HSPA1A,HSPA1B,SF3B6,TAF4B,TAF9,TCEA1,YTHDF2	rna_Thymus_c7
ACP1	cluster_19	No	GO:0016071	BP	mRNA metabolic process	5.00538e-05	HSPA1A,HSPA1B,SF3B6,TAF4B,TAF9,YTHDF2	rna_Thymus_c7
ACP1	cluster_19	No	GO:0016579	BP	protein deubiquitination	0.0312938	TAF9,WDR48	rna_Thymus_c7
ACP1	cluster_19	No	GO:0030162	BP	regulation of proteolysis	0.00471368	BCAP31,HSPA1A,HSPA1B,PSMC5,TAF9,WDR48	rna_Thymus_c7
ACP1	cluster_19	No	GO:0031110	BP	regulation of microtubule polymerization or depolymerization	0.0115411	HSPA1A,HSPA1B,STMN1	rna_Thymus_c7
ACP1	cluster_19	No	GO:0031112	BP	positive regulation of microtubule polymerization or depolymerization	0.0417433	HSPA1A,HSPA1B	rna_Thymus_c7
ACP1	cluster_19	No	GO:0031113	BP	regulation of microtubule polymerization	0.00263948	HSPA1A,HSPA1B,STMN1	rna_Thymus_c7
ACP1	cluster_19	No	GO:0031116	BP	positive regulation of microtubule polymerization	0.0312938	HSPA1A,HSPA1B	rna_Thymus_c7
ACP1	cluster_19	No	GO:0031329	BP	regulation of cellular catabolic process	0.00427282	BCAP31,HSPA1A,HSPA1B,PSMC5,TAF9,YTHDF2	rna_Thymus_c7
ACP1	cluster_19	No	GO:0031331	BP	positive regulation of cellular catabolic process	0.00273348	BCAP31,HSPA1A,HSPA1B,PSMC5,YTHDF2	rna_Thymus_c7
ACP1	cluster_19	No	GO:0031396	BP	regulation of protein ubiquitination	0.000255319	BUB3,HSPA1A,HSPA1B,SOX4	rna_Thymus_c7
ACP1	cluster_19	No	GO:0031397	BP	negative regulation of protein ubiquitination	4.30933e-05	BUB3,HSPA1A,HSPA1B,SOX4	rna_Thymus_c7
ACP1	cluster_19	No	GO:0031647	BP	regulation of protein stability	0.00449673	HSPA1A,HSPA1B,SOX4,TAF9	rna_Thymus_c7
ACP1	cluster_19	No	GO:0032269	BP	negative regulation of cellular protein metabolic process	0.00979313	BUB3,HSPA1A,HSPA1B,SOX4,TAF9,YTHDF2	rna_Thymus_c7
ACP1	cluster_19	No	GO:0032271	BP	regulation of protein polymerization	0.0417433	HSPA1A,HSPA1B,STMN1	rna_Thymus_c7
ACP1	cluster_19	No	GO:0032434	BP	regulation of proteasomal ubiquitin-dependent protein catabolic process	0.000467741	BCAP31,HSPA1A,HSPA1B,TAF9	rna_Thymus_c7
ACP1	cluster_19	No	GO:0032436	BP	positive regulation of proteasomal ubiquitin-dependent protein catabolic process	0.00662837	BCAP31,HSPA1A,HSPA1B	rna_Thymus_c7
ACP1	cluster_19	No	GO:0032774	BP	RNA biosynthetic process	0.00732029	GTF2A1,TAF4B,TAF9,TCEA1	rna_Thymus_c7
ACP1	cluster_19	No	GO:0032886	BP	regulation of microtubule-based process	0.0444989	HSPA1A,HSPA1B,STMN1	rna_Thymus_c7
ACP1	cluster_19	No	GO:0033120	BP	positive regulation of RNA splicing	0.00112021	HSPA1A,PRDX6,SLC38A2	rna_Thymus_c7
ACP1	cluster_19	No	GO:0033554	BP	cellular response to stress	0.000607077	AIF1,BCAP31,CBX3,CRIP1,HSPA1A,HSPA1B,TAF9,WDR48	rna_Thymus_c7
ACP1	cluster_19	No	GO:0034599	BP	cellular response to oxidative stress	0.0187598	AIF1,HSPA1A,HSPA1B	rna_Thymus_c7
ACP1	cluster_19	No	GO:0034605	BP	cellular response to heat	0.0417433	HSPA1A,HSPA1B	rna_Thymus_c7
ACP1	cluster_19	No	GO:0034620	BP	cellular response to unfolded protein	0.0312938	HSPA1A,HSPA1B	rna_Thymus_c7
ACP1	cluster_19	No	GO:0034654	BP	nucleobase-containing compound biosynthetic process	0.0325102	GTF2A1,TAF4B,TAF9,TCEA1	rna_Thymus_c7
ACP1	cluster_19	No	GO:0034655	BP	nucleobase-containing compound catabolic process	0.0312938	HSPA1A,HSPA1B,YTHDF2	rna_Thymus_c7
ACP1	cluster_19	No	GO:0035967	BP	cellular response to topologically incorrect protein	0.0417433	HSPA1A,HSPA1B	rna_Thymus_c7
ACP1	cluster_19	No	GO:0042026	BP	protein refolding	0.0115411	HSPA1A,HSPA1B	rna_Thymus_c7
ACP1	cluster_19	No	GO:0042176	BP	regulation of protein catabolic process	0.00171423	BCAP31,HSPA1A,HSPA1B,PSMC5,TAF9	rna_Thymus_c7
ACP1	cluster_19	No	GO:0042789	BP	mRNA transcription by RNA polymerase II	0.0312938	TAF4B,TAF9	rna_Thymus_c7
ACP1	cluster_19	No	GO:0043484	BP	regulation of RNA splicing	0.0159848	HSPA1A,PRDX6,SLC38A2	rna_Thymus_c7
ACP1	cluster_19	No	GO:0044265	BP	cellular macromolecule catabolic process	0.0384365	HSPA1A,HSPA1B,PSMC5,YTHDF2	rna_Thymus_c7
ACP1	cluster_19	No	GO:0044271	BP	cellular nitrogen compound biosynthetic process	0.0332784	GTF2A1,NDUFA7,TAF4B,TAF9,TCEA1	rna_Thymus_c7
ACP1	cluster_19	No	GO:0045648	BP	positive regulation of erythrocyte differentiation	0.0312938	HSPA1A,HSPA1B	rna_Thymus_c7
ACP1	cluster_19	No	GO:0045732	BP	positive regulation of protein catabolic process	0.00862061	BCAP31,HSPA1A,HSPA1B,PSMC5	rna_Thymus_c7
ACP1	cluster_19	No	GO:0045862	BP	positive regulation of proteolysis	0.00273348	BCAP31,HSPA1A,HSPA1B,PSMC5,WDR48	rna_Thymus_c7
ACP1	cluster_19	No	GO:0045944	BP	positive regulation of transcription by RNA polymerase II	0.0380921	GABPB1,GTF2A1,SOX4,TAF4B,TAF9,TCEA1	rna_Thymus_c7
ACP1	cluster_19	No	GO:0050821	BP	protein stabilization	0.00218481	HSPA1A,HSPA1B,SOX4,TAF9	rna_Thymus_c7
ACP1	cluster_19	No	GO:0051084	BP	'de novo' posttranslational protein folding	0.0312938	HSPA1A,HSPA1B	rna_Thymus_c7
ACP1	cluster_19	No	GO:0051085	BP	chaperone cofactor-dependent protein refolding	0.0312938	HSPA1A,HSPA1B	rna_Thymus_c7
ACP1	cluster_19	No	GO:0051248	BP	negative regulation of protein metabolic process	0.0119683	BUB3,HSPA1A,HSPA1B,SOX4,TAF9,YTHDF2	rna_Thymus_c7
ACP1	cluster_19	No	GO:0060236	BP	regulation of mitotic spindle organization	0.0417433	HSPA1A,HSPA1B	rna_Thymus_c7
ACP1	cluster_19	No	GO:0060260	BP	regulation of transcription initiation from RNA polymerase II promoter	9.35441e-05	GTF2A1,TAF4B,TAF9	rna_Thymus_c7
ACP1	cluster_19	No	GO:0060261	BP	positive regulation of transcription initiation from RNA polymerase II promoter	9.35441e-05	GTF2A1,TAF4B,TAF9	rna_Thymus_c7
ACP1	cluster_19	No	GO:0060759	BP	regulation of response to cytokine stimulus	0.000467741	HSPA1A,HSPA1B,SIGIRR,TAF9,YTHDF2	rna_Thymus_c7
ACP1	cluster_19	No	GO:0060760	BP	positive regulation of response to cytokine stimulus	0.00479964	HSPA1A,HSPA1B,TAF9	rna_Thymus_c7
ACP1	cluster_19	No	GO:0061136	BP	regulation of proteasomal protein catabolic process	6.8895e-05	BCAP31,HSPA1A,HSPA1B,PSMC5,TAF9	rna_Thymus_c7
ACP1	cluster_19	No	GO:0062197	BP	cellular response to chemical stress	0.0312938	AIF1,HSPA1A,HSPA1B	rna_Thymus_c7
ACP1	cluster_19	No	GO:0070370	BP	cellular heat acclimation	0.00500127	HSPA1A,HSPA1B	rna_Thymus_c7
ACP1	cluster_19	No	GO:0070424	BP	regulation of nucleotide-binding oligomerization domain containing signaling pathway	0.00500127	HSPA1A,HSPA1B	rna_Thymus_c7
ACP1	cluster_19	No	GO:0070426	BP	positive regulation of nucleotide-binding oligomerization domain containing signaling pathway	0.00500127	HSPA1A,HSPA1B	rna_Thymus_c7
ACP1	cluster_19	No	GO:0070432	BP	regulation of nucleotide-binding oligomerization domain containing 2 signaling pathway	0.00500127	HSPA1A,HSPA1B	rna_Thymus_c7
ACP1	cluster_19	No	GO:0070434	BP	positive regulation of nucleotide-binding oligomerization domain containing 2 signaling pathway	0.00500127	HSPA1A,HSPA1B	rna_Thymus_c7
ACP1	cluster_19	No	GO:0070507	BP	regulation of microtubule cytoskeleton organization	0.0187598	HSPA1A,HSPA1B,STMN1	rna_Thymus_c7
ACP1	cluster_19	No	GO:0071383	BP	cellular response to steroid hormone stimulus	0.0417433	HSPA1A,HSPA1B	rna_Thymus_c7
ACP1	cluster_19	No	GO:0080134	BP	regulation of response to stress	0.00571584	BCAP31,DNAJC2,HSPA1A,SLC38A2,SOX4,TAF9,WDR48,YTHDF2	rna_Thymus_c7
ACP1	cluster_19	No	GO:0080135	BP	regulation of cellular response to stress	0.000337778	BCAP31,DNAJC2,HSPA1A,SLC38A2,SOX4,TAF9,WDR48	rna_Thymus_c7
ACP1	cluster_19	No	GO:0090063	BP	positive regulation of microtubule nucleation	0.00500127	HSPA1A,HSPA1B	rna_Thymus_c7
ACP1	cluster_19	No	GO:0090083	BP	regulation of inclusion body assembly	0.0211397	HSPA1A,HSPA1B	rna_Thymus_c7
ACP1	cluster_19	No	GO:0090084	BP	negative regulation of inclusion body assembly	0.0115411	HSPA1A,HSPA1B	rna_Thymus_c7
ACP1	cluster_19	No	GO:0090169	BP	regulation of spindle assembly	0.0115411	HSPA1A,HSPA1B	rna_Thymus_c7
ACP1	cluster_19	No	GO:0090224	BP	regulation of spindle organization	0.0417433	HSPA1A,HSPA1B	rna_Thymus_c7
ACP1	cluster_19	No	GO:0090304	BP	nucleic acid metabolic process	8.53641e-05	GTF2A1,HSPA1A,HSPA1B,SF3B6,TAF4B,TAF9,TCEA1,WDR48,YTHDF2	rna_Thymus_c7
ACP1	cluster_19	No	GO:0097659	BP	nucleic acid-templated transcription	0.00500127	GTF2A1,TAF4B,TAF9,TCEA1	rna_Thymus_c7
ACP1	cluster_19	No	GO:1901673	BP	regulation of mitotic spindle assembly	0.0115411	HSPA1A,HSPA1B	rna_Thymus_c7
ACP1	cluster_19	No	GO:1901800	BP	positive regulation of proteasomal protein catabolic process	0.000594076	BCAP31,HSPA1A,HSPA1B,PSMC5	rna_Thymus_c7
ACP1	cluster_19	No	GO:1903050	BP	regulation of proteolysis involved in cellular protein catabolic process	9.0904e-05	BCAP31,HSPA1A,HSPA1B,PSMC5,TAF9	rna_Thymus_c7
ACP1	cluster_19	No	GO:1903052	BP	positive regulation of proteolysis involved in cellular protein catabolic process	0.000594076	BCAP31,HSPA1A,HSPA1B,PSMC5	rna_Thymus_c7
ACP1	cluster_19	No	GO:1903265	BP	positive regulation of tumor necrosis factor-mediated signaling pathway	0.00500127	HSPA1A,HSPA1B	rna_Thymus_c7
ACP1	cluster_19	No	GO:1903320	BP	regulation of protein modification by small protein conjugation or removal	5.62777e-05	BUB3,HSPA1A,HSPA1B,SOX4,WDR48	rna_Thymus_c7
ACP1	cluster_19	No	GO:1903321	BP	negative regulation of protein modification by small protein conjugation or removal	4.30933e-05	BUB3,HSPA1A,HSPA1B,SOX4	rna_Thymus_c7
ACP1	cluster_19	No	GO:1903362	BP	regulation of cellular protein catabolic process	0.000113729	BCAP31,HSPA1A,HSPA1B,PSMC5,TAF9	rna_Thymus_c7
ACP1	cluster_19	No	GO:1903364	BP	positive regulation of cellular protein catabolic process	0.00112021	BCAP31,HSPA1A,HSPA1B,PSMC5	rna_Thymus_c7
ACP1	cluster_19	No	GO:2000058	BP	regulation of ubiquitin-dependent protein catabolic process	0.000752149	BCAP31,HSPA1A,HSPA1B,TAF9	rna_Thymus_c7
ACP1	cluster_19	No	GO:2000060	BP	positive regulation of ubiquitin-dependent protein catabolic process	0.00662837	BCAP31,HSPA1A,HSPA1B	rna_Thymus_c7
ACP1	cluster_19	No	GO:2000142	BP	regulation of DNA-templated transcription, initiation	9.35441e-05	GTF2A1,TAF4B,TAF9	rna_Thymus_c7
ACP1	cluster_19	No	GO:2000144	BP	positive regulation of DNA-templated transcription, initiation	9.35441e-05	GTF2A1,TAF4B,TAF9	rna_Thymus_c7
ACP1	cluster_19	No	GO:2001233	BP	regulation of apoptotic signaling pathway	0.0312938	BCAP31,HSPA1A,HSPA1B,TAF9	rna_Thymus_c7
ACP1	cluster_19	No	GO:2001242	BP	regulation of intrinsic apoptotic signaling pathway	0.0336668	BCAP31,HSPA1A,TAF9	rna_Thymus_c7
ACSL3	cluster_29	No	GO:0000122	BP	negative regulation of transcription by RNA polymerase II	0.0151654	EPC1,MBD2,MEF2C,TCF25,TFEC,ZHX2	rna_Thymus_c8,rna_Thymus_c13
ACSL3	cluster_29	No	GO:0002253	BP	activation of immune response	0.0466038	MEF2C,NFATC2,PAK2,PRKCE,RGCC	rna_Thymus_c8,rna_Thymus_c13
ACSL3	cluster_29	No	GO:0006468	BP	protein phosphorylation	0.00459717	DAPK1,ERC1,MATK,PAK2,PKN2,PRKCE	rna_Thymus_c8,rna_Thymus_c13
ACSL3	cluster_29	No	GO:0009890	BP	negative regulation of biosynthetic process	0.000752008	DAPK1,EPC1,MBD2,MEF2C,PID1,RFX3,TCF25,TFEC,ZHX2	rna_Thymus_c8,rna_Thymus_c13
ACSL3	cluster_29	No	GO:0010508	BP	positive regulation of autophagy	0.0153484	DAPK1,PIP4K2A,VPS13D	rna_Thymus_c8,rna_Thymus_c13
ACSL3	cluster_29	No	GO:0010558	BP	negative regulation of macromolecule biosynthetic process	0.00354308	DAPK1,EPC1,MBD2,MEF2C,RFX3,TCF25,TFEC,ZHX2	rna_Thymus_c8,rna_Thymus_c13
ACSL3	cluster_29	No	GO:0010629	BP	negative regulation of gene expression	0.0167318	ARRB1,DAPK1,EPC1,MBD2,MEF2C,RGCC	rna_Thymus_c8,rna_Thymus_c13
ACSL3	cluster_29	No	GO:0010632	BP	regulation of epithelial cell migration	0.0357771	BCAS3,MEF2C,PRKCE,RGCC	rna_Thymus_c8,rna_Thymus_c13
ACSL3	cluster_29	No	GO:0010638	BP	positive regulation of organelle organization	0.0126727	BCAS3,PIP4K2A,PRKCE,RGCC,VPS13D	rna_Thymus_c8,rna_Thymus_c13
ACSL3	cluster_29	No	GO:0010942	BP	positive regulation of cell death	0.0342424	DAPK1,MEF2C,PAK2,RGCC,TNFAIP8	rna_Thymus_c8,rna_Thymus_c13
ACSL3	cluster_29	No	GO:0016070	BP	RNA metabolic process	0.0434788	CDKAL1,DDX21,EPC1,NCOA1,SCAF11	rna_Thymus_c8,rna_Thymus_c13
ACSL3	cluster_29	No	GO:0016310	BP	phosphorylation	0.00683274	DAPK1,ERC1,MATK,PAK2,PKN2,PRKCE	rna_Thymus_c8,rna_Thymus_c13
ACSL3	cluster_29	No	GO:0018105	BP	peptidyl-serine phosphorylation	0.0422599	PAK2,PKN2,PRKCE	rna_Thymus_c8,rna_Thymus_c13
ACSL3	cluster_29	No	GO:0018193	BP	peptidyl-amino acid modification	0.00652686	ASPH,EPC1,KANSL1,PAK2,PKN2,PRKCE	rna_Thymus_c8,rna_Thymus_c13
ACSL3	cluster_29	No	GO:0018209	BP	peptidyl-serine modification	0.0422599	PAK2,PKN2,PRKCE	rna_Thymus_c8,rna_Thymus_c13
ACSL3	cluster_29	No	GO:0031327	BP	negative regulation of cellular biosynthetic process	0.000651395	DAPK1,EPC1,MBD2,MEF2C,PID1,RFX3,TCF25,TFEC,ZHX2	rna_Thymus_c8,rna_Thymus_c13
ACSL3	cluster_29	No	GO:0031331	BP	positive regulation of cellular catabolic process	0.0337203	DAPK1,PIP4K2A,VPS13D,ZC3HAV1	rna_Thymus_c8,rna_Thymus_c13
ACSL3	cluster_29	No	GO:0032956	BP	regulation of actin cytoskeleton organization	0.00319436	BCAS3,PAK2,PRKCE,RAC2,RGCC	rna_Thymus_c8,rna_Thymus_c13
ACSL3	cluster_29	No	GO:0032970	BP	regulation of actin filament-based process	0.00651832	BCAS3,PAK2,PRKCE,RAC2,RGCC	rna_Thymus_c8,rna_Thymus_c13
ACSL3	cluster_29	No	GO:0033043	BP	regulation of organelle organization	0.00012759	BCAS3,PAK2,PID1,PIP4K2A,PRKCE,RAC2,RGCC,TEX14,VPS13D	rna_Thymus_c8,rna_Thymus_c13
ACSL3	cluster_29	No	GO:0034762	BP	regulation of transmembrane transport	0.028078	DAPK1,MEF2C,PID1,PRKCE,UBASH3B	rna_Thymus_c8,rna_Thymus_c13
ACSL3	cluster_29	No	GO:0035556	BP	intracellular signal transduction	0.0053582	DAPK1,MEF2C,NFATC2,PAK2,PKN2,PRKCE,RAC2,TEX14	rna_Thymus_c8,rna_Thymus_c13
ACSL3	cluster_29	No	GO:0043065	BP	positive regulation of apoptotic process	0.0134248	DAPK1,MEF2C,PAK2,RGCC,TNFAIP8	rna_Thymus_c8,rna_Thymus_c13
ACSL3	cluster_29	No	GO:0043068	BP	positive regulation of programmed cell death	0.0156866	DAPK1,MEF2C,PAK2,RGCC,TNFAIP8	rna_Thymus_c8,rna_Thymus_c13
ACSL3	cluster_29	No	GO:0044087	BP	regulation of cellular component biogenesis	0.00532552	BCAS3,MEF2C,PAK2,PIP4K2A,PRKCE,RAC2,RGCC	rna_Thymus_c8,rna_Thymus_c13
ACSL3	cluster_29	No	GO:0044089	BP	positive regulation of cellular component biogenesis	0.0172692	BCAS3,PIP4K2A,PRKCE,RAC2,RGCC	rna_Thymus_c8,rna_Thymus_c13
ACSL3	cluster_29	No	GO:0044092	BP	negative regulation of molecular function	0.0367517	ARRB1,BCAS3,PAK2,PIP4K2A,PRKCE,UBASH3B	rna_Thymus_c8,rna_Thymus_c13
ACSL3	cluster_29	No	GO:0045814	BP	negative regulation of gene expression, epigenetic	0.0423964	EPC1,MBD2	rna_Thymus_c8,rna_Thymus_c13
ACSL3	cluster_29	No	GO:0045892	BP	negative regulation of transcription, DNA-templated	0.0106919	EPC1,MBD2,MEF2C,RFX3,TCF25,TFEC,ZHX2	rna_Thymus_c8,rna_Thymus_c13
ACSL3	cluster_29	No	GO:0045934	BP	negative regulation of nucleobase-containing compound metabolic process	0.00354308	EPC1,MBD2,MEF2C,PID1,RFX3,TCF25,TFEC,ZHX2	rna_Thymus_c8,rna_Thymus_c13
ACSL3	cluster_29	No	GO:0045944	BP	positive regulation of transcription by RNA polymerase II	1.53888e-05	ARRB1,BCAS3,ELF1,EPC1,MEF2C,NCOA1,PID1,RFX3,RGCC,TFEC	rna_Thymus_c8,rna_Thymus_c13
ACSL3	cluster_29	No	GO:0046627	BP	negative regulation of insulin receptor signaling pathway	0.0280033	PID1,PIP4K2A	rna_Thymus_c8,rna_Thymus_c13
ACSL3	cluster_29	No	GO:0051130	BP	positive regulation of cellular component organization	0.0105188	ARRB1,BCAS3,PIP4K2A,PRKCE,RAC2,RGCC,VPS13D	rna_Thymus_c8,rna_Thymus_c13
ACSL3	cluster_29	No	GO:0051253	BP	negative regulation of RNA metabolic process	0.0146106	EPC1,MBD2,MEF2C,RFX3,TCF25,TFEC,ZHX2	rna_Thymus_c8,rna_Thymus_c13
ACSL3	cluster_29	No	GO:0051493	BP	regulation of cytoskeleton organization	0.0165583	BCAS3,PAK2,PRKCE,RAC2,RGCC	rna_Thymus_c8,rna_Thymus_c13
ACSL3	cluster_29	No	GO:1900077	BP	negative regulation of cellular response to insulin stimulus	0.0280033	PID1,PIP4K2A	rna_Thymus_c8,rna_Thymus_c13
ACSL3	cluster_29	No	GO:1902679	BP	negative regulation of RNA biosynthetic process	0.0110055	EPC1,MBD2,MEF2C,RFX3,TCF25,TFEC,ZHX2	rna_Thymus_c8,rna_Thymus_c13
ACSL3	cluster_29	No	GO:1903507	BP	negative regulation of nucleic acid-templated transcription	0.0106919	EPC1,MBD2,MEF2C,RFX3,TCF25,TFEC,ZHX2	rna_Thymus_c8,rna_Thymus_c13
ACSL3	cluster_29	Yes	GO:0006793	BP	phosphorus metabolic process	0.000936564	DAPK1,ERC1,MATK,PAK2,PAPSS2,PIP4K2A,PKN2,PRKCE,UBASH3B	rna_Thymus_c8,rna_Thymus_c13
ACSL3	cluster_29	Yes	GO:0006796	BP	phosphate-containing compound metabolic process	0.000872412	DAPK1,ERC1,MATK,PAK2,PAPSS2,PIP4K2A,PKN2,PRKCE,UBASH3B	rna_Thymus_c8,rna_Thymus_c13
ACSL3	cluster_29	Yes	GO:0034654	BP	nucleobase-containing compound biosynthetic process	0.0450898	DDX21,EPC1,NCOA1,PAPSS2	rna_Thymus_c8,rna_Thymus_c13
ACSL3	cluster_38	No	GO:0006623	BP	protein targeting to vacuole	0.0446154	SORL1,VPS13D	rna_Kidney_c30
ACSL3	cluster_38	No	GO:0010950	BP	positive regulation of endopeptidase activity	0.00731967	ACER2,ASPH,DAPK1,PPARG	rna_Kidney_c30
ACSL3	cluster_38	No	GO:0010952	BP	positive regulation of peptidase activity	0.00849806	ACER2,ASPH,DAPK1,PPARG	rna_Kidney_c30
ACSL3	cluster_38	No	GO:0015031	BP	protein transport	0.0310822	ANK3,ARFIP1,PPARG,SORL1,VPS13D	rna_Kidney_c30
ACSL3	cluster_38	No	GO:0030162	BP	regulation of proteolysis	0.011264	ACER2,ASPH,DAPK1,PPARG,RPS6KA3,SORL1	rna_Kidney_c30
ACSL3	cluster_38	No	GO:0032269	BP	negative regulation of cellular protein metabolic process	0.0270961	ACER2,DAPK1,MGAT5,PPARG,RPS6KA3,SORL1	rna_Kidney_c30
ACSL3	cluster_38	No	GO:0032386	BP	regulation of intracellular transport	0.0498024	ANK3,ARFIP1,SORL1,UBAC2	rna_Kidney_c30
ACSL3	cluster_38	No	GO:0032507	BP	maintenance of protein location in cell	0.0180993	ANK3,SORL1,VPS13D	rna_Kidney_c30
ACSL3	cluster_38	No	GO:0033554	BP	cellular response to stress	0.0454307	ACER2,DAPK1,MACROD2,PPARG,RPS6KA3,XPR1	rna_Kidney_c30
ACSL3	cluster_38	No	GO:0034248	BP	regulation of cellular amide metabolic process	0.0180993	DAPK1,RPS6KA3,SORL1,TNRC6B	rna_Kidney_c30
ACSL3	cluster_38	No	GO:0034330	BP	cell junction organization	0.00475494	ANK3,CAPZA1,ERC1,PKHD1,PKN2,SDK1	rna_Kidney_c30
ACSL3	cluster_38	No	GO:0043085	BP	positive regulation of catalytic activity	0.0466767	ACER2,ASPH,DAPK1,IQGAP1,PPARG,SORL1,TBC1D22A	rna_Kidney_c30
ACSL3	cluster_38	No	GO:0043280	BP	positive regulation of cysteine-type endopeptidase activity involved in apoptotic process	0.0310822	ACER2,DAPK1,PPARG	rna_Kidney_c30
ACSL3	cluster_38	No	GO:0043281	BP	regulation of cysteine-type endopeptidase activity involved in apoptotic process	0.00849806	ACER2,DAPK1,PPARG,RPS6KA3	rna_Kidney_c30
ACSL3	cluster_38	No	GO:0045053	BP	protein retention in Golgi apparatus	0.013095	SORL1,VPS13D	rna_Kidney_c30
ACSL3	cluster_38	No	GO:0045184	BP	establishment of protein localization	0.040088	ANK3,ARFIP1,PPARG,SORL1,VPS13D	rna_Kidney_c30
ACSL3	cluster_38	No	GO:0045185	BP	maintenance of protein location	0.0296104	ANK3,SORL1,VPS13D	rna_Kidney_c30
ACSL3	cluster_38	No	GO:0045862	BP	positive regulation of proteolysis	0.0498024	ACER2,ASPH,DAPK1,PPARG	rna_Kidney_c30
ACSL3	cluster_38	No	GO:0051248	BP	negative regulation of protein metabolic process	0.0303904	ACER2,DAPK1,MGAT5,PPARG,RPS6KA3,SORL1	rna_Kidney_c30
ACSL3	cluster_38	No	GO:0051336	BP	regulation of hydrolase activity	0.00418246	ACER2,ASPH,DAPK1,MGAT5,PPARG,RPS6KA3,SORL1,TBC1D22A	rna_Kidney_c30
ACSL3	cluster_38	No	GO:0051641	BP	cellular localization	0.00418246	ANK3,ARFIP1,ERC1,MYO1E,PKHD1,SORL1,SYTL2,UBAC2,VPS13D	rna_Kidney_c30
ACSL3	cluster_38	No	GO:0051651	BP	maintenance of location in cell	0.0408979	ANK3,SORL1,VPS13D	rna_Kidney_c30
ACSL3	cluster_38	No	GO:0052547	BP	regulation of peptidase activity	0.00310406	ACER2,ASPH,DAPK1,PPARG,RPS6KA3,SORL1	rna_Kidney_c30
ACSL3	cluster_38	No	GO:0052548	BP	regulation of endopeptidase activity	0.00215295	ACER2,ASPH,DAPK1,PPARG,RPS6KA3,SORL1	rna_Kidney_c30
ACSL3	cluster_38	No	GO:2000116	BP	regulation of cysteine-type endopeptidase activity	0.00259038	ACER2,ASPH,DAPK1,PPARG,RPS6KA3	rna_Kidney_c30
ACSL3	cluster_38	No	GO:2001056	BP	positive regulation of cysteine-type endopeptidase activity	0.00418246	ACER2,ASPH,DAPK1,PPARG	rna_Kidney_c30
ACSL3	cluster_38	Yes	GO:0051223	BP	regulation of protein transport	0.0296681	ANK3,ARFIP1,PPARG,SORL1,UBAC2	rna_Kidney_c30
ACSL3	cluster_38	Yes	GO:0070201	BP	regulation of establishment of protein localization	0.0312491	ANK3,ARFIP1,PPARG,SORL1,UBAC2	rna_Kidney_c30
ACSM2A	cluster_14	No	GO:0002181	BP	cytoplasmic translation	0.0170316	RPL4,RPS12,RPS28	spatial_Kidney_c61,slide_Kidney_c61
ACSM2A	cluster_14	No	GO:0006412	BP	translation	0.0331515	RPL4,RPS12,RPS28	spatial_Kidney_c61,slide_Kidney_c61
ACSM2A	cluster_14	No	GO:0006875	BP	cellular metal ion homeostasis	0.0331515	CD24,FTH1,MT1G,MT1H,MT1X,MT2A	spatial_Kidney_c61,slide_Kidney_c61
ACSM2A	cluster_14	No	GO:0006882	BP	cellular zinc ion homeostasis	0.000288413	MT1G,MT1H,MT1X,MT2A	spatial_Kidney_c61,slide_Kidney_c61
ACSM2A	cluster_14	No	GO:0010035	BP	response to inorganic substance	0.032267	FABP1,MT1G,MT1H,MT1X,MT2A	spatial_Kidney_c61,slide_Kidney_c61
ACSM2A	cluster_14	No	GO:0010043	BP	response to zinc ion	0.000712958	MT1G,MT1H,MT1X,MT2A	spatial_Kidney_c61,slide_Kidney_c61
ACSM2A	cluster_14	No	GO:0010273	BP	detoxification of copper ion	0.000271491	MT1G,MT1H,MT1X,MT2A	spatial_Kidney_c61,slide_Kidney_c61
ACSM2A	cluster_14	No	GO:0019725	BP	cellular homeostasis	0.028292	CD24,FTH1,MT1G,MT1H,MT1X,MT2A,SLC12A1	spatial_Kidney_c61,slide_Kidney_c61
ACSM2A	cluster_14	No	GO:0034645	BP	cellular macromolecule biosynthetic process	0.0170316	APOE,RPL4,RPS12,RPS28	spatial_Kidney_c61,slide_Kidney_c61
ACSM2A	cluster_14	No	GO:0036017	BP	response to erythropoietin	0.0170316	MT1X,MT2A	spatial_Kidney_c61,slide_Kidney_c61
ACSM2A	cluster_14	No	GO:0036018	BP	cellular response to erythropoietin	0.0170316	MT1X,MT2A	spatial_Kidney_c61,slide_Kidney_c61
ACSM2A	cluster_14	No	GO:0040008	BP	regulation of growth	0.0331515	APOE,MT1G,MT1H,MT1X,MT2A	spatial_Kidney_c61,slide_Kidney_c61
ACSM2A	cluster_14	No	GO:0043604	BP	amide biosynthetic process	0.0155394	CERS3,RPL4,RPS12,RPS28	spatial_Kidney_c61,slide_Kidney_c61
ACSM2A	cluster_14	No	GO:0045926	BP	negative regulation of growth	0.0331515	MT1G,MT1H,MT1X,MT2A	spatial_Kidney_c61,slide_Kidney_c61
ACSM2A	cluster_14	No	GO:0046686	BP	response to cadmium ion	0.000322732	MT1G,MT1H,MT1X,MT2A	spatial_Kidney_c61,slide_Kidney_c61
ACSM2A	cluster_14	No	GO:0046688	BP	response to copper ion	0.000514615	MT1G,MT1H,MT1X,MT2A	spatial_Kidney_c61,slide_Kidney_c61
ACSM2A	cluster_14	No	GO:0046916	BP	cellular transition metal ion homeostasis	0.000428706	FTH1,MT1G,MT1H,MT1X,MT2A	spatial_Kidney_c61,slide_Kidney_c61
ACSM2A	cluster_14	No	GO:0050801	BP	ion homeostasis	0.0207522	CD24,FTH1,MT1G,MT1H,MT1X,MT2A,SLC12A1	spatial_Kidney_c61,slide_Kidney_c61
ACSM2A	cluster_14	No	GO:0055065	BP	metal ion homeostasis	0.00989375	CD24,FTH1,MT1G,MT1H,MT1X,MT2A,SLC12A1	spatial_Kidney_c61,slide_Kidney_c61
ACSM2A	cluster_14	No	GO:0055069	BP	zinc ion homeostasis	0.000288413	MT1G,MT1H,MT1X,MT2A	spatial_Kidney_c61,slide_Kidney_c61
ACSM2A	cluster_14	No	GO:0055076	BP	transition metal ion homeostasis	0.000428706	FTH1,MT1G,MT1H,MT1X,MT2A	spatial_Kidney_c61,slide_Kidney_c61
ACSM2A	cluster_14	No	GO:0055080	BP	cation homeostasis	0.0170316	CD24,FTH1,MT1G,MT1H,MT1X,MT2A,SLC12A1	spatial_Kidney_c61,slide_Kidney_c61
ACSM2A	cluster_14	No	GO:0061687	BP	detoxification of inorganic compound	0.000271491	MT1G,MT1H,MT1X,MT2A	spatial_Kidney_c61,slide_Kidney_c61
ACSM2A	cluster_14	No	GO:0071241	BP	cellular response to inorganic substance	0.036812	MT1G,MT1H,MT1X,MT2A	spatial_Kidney_c61,slide_Kidney_c61
ACSM2A	cluster_14	No	GO:0071248	BP	cellular response to metal ion	0.0331515	MT1G,MT1H,MT1X,MT2A	spatial_Kidney_c61,slide_Kidney_c61
ACSM2A	cluster_14	No	GO:0071276	BP	cellular response to cadmium ion	0.000322732	MT1G,MT1H,MT1X,MT2A	spatial_Kidney_c61,slide_Kidney_c61
ACSM2A	cluster_14	No	GO:0071280	BP	cellular response to copper ion	0.000514615	MT1G,MT1H,MT1X,MT2A	spatial_Kidney_c61,slide_Kidney_c61
ACSM2A	cluster_14	No	GO:0071294	BP	cellular response to zinc ion	0.000322732	MT1G,MT1H,MT1X,MT2A	spatial_Kidney_c61,slide_Kidney_c61
ACSM2A	cluster_14	No	GO:0098754	BP	detoxification	0.000514615	MT1G,MT1H,MT1X,MT2A	spatial_Kidney_c61,slide_Kidney_c61
ACSM2A	cluster_14	No	GO:0098771	BP	inorganic ion homeostasis	0.0170316	CD24,FTH1,MT1G,MT1H,MT1X,MT2A,SLC12A1	spatial_Kidney_c61,slide_Kidney_c61
ACSM2A	cluster_14	No	GO:1905906	BP	regulation of amyloid fibril formation	0.0347972	APOE,CRYAB	spatial_Kidney_c61,slide_Kidney_c61
ACSM2A	cluster_14	No	GO:1905907	BP	negative regulation of amyloid fibril formation	0.0347972	APOE,CRYAB	spatial_Kidney_c61,slide_Kidney_c61
ACSM2A	cluster_14	Yes	GO:0043603	BP	cellular amide metabolic process	0.0194131	ACSM2B,CERS3,RPL4,RPS12,RPS28	spatial_Kidney_c61,slide_Kidney_c61
ACSM2A	cluster_14	Yes	GO:0048878	BP	chemical homeostasis	0.0170316	APOE,CD24,FTH1,MT1G,MT1H,MT1X,MT2A,SLC12A1	spatial_Kidney_c61,slide_Kidney_c61
ACSM2A	cluster_6	No	GO:0006760	BP	folic acid-containing compound metabolic process	0.012652	FTCD,SHMT1	rna_Liver_c13,rna_Liver_c0,rna_Liver_c4,rna_Liver_c1,rna_Liver_c12
ACSM2A	cluster_6	No	GO:0006766	BP	vitamin metabolic process	0.0448303	ALDH1A2,RGN,SHMT1	rna_Liver_c13,rna_Liver_c0,rna_Liver_c4,rna_Liver_c1,rna_Liver_c12
ACSM2A	cluster_6	No	GO:0006953	BP	acute-phase response	0.0281339	LBP,SIGIRR	rna_Liver_c13,rna_Liver_c0,rna_Liver_c4,rna_Liver_c1,rna_Liver_c12
ACSM2A	cluster_6	No	GO:0008652	BP	cellular amino acid biosynthetic process	0.012652	PAH,SHMT1	rna_Liver_c13,rna_Liver_c0,rna_Liver_c4,rna_Liver_c1,rna_Liver_c12
ACSM2A	cluster_6	No	GO:0042558	BP	pteridine-containing compound metabolic process	0.0281339	FTCD,SHMT1	rna_Liver_c13,rna_Liver_c0,rna_Liver_c4,rna_Liver_c1,rna_Liver_c12
ACSM2A	cluster_6	No	GO:0042573	BP	retinoic acid metabolic process	0.0453847	ALDH1A2,CYP3A5	rna_Liver_c13,rna_Liver_c0,rna_Liver_c4,rna_Liver_c1,rna_Liver_c12
ACSM2A	cluster_6	No	GO:0044271	BP	cellular nitrogen compound biosynthetic process	0.0135647	NAMPT,NDUFA7,PAH,RPS28,SHMT1,SOX5	rna_Liver_c13,rna_Liver_c0,rna_Liver_c4,rna_Liver_c1,rna_Liver_c12
ACSM2A	cluster_6	No	GO:0060267	BP	positive regulation of respiratory burst	0.0453847	INSR,LBP	rna_Liver_c13,rna_Liver_c0,rna_Liver_c4,rna_Liver_c1,rna_Liver_c12
ACSM2A	cluster_6	No	GO:0065003	BP	protein-containing complex assembly	0.027894	ALDH1A2,ALDOB,MAGI1,RPS28,SHMT1,XRCC5	rna_Liver_c13,rna_Liver_c0,rna_Liver_c4,rna_Liver_c1,rna_Liver_c12
ACSM2A	cluster_6	No	GO:0090304	BP	nucleic acid metabolic process	0.0101765	A1CF,HNRNPA2B1,RAN,RPS28,SF3B6,SOX5,XRCC5	rna_Liver_c13,rna_Liver_c0,rna_Liver_c4,rna_Liver_c1,rna_Liver_c12
ACSM2A	cluster_6	No	GO:1901362	BP	organic cyclic compound biosynthetic process	0.0448987	NAMPT,PAH,RGN,SHMT1,SOX5	rna_Liver_c13,rna_Liver_c0,rna_Liver_c4,rna_Liver_c1,rna_Liver_c12
ACSM2A	cluster_6	No	GO:1901566	BP	organonitrogen compound biosynthetic process	0.0453847	NAMPT,NDUFA7,PAH,RPS28,SHMT1	rna_Liver_c13,rna_Liver_c0,rna_Liver_c4,rna_Liver_c1,rna_Liver_c12
ACSM2A	cluster_6	No	GO:1901607	BP	alpha-amino acid biosynthetic process	0.012652	PAH,SHMT1	rna_Liver_c13,rna_Liver_c0,rna_Liver_c4,rna_Liver_c1,rna_Liver_c12
ACSM2A	cluster_6	No	GO:2000112	BP	regulation of cellular macromolecule biosynthetic process	0.0162134	HNRNPA2B1,INSR,RAMP1,SHMT1,XRCC5	rna_Liver_c13,rna_Liver_c0,rna_Liver_c4,rna_Liver_c1,rna_Liver_c12
ACSM2A	cluster_6	Yes	GO:0006082	BP	organic acid metabolic process	4.84864e-05	ACSM2B,ALDH1A2,ALDOB,CYP3A5,CYP4A11,PAH,RGN,SHMT1	rna_Liver_c13,rna_Liver_c0,rna_Liver_c4,rna_Liver_c1,rna_Liver_c12
ACSM2A	cluster_6	Yes	GO:0006139	BP	nucleobase-containing compound metabolic process	1.59495e-05	A1CF,ACSM2B,ALDOB,HNRNPA2B1,NAMPT,RAN,RPS28,SF3B6,SHMT1,SOX5,XRCC5	rna_Liver_c13,rna_Liver_c0,rna_Liver_c4,rna_Liver_c1,rna_Liver_c12
ACSM2A	cluster_6	Yes	GO:0006753	BP	nucleoside phosphate metabolic process	0.0135647	ACSM2B,ALDOB,NAMPT,RAN	rna_Liver_c13,rna_Liver_c0,rna_Liver_c4,rna_Liver_c1,rna_Liver_c12
ACSM2A	cluster_6	Yes	GO:0009058	BP	biosynthetic process	0.000308723	ACSM2B,ALDH1A2,CYP4A11,NAMPT,NDUFA7,PAH,RGN,RPS28,SHMT1,SOX5	rna_Liver_c13,rna_Liver_c0,rna_Liver_c4,rna_Liver_c1,rna_Liver_c12
ACSM2A	cluster_6	Yes	GO:0009117	BP	nucleotide metabolic process	0.012652	ACSM2B,ALDOB,NAMPT,RAN	rna_Liver_c13,rna_Liver_c0,rna_Liver_c4,rna_Liver_c1,rna_Liver_c12
ACSM2A	cluster_6	Yes	GO:0016053	BP	organic acid biosynthetic process	4.24412e-05	ACSM2B,ALDH1A2,CYP4A11,PAH,RGN,SHMT1	rna_Liver_c13,rna_Liver_c0,rna_Liver_c4,rna_Liver_c1,rna_Liver_c12
ACSM2A	cluster_6	Yes	GO:0019752	BP	carboxylic acid metabolic process	3.7823e-05	ACSM2B,ALDH1A2,ALDOB,CYP3A5,CYP4A11,PAH,RGN,SHMT1	rna_Liver_c13,rna_Liver_c0,rna_Liver_c4,rna_Liver_c1,rna_Liver_c12
ACSM2A	cluster_6	Yes	GO:0032787	BP	monocarboxylic acid metabolic process	0.0094228	ACSM2B,ALDH1A2,ALDOB,CYP3A5,CYP4A11	rna_Liver_c13,rna_Liver_c0,rna_Liver_c4,rna_Liver_c1,rna_Liver_c12
ACSM2A	cluster_6	Yes	GO:0043436	BP	oxoacid metabolic process	3.91217e-05	ACSM2B,ALDH1A2,ALDOB,CYP3A5,CYP4A11,PAH,RGN,SHMT1	rna_Liver_c13,rna_Liver_c0,rna_Liver_c4,rna_Liver_c1,rna_Liver_c12
ACSM2A	cluster_6	Yes	GO:0044249	BP	cellular biosynthetic process	0.000195292	ACSM2B,ALDH1A2,CYP4A11,NAMPT,NDUFA7,PAH,RGN,RPS28,SHMT1,SOX5	rna_Liver_c13,rna_Liver_c0,rna_Liver_c4,rna_Liver_c1,rna_Liver_c12
ACSM2A	cluster_6	Yes	GO:0044281	BP	small molecule metabolic process	4.99116e-05	ACSM2B,ALDH1A2,ALDOB,CYP3A5,CYP4A11,NAMPT,PAH,RAN,RGN,SHMT1	rna_Liver_c13,rna_Liver_c0,rna_Liver_c4,rna_Liver_c1,rna_Liver_c12
ACSM2A	cluster_6	Yes	GO:0044283	BP	small molecule biosynthetic process	0.000605108	ACSM2B,ALDH1A2,CYP4A11,PAH,RGN,SHMT1	rna_Liver_c13,rna_Liver_c0,rna_Liver_c4,rna_Liver_c1,rna_Liver_c12
ACSM2A	cluster_6	Yes	GO:0046394	BP	carboxylic acid biosynthetic process	4.24412e-05	ACSM2B,ALDH1A2,CYP4A11,PAH,RGN,SHMT1	rna_Liver_c13,rna_Liver_c0,rna_Liver_c4,rna_Liver_c1,rna_Liver_c12
ACSM2A	cluster_6	Yes	GO:0055086	BP	nucleobase-containing small molecule metabolic process	0.0022516	ACSM2B,ALDOB,NAMPT,RAN,SHMT1	rna_Liver_c13,rna_Liver_c0,rna_Liver_c4,rna_Liver_c1,rna_Liver_c12
ACSM2A	cluster_6	Yes	GO:0072521	BP	purine-containing compound metabolic process	0.00820502	ACSM2B,ALDOB,RAN,SHMT1	rna_Liver_c13,rna_Liver_c0,rna_Liver_c4,rna_Liver_c1,rna_Liver_c12
ACSM2A	cluster_6	Yes	GO:1901576	BP	organic substance biosynthetic process	0.000240347	ACSM2B,ALDH1A2,CYP4A11,NAMPT,NDUFA7,PAH,RGN,RPS28,SHMT1,SOX5	rna_Liver_c13,rna_Liver_c0,rna_Liver_c4,rna_Liver_c1,rna_Liver_c12
ACSM3	cluster_2	No	GO:0000209	BP	protein polyubiquitination	0.0038337	DTL,SMURF2,TNKS,WWP2	rna_Lymph_Node_c6,rna_Lymph_Node_c21
ACSM3	cluster_2	No	GO:0006471	BP	protein ADP-ribosylation	0.0381494	PARP16,TNKS	rna_Lymph_Node_c6,rna_Lymph_Node_c21
ACSM3	cluster_2	No	GO:0006473	BP	protein acetylation	0.0155699	ATF2,NAA15,NAA35	rna_Lymph_Node_c6,rna_Lymph_Node_c21
ACSM3	cluster_2	No	GO:0006474	BP	N-terminal protein amino acid acetylation	0.0105434	NAA15,NAA35	rna_Lymph_Node_c6,rna_Lymph_Node_c21
ACSM3	cluster_2	No	GO:0006886	BP	intracellular protein transport	0.0370403	CD24,NUP214,RAB31,SORL1	rna_Lymph_Node_c6,rna_Lymph_Node_c21
ACSM3	cluster_2	No	GO:0008283	BP	cell population proliferation	0.0449508	ABCB1,CD70,EGR1,NAA35	rna_Lymph_Node_c6,rna_Lymph_Node_c21
ACSM3	cluster_2	No	GO:0016567	BP	protein ubiquitination	0.00680089	DTL,RNF38,SMURF2,TNKS,WWP2	rna_Lymph_Node_c6,rna_Lymph_Node_c21
ACSM3	cluster_2	No	GO:0018130	BP	heterocycle biosynthetic process	0.0163757	ACSL3,DTL,ICE1,PARP16,TCEA1	rna_Lymph_Node_c6,rna_Lymph_Node_c21
ACSM3	cluster_2	No	GO:0019438	BP	aromatic compound biosynthetic process	0.0179166	ACSL3,DTL,ICE1,PARP16,TCEA1	rna_Lymph_Node_c6,rna_Lymph_Node_c21
ACSM3	cluster_2	No	GO:0022402	BP	cell cycle process	0.0197686	ABCB1,ATF2,DTL,STAG3L3,TNKS	rna_Lymph_Node_c6,rna_Lymph_Node_c21
ACSM3	cluster_2	No	GO:0031365	BP	N-terminal protein amino acid modification	0.0105434	NAA15,NAA35	rna_Lymph_Node_c6,rna_Lymph_Node_c21
ACSM3	cluster_2	No	GO:0032446	BP	protein modification by small protein conjugation	0.0103401	DTL,RNF38,SMURF2,TNKS,WWP2	rna_Lymph_Node_c6,rna_Lymph_Node_c21
ACSM3	cluster_2	No	GO:0033554	BP	cellular response to stress	0.0384899	ATF2,DTL,PARP16,RPS6KA3,WDR48,XPR1	rna_Lymph_Node_c6,rna_Lymph_Node_c21
ACSM3	cluster_2	No	GO:0034654	BP	nucleobase-containing compound biosynthetic process	0.0091304	ACSL3,DTL,ICE1,PARP16,TCEA1	rna_Lymph_Node_c6,rna_Lymph_Node_c21
ACSM3	cluster_2	No	GO:0042176	BP	regulation of protein catabolic process	0.0319485	DTL,SMURF2,SORL1,WWP2	rna_Lymph_Node_c6,rna_Lymph_Node_c21
ACSM3	cluster_2	No	GO:0043543	BP	protein acylation	0.0208198	ATF2,NAA15,NAA35	rna_Lymph_Node_c6,rna_Lymph_Node_c21
ACSM3	cluster_2	No	GO:0045732	BP	positive regulation of protein catabolic process	0.0166724	DTL,SMURF2,SORL1,WWP2	rna_Lymph_Node_c6,rna_Lymph_Node_c21
ACSM3	cluster_2	No	GO:0051338	BP	regulation of transferase activity	0.0442015	CD24,EGR1,PARP16,PKIG,SORL1,TNKS	rna_Lymph_Node_c6,rna_Lymph_Node_c21
ACSM3	cluster_2	No	GO:0070213	BP	protein auto-ADP-ribosylation	0.0105434	PARP16,TNKS	rna_Lymph_Node_c6,rna_Lymph_Node_c21
ACSM3	cluster_2	No	GO:0070647	BP	protein modification by small protein conjugation or removal	0.00143131	DTL,RNF38,SMURF2,TNKS,WDR48,WWP2	rna_Lymph_Node_c6,rna_Lymph_Node_c21
ACSM3	cluster_2	No	GO:0071702	BP	organic substance transport	0.0442015	ABCB1,ACSL3,CD24,NUP160,NUP214,RAB31,SORL1	rna_Lymph_Node_c6,rna_Lymph_Node_c21
ACSM3	cluster_2	No	GO:0071705	BP	nitrogen compound transport	0.0395669	ABCB1,CD24,NUP160,NUP214,RAB31,SORL1	rna_Lymph_Node_c6,rna_Lymph_Node_c21
ACSM3	cluster_2	No	GO:1901362	BP	organic cyclic compound biosynthetic process	0.0355169	ACSL3,DTL,ICE1,PARP16,TCEA1	rna_Lymph_Node_c6,rna_Lymph_Node_c21
ACSM3	cluster_2	No	GO:1903047	BP	mitotic cell cycle process	0.0384899	ABCB1,ATF2,DTL,TNKS	rna_Lymph_Node_c6,rna_Lymph_Node_c21
ACSM3	cluster_2	Yes	GO:0006793	BP	phosphorus metabolic process	0.0439498	ACSL3,ATF2,PARP16,PKN2,PPP2R5E,RPS6KA3,TNKS	rna_Lymph_Node_c6,rna_Lymph_Node_c21
ACSM3	cluster_2	Yes	GO:0006796	BP	phosphate-containing compound metabolic process	0.0417545	ACSL3,ATF2,PARP16,PKN2,PPP2R5E,RPS6KA3,TNKS	rna_Lymph_Node_c6,rna_Lymph_Node_c21
ACSM3	cluster_6	No	GO:0000271	BP	polysaccharide biosynthetic process	0.0411965	CSGALNACT1,GBE1	rna_Heart_c22
ACSM3	cluster_6	No	GO:0001508	BP	action potential	0.0389768	CACNA1C,DMD,RYR2	rna_Heart_c22
ACSM3	cluster_6	No	GO:0001933	BP	negative regulation of protein phosphorylation	0.0439808	DMD,LATS1,PPARG,SLIT2	rna_Heart_c22
ACSM3	cluster_6	No	GO:0001960	BP	negative regulation of cytokine-mediated signaling pathway	0.0389768	NLRC5,PPARG,SLIT2	rna_Heart_c22
ACSM3	cluster_6	No	GO:0002027	BP	regulation of heart rate	0.0374845	CACNA1C,DMD,RYR2	rna_Heart_c22
ACSM3	cluster_6	No	GO:0002683	BP	negative regulation of immune system process	0.0251887	IL4I1,NLRC5,PPARG,SLIT2,WASL	rna_Heart_c22
ACSM3	cluster_6	No	GO:0002832	BP	negative regulation of response to biotic stimulus	0.0271195	IL4I1,NLRC5,PPARG	rna_Heart_c22
ACSM3	cluster_6	No	GO:0006942	BP	regulation of striated muscle contraction	0.0298869	CACNA1C,DMD,RYR2	rna_Heart_c22
ACSM3	cluster_6	No	GO:0008064	BP	regulation of actin polymerization or depolymerization	0.0298869	ARHGAP18,LATS1,SLIT2	rna_Heart_c22
ACSM3	cluster_6	No	GO:0008104	BP	protein localization	0.0150062	DMD,INVS,MAPRE2,PPARG,RAB22A,RAPGEF6,RYR2	rna_Heart_c22
ACSM3	cluster_6	No	GO:0009612	BP	response to mechanical stimulus	0.0374845	CDH2,DMD,RYR2	rna_Heart_c22
ACSM3	cluster_6	No	GO:0009653	BP	anatomical structure morphogenesis	0.0411965	CACNA1C,CDH2,LAMA2,RYR2,SLIT2,SVEP1,WASL	rna_Heart_c22
ACSM3	cluster_6	No	GO:0009968	BP	negative regulation of signal transduction	0.00172489	IGFBP6,INVS,ITGA1,LATS1,MFHAS1,NLRC5,PDE3A,PPARG,SLIT2	rna_Heart_c22
ACSM3	cluster_6	No	GO:0010243	BP	response to organonitrogen compound	0.0199515	PDE3A,PPARG,RPTOR,RYR2,SLIT2	rna_Heart_c22
ACSM3	cluster_6	No	GO:0010522	BP	regulation of calcium ion transport into cytosol	0.0237687	CACNA1C,DMD,RYR2	rna_Heart_c22
ACSM3	cluster_6	No	GO:0010563	BP	negative regulation of phosphorus metabolic process	0.0141239	DMD,LATS1,MFHAS1,PPARG,SLIT2	rna_Heart_c22
ACSM3	cluster_6	No	GO:0010644	BP	cell communication by electrical coupling	0.0411965	CACNA1C,RYR2	rna_Heart_c22
ACSM3	cluster_6	No	GO:0010648	BP	negative regulation of cell communication	0.00207173	IGFBP6,INVS,ITGA1,LATS1,MFHAS1,NLRC5,PDE3A,PPARG,SLIT2	rna_Heart_c22
ACSM3	cluster_6	No	GO:0010880	BP	regulation of release of sequestered calcium ion into cytosol by sarcoplasmic reticulum	0.00143046	CACNA1C,DMD,RYR2	rna_Heart_c22
ACSM3	cluster_6	No	GO:0010881	BP	regulation of cardiac muscle contraction by regulation of the release of sequestered calcium ion	0.00143046	CACNA1C,DMD,RYR2	rna_Heart_c22
ACSM3	cluster_6	No	GO:0010882	BP	regulation of cardiac muscle contraction by calcium ion signaling	0.00207173	CACNA1C,DMD,RYR2	rna_Heart_c22
ACSM3	cluster_6	No	GO:0014070	BP	response to organic cyclic compound	0.0389768	GRAMD1B,PDE3A,RYR2,SLIT2	rna_Heart_c22
ACSM3	cluster_6	No	GO:0019722	BP	calcium-mediated signaling	0.012776	CACNA1C,DMD,MCTP1,RYR2	rna_Heart_c22
ACSM3	cluster_6	No	GO:0019932	BP	second-messenger-mediated signaling	0.000437667	CACNA1C,DMD,MCTP1,PDE3A,PDE7B,RYR2	rna_Heart_c22
ACSM3	cluster_6	No	GO:0019933	BP	cAMP-mediated signaling	0.0411965	PDE3A,PDE7B	rna_Heart_c22
ACSM3	cluster_6	No	GO:0023057	BP	negative regulation of signaling	0.00207173	IGFBP6,INVS,ITGA1,LATS1,MFHAS1,NLRC5,PDE3A,PPARG,SLIT2	rna_Heart_c22
ACSM3	cluster_6	No	GO:0030178	BP	negative regulation of Wnt signaling pathway	0.0374845	IGFBP6,INVS,LATS1	rna_Heart_c22
ACSM3	cluster_6	No	GO:0030334	BP	regulation of cell migration	0.0298353	DACH1,MAPRE2,MCTP1,PPARG,SLIT2,ULK4,WASL	rna_Heart_c22
ACSM3	cluster_6	No	GO:0030336	BP	negative regulation of cell migration	0.0123222	DACH1,MCTP1,PPARG,SLIT2,WASL	rna_Heart_c22
ACSM3	cluster_6	No	GO:0030832	BP	regulation of actin filament length	0.0298869	ARHGAP18,LATS1,SLIT2	rna_Heart_c22
ACSM3	cluster_6	No	GO:0030833	BP	regulation of actin filament polymerization	0.0271195	ARHGAP18,LATS1,SLIT2	rna_Heart_c22
ACSM3	cluster_6	No	GO:0031400	BP	negative regulation of protein modification process	0.0161335	DMD,LATS1,MFHAS1,PPARG,SLIT2	rna_Heart_c22
ACSM3	cluster_6	No	GO:0032535	BP	regulation of cellular component size	0.00143046	ARHGAP18,LATS1,RAB22A,RPTOR,SLIT2	rna_Heart_c22
ACSM3	cluster_6	No	GO:0032970	BP	regulation of actin filament-based process	0.0101785	ARHGAP18,CACNA1C,LATS1,RYR2,SLIT2	rna_Heart_c22
ACSM3	cluster_6	No	GO:0033036	BP	macromolecule localization	0.0153697	DMD,INVS,MAPRE2,PPARG,RAB22A,RAPGEF6,RYR2	rna_Heart_c22
ACSM3	cluster_6	No	GO:0033135	BP	regulation of peptidyl-serine phosphorylation	0.0389768	DMD,LATS1,RPTOR	rna_Heart_c22
ACSM3	cluster_6	No	GO:0033692	BP	cellular polysaccharide biosynthetic process	0.0411965	CSGALNACT1,GBE1	rna_Heart_c22
ACSM3	cluster_6	No	GO:0034637	BP	cellular carbohydrate biosynthetic process	0.0411965	CSGALNACT1,GBE1	rna_Heart_c22
ACSM3	cluster_6	No	GO:0035556	BP	intracellular signal transduction	4.37669e-06	ARHGAP18,CACNA1C,DMD,LATS1,MCTP1,NLRC5,PDE3A,PDE7B,PRKACB,RAPGEF6,RPTOR,RYR2	rna_Heart_c22
ACSM3	cluster_6	No	GO:0035994	BP	response to muscle stretch	0.00467737	CDH2,DMD,RYR2	rna_Heart_c22
ACSM3	cluster_6	No	GO:0040012	BP	regulation of locomotion	0.0101785	ARHGAP18,DACH1,MAPRE2,MCTP1,PPARG,SLIT2,ULK4,WASL	rna_Heart_c22
ACSM3	cluster_6	No	GO:0040013	BP	negative regulation of locomotion	0.0199515	DACH1,MCTP1,PPARG,SLIT2,WASL	rna_Heart_c22
ACSM3	cluster_6	No	GO:0043085	BP	positive regulation of catalytic activity	0.0348669	CACNA1C,DOCK9,ITGA1,MAPRE2,PPARG,RAPGEF6,RPTOR	rna_Heart_c22
ACSM3	cluster_6	No	GO:0043087	BP	regulation of GTPase activity	0.0340019	ARHGAP15,DOCK9,MAPRE2,RAPGEF6	rna_Heart_c22
ACSM3	cluster_6	No	GO:0043116	BP	negative regulation of vascular permeability	0.0333204	PDE3A,SLIT2	rna_Heart_c22
ACSM3	cluster_6	No	GO:0045936	BP	negative regulation of phosphate metabolic process	0.0141239	DMD,LATS1,MFHAS1,PPARG,SLIT2	rna_Heart_c22
ACSM3	cluster_6	No	GO:0051056	BP	regulation of small GTPase mediated signal transduction	0.000243377	ARHGAP15,ARHGAP18,MAPRE2,MCF2L,PLEKHG1,SLIT2	rna_Heart_c22
ACSM3	cluster_6	No	GO:0051270	BP	regulation of cellular component movement	0.000505455	ARHGAP18,CACNA1C,DACH1,MAPRE2,MCTP1,PPARG,RYR2,SLIT2,ULK4,WASL	rna_Heart_c22
ACSM3	cluster_6	No	GO:0051271	BP	negative regulation of cellular component movement	0.0161335	DACH1,MCTP1,PPARG,SLIT2,WASL	rna_Heart_c22
ACSM3	cluster_6	No	GO:0051279	BP	regulation of release of sequestered calcium ion into cytosol	0.0101785	CACNA1C,DMD,RYR2	rna_Heart_c22
ACSM3	cluster_6	No	GO:0051282	BP	regulation of sequestering of calcium ion	0.0389768	CACNA1C,DMD,RYR2	rna_Heart_c22
ACSM3	cluster_6	No	GO:0051336	BP	regulation of hydrolase activity	0.0473354	ARHGAP15,DOCK9,ITGA1,MAPRE2,PPARG,RAPGEF6	rna_Heart_c22
ACSM3	cluster_6	No	GO:0051345	BP	positive regulation of hydrolase activity	0.0439808	DOCK9,ITGA1,MAPRE2,PPARG,RAPGEF6	rna_Heart_c22
ACSM3	cluster_6	No	GO:0051641	BP	cellular localization	0.00235475	BACH2,DMD,GRAMD1B,INVS,MAPRE2,RAB22A,RAPGEF6,RYR2,WASL	rna_Heart_c22
ACSM3	cluster_6	No	GO:0055117	BP	regulation of cardiac muscle contraction	0.0173997	CACNA1C,DMD,RYR2	rna_Heart_c22
ACSM3	cluster_6	No	GO:0060341	BP	regulation of cellular localization	0.0132821	CACNA1C,DMD,LATS1,MFHAS1,RYR2,STXBP4	rna_Heart_c22
ACSM3	cluster_6	No	GO:0060761	BP	negative regulation of response to cytokine stimulus	0.0389768	NLRC5,PPARG,SLIT2	rna_Heart_c22
ACSM3	cluster_6	No	GO:0071310	BP	cellular response to organic substance	0.0389768	CD14,GRAMD1B,PDE3A,PPARG,RPTOR,RYR2,SLIT2	rna_Heart_c22
ACSM3	cluster_6	No	GO:0071417	BP	cellular response to organonitrogen compound	0.00323426	PDE3A,PPARG,RPTOR,RYR2,SLIT2	rna_Heart_c22
ACSM3	cluster_6	No	GO:0071495	BP	cellular response to endogenous stimulus	0.0389768	PDE3A,PPARG,RPTOR,RYR2,SLIT2	rna_Heart_c22
ACSM3	cluster_6	No	GO:0080134	BP	regulation of response to stress	0.0410597	IGFBP6,IL1R1,MCTP1,MFHAS1,NLRC5,PPARG,ULK4	rna_Heart_c22
ACSM3	cluster_6	No	GO:0086001	BP	cardiac muscle cell action potential	0.0101785	CACNA1C,DMD,RYR2	rna_Heart_c22
ACSM3	cluster_6	No	GO:0086064	BP	cell communication by electrical coupling involved in cardiac conduction	0.0411965	CACNA1C,RYR2	rna_Heart_c22
ACSM3	cluster_6	No	GO:0090066	BP	regulation of anatomical structure size	0.00582449	ARHGAP18,LATS1,RAB22A,RPTOR,SLIT2	rna_Heart_c22
ACSM3	cluster_6	No	GO:0090090	BP	negative regulation of canonical Wnt signaling pathway	0.0298869	IGFBP6,INVS,LATS1	rna_Heart_c22
ACSM3	cluster_6	No	GO:0090257	BP	regulation of muscle system process	0.0102428	CACNA1C,DMD,PPARG,RYR2	rna_Heart_c22
ACSM3	cluster_6	No	GO:0098911	BP	regulation of ventricular cardiac muscle cell action potential	0.0411965	CACNA1C,RYR2	rna_Heart_c22
ACSM3	cluster_6	No	GO:1900181	BP	negative regulation of protein localization to nucleus	0.0411965	LATS1,MFHAS1	rna_Heart_c22
ACSM3	cluster_6	No	GO:1901698	BP	response to nitrogen compound	0.0289878	PDE3A,PPARG,RPTOR,RYR2,SLIT2	rna_Heart_c22
ACSM3	cluster_6	No	GO:1901699	BP	cellular response to nitrogen compound	0.00540584	PDE3A,PPARG,RPTOR,RYR2,SLIT2	rna_Heart_c22
ACSM3	cluster_6	No	GO:1901700	BP	response to oxygen-containing compound	0.0197951	CD14,GRAMD1B,PDE3A,PPARG,RPTOR,RYR2,SLIT2	rna_Heart_c22
ACSM3	cluster_6	No	GO:1901701	BP	cellular response to oxygen-containing compound	0.00321468	CD14,GRAMD1B,PDE3A,PPARG,RPTOR,RYR2,SLIT2	rna_Heart_c22
ACSM3	cluster_6	No	GO:1903169	BP	regulation of calcium ion transmembrane transport	0.0340019	CACNA1C,DMD,RYR2	rna_Heart_c22
ACSM3	cluster_6	No	GO:2000145	BP	regulation of cell motility	0.00841249	ARHGAP18,DACH1,MAPRE2,MCTP1,PPARG,SLIT2,ULK4,WASL	rna_Heart_c22
ACSM3	cluster_6	No	GO:2000146	BP	negative regulation of cell motility	0.0135856	DACH1,MCTP1,PPARG,SLIT2,WASL	rna_Heart_c22
ACTR5	cluster_16	No	GO:0009058	BP	biosynthetic process	0.0301551	ARV1,CTR9,FLVCR1,GK,NADSYN1,PAICS,UAP1,UBA52	atac_Kidney_c43,atac_Kidney_c44,atac_Kidney_c30,atac_Kidney_c49,atac_Kidney_c32,atac_Kidney_c26
ACTR5	cluster_16	No	GO:0018130	BP	heterocycle biosynthetic process	0.0364804	CTR9,FLVCR1,NADSYN1,PAICS,UAP1	atac_Kidney_c43,atac_Kidney_c44,atac_Kidney_c30,atac_Kidney_c49,atac_Kidney_c32,atac_Kidney_c26
ACTR5	cluster_16	No	GO:0019438	BP	aromatic compound biosynthetic process	0.0385054	CTR9,FLVCR1,NADSYN1,PAICS,UAP1	atac_Kidney_c43,atac_Kidney_c44,atac_Kidney_c30,atac_Kidney_c49,atac_Kidney_c32,atac_Kidney_c26
ACTR5	cluster_16	No	GO:0032386	BP	regulation of intracellular transport	0.0283086	ARV1,DNAJC13,PCNT,RAN,UBAC2	atac_Kidney_c43,atac_Kidney_c44,atac_Kidney_c30,atac_Kidney_c49,atac_Kidney_c32,atac_Kidney_c26
ACTR5	cluster_16	No	GO:0044271	BP	cellular nitrogen compound biosynthetic process	0.0301551	CTR9,FLVCR1,NADSYN1,PAICS,UAP1,UBA52	atac_Kidney_c43,atac_Kidney_c44,atac_Kidney_c30,atac_Kidney_c49,atac_Kidney_c32,atac_Kidney_c26
ACTR5	cluster_16	No	GO:0044281	BP	small molecule metabolic process	0.0357575	ARV1,GK,NADSYN1,PAICS,PIAS4,RAN,UAP1	atac_Kidney_c43,atac_Kidney_c44,atac_Kidney_c30,atac_Kidney_c49,atac_Kidney_c32,atac_Kidney_c26
ACTR5	cluster_16	No	GO:0050684	BP	regulation of mRNA processing	0.0446809	CTR9,FMR1,PRDX6	atac_Kidney_c43,atac_Kidney_c44,atac_Kidney_c30,atac_Kidney_c49,atac_Kidney_c32,atac_Kidney_c26
ACTR5	cluster_16	No	GO:0051223	BP	regulation of protein transport	0.0444019	ACHE,EXOC1,PCNT,RAN,UBAC2	atac_Kidney_c43,atac_Kidney_c44,atac_Kidney_c30,atac_Kidney_c49,atac_Kidney_c32,atac_Kidney_c26
ACTR5	cluster_16	No	GO:0055086	BP	nucleobase-containing small molecule metabolic process	0.0444019	NADSYN1,PAICS,RAN,UAP1	atac_Kidney_c43,atac_Kidney_c44,atac_Kidney_c30,atac_Kidney_c49,atac_Kidney_c32,atac_Kidney_c26
ACTR5	cluster_16	No	GO:0070201	BP	regulation of establishment of protein localization	0.0461821	ACHE,EXOC1,PCNT,RAN,UBAC2	atac_Kidney_c43,atac_Kidney_c44,atac_Kidney_c30,atac_Kidney_c49,atac_Kidney_c32,atac_Kidney_c26
ACTR5	cluster_16	No	GO:1901362	BP	organic cyclic compound biosynthetic process	0.0283086	ARV1,CTR9,FLVCR1,NADSYN1,PAICS,UAP1	atac_Kidney_c43,atac_Kidney_c44,atac_Kidney_c30,atac_Kidney_c49,atac_Kidney_c32,atac_Kidney_c26
ACTR5	cluster_16	No	GO:1901576	BP	organic substance biosynthetic process	0.0283086	ARV1,CTR9,FLVCR1,GK,NADSYN1,PAICS,UAP1,UBA52	atac_Kidney_c43,atac_Kidney_c44,atac_Kidney_c30,atac_Kidney_c49,atac_Kidney_c32,atac_Kidney_c26
ACTR5	cluster_16	No	GO:1903311	BP	regulation of mRNA metabolic process	0.0283086	CTR9,FMR1,PRDX6,TARDBP	atac_Kidney_c43,atac_Kidney_c44,atac_Kidney_c30,atac_Kidney_c49,atac_Kidney_c32,atac_Kidney_c26
ACTR5	cluster_16	No	GO:1903312	BP	negative regulation of mRNA metabolic process	0.0283086	CTR9,FMR1,TARDBP	atac_Kidney_c43,atac_Kidney_c44,atac_Kidney_c30,atac_Kidney_c49,atac_Kidney_c32,atac_Kidney_c26
ACTR5	cluster_16	Yes	GO:0006139	BP	nucleobase-containing compound metabolic process	0.0446809	CTR9,NADSYN1,PAICS,PIAS4,RAN,TARDBP,UAP1	atac_Kidney_c43,atac_Kidney_c44,atac_Kidney_c30,atac_Kidney_c49,atac_Kidney_c32,atac_Kidney_c26
ACTR5	cluster_6	No	GO:0006886	BP	intracellular protein transport	0.0230095	ARFIP1,ARL4A,FAM91A1,NUP214,ZFAND6	atac_Liver_c3,atac_Liver_c5,atac_Heart_c14,atac_Pancreas_c45,atac_Heart_c15
ACTR5	cluster_6	No	GO:0008104	BP	protein localization	0.00340973	ARFIP1,ARL4A,BLZF1,FAM91A1,HOOK1,NUP214,RRAGB,TNKS,ZFAND6	atac_Liver_c3,atac_Liver_c5,atac_Heart_c14,atac_Pancreas_c45,atac_Heart_c15
ACTR5	cluster_6	No	GO:0015031	BP	protein transport	0.0230095	ARFIP1,ARL4A,BLZF1,FAM91A1,NUP214,ZFAND6	atac_Liver_c3,atac_Liver_c5,atac_Heart_c14,atac_Pancreas_c45,atac_Heart_c15
ACTR5	cluster_6	No	GO:0033036	BP	macromolecule localization	0.00340973	ARFIP1,ARL4A,BLZF1,FAM91A1,HOOK1,NUP214,RRAGB,TNKS,ZFAND6	atac_Liver_c3,atac_Liver_c5,atac_Heart_c14,atac_Pancreas_c45,atac_Heart_c15
ACTR5	cluster_6	No	GO:0045184	BP	establishment of protein localization	0.0262562	ARFIP1,ARL4A,BLZF1,FAM91A1,NUP214,ZFAND6	atac_Liver_c3,atac_Liver_c5,atac_Heart_c14,atac_Pancreas_c45,atac_Heart_c15
ACTR5	cluster_6	No	GO:0046907	BP	intracellular transport	0.0140953	ARFIP1,ARL4A,FAM91A1,HOOK1,NUP214,TRAPPC11,ZFAND6	atac_Liver_c3,atac_Liver_c5,atac_Heart_c14,atac_Pancreas_c45,atac_Heart_c15
ACTR5	cluster_6	No	GO:0051641	BP	cellular localization	7.19384e-05	ARFIP1,ARL4A,BLZF1,EXOC1,FAM91A1,HOOK1,MSTO1,NUP214,RRAGB,TNKS,TRAPPC11,ZFAND6	atac_Liver_c3,atac_Liver_c5,atac_Heart_c14,atac_Pancreas_c45,atac_Heart_c15
ADAM19	cluster_0	No	GO:0001709	BP	cell fate determination	0.0259309	MEF2C,NOTCH2	rna_Spleen_c10,rna_Spleen_c22,rna_Spleen_c3,rna_Spleen_c7,rna_Spleen_c6,rna_Spleen_c12,rna_Spleen_c14,rna_Spleen_c18,rna_Spleen_c21,rna_Spleen_c23
ADAM19	cluster_0	No	GO:0001775	BP	cell activation	1.745e-05	BANK1,BCL2,DOCK8,FCRL1,HDAC9,IKZF1,MEF2C,NOTCH2,PTPRC	rna_Spleen_c10,rna_Spleen_c22,rna_Spleen_c3,rna_Spleen_c7,rna_Spleen_c6,rna_Spleen_c12,rna_Spleen_c14,rna_Spleen_c18,rna_Spleen_c21,rna_Spleen_c23
ADAM19	cluster_0	No	GO:0002253	BP	activation of immune response	6.4075e-05	BANK1,BCL2,IGHD,IGHM,INPP5D,MEF2C,PTPRC,SKAP1	rna_Spleen_c10,rna_Spleen_c22,rna_Spleen_c3,rna_Spleen_c7,rna_Spleen_c6,rna_Spleen_c12,rna_Spleen_c14,rna_Spleen_c18,rna_Spleen_c21,rna_Spleen_c23
ADAM19	cluster_0	No	GO:0002429	BP	immune response-activating cell surface receptor signaling pathway	1.5428e-05	BANK1,BCL2,IGHD,IGHM,INPP5D,MEF2C,PTPRC,SKAP1	rna_Spleen_c10,rna_Spleen_c22,rna_Spleen_c3,rna_Spleen_c7,rna_Spleen_c6,rna_Spleen_c12,rna_Spleen_c14,rna_Spleen_c18,rna_Spleen_c21,rna_Spleen_c23
ADAM19	cluster_0	No	GO:0002521	BP	leukocyte differentiation	0.0308309	HDAC9,IKZF1,NOTCH2,PTPRC	rna_Spleen_c10,rna_Spleen_c22,rna_Spleen_c3,rna_Spleen_c7,rna_Spleen_c6,rna_Spleen_c12,rna_Spleen_c14,rna_Spleen_c18,rna_Spleen_c21,rna_Spleen_c23
ADAM19	cluster_0	No	GO:0002684	BP	positive regulation of immune system process	0.00105158	BANK1,BCL2,DOCK8,IGHD,IGHM,INPP5D,MEF2C,PTPRC,SKAP1	rna_Spleen_c10,rna_Spleen_c22,rna_Spleen_c3,rna_Spleen_c7,rna_Spleen_c6,rna_Spleen_c12,rna_Spleen_c14,rna_Spleen_c18,rna_Spleen_c21,rna_Spleen_c23
ADAM19	cluster_0	No	GO:0002694	BP	regulation of leukocyte activation	0.000617434	BANK1,BCL2,DOCK8,IGHD,IGHM,IKZF3,MEF2C,PTPRC	rna_Spleen_c10,rna_Spleen_c22,rna_Spleen_c3,rna_Spleen_c7,rna_Spleen_c6,rna_Spleen_c12,rna_Spleen_c14,rna_Spleen_c18,rna_Spleen_c21,rna_Spleen_c23
ADAM19	cluster_0	No	GO:0002696	BP	positive regulation of leukocyte activation	0.0065748	BCL2,DOCK8,IGHD,IGHM,MEF2C,PTPRC	rna_Spleen_c10,rna_Spleen_c22,rna_Spleen_c3,rna_Spleen_c7,rna_Spleen_c6,rna_Spleen_c12,rna_Spleen_c14,rna_Spleen_c18,rna_Spleen_c21,rna_Spleen_c23
ADAM19	cluster_0	No	GO:0002757	BP	immune response-activating signal transduction	1.5428e-05	BANK1,BCL2,IGHD,IGHM,INPP5D,MEF2C,PTPRC,SKAP1	rna_Spleen_c10,rna_Spleen_c22,rna_Spleen_c3,rna_Spleen_c7,rna_Spleen_c6,rna_Spleen_c12,rna_Spleen_c14,rna_Spleen_c18,rna_Spleen_c21,rna_Spleen_c23
ADAM19	cluster_0	No	GO:0002764	BP	immune response-regulating signaling pathway	4.38796e-05	BANK1,BCL2,IGHD,IGHM,INPP5D,MEF2C,PTPRC,SKAP1	rna_Spleen_c10,rna_Spleen_c22,rna_Spleen_c3,rna_Spleen_c7,rna_Spleen_c6,rna_Spleen_c12,rna_Spleen_c14,rna_Spleen_c18,rna_Spleen_c21,rna_Spleen_c23
ADAM19	cluster_0	No	GO:0002768	BP	immune response-regulating cell surface receptor signaling pathway	2.22085e-05	BANK1,BCL2,IGHD,IGHM,INPP5D,MEF2C,PTPRC,SKAP1	rna_Spleen_c10,rna_Spleen_c22,rna_Spleen_c3,rna_Spleen_c7,rna_Spleen_c6,rna_Spleen_c12,rna_Spleen_c14,rna_Spleen_c18,rna_Spleen_c21,rna_Spleen_c23
ADAM19	cluster_0	No	GO:0006396	BP	RNA processing	0.0213513	CDKAL1,CELF2,HNRNPA2B1,SCAF11	rna_Spleen_c10,rna_Spleen_c22,rna_Spleen_c3,rna_Spleen_c7,rna_Spleen_c6,rna_Spleen_c12,rna_Spleen_c14,rna_Spleen_c18,rna_Spleen_c21,rna_Spleen_c23
ADAM19	cluster_0	No	GO:0008283	BP	cell population proliferation	0.0288268	BCL2,DOCK8,MEF2C,PTPRC	rna_Spleen_c10,rna_Spleen_c22,rna_Spleen_c3,rna_Spleen_c7,rna_Spleen_c6,rna_Spleen_c12,rna_Spleen_c14,rna_Spleen_c18,rna_Spleen_c21,rna_Spleen_c23
ADAM19	cluster_0	No	GO:0009888	BP	tissue development	0.00191555	BASP1,IKZF1,IKZF3,MEF2C,NOTCH2,PTPRC	rna_Spleen_c10,rna_Spleen_c22,rna_Spleen_c3,rna_Spleen_c7,rna_Spleen_c6,rna_Spleen_c12,rna_Spleen_c14,rna_Spleen_c18,rna_Spleen_c21,rna_Spleen_c23
ADAM19	cluster_0	No	GO:0010563	BP	negative regulation of phosphorus metabolic process	0.00820829	MGAT5,PARP14,PIP4K2A,PPP1R16B,PTPRC	rna_Spleen_c10,rna_Spleen_c22,rna_Spleen_c3,rna_Spleen_c7,rna_Spleen_c6,rna_Spleen_c12,rna_Spleen_c14,rna_Spleen_c18,rna_Spleen_c21,rna_Spleen_c23
ADAM19	cluster_0	No	GO:0010629	BP	negative regulation of gene expression	0.0127732	HDAC9,MEF2C,NOTCH2,PARP14,PTPRC,TNRC6B	rna_Spleen_c10,rna_Spleen_c22,rna_Spleen_c3,rna_Spleen_c7,rna_Spleen_c6,rna_Spleen_c12,rna_Spleen_c14,rna_Spleen_c18,rna_Spleen_c21,rna_Spleen_c23
ADAM19	cluster_0	No	GO:0010921	BP	regulation of phosphatase activity	0.0093601	MEF2C,MGAT5,PTPRC	rna_Spleen_c10,rna_Spleen_c22,rna_Spleen_c3,rna_Spleen_c7,rna_Spleen_c6,rna_Spleen_c12,rna_Spleen_c14,rna_Spleen_c18,rna_Spleen_c21,rna_Spleen_c23
ADAM19	cluster_0	No	GO:0030098	BP	lymphocyte differentiation	0.0127732	HDAC9,IKZF1,NOTCH2,PTPRC	rna_Spleen_c10,rna_Spleen_c22,rna_Spleen_c3,rna_Spleen_c7,rna_Spleen_c6,rna_Spleen_c12,rna_Spleen_c14,rna_Spleen_c18,rna_Spleen_c21,rna_Spleen_c23
ADAM19	cluster_0	No	GO:0030183	BP	B cell differentiation	0.0259309	HDAC9,NOTCH2,PTPRC	rna_Spleen_c10,rna_Spleen_c22,rna_Spleen_c3,rna_Spleen_c7,rna_Spleen_c6,rna_Spleen_c12,rna_Spleen_c14,rna_Spleen_c18,rna_Spleen_c21,rna_Spleen_c23
ADAM19	cluster_0	No	GO:0030888	BP	regulation of B cell proliferation	0.00151866	BCL2,IKZF3,MEF2C,PTPRC	rna_Spleen_c10,rna_Spleen_c22,rna_Spleen_c3,rna_Spleen_c7,rna_Spleen_c6,rna_Spleen_c12,rna_Spleen_c14,rna_Spleen_c18,rna_Spleen_c21,rna_Spleen_c23
ADAM19	cluster_0	No	GO:0030890	BP	positive regulation of B cell proliferation	0.00820829	BCL2,MEF2C,PTPRC	rna_Spleen_c10,rna_Spleen_c22,rna_Spleen_c3,rna_Spleen_c7,rna_Spleen_c6,rna_Spleen_c12,rna_Spleen_c14,rna_Spleen_c18,rna_Spleen_c21,rna_Spleen_c23
ADAM19	cluster_0	No	GO:0032943	BP	mononuclear cell proliferation	0.000244794	BCL2,DOCK8,MEF2C,PTPRC	rna_Spleen_c10,rna_Spleen_c22,rna_Spleen_c3,rna_Spleen_c7,rna_Spleen_c6,rna_Spleen_c12,rna_Spleen_c14,rna_Spleen_c18,rna_Spleen_c21,rna_Spleen_c23
ADAM19	cluster_0	No	GO:0032944	BP	regulation of mononuclear cell proliferation	0.0373731	BCL2,IKZF3,MEF2C,PTPRC	rna_Spleen_c10,rna_Spleen_c22,rna_Spleen_c3,rna_Spleen_c7,rna_Spleen_c6,rna_Spleen_c12,rna_Spleen_c14,rna_Spleen_c18,rna_Spleen_c21,rna_Spleen_c23
ADAM19	cluster_0	No	GO:0035303	BP	regulation of dephosphorylation	0.00105158	MEF2C,MGAT5,PPP1R16B,PTPRC	rna_Spleen_c10,rna_Spleen_c22,rna_Spleen_c3,rna_Spleen_c7,rna_Spleen_c6,rna_Spleen_c12,rna_Spleen_c14,rna_Spleen_c18,rna_Spleen_c21,rna_Spleen_c23
ADAM19	cluster_0	No	GO:0035304	BP	regulation of protein dephosphorylation	0.0093601	MGAT5,PPP1R16B,PTPRC	rna_Spleen_c10,rna_Spleen_c22,rna_Spleen_c3,rna_Spleen_c7,rna_Spleen_c6,rna_Spleen_c12,rna_Spleen_c14,rna_Spleen_c18,rna_Spleen_c21,rna_Spleen_c23
ADAM19	cluster_0	No	GO:0035306	BP	positive regulation of dephosphorylation	0.00820829	MEF2C,PPP1R16B,PTPRC	rna_Spleen_c10,rna_Spleen_c22,rna_Spleen_c3,rna_Spleen_c7,rna_Spleen_c6,rna_Spleen_c12,rna_Spleen_c14,rna_Spleen_c18,rna_Spleen_c21,rna_Spleen_c23
ADAM19	cluster_0	No	GO:0035308	BP	negative regulation of protein dephosphorylation	0.039296	MGAT5,PPP1R16B	rna_Spleen_c10,rna_Spleen_c22,rna_Spleen_c3,rna_Spleen_c7,rna_Spleen_c6,rna_Spleen_c12,rna_Spleen_c14,rna_Spleen_c18,rna_Spleen_c21,rna_Spleen_c23
ADAM19	cluster_0	No	GO:0042100	BP	B cell proliferation	0.00178413	BCL2,MEF2C,PTPRC	rna_Spleen_c10,rna_Spleen_c22,rna_Spleen_c3,rna_Spleen_c7,rna_Spleen_c6,rna_Spleen_c12,rna_Spleen_c14,rna_Spleen_c18,rna_Spleen_c21,rna_Spleen_c23
ADAM19	cluster_0	No	GO:0042113	BP	B cell activation	5.59059e-07	BANK1,BCL2,FCRL1,HDAC9,MEF2C,NOTCH2,PTPRC	rna_Spleen_c10,rna_Spleen_c22,rna_Spleen_c3,rna_Spleen_c7,rna_Spleen_c6,rna_Spleen_c12,rna_Spleen_c14,rna_Spleen_c18,rna_Spleen_c21,rna_Spleen_c23
ADAM19	cluster_0	No	GO:0045321	BP	leukocyte activation	6.33774e-06	BANK1,BCL2,DOCK8,FCRL1,HDAC9,IKZF1,MEF2C,NOTCH2,PTPRC	rna_Spleen_c10,rna_Spleen_c22,rna_Spleen_c3,rna_Spleen_c7,rna_Spleen_c6,rna_Spleen_c12,rna_Spleen_c14,rna_Spleen_c18,rna_Spleen_c21,rna_Spleen_c23
ADAM19	cluster_0	No	GO:0045936	BP	negative regulation of phosphate metabolic process	0.00820829	MGAT5,PARP14,PIP4K2A,PPP1R16B,PTPRC	rna_Spleen_c10,rna_Spleen_c22,rna_Spleen_c3,rna_Spleen_c7,rna_Spleen_c6,rna_Spleen_c12,rna_Spleen_c14,rna_Spleen_c18,rna_Spleen_c21,rna_Spleen_c23
ADAM19	cluster_0	No	GO:0046649	BP	lymphocyte activation	5.5176e-07	BANK1,BCL2,DOCK8,FCRL1,HDAC9,IKZF1,MEF2C,NOTCH2,PTPRC	rna_Spleen_c10,rna_Spleen_c22,rna_Spleen_c3,rna_Spleen_c7,rna_Spleen_c6,rna_Spleen_c12,rna_Spleen_c14,rna_Spleen_c18,rna_Spleen_c21,rna_Spleen_c23
ADAM19	cluster_0	No	GO:0046651	BP	lymphocyte proliferation	0.000244794	BCL2,DOCK8,MEF2C,PTPRC	rna_Spleen_c10,rna_Spleen_c22,rna_Spleen_c3,rna_Spleen_c7,rna_Spleen_c6,rna_Spleen_c12,rna_Spleen_c14,rna_Spleen_c18,rna_Spleen_c21,rna_Spleen_c23
ADAM19	cluster_0	No	GO:0050670	BP	regulation of lymphocyte proliferation	0.0373731	BCL2,IKZF3,MEF2C,PTPRC	rna_Spleen_c10,rna_Spleen_c22,rna_Spleen_c3,rna_Spleen_c7,rna_Spleen_c6,rna_Spleen_c12,rna_Spleen_c14,rna_Spleen_c18,rna_Spleen_c21,rna_Spleen_c23
ADAM19	cluster_0	No	GO:0050776	BP	regulation of immune response	0.000617434	BANK1,BCL2,IGHD,IGHM,INPP5D,MEF2C,PARP14,PTPRC,SKAP1	rna_Spleen_c10,rna_Spleen_c22,rna_Spleen_c3,rna_Spleen_c7,rna_Spleen_c6,rna_Spleen_c12,rna_Spleen_c14,rna_Spleen_c18,rna_Spleen_c21,rna_Spleen_c23
ADAM19	cluster_0	No	GO:0050778	BP	positive regulation of immune response	0.000601998	BANK1,BCL2,IGHD,IGHM,INPP5D,MEF2C,PTPRC,SKAP1	rna_Spleen_c10,rna_Spleen_c22,rna_Spleen_c3,rna_Spleen_c7,rna_Spleen_c6,rna_Spleen_c12,rna_Spleen_c14,rna_Spleen_c18,rna_Spleen_c21,rna_Spleen_c23
ADAM19	cluster_0	No	GO:0050851	BP	antigen receptor-mediated signaling pathway	6.33774e-06	BANK1,BCL2,IGHD,IGHM,INPP5D,MEF2C,PTPRC,SKAP1	rna_Spleen_c10,rna_Spleen_c22,rna_Spleen_c3,rna_Spleen_c7,rna_Spleen_c6,rna_Spleen_c12,rna_Spleen_c14,rna_Spleen_c18,rna_Spleen_c21,rna_Spleen_c23
ADAM19	cluster_0	No	GO:0050852	BP	T cell receptor signaling pathway	0.0405585	INPP5D,PTPRC,SKAP1	rna_Spleen_c10,rna_Spleen_c22,rna_Spleen_c3,rna_Spleen_c7,rna_Spleen_c6,rna_Spleen_c12,rna_Spleen_c14,rna_Spleen_c18,rna_Spleen_c21,rna_Spleen_c23
ADAM19	cluster_0	No	GO:0050853	BP	B cell receptor signaling pathway	0.000126441	BANK1,BCL2,IGHD,IGHM,MEF2C,PTPRC	rna_Spleen_c10,rna_Spleen_c22,rna_Spleen_c3,rna_Spleen_c7,rna_Spleen_c6,rna_Spleen_c12,rna_Spleen_c14,rna_Spleen_c18,rna_Spleen_c21,rna_Spleen_c23
ADAM19	cluster_0	No	GO:0050864	BP	regulation of B cell activation	3.66826e-05	BANK1,BCL2,IGHD,IGHM,IKZF3,MEF2C,PTPRC	rna_Spleen_c10,rna_Spleen_c22,rna_Spleen_c3,rna_Spleen_c7,rna_Spleen_c6,rna_Spleen_c12,rna_Spleen_c14,rna_Spleen_c18,rna_Spleen_c21,rna_Spleen_c23
ADAM19	cluster_0	No	GO:0050865	BP	regulation of cell activation	0.00105158	BANK1,BCL2,DOCK8,IGHD,IGHM,IKZF3,MEF2C,PTPRC	rna_Spleen_c10,rna_Spleen_c22,rna_Spleen_c3,rna_Spleen_c7,rna_Spleen_c6,rna_Spleen_c12,rna_Spleen_c14,rna_Spleen_c18,rna_Spleen_c21,rna_Spleen_c23
ADAM19	cluster_0	No	GO:0050867	BP	positive regulation of cell activation	0.00808099	BCL2,DOCK8,IGHD,IGHM,MEF2C,PTPRC	rna_Spleen_c10,rna_Spleen_c22,rna_Spleen_c3,rna_Spleen_c7,rna_Spleen_c6,rna_Spleen_c12,rna_Spleen_c14,rna_Spleen_c18,rna_Spleen_c21,rna_Spleen_c23
ADAM19	cluster_0	No	GO:0050871	BP	positive regulation of B cell activation	0.00207481	BCL2,IGHD,IGHM,MEF2C,PTPRC	rna_Spleen_c10,rna_Spleen_c22,rna_Spleen_c3,rna_Spleen_c7,rna_Spleen_c6,rna_Spleen_c12,rna_Spleen_c14,rna_Spleen_c18,rna_Spleen_c21,rna_Spleen_c23
ADAM19	cluster_0	No	GO:0051056	BP	regulation of small GTPase mediated signal transduction	0.0165879	ARHGAP15,DOCK8,NOTCH2,P2RY8	rna_Spleen_c10,rna_Spleen_c22,rna_Spleen_c3,rna_Spleen_c7,rna_Spleen_c6,rna_Spleen_c12,rna_Spleen_c14,rna_Spleen_c18,rna_Spleen_c21,rna_Spleen_c23
ADAM19	cluster_0	No	GO:0051249	BP	regulation of lymphocyte activation	0.000269203	BANK1,BCL2,DOCK8,IGHD,IGHM,IKZF3,MEF2C,PTPRC	rna_Spleen_c10,rna_Spleen_c22,rna_Spleen_c3,rna_Spleen_c7,rna_Spleen_c6,rna_Spleen_c12,rna_Spleen_c14,rna_Spleen_c18,rna_Spleen_c21,rna_Spleen_c23
ADAM19	cluster_0	No	GO:0051251	BP	positive regulation of lymphocyte activation	0.00453857	BCL2,DOCK8,IGHD,IGHM,MEF2C,PTPRC	rna_Spleen_c10,rna_Spleen_c22,rna_Spleen_c3,rna_Spleen_c7,rna_Spleen_c6,rna_Spleen_c12,rna_Spleen_c14,rna_Spleen_c18,rna_Spleen_c21,rna_Spleen_c23
ADAM19	cluster_0	No	GO:0051336	BP	regulation of hydrolase activity	0.0065748	ARHGAP15,DOCK8,HDAC9,MEF2C,MGAT5,PTPRC,TBC1D22A	rna_Spleen_c10,rna_Spleen_c22,rna_Spleen_c3,rna_Spleen_c7,rna_Spleen_c6,rna_Spleen_c12,rna_Spleen_c14,rna_Spleen_c18,rna_Spleen_c21,rna_Spleen_c23
ADAM19	cluster_0	No	GO:0061014	BP	positive regulation of mRNA catabolic process	0.0259309	TNRC6B,ZC3HAV1	rna_Spleen_c10,rna_Spleen_c22,rna_Spleen_c3,rna_Spleen_c7,rna_Spleen_c6,rna_Spleen_c12,rna_Spleen_c14,rna_Spleen_c18,rna_Spleen_c21,rna_Spleen_c23
ADAM19	cluster_0	No	GO:0061024	BP	membrane organization	0.0065748	BCL2,ELMO1,IGHD,IGHM,PIP4K2A,PTPRC	rna_Spleen_c10,rna_Spleen_c22,rna_Spleen_c3,rna_Spleen_c7,rna_Spleen_c6,rna_Spleen_c12,rna_Spleen_c14,rna_Spleen_c18,rna_Spleen_c21,rna_Spleen_c23
ADAM19	cluster_0	No	GO:0070661	BP	leukocyte proliferation	0.000444256	BCL2,DOCK8,MEF2C,PTPRC	rna_Spleen_c10,rna_Spleen_c22,rna_Spleen_c3,rna_Spleen_c7,rna_Spleen_c6,rna_Spleen_c12,rna_Spleen_c14,rna_Spleen_c18,rna_Spleen_c21,rna_Spleen_c23
ADAM19	cluster_0	No	GO:0070663	BP	regulation of leukocyte proliferation	0.0441964	BCL2,IKZF3,MEF2C,PTPRC	rna_Spleen_c10,rna_Spleen_c22,rna_Spleen_c3,rna_Spleen_c7,rna_Spleen_c6,rna_Spleen_c12,rna_Spleen_c14,rna_Spleen_c18,rna_Spleen_c21,rna_Spleen_c23
ADAM19	cluster_0	No	GO:1903131	BP	mononuclear cell differentiation	0.0230252	HDAC9,IKZF1,NOTCH2,PTPRC	rna_Spleen_c10,rna_Spleen_c22,rna_Spleen_c3,rna_Spleen_c7,rna_Spleen_c6,rna_Spleen_c12,rna_Spleen_c14,rna_Spleen_c18,rna_Spleen_c21,rna_Spleen_c23
ADAM19	cluster_0	No	GO:1903613	BP	regulation of protein tyrosine phosphatase activity	0.0065748	MGAT5,PTPRC	rna_Spleen_c10,rna_Spleen_c22,rna_Spleen_c3,rna_Spleen_c7,rna_Spleen_c6,rna_Spleen_c12,rna_Spleen_c14,rna_Spleen_c18,rna_Spleen_c21,rna_Spleen_c23
ADAM19	cluster_0	No	GO:1904892	BP	regulation of receptor signaling pathway via STAT	0.0373731	MGAT5,PARP14,PTPRC	rna_Spleen_c10,rna_Spleen_c22,rna_Spleen_c3,rna_Spleen_c7,rna_Spleen_c6,rna_Spleen_c12,rna_Spleen_c14,rna_Spleen_c18,rna_Spleen_c21,rna_Spleen_c23
ADAM19	cluster_5	No	GO:0001558	BP	regulation of cell growth	0.0457094	FGF13,RPTOR,SEMA3D,SYT1	rna_Lung_c24,rna_Large_Intestine_c21
ADAM19	cluster_5	No	GO:0007154	BP	cell communication	0.000706328	ATF2,CACNA1C,CHRM3,FGF13,PDE7B,PRKAA2,RPTOR,SYT1,VPS41	rna_Lung_c24,rna_Large_Intestine_c21
ADAM19	cluster_5	No	GO:0008104	BP	protein localization	0.000537773	ARFIP1,ATP1B3,FGF13,NUP214,OBSCN,PHLDB2,RAPGEF6,TSPAN5,VPS41	rna_Lung_c24,rna_Large_Intestine_c21
ADAM19	cluster_5	No	GO:0008593	BP	regulation of Notch signaling pathway	0.0275478	ROBO2,TSPAN5,WWP2	rna_Lung_c24,rna_Large_Intestine_c21
ADAM19	cluster_5	No	GO:0009267	BP	cellular response to starvation	0.00179709	ATF2,PRKAA2,RPTOR,VPS41	rna_Lung_c24,rna_Large_Intestine_c21
ADAM19	cluster_5	No	GO:0009991	BP	response to extracellular stimulus	0.00133545	ATF2,PRKAA2,RPTOR,SGIP1,VPS41	rna_Lung_c24,rna_Large_Intestine_c21
ADAM19	cluster_5	No	GO:0031667	BP	response to nutrient levels	0.00119301	ATF2,PRKAA2,RPTOR,SGIP1,VPS41	rna_Lung_c24,rna_Large_Intestine_c21
ADAM19	cluster_5	No	GO:0031668	BP	cellular response to extracellular stimulus	0.00495154	ATF2,PRKAA2,RPTOR,VPS41	rna_Lung_c24,rna_Large_Intestine_c21
ADAM19	cluster_5	No	GO:0031669	BP	cellular response to nutrient levels	0.00436935	ATF2,PRKAA2,RPTOR,VPS41	rna_Lung_c24,rna_Large_Intestine_c21
ADAM19	cluster_5	No	GO:0033036	BP	macromolecule localization	0.000538379	ARFIP1,ATP1B3,FGF13,NUP214,OBSCN,PHLDB2,RAPGEF6,TSPAN5,VPS41	rna_Lung_c24,rna_Large_Intestine_c21
ADAM19	cluster_5	No	GO:0034613	BP	cellular protein localization	0.00259976	ATP1B3,FGF13,NUP214,OBSCN,RAPGEF6,TSPAN5,VPS41	rna_Lung_c24,rna_Large_Intestine_c21
ADAM19	cluster_5	No	GO:0034765	BP	regulation of ion transmembrane transport	0.024223	ATP1B3,CACNA1C,CHRM3,FGF13,WWP2	rna_Lung_c24,rna_Large_Intestine_c21
ADAM19	cluster_5	No	GO:0035556	BP	intracellular signal transduction	0.000335252	ATF2,CACNA1C,CHRM3,FGF13,PDE7B,PKN2,PLCL1,PRKAA2,RAPGEF6,RPTOR	rna_Lung_c24,rna_Large_Intestine_c21
ADAM19	cluster_5	No	GO:0042594	BP	response to starvation	0.00217032	ATF2,PRKAA2,RPTOR,VPS41	rna_Lung_c24,rna_Large_Intestine_c21
ADAM19	cluster_5	No	GO:0043269	BP	regulation of ion transport	0.0150587	ATP1B3,CACNA1C,CHRM3,FGF13,SYT1,WWP2	rna_Lung_c24,rna_Large_Intestine_c21
ADAM19	cluster_5	No	GO:0051641	BP	cellular localization	0.0142495	ARFIP1,ATP1B3,FGF13,NUP214,OBSCN,RAPGEF6,TSPAN5,VPS41	rna_Lung_c24,rna_Large_Intestine_c21
ADAM19	cluster_5	No	GO:0051961	BP	negative regulation of nervous system development	0.0457094	FGF13,ROBO2,SEMA3D	rna_Lung_c24,rna_Large_Intestine_c21
ADAM19	cluster_5	No	GO:0070507	BP	regulation of microtubule cytoskeleton organization	0.0457094	FGF13,PHLDB2,PRKAA2	rna_Lung_c24,rna_Large_Intestine_c21
ADAM19	cluster_5	No	GO:0070647	BP	protein modification by small protein conjugation or removal	0.0155656	NFX1,PJA2,RNF38,SENP5,WWP2	rna_Lung_c24,rna_Large_Intestine_c21
ADAM19	cluster_5	No	GO:0070727	BP	cellular macromolecule localization	0.00259976	ATP1B3,FGF13,NUP214,OBSCN,RAPGEF6,TSPAN5,VPS41	rna_Lung_c24,rna_Large_Intestine_c21
ADAM19	cluster_5	No	GO:0071496	BP	cellular response to external stimulus	0.0128691	ATF2,PRKAA2,RPTOR,VPS41	rna_Lung_c24,rna_Large_Intestine_c21
ADAM19	cluster_5	No	GO:0072659	BP	protein localization to plasma membrane	0.00495154	ATP1B3,FGF13,RAPGEF6,TSPAN5	rna_Lung_c24,rna_Large_Intestine_c21
ADAM19	cluster_5	No	GO:1901570	BP	fatty acid derivative biosynthetic process	0.0275478	ACSL3,GGT5	rna_Lung_c24,rna_Large_Intestine_c21
ADAM19	cluster_5	No	GO:1990778	BP	protein localization to cell periphery	0.00907234	ATP1B3,FGF13,RAPGEF6,TSPAN5	rna_Lung_c24,rna_Large_Intestine_c21
ADAM28	cluster_1	No	GO:0000209	BP	protein polyubiquitination	0.03171	BCL2,SMURF2,TNKS	rna_Spleen_c10,rna_Spleen_c3,rna_Spleen_c7,rna_Spleen_c6,rna_Spleen_c12,rna_Spleen_c14,rna_Spleen_c18,rna_Spleen_c21,rna_Spleen_c23
ADAM28	cluster_1	No	GO:0001775	BP	cell activation	0.00286714	BCL2,CD74,DOCK8,HDAC9,IKZF1,IL21R,NOTCH2	rna_Spleen_c10,rna_Spleen_c3,rna_Spleen_c7,rna_Spleen_c6,rna_Spleen_c12,rna_Spleen_c14,rna_Spleen_c18,rna_Spleen_c21,rna_Spleen_c23
ADAM28	cluster_1	No	GO:0002250	BP	adaptive immune response	0.0397728	CD74,IGHM,IL21R	rna_Spleen_c10,rna_Spleen_c3,rna_Spleen_c7,rna_Spleen_c6,rna_Spleen_c12,rna_Spleen_c14,rna_Spleen_c18,rna_Spleen_c21,rna_Spleen_c23
ADAM28	cluster_1	No	GO:0002252	BP	immune effector process	0.0101569	CD74,CR1,IGHD,IGHM,IL21R,NOTCH2	rna_Spleen_c10,rna_Spleen_c3,rna_Spleen_c7,rna_Spleen_c6,rna_Spleen_c12,rna_Spleen_c14,rna_Spleen_c18,rna_Spleen_c21,rna_Spleen_c23
ADAM28	cluster_1	No	GO:0002253	BP	activation of immune response	0.0398929	BCL2,CR1,IGHD,IGHM,SKAP1	rna_Spleen_c10,rna_Spleen_c3,rna_Spleen_c7,rna_Spleen_c6,rna_Spleen_c12,rna_Spleen_c14,rna_Spleen_c18,rna_Spleen_c21,rna_Spleen_c23
ADAM28	cluster_1	No	GO:0002429	BP	immune response-activating cell surface receptor signaling pathway	0.0180022	BCL2,CR1,IGHD,IGHM,SKAP1	rna_Spleen_c10,rna_Spleen_c3,rna_Spleen_c7,rna_Spleen_c6,rna_Spleen_c12,rna_Spleen_c14,rna_Spleen_c18,rna_Spleen_c21,rna_Spleen_c23
ADAM28	cluster_1	No	GO:0002684	BP	positive regulation of immune system process	0.0365931	BCL2,CD74,CR1,DOCK8,IGHD,IGHM,SKAP1	rna_Spleen_c10,rna_Spleen_c3,rna_Spleen_c7,rna_Spleen_c6,rna_Spleen_c12,rna_Spleen_c14,rna_Spleen_c18,rna_Spleen_c21,rna_Spleen_c23
ADAM28	cluster_1	No	GO:0002694	BP	regulation of leukocyte activation	0.00780896	BCL2,CD74,CR1,DOCK8,IGHD,IGHM,PJA2	rna_Spleen_c10,rna_Spleen_c3,rna_Spleen_c7,rna_Spleen_c6,rna_Spleen_c12,rna_Spleen_c14,rna_Spleen_c18,rna_Spleen_c21,rna_Spleen_c23
ADAM28	cluster_1	No	GO:0002696	BP	positive regulation of leukocyte activation	0.00949855	BCL2,CD74,CR1,DOCK8,IGHD,IGHM	rna_Spleen_c10,rna_Spleen_c3,rna_Spleen_c7,rna_Spleen_c6,rna_Spleen_c12,rna_Spleen_c14,rna_Spleen_c18,rna_Spleen_c21,rna_Spleen_c23
ADAM28	cluster_1	No	GO:0002757	BP	immune response-activating signal transduction	0.0180022	BCL2,CR1,IGHD,IGHM,SKAP1	rna_Spleen_c10,rna_Spleen_c3,rna_Spleen_c7,rna_Spleen_c6,rna_Spleen_c12,rna_Spleen_c14,rna_Spleen_c18,rna_Spleen_c21,rna_Spleen_c23
ADAM28	cluster_1	No	GO:0002764	BP	immune response-regulating signaling pathway	0.0324595	BCL2,CR1,IGHD,IGHM,SKAP1	rna_Spleen_c10,rna_Spleen_c3,rna_Spleen_c7,rna_Spleen_c6,rna_Spleen_c12,rna_Spleen_c14,rna_Spleen_c18,rna_Spleen_c21,rna_Spleen_c23
ADAM28	cluster_1	No	GO:0002768	BP	immune response-regulating cell surface receptor signaling pathway	0.0240367	BCL2,CR1,IGHD,IGHM,SKAP1	rna_Spleen_c10,rna_Spleen_c3,rna_Spleen_c7,rna_Spleen_c6,rna_Spleen_c12,rna_Spleen_c14,rna_Spleen_c18,rna_Spleen_c21,rna_Spleen_c23
ADAM28	cluster_1	No	GO:0006471	BP	protein ADP-ribosylation	0.0248331	PARP14,TNKS	rna_Spleen_c10,rna_Spleen_c3,rna_Spleen_c7,rna_Spleen_c6,rna_Spleen_c12,rna_Spleen_c14,rna_Spleen_c18,rna_Spleen_c21,rna_Spleen_c23
ADAM28	cluster_1	No	GO:0008630	BP	intrinsic apoptotic signaling pathway in response to DNA damage	0.0248331	BCL2,CRIP1	rna_Spleen_c10,rna_Spleen_c3,rna_Spleen_c7,rna_Spleen_c6,rna_Spleen_c12,rna_Spleen_c14,rna_Spleen_c18,rna_Spleen_c21,rna_Spleen_c23
ADAM28	cluster_1	No	GO:0016482	BP	cytosolic transport	0.0179586	MON2,PIP4K2A,TRAPPC10	rna_Spleen_c10,rna_Spleen_c3,rna_Spleen_c7,rna_Spleen_c6,rna_Spleen_c12,rna_Spleen_c14,rna_Spleen_c18,rna_Spleen_c21,rna_Spleen_c23
ADAM28	cluster_1	No	GO:0016567	BP	protein ubiquitination	0.0302255	BCL2,PJA2,SMURF2,TNKS	rna_Spleen_c10,rna_Spleen_c3,rna_Spleen_c7,rna_Spleen_c6,rna_Spleen_c12,rna_Spleen_c14,rna_Spleen_c18,rna_Spleen_c21,rna_Spleen_c23
ADAM28	cluster_1	No	GO:0017015	BP	regulation of transforming growth factor beta receptor signaling pathway	0.0287827	PMEPA1,SMURF2,ZEB2	rna_Spleen_c10,rna_Spleen_c3,rna_Spleen_c7,rna_Spleen_c6,rna_Spleen_c12,rna_Spleen_c14,rna_Spleen_c18,rna_Spleen_c21,rna_Spleen_c23
ADAM28	cluster_1	No	GO:0030177	BP	positive regulation of Wnt signaling pathway	0.035624	SMURF2,TNKS,ZEB2	rna_Spleen_c10,rna_Spleen_c3,rna_Spleen_c7,rna_Spleen_c6,rna_Spleen_c12,rna_Spleen_c14,rna_Spleen_c18,rna_Spleen_c21,rna_Spleen_c23
ADAM28	cluster_1	No	GO:0030335	BP	positive regulation of cell migration	0.0129736	BCAS3,CD74,DOCK8,HDAC9,MAPRE2,SMURF2	rna_Spleen_c10,rna_Spleen_c3,rna_Spleen_c7,rna_Spleen_c6,rna_Spleen_c12,rna_Spleen_c14,rna_Spleen_c18,rna_Spleen_c21,rna_Spleen_c23
ADAM28	cluster_1	No	GO:0032446	BP	protein modification by small protein conjugation	0.0430414	BCL2,PJA2,SMURF2,TNKS	rna_Spleen_c10,rna_Spleen_c3,rna_Spleen_c7,rna_Spleen_c6,rna_Spleen_c12,rna_Spleen_c14,rna_Spleen_c18,rna_Spleen_c21,rna_Spleen_c23
ADAM28	cluster_1	No	GO:0032878	BP	regulation of establishment or maintenance of cell polarity	0.0490215	BCAS3,DOCK8	rna_Spleen_c10,rna_Spleen_c3,rna_Spleen_c7,rna_Spleen_c6,rna_Spleen_c12,rna_Spleen_c14,rna_Spleen_c18,rna_Spleen_c21,rna_Spleen_c23
ADAM28	cluster_1	No	GO:0033043	BP	regulation of organelle organization	0.00989562	BCAS3,HNRNPA2B1,MAPRE2,NOTCH2,PIP4K2A,TNKS,ZEB2	rna_Spleen_c10,rna_Spleen_c3,rna_Spleen_c7,rna_Spleen_c6,rna_Spleen_c12,rna_Spleen_c14,rna_Spleen_c18,rna_Spleen_c21,rna_Spleen_c23
ADAM28	cluster_1	No	GO:0040017	BP	positive regulation of locomotion	0.015568	BCAS3,CD74,DOCK8,HDAC9,MAPRE2,SMURF2	rna_Spleen_c10,rna_Spleen_c3,rna_Spleen_c7,rna_Spleen_c6,rna_Spleen_c12,rna_Spleen_c14,rna_Spleen_c18,rna_Spleen_c21,rna_Spleen_c23
ADAM28	cluster_1	No	GO:0043085	BP	positive regulation of catalytic activity	0.00767149	BCAS3,CD74,CR1,DOCK8,HNRNPA2B1,MAPRE2,TCL1A,TNKS	rna_Spleen_c10,rna_Spleen_c3,rna_Spleen_c7,rna_Spleen_c6,rna_Spleen_c12,rna_Spleen_c14,rna_Spleen_c18,rna_Spleen_c21,rna_Spleen_c23
ADAM28	cluster_1	No	GO:0045321	BP	leukocyte activation	0.00137949	BCL2,CD74,DOCK8,HDAC9,IKZF1,IL21R,NOTCH2	rna_Spleen_c10,rna_Spleen_c3,rna_Spleen_c7,rna_Spleen_c6,rna_Spleen_c12,rna_Spleen_c14,rna_Spleen_c18,rna_Spleen_c21,rna_Spleen_c23
ADAM28	cluster_1	No	GO:0045892	BP	negative regulation of transcription, DNA-templated	0.0487283	BASP1,EPC1,HDAC9,IKZF1,SMURF2,ZEB2	rna_Spleen_c10,rna_Spleen_c3,rna_Spleen_c7,rna_Spleen_c6,rna_Spleen_c12,rna_Spleen_c14,rna_Spleen_c18,rna_Spleen_c21,rna_Spleen_c23
ADAM28	cluster_1	No	GO:0045934	BP	negative regulation of nucleobase-containing compound metabolic process	0.0194783	BASP1,EPC1,HDAC9,IKZF1,SMURF2,TNKS,ZEB2	rna_Spleen_c10,rna_Spleen_c3,rna_Spleen_c7,rna_Spleen_c6,rna_Spleen_c12,rna_Spleen_c14,rna_Spleen_c18,rna_Spleen_c21,rna_Spleen_c23
ADAM28	cluster_1	No	GO:0045944	BP	positive regulation of transcription by RNA polymerase II	0.011081	BCAS3,EPC1,SKAP1,SSBP2,TAF4B,TNKS,ZEB2	rna_Spleen_c10,rna_Spleen_c3,rna_Spleen_c7,rna_Spleen_c6,rna_Spleen_c12,rna_Spleen_c14,rna_Spleen_c18,rna_Spleen_c21,rna_Spleen_c23
ADAM28	cluster_1	No	GO:0046578	BP	regulation of Ras protein signal transduction	0.0287827	MAPRE2,NOTCH2,P2RY8	rna_Spleen_c10,rna_Spleen_c3,rna_Spleen_c7,rna_Spleen_c6,rna_Spleen_c12,rna_Spleen_c14,rna_Spleen_c18,rna_Spleen_c21,rna_Spleen_c23
ADAM28	cluster_1	No	GO:0046579	BP	positive regulation of Ras protein signal transduction	0.00744056	MAPRE2,NOTCH2,P2RY8	rna_Spleen_c10,rna_Spleen_c3,rna_Spleen_c7,rna_Spleen_c6,rna_Spleen_c12,rna_Spleen_c14,rna_Spleen_c18,rna_Spleen_c21,rna_Spleen_c23
ADAM28	cluster_1	No	GO:0046649	BP	lymphocyte activation	0.000275544	BCL2,CD74,DOCK8,HDAC9,IKZF1,IL21R,NOTCH2	rna_Spleen_c10,rna_Spleen_c3,rna_Spleen_c7,rna_Spleen_c6,rna_Spleen_c12,rna_Spleen_c14,rna_Spleen_c18,rna_Spleen_c21,rna_Spleen_c23
ADAM28	cluster_1	No	GO:0046907	BP	intracellular transport	0.00187937	CD74,HNRNPA2B1,MON2,MYO1E,PIP4K2A,TNPO3,TRAPPC10	rna_Spleen_c10,rna_Spleen_c3,rna_Spleen_c7,rna_Spleen_c6,rna_Spleen_c12,rna_Spleen_c14,rna_Spleen_c18,rna_Spleen_c21,rna_Spleen_c23
ADAM28	cluster_1	No	GO:0050776	BP	regulation of immune response	0.00767149	BCL2,CD74,CR1,IGHD,IGHM,PARP14,PJA2,SKAP1	rna_Spleen_c10,rna_Spleen_c3,rna_Spleen_c7,rna_Spleen_c6,rna_Spleen_c12,rna_Spleen_c14,rna_Spleen_c18,rna_Spleen_c21,rna_Spleen_c23
ADAM28	cluster_1	No	GO:0050778	BP	positive regulation of immune response	0.0295329	BCL2,CD74,CR1,IGHD,IGHM,SKAP1	rna_Spleen_c10,rna_Spleen_c3,rna_Spleen_c7,rna_Spleen_c6,rna_Spleen_c12,rna_Spleen_c14,rna_Spleen_c18,rna_Spleen_c21,rna_Spleen_c23
ADAM28	cluster_1	No	GO:0050864	BP	regulation of B cell activation	0.00817552	BCL2,CD74,CR1,IGHD,IGHM	rna_Spleen_c10,rna_Spleen_c3,rna_Spleen_c7,rna_Spleen_c6,rna_Spleen_c12,rna_Spleen_c14,rna_Spleen_c18,rna_Spleen_c21,rna_Spleen_c23
ADAM28	cluster_1	No	GO:0050865	BP	regulation of cell activation	0.0109301	BCL2,CD74,CR1,DOCK8,IGHD,IGHM,PJA2	rna_Spleen_c10,rna_Spleen_c3,rna_Spleen_c7,rna_Spleen_c6,rna_Spleen_c12,rna_Spleen_c14,rna_Spleen_c18,rna_Spleen_c21,rna_Spleen_c23
ADAM28	cluster_1	No	GO:0050867	BP	positive regulation of cell activation	0.0110101	BCL2,CD74,CR1,DOCK8,IGHD,IGHM	rna_Spleen_c10,rna_Spleen_c3,rna_Spleen_c7,rna_Spleen_c6,rna_Spleen_c12,rna_Spleen_c14,rna_Spleen_c18,rna_Spleen_c21,rna_Spleen_c23
ADAM28	cluster_1	No	GO:0050871	BP	positive regulation of B cell activation	0.0254069	BCL2,CD74,IGHD,IGHM	rna_Spleen_c10,rna_Spleen_c3,rna_Spleen_c7,rna_Spleen_c6,rna_Spleen_c12,rna_Spleen_c14,rna_Spleen_c18,rna_Spleen_c21,rna_Spleen_c23
ADAM28	cluster_1	No	GO:0051054	BP	positive regulation of DNA metabolic process	0.0438099	EPC1,HNRNPA2B1,TNKS	rna_Spleen_c10,rna_Spleen_c3,rna_Spleen_c7,rna_Spleen_c6,rna_Spleen_c12,rna_Spleen_c14,rna_Spleen_c18,rna_Spleen_c21,rna_Spleen_c23
ADAM28	cluster_1	No	GO:0051056	BP	regulation of small GTPase mediated signal transduction	0.0186051	DOCK8,MAPRE2,NOTCH2,P2RY8	rna_Spleen_c10,rna_Spleen_c3,rna_Spleen_c7,rna_Spleen_c6,rna_Spleen_c12,rna_Spleen_c14,rna_Spleen_c18,rna_Spleen_c21,rna_Spleen_c23
ADAM28	cluster_1	No	GO:0051057	BP	positive regulation of small GTPase mediated signal transduction	0.00981965	MAPRE2,NOTCH2,P2RY8	rna_Spleen_c10,rna_Spleen_c3,rna_Spleen_c7,rna_Spleen_c6,rna_Spleen_c12,rna_Spleen_c14,rna_Spleen_c18,rna_Spleen_c21,rna_Spleen_c23
ADAM28	cluster_1	No	GO:0051130	BP	positive regulation of cellular component organization	0.0112103	BCAS3,HNRNPA2B1,MAPRE2,PIP4K2A,SKAP1,TCL1A,TNKS	rna_Spleen_c10,rna_Spleen_c3,rna_Spleen_c7,rna_Spleen_c6,rna_Spleen_c12,rna_Spleen_c14,rna_Spleen_c18,rna_Spleen_c21,rna_Spleen_c23
ADAM28	cluster_1	No	GO:0051225	BP	spindle assembly	0.0248331	MAPRE2,TNKS	rna_Spleen_c10,rna_Spleen_c3,rna_Spleen_c7,rna_Spleen_c6,rna_Spleen_c12,rna_Spleen_c14,rna_Spleen_c18,rna_Spleen_c21,rna_Spleen_c23
ADAM28	cluster_1	No	GO:0051249	BP	regulation of lymphocyte activation	0.0184199	BCL2,CD74,CR1,DOCK8,IGHD,IGHM	rna_Spleen_c10,rna_Spleen_c3,rna_Spleen_c7,rna_Spleen_c6,rna_Spleen_c12,rna_Spleen_c14,rna_Spleen_c18,rna_Spleen_c21,rna_Spleen_c23
ADAM28	cluster_1	No	GO:0051251	BP	positive regulation of lymphocyte activation	0.00767149	BCL2,CD74,CR1,DOCK8,IGHD,IGHM	rna_Spleen_c10,rna_Spleen_c3,rna_Spleen_c7,rna_Spleen_c6,rna_Spleen_c12,rna_Spleen_c14,rna_Spleen_c18,rna_Spleen_c21,rna_Spleen_c23
ADAM28	cluster_1	No	GO:0051272	BP	positive regulation of cellular component movement	0.0139581	BCAS3,CD74,DOCK8,HDAC9,MAPRE2,SMURF2	rna_Spleen_c10,rna_Spleen_c3,rna_Spleen_c7,rna_Spleen_c6,rna_Spleen_c12,rna_Spleen_c14,rna_Spleen_c18,rna_Spleen_c21,rna_Spleen_c23
ADAM28	cluster_1	No	GO:0051641	BP	cellular localization	0.00214698	CD74,HNRNPA2B1,MAPRE2,MON2,MYO1E,PIP4K2A,TNKS,TNPO3,TRAPPC10	rna_Spleen_c10,rna_Spleen_c3,rna_Spleen_c7,rna_Spleen_c6,rna_Spleen_c12,rna_Spleen_c14,rna_Spleen_c18,rna_Spleen_c21,rna_Spleen_c23
ADAM28	cluster_1	No	GO:0051649	BP	establishment of localization in cell	0.0135999	CD74,HNRNPA2B1,MON2,MYO1E,PIP4K2A,TNPO3,TRAPPC10	rna_Spleen_c10,rna_Spleen_c3,rna_Spleen_c7,rna_Spleen_c6,rna_Spleen_c12,rna_Spleen_c14,rna_Spleen_c18,rna_Spleen_c21,rna_Spleen_c23
ADAM28	cluster_1	No	GO:0061024	BP	membrane organization	0.046691	BCL2,CR1,IGHD,IGHM,PIP4K2A	rna_Spleen_c10,rna_Spleen_c3,rna_Spleen_c7,rna_Spleen_c6,rna_Spleen_c12,rna_Spleen_c14,rna_Spleen_c18,rna_Spleen_c21,rna_Spleen_c23
ADAM28	cluster_1	No	GO:0070212	BP	protein poly-ADP-ribosylation	0.00790752	PARP14,TNKS	rna_Spleen_c10,rna_Spleen_c3,rna_Spleen_c7,rna_Spleen_c6,rna_Spleen_c12,rna_Spleen_c14,rna_Spleen_c18,rna_Spleen_c21,rna_Spleen_c23
ADAM28	cluster_1	No	GO:0090263	BP	positive regulation of canonical Wnt signaling pathway	0.0179586	SMURF2,TNKS,ZEB2	rna_Spleen_c10,rna_Spleen_c3,rna_Spleen_c7,rna_Spleen_c6,rna_Spleen_c12,rna_Spleen_c14,rna_Spleen_c18,rna_Spleen_c21,rna_Spleen_c23
ADAM28	cluster_1	No	GO:1901797	BP	negative regulation of signal transduction by p53 class mediator	0.0248331	BCL2,CD74	rna_Spleen_c10,rna_Spleen_c3,rna_Spleen_c7,rna_Spleen_c6,rna_Spleen_c12,rna_Spleen_c14,rna_Spleen_c18,rna_Spleen_c21,rna_Spleen_c23
ADAM28	cluster_1	No	GO:1902165	BP	regulation of intrinsic apoptotic signaling pathway in response to DNA damage by p53 class mediator	0.0357937	BCL2,CD74	rna_Spleen_c10,rna_Spleen_c3,rna_Spleen_c7,rna_Spleen_c6,rna_Spleen_c12,rna_Spleen_c14,rna_Spleen_c18,rna_Spleen_c21,rna_Spleen_c23
ADAM28	cluster_1	No	GO:1902166	BP	negative regulation of intrinsic apoptotic signaling pathway in response to DNA damage by p53 class mediator	0.0248331	BCL2,CD74	rna_Spleen_c10,rna_Spleen_c3,rna_Spleen_c7,rna_Spleen_c6,rna_Spleen_c12,rna_Spleen_c14,rna_Spleen_c18,rna_Spleen_c21,rna_Spleen_c23
ADAM28	cluster_1	No	GO:1902253	BP	regulation of intrinsic apoptotic signaling pathway by p53 class mediator	0.0490215	BCL2,CD74	rna_Spleen_c10,rna_Spleen_c3,rna_Spleen_c7,rna_Spleen_c6,rna_Spleen_c12,rna_Spleen_c14,rna_Spleen_c18,rna_Spleen_c21,rna_Spleen_c23
ADAM28	cluster_1	No	GO:1902254	BP	negative regulation of intrinsic apoptotic signaling pathway by p53 class mediator	0.0248331	BCL2,CD74	rna_Spleen_c10,rna_Spleen_c3,rna_Spleen_c7,rna_Spleen_c6,rna_Spleen_c12,rna_Spleen_c14,rna_Spleen_c18,rna_Spleen_c21,rna_Spleen_c23
ADAM28	cluster_1	No	GO:1902679	BP	negative regulation of RNA biosynthetic process	0.0493102	BASP1,EPC1,HDAC9,IKZF1,SMURF2,ZEB2	rna_Spleen_c10,rna_Spleen_c3,rna_Spleen_c7,rna_Spleen_c6,rna_Spleen_c12,rna_Spleen_c14,rna_Spleen_c18,rna_Spleen_c21,rna_Spleen_c23
ADAM28	cluster_1	No	GO:1903507	BP	negative regulation of nucleic acid-templated transcription	0.0487283	BASP1,EPC1,HDAC9,IKZF1,SMURF2,ZEB2	rna_Spleen_c10,rna_Spleen_c3,rna_Spleen_c7,rna_Spleen_c6,rna_Spleen_c12,rna_Spleen_c14,rna_Spleen_c18,rna_Spleen_c21,rna_Spleen_c23
ADAM28	cluster_1	No	GO:1903844	BP	regulation of cellular response to transforming growth factor beta stimulus	0.03171	PMEPA1,SMURF2,ZEB2	rna_Spleen_c10,rna_Spleen_c3,rna_Spleen_c7,rna_Spleen_c6,rna_Spleen_c12,rna_Spleen_c14,rna_Spleen_c18,rna_Spleen_c21,rna_Spleen_c23
ADAM28	cluster_1	No	GO:2000114	BP	regulation of establishment of cell polarity	0.0248331	BCAS3,DOCK8	rna_Spleen_c10,rna_Spleen_c3,rna_Spleen_c7,rna_Spleen_c6,rna_Spleen_c12,rna_Spleen_c14,rna_Spleen_c18,rna_Spleen_c21,rna_Spleen_c23
ADAM28	cluster_1	No	GO:2000147	BP	positive regulation of cell motility	0.0135999	BCAS3,CD74,DOCK8,HDAC9,MAPRE2,SMURF2	rna_Spleen_c10,rna_Spleen_c3,rna_Spleen_c7,rna_Spleen_c6,rna_Spleen_c12,rna_Spleen_c14,rna_Spleen_c18,rna_Spleen_c21,rna_Spleen_c23
ADAM28	cluster_5	No	GO:0031347	BP	regulation of defense response	0.00446067	A2M,APOE,LPL,LRFN5,NUPR1,S100A8,S100A9,TYROBP	rna_Lung_c31
ADAM28	cluster_5	No	GO:0031349	BP	positive regulation of defense response	0.0388042	LPL,NUPR1,S100A8,S100A9,TYROBP	rna_Lung_c31
ADAM28	cluster_5	No	GO:0032101	BP	regulation of response to external stimulus	0.0358981	A2M,APOE,LPL,LRFN5,NUPR1,S100A8,S100A9,TYROBP	rna_Lung_c31
ADAM28	cluster_5	No	GO:0032119	BP	sequestering of zinc ion	0.0402565	S100A8,S100A9	rna_Lung_c31
ADAM28	cluster_5	No	GO:0050727	BP	regulation of inflammatory response	0.0259627	APOE,LPL,LRFN5,NUPR1,S100A8,S100A9	rna_Lung_c31
ADAM28	cluster_5	No	GO:0050729	BP	positive regulation of inflammatory response	0.0402565	LPL,NUPR1,S100A8,S100A9	rna_Lung_c31
ADAM28	cluster_5	No	GO:0070488	BP	neutrophil aggregation	0.0402565	S100A8,S100A9	rna_Lung_c31
ADAM28	cluster_5	No	GO:0080134	BP	regulation of response to stress	0.0259627	A2M,APOE,LPL,LRFN5,NUPR1,PPP1R15B,S100A8,S100A9,TYROBP	rna_Lung_c31
ADAM28	cluster_5	No	GO:1901214	BP	regulation of neuron death	0.0274912	APOE,C1QA,GPNMB,NUPR1,TYROBP	rna_Lung_c31
ADAM28	cluster_5	No	GO:2001244	BP	positive regulation of intrinsic apoptotic signaling pathway	0.0358981	NUPR1,S100A8,S100A9	rna_Lung_c31
ADAMTS1	cluster_0	No	GO:0006047	BP	UDP-N-acetylglucosamine metabolic process	0.0221411	GFPT2,UAP1	rna_Large_Intestine_c6,rna_Large_Intestine_c17
ADAMTS1	cluster_0	No	GO:0006048	BP	UDP-N-acetylglucosamine biosynthetic process	0.0221411	GFPT2,UAP1	rna_Large_Intestine_c6,rna_Large_Intestine_c17
ADAMTS1	cluster_0	No	GO:0006909	BP	phagocytosis	0.0467039	ANXA1,ITGAV,ITGB1	rna_Large_Intestine_c6,rna_Large_Intestine_c17
ADAMTS1	cluster_0	No	GO:0009225	BP	nucleotide-sugar metabolic process	0.0467039	GFPT2,UAP1	rna_Large_Intestine_c6,rna_Large_Intestine_c17
ADAMTS1	cluster_0	No	GO:0009226	BP	nucleotide-sugar biosynthetic process	0.0221411	GFPT2,UAP1	rna_Large_Intestine_c6,rna_Large_Intestine_c17
ADAMTS1	cluster_0	No	GO:0016192	BP	vesicle-mediated transport	0.0241718	ANXA1,CLTC,ITGAV,ITGB1,PGAP1,SGIP1,SYTL4	rna_Large_Intestine_c6,rna_Large_Intestine_c17
ADAMTS1	cluster_0	No	GO:0046349	BP	amino sugar biosynthetic process	0.0221411	GFPT2,UAP1	rna_Large_Intestine_c6,rna_Large_Intestine_c17
ADAMTS1	cluster_0	No	GO:0048268	BP	clathrin coat assembly	0.0221411	CLTC,SGIP1	rna_Large_Intestine_c6,rna_Large_Intestine_c17
ADAMTS1	cluster_0	No	GO:0055086	BP	nucleobase-containing small molecule metabolic process	0.0467039	ACSM3,GFPT2,NAMPT,UAP1	rna_Large_Intestine_c6,rna_Large_Intestine_c17
ADAMTS1	cluster_0	No	GO:0072583	BP	clathrin-dependent endocytosis	0.0221411	CLTC,SGIP1	rna_Large_Intestine_c6,rna_Large_Intestine_c17
ADAMTS1	cluster_0	No	GO:1901135	BP	carbohydrate derivative metabolic process	0.00811539	ACSM3,GFPT2,PGAP1,ST8SIA1,SULF1,UAP1	rna_Large_Intestine_c6,rna_Large_Intestine_c17
ADAMTS1	cluster_2	No	GO:0001817	BP	regulation of cytokine production	0.0252945	CLU,EGR1,IL1R1,IL33,LTBP1,PLCG2,SULF1	rna_Large_Intestine_c12
ADAMTS1	cluster_2	No	GO:0001819	BP	positive regulation of cytokine production	0.0256712	CLU,EGR1,IL1R1,IL33,PLCG2,SULF1	rna_Large_Intestine_c12
ADAMTS1	cluster_2	No	GO:0051090	BP	regulation of DNA-binding transcription factor activity	0.0333578	CLU,EGLN1,PLCG2,PPARG,RNF220	rna_Large_Intestine_c12
ADAMTS1	cluster_2	No	GO:0051091	BP	positive regulation of DNA-binding transcription factor activity	0.0434246	CLU,PLCG2,PPARG,RNF220	rna_Large_Intestine_c12
ADAMTS1	cluster_2	No	GO:0098657	BP	import into cell	0.0389329	ATP1B3,FAM155A,NEURL1B,SLC2A3	rna_Large_Intestine_c12
ADAMTS1	cluster_2	No	GO:1902949	BP	positive regulation of tau-protein kinase activity	0.0410066	CLU,EGR1	rna_Large_Intestine_c12
ADAMTS1	cluster_2	No	GO:1903961	BP	positive regulation of anion transmembrane transport	0.0410066	ABCB1,ITGB1	rna_Large_Intestine_c12
ADAMTS1	cluster_2	Yes	GO:0030198	BP	extracellular matrix organization	0.0256712	ADAMTS9,HMCN1,POSTN,SULF1,TLL1	rna_Large_Intestine_c12
ADAMTS1	cluster_2	Yes	GO:0030334	BP	regulation of cell migration	0.00491999	ADAMTS9,CDH13,ENPP2,IGFBP3,ITGB1,PLCG2,PLVAP,PPARG,SULF1	rna_Large_Intestine_c12
ADAMTS1	cluster_2	Yes	GO:0040012	BP	regulation of locomotion	0.00161092	ADAMTS9,CDH13,ENPP2,IGFBP3,ITGB1,PLCG2,PLVAP,PPARG,SULF1,TACR1	rna_Large_Intestine_c12
ADAMTS1	cluster_2	Yes	GO:0040017	BP	positive regulation of locomotion	0.0410066	CDH13,ENPP2,ITGB1,PLCG2,PLVAP,TACR1	rna_Large_Intestine_c12
ADAMTS1	cluster_2	Yes	GO:0043062	BP	extracellular structure organization	0.0256712	ADAMTS9,HMCN1,POSTN,SULF1,TLL1	rna_Large_Intestine_c12
ADAMTS1	cluster_2	Yes	GO:0045229	BP	external encapsulating structure organization	0.0256712	ADAMTS9,HMCN1,POSTN,SULF1,TLL1	rna_Large_Intestine_c12
ADAMTS1	cluster_2	Yes	GO:0045765	BP	regulation of angiogenesis	0.0256712	ADAMTS9,EGLN1,ITGB1,PPARG,SULF1	rna_Large_Intestine_c12
ADAMTS1	cluster_2	Yes	GO:0051270	BP	regulation of cellular component movement	0.00171855	ADAMTS9,CDH13,ENPP2,IGFBP3,ITGB1,PLCG2,PLVAP,PPARG,SULF1,TACR1	rna_Large_Intestine_c12
ADAMTS1	cluster_2	Yes	GO:0051272	BP	positive regulation of cellular component movement	0.0389329	CDH13,ENPP2,ITGB1,PLCG2,PLVAP,TACR1	rna_Large_Intestine_c12
ADAMTS1	cluster_2	Yes	GO:1901342	BP	regulation of vasculature development	0.0256712	ADAMTS9,EGLN1,ITGB1,PPARG,SULF1	rna_Large_Intestine_c12
ADAMTS1	cluster_2	Yes	GO:2000145	BP	regulation of cell motility	0.00151474	ADAMTS9,CDH13,ENPP2,IGFBP3,ITGB1,PLCG2,PLVAP,PPARG,SULF1,TACR1	rna_Large_Intestine_c12
ADAMTS1	cluster_2	Yes	GO:2000147	BP	positive regulation of cell motility	0.0389329	CDH13,ENPP2,ITGB1,PLCG2,PLVAP,TACR1	rna_Large_Intestine_c12
ADAMTS2	cluster_1	No	GO:0007155	BP	cell adhesion	8.79128e-05	ANTXR1,CDH11,CNTN4,GPC6,HMCN1,IL1RAPL1,NFASC,NLGN1,ROBO1,SDK1,TLN2	rna_Lung_c2,rna_Large_Intestine_c6,rna_Lung_c23,rna_Large_Intestine_c17,rna_Large_Intestine_c19
ADAMTS2	cluster_1	No	GO:0007156	BP	homophilic cell adhesion via plasma membrane adhesion molecules	0.0169961	CNTN4,HMCN1,ROBO1,SDK1	rna_Lung_c2,rna_Large_Intestine_c6,rna_Lung_c23,rna_Large_Intestine_c17,rna_Large_Intestine_c19
ADAMTS2	cluster_1	No	GO:0009653	BP	anatomical structure morphogenesis	0.00826901	ANTXR1,CCBE1,CDH11,CNTN4,ECE1,FREM1,NLGN1,ROBO1,SLIT3	rna_Lung_c2,rna_Large_Intestine_c6,rna_Lung_c23,rna_Large_Intestine_c17,rna_Large_Intestine_c19
ADAMTS2	cluster_1	No	GO:0022610	BP	biological adhesion	8.79128e-05	ANTXR1,CDH11,CNTN4,GPC6,HMCN1,IL1RAPL1,NFASC,NLGN1,ROBO1,SDK1,TLN2	rna_Lung_c2,rna_Large_Intestine_c6,rna_Lung_c23,rna_Large_Intestine_c17,rna_Large_Intestine_c19
ADAMTS2	cluster_1	No	GO:0048513	BP	animal organ development	0.0308674	ANXA1,CNTN4,COL5A3,ECE1,NFASC,SGCD,SOX6	rna_Lung_c2,rna_Large_Intestine_c6,rna_Lung_c23,rna_Large_Intestine_c17,rna_Large_Intestine_c19
ADAMTS2	cluster_1	No	GO:0048731	BP	system development	0.0134794	CDH11,CNTN4,NFASC,NLGN1,ROBO1,SOX6,XYLT1	rna_Lung_c2,rna_Large_Intestine_c6,rna_Lung_c23,rna_Large_Intestine_c17,rna_Large_Intestine_c19
ADAMTS2	cluster_1	No	GO:0098609	BP	cell-cell adhesion	4.6172e-05	CDH11,CNTN4,GPC6,HMCN1,IL1RAPL1,NFASC,NLGN1,ROBO1,SDK1,TLN2	rna_Lung_c2,rna_Large_Intestine_c6,rna_Lung_c23,rna_Large_Intestine_c17,rna_Large_Intestine_c19
ADAMTS2	cluster_1	No	GO:0098742	BP	cell-cell adhesion via plasma-membrane adhesion molecules	4.6172e-05	CDH11,CNTN4,GPC6,HMCN1,IL1RAPL1,NLGN1,ROBO1,SDK1	rna_Lung_c2,rna_Large_Intestine_c6,rna_Lung_c23,rna_Large_Intestine_c17,rna_Large_Intestine_c19
ADAMTS2	cluster_1	No	GO:1901888	BP	regulation of cell junction assembly	0.0041733	ARHGAP6,GPC6,IL1RAPL1,NLGN1,PHLDB2	rna_Lung_c2,rna_Large_Intestine_c6,rna_Lung_c23,rna_Large_Intestine_c17,rna_Large_Intestine_c19
ADAMTS2	cluster_2	No	GO:0009628	BP	response to abiotic stimulus	0.0165866	AQP9,ATP6AP1,CRIP1,HMOX1,PPARG,RGCC	rna_Liver_c10
ADAMTS2	cluster_2	No	GO:0010629	BP	negative regulation of gene expression	0.0261251	ARRB1,DAPK1,GPNMB,PARP14,PPARG,RGCC	rna_Liver_c10
ADAMTS2	cluster_2	No	GO:0010632	BP	regulation of epithelial cell migration	0.0432859	HMOX1,MAPRE2,PPARG,RGCC	rna_Liver_c10
ADAMTS2	cluster_2	No	GO:0022603	BP	regulation of anatomical structure morphogenesis	0.0154188	GPNMB,HMOX1,ITGAX,MSN,PPARG,RAC2,RGCC	rna_Liver_c10
ADAMTS2	cluster_2	No	GO:0030334	BP	regulation of cell migration	0.0103648	GPNMB,HMOX1,ITGAX,MAPRE2,MSN,PPARG,RAC2,RGCC	rna_Liver_c10
ADAMTS2	cluster_2	No	GO:0032269	BP	negative regulation of cellular protein metabolic process	0.0226722	ARRB1,DAPK1,PARP14,PPARG,RPS6KA3,UBASH3B	rna_Liver_c10
ADAMTS2	cluster_2	No	GO:0033554	BP	cellular response to stress	0.0359906	CRIP1,DAPK1,HMOX1,PPARG,RGCC,RPS6KA3	rna_Liver_c10
ADAMTS2	cluster_2	No	GO:0034103	BP	regulation of tissue remodeling	0.0154188	GPNMB,PPARG,UBASH3B	rna_Liver_c10
ADAMTS2	cluster_2	No	GO:0034104	BP	negative regulation of tissue remodeling	0.0350975	PPARG,UBASH3B	rna_Liver_c10
ADAMTS2	cluster_2	No	GO:0036294	BP	cellular response to decreased oxygen levels	0.0264963	HMOX1,PPARG,RGCC	rna_Liver_c10
ADAMTS2	cluster_2	No	GO:0040012	BP	regulation of locomotion	0.01353	GPNMB,HMOX1,ITGAX,MAPRE2,MSN,PPARG,RAC2,RGCC	rna_Liver_c10
ADAMTS2	cluster_2	No	GO:0043535	BP	regulation of blood vessel endothelial cell migration	0.0300401	HMOX1,PPARG,RGCC	rna_Liver_c10
ADAMTS2	cluster_2	No	GO:0045765	BP	regulation of angiogenesis	0.0146969	GPNMB,HMOX1,ITGAX,PPARG,RGCC	rna_Liver_c10
ADAMTS2	cluster_2	No	GO:0051056	BP	regulation of small GTPase mediated signal transduction	0.0279939	ARHGAP10,ARRB1,MAPRE2,PREX1	rna_Liver_c10
ADAMTS2	cluster_2	No	GO:0051090	BP	regulation of DNA-binding transcription factor activity	0.019163	ARRB1,ERC1,HMOX1,PPARG,RGCC	rna_Liver_c10
ADAMTS2	cluster_2	No	GO:0051248	BP	negative regulation of protein metabolic process	0.0261251	ARRB1,DAPK1,PARP14,PPARG,RPS6KA3,UBASH3B	rna_Liver_c10
ADAMTS2	cluster_2	No	GO:0051270	BP	regulation of cellular component movement	0.0147777	GPNMB,HMOX1,ITGAX,MAPRE2,MSN,PPARG,RAC2,RGCC	rna_Liver_c10
ADAMTS2	cluster_2	No	GO:0052548	BP	regulation of endopeptidase activity	0.0498968	ASPH,DAPK1,PPARG,RPS6KA3	rna_Liver_c10
ADAMTS2	cluster_2	No	GO:0060331	BP	negative regulation of response to interferon-gamma	0.0350975	PARP14,PPARG	rna_Liver_c10
ADAMTS2	cluster_2	No	GO:0060336	BP	negative regulation of interferon-gamma-mediated signaling pathway	0.0350975	PARP14,PPARG	rna_Liver_c10
ADAMTS2	cluster_2	No	GO:0070482	BP	response to oxygen levels	0.011844	ATP6AP1,HMOX1,PPARG,RGCC	rna_Liver_c10
ADAMTS2	cluster_2	No	GO:0071453	BP	cellular response to oxygen levels	0.0033774	ATP6AP1,HMOX1,PPARG,RGCC	rna_Liver_c10
ADAMTS2	cluster_2	No	GO:0071456	BP	cellular response to hypoxia	0.0264963	HMOX1,PPARG,RGCC	rna_Liver_c10
ADAMTS2	cluster_2	No	GO:0071593	BP	lymphocyte aggregation	0.0130241	MSN,RAC2	rna_Liver_c10
ADAMTS2	cluster_2	No	GO:0071702	BP	organic substance transport	0.042544	AQP9,ATP6AP1,ATP8B4,PITPNA,PPARG,RBP7,SLC1A3	rna_Liver_c10
ADAMTS2	cluster_2	No	GO:1901342	BP	regulation of vasculature development	0.015027	GPNMB,HMOX1,ITGAX,PPARG,RGCC	rna_Liver_c10
ADAMTS2	cluster_2	No	GO:1901991	BP	negative regulation of mitotic cell cycle phase transition	0.0408059	GPNMB,RGCC,TEX14	rna_Liver_c10
ADAMTS2	cluster_2	No	GO:2000116	BP	regulation of cysteine-type endopeptidase activity	0.0146969	ASPH,DAPK1,PPARG,RPS6KA3	rna_Liver_c10
ADAMTS2	cluster_2	No	GO:2000145	BP	regulation of cell motility	0.011844	GPNMB,HMOX1,ITGAX,MAPRE2,MSN,PPARG,RAC2,RGCC	rna_Liver_c10
ADAMTS2	cluster_2	No	GO:2001056	BP	positive regulation of cysteine-type endopeptidase activity	0.0359906	ASPH,DAPK1,PPARG	rna_Liver_c10
ADAMTS9	cluster_10	No	GO:0010975	BP	regulation of neuron projection development	0.0244375	CRMP1,NLGN1,NRP1,SLIT2,ULK4	rna_Kidney_c2
ADAMTS9	cluster_10	No	GO:0016049	BP	cell growth	0.0244375	NRP1,SLIT2,SLIT3	rna_Kidney_c2
ADAMTS9	cluster_10	No	GO:0031344	BP	regulation of cell projection organization	0.000324696	CRMP1,ENPP2,EPS8L2,NLGN1,NRP1,PPP1R16B,SLIT2,ULK4	rna_Kidney_c2
ADAMTS9	cluster_10	No	GO:0031346	BP	positive regulation of cell projection organization	0.0108566	ENPP2,EPS8L2,NLGN1,NRP1,SLIT2	rna_Kidney_c2
ADAMTS9	cluster_10	No	GO:0048588	BP	developmental cell growth	0.0244375	NRP1,SLIT2,SLIT3	rna_Kidney_c2
ADAMTS9	cluster_10	No	GO:0048675	BP	axon extension	0.00759465	NRP1,SLIT2,SLIT3	rna_Kidney_c2
ADAMTS9	cluster_10	No	GO:0048846	BP	axon extension involved in axon guidance	0.00204612	NRP1,SLIT2,SLIT3	rna_Kidney_c2
ADAMTS9	cluster_10	No	GO:0051414	BP	response to cortisol	0.0260483	SLIT2,SLIT3	rna_Kidney_c2
ADAMTS9	cluster_10	No	GO:0051489	BP	regulation of filopodium assembly	0.0341104	NLGN1,NRP1,PPP1R16B	rna_Kidney_c2
ADAMTS9	cluster_10	No	GO:0060491	BP	regulation of cell projection assembly	0.00204612	EPS8L2,NLGN1,NRP1,PPP1R16B,SLIT2	rna_Kidney_c2
ADAMTS9	cluster_10	No	GO:0060560	BP	developmental growth involved in morphogenesis	0.0228443	NRP1,SLIT2,SLIT3	rna_Kidney_c2
ADAMTS9	cluster_10	No	GO:0120032	BP	regulation of plasma membrane bounded cell projection assembly	0.00204612	EPS8L2,NLGN1,NRP1,PPP1R16B,SLIT2	rna_Kidney_c2
ADAMTS9	cluster_10	No	GO:0120035	BP	regulation of plasma membrane bounded cell projection organization	0.000324696	CRMP1,ENPP2,EPS8L2,NLGN1,NRP1,PPP1R16B,SLIT2,ULK4	rna_Kidney_c2
ADAMTS9	cluster_10	No	GO:1900029	BP	positive regulation of ruffle assembly	0.0260483	EPS8L2,NLGN1	rna_Kidney_c2
ADAMTS9	cluster_10	No	GO:1902284	BP	neuron projection extension involved in neuron projection guidance	0.00204612	NRP1,SLIT2,SLIT3	rna_Kidney_c2
ADAMTS9	cluster_10	No	GO:1990138	BP	neuron projection extension	0.0168385	NRP1,SLIT2,SLIT3	rna_Kidney_c2
ADAMTS9	cluster_2	No	GO:0000209	BP	protein polyubiquitination	0.0359786	SMURF2,TNKS,ZNRF1	rna_Large_Intestine_c2,rna_Large_Intestine_c9,rna_Large_Intestine_c13,rna_Large_Intestine_c3,rna_Large_Intestine_c22
ADAMTS9	cluster_2	No	GO:0001932	BP	regulation of protein phosphorylation	0.0318539	INSR,LDLRAD4,ROBO1,RPTOR,SLIT2,TAB2,XRCC5	rna_Large_Intestine_c2,rna_Large_Intestine_c9,rna_Large_Intestine_c13,rna_Large_Intestine_c3,rna_Large_Intestine_c22
ADAMTS9	cluster_2	No	GO:0003013	BP	circulatory system process	0.00861663	ABCC1,ABCC4,INSR,SGCD,SLIT2	rna_Large_Intestine_c2,rna_Large_Intestine_c9,rna_Large_Intestine_c13,rna_Large_Intestine_c3,rna_Large_Intestine_c22
ADAMTS9	cluster_2	No	GO:0003018	BP	vascular process in circulatory system	0.0329617	ABCC1,ABCC4,INSR,SLIT2	rna_Large_Intestine_c2,rna_Large_Intestine_c9,rna_Large_Intestine_c13,rna_Large_Intestine_c3,rna_Large_Intestine_c22
ADAMTS9	cluster_2	No	GO:0006793	BP	phosphorus metabolic process	0.0329624	DAPK1,INPP4B,INSR,NAMPT,PTPRA,RPTOR,TNKS	rna_Large_Intestine_c2,rna_Large_Intestine_c9,rna_Large_Intestine_c13,rna_Large_Intestine_c3,rna_Large_Intestine_c22
ADAMTS9	cluster_2	No	GO:0006796	BP	phosphate-containing compound metabolic process	0.0318539	DAPK1,INPP4B,INSR,NAMPT,PTPRA,RPTOR,TNKS	rna_Large_Intestine_c2,rna_Large_Intestine_c9,rna_Large_Intestine_c13,rna_Large_Intestine_c3,rna_Large_Intestine_c22
ADAMTS9	cluster_2	No	GO:0009890	BP	negative regulation of biosynthetic process	0.00141891	DAPK1,HDAC9,KAT6A,RFX3,RUNX1T1,SMURF2,WWC2,XRCC5,ZHX2	rna_Large_Intestine_c2,rna_Large_Intestine_c9,rna_Large_Intestine_c13,rna_Large_Intestine_c3,rna_Large_Intestine_c22
ADAMTS9	cluster_2	No	GO:0010232	BP	vascular transport	0.0395459	ABCC1,ABCC4,INSR	rna_Large_Intestine_c2,rna_Large_Intestine_c9,rna_Large_Intestine_c13,rna_Large_Intestine_c3,rna_Large_Intestine_c22
ADAMTS9	cluster_2	No	GO:0010243	BP	response to organonitrogen compound	0.0165287	ABCC1,HDAC9,INSR,RPTOR,SLIT2	rna_Large_Intestine_c2,rna_Large_Intestine_c9,rna_Large_Intestine_c13,rna_Large_Intestine_c3,rna_Large_Intestine_c22
ADAMTS9	cluster_2	No	GO:0010558	BP	negative regulation of macromolecule biosynthetic process	0.00100659	DAPK1,HDAC9,KAT6A,RFX3,RUNX1T1,SMURF2,WWC2,XRCC5,ZHX2	rna_Large_Intestine_c2,rna_Large_Intestine_c9,rna_Large_Intestine_c13,rna_Large_Intestine_c3,rna_Large_Intestine_c22
ADAMTS9	cluster_2	No	GO:0010639	BP	negative regulation of organelle organization	0.0188893	CAPZA1,PHLDB2,SLIT2,TNKS	rna_Large_Intestine_c2,rna_Large_Intestine_c9,rna_Large_Intestine_c13,rna_Large_Intestine_c3,rna_Large_Intestine_c22
ADAMTS9	cluster_2	No	GO:0012501	BP	programmed cell death	0.0431229	DAPK1,MAGI3,SLIT2,TRPM7	rna_Large_Intestine_c2,rna_Large_Intestine_c9,rna_Large_Intestine_c13,rna_Large_Intestine_c3,rna_Large_Intestine_c22
ADAMTS9	cluster_2	No	GO:0016567	BP	protein ubiquitination	0.00390421	PJA2,RNF38,SMURF2,TNKS,ZNRF1	rna_Large_Intestine_c2,rna_Large_Intestine_c9,rna_Large_Intestine_c13,rna_Large_Intestine_c3,rna_Large_Intestine_c22
ADAMTS9	cluster_2	No	GO:0018193	BP	peptidyl-amino acid modification	0.0445233	HDAC9,INSR,KAT6A,SENP7,TNKS	rna_Large_Intestine_c2,rna_Large_Intestine_c9,rna_Large_Intestine_c13,rna_Large_Intestine_c3,rna_Large_Intestine_c22
ADAMTS9	cluster_2	No	GO:0021836	BP	chemorepulsion involved in postnatal olfactory bulb interneuron migration	0.00702891	ROBO1,SLIT2	rna_Large_Intestine_c2,rna_Large_Intestine_c9,rna_Large_Intestine_c13,rna_Large_Intestine_c3,rna_Large_Intestine_c22
ADAMTS9	cluster_2	No	GO:0030111	BP	regulation of Wnt signaling pathway	0.0175082	SMURF2,SPIN1,TNKS,UBAC2	rna_Large_Intestine_c2,rna_Large_Intestine_c9,rna_Large_Intestine_c13,rna_Large_Intestine_c3,rna_Large_Intestine_c22
ADAMTS9	cluster_2	No	GO:0030177	BP	positive regulation of Wnt signaling pathway	0.0395459	SMURF2,SPIN1,TNKS	rna_Large_Intestine_c2,rna_Large_Intestine_c9,rna_Large_Intestine_c13,rna_Large_Intestine_c3,rna_Large_Intestine_c22
ADAMTS9	cluster_2	No	GO:0031327	BP	negative regulation of cellular biosynthetic process	0.00134932	DAPK1,HDAC9,KAT6A,RFX3,RUNX1T1,SMURF2,WWC2,XRCC5,ZHX2	rna_Large_Intestine_c2,rna_Large_Intestine_c9,rna_Large_Intestine_c13,rna_Large_Intestine_c3,rna_Large_Intestine_c22
ADAMTS9	cluster_2	No	GO:0031333	BP	negative regulation of protein-containing complex assembly	0.047811	CAPZA1,LDLRAD4,SLIT2	rna_Large_Intestine_c2,rna_Large_Intestine_c9,rna_Large_Intestine_c13,rna_Large_Intestine_c3,rna_Large_Intestine_c22
ADAMTS9	cluster_2	No	GO:0032446	BP	protein modification by small protein conjugation	0.00620404	PJA2,RNF38,SMURF2,TNKS,ZNRF1	rna_Large_Intestine_c2,rna_Large_Intestine_c9,rna_Large_Intestine_c13,rna_Large_Intestine_c3,rna_Large_Intestine_c22
ADAMTS9	cluster_2	No	GO:0033043	BP	regulation of organelle organization	0.0456598	CAPZA1,INSR,PHLDB2,SLIT2,TNKS,XRCC5	rna_Large_Intestine_c2,rna_Large_Intestine_c9,rna_Large_Intestine_c13,rna_Large_Intestine_c3,rna_Large_Intestine_c22
ADAMTS9	cluster_2	No	GO:0033554	BP	cellular response to stress	0.0303316	ABCC1,DAPK1,KAT6A,MACROD2,RPTOR,XRCC5	rna_Large_Intestine_c2,rna_Large_Intestine_c9,rna_Large_Intestine_c13,rna_Large_Intestine_c3,rna_Large_Intestine_c22
ADAMTS9	cluster_2	No	GO:0033674	BP	positive regulation of kinase activity	0.0303316	INSR,ROBO1,RPTOR,TAB2,XRCC5	rna_Large_Intestine_c2,rna_Large_Intestine_c9,rna_Large_Intestine_c13,rna_Large_Intestine_c3,rna_Large_Intestine_c22
ADAMTS9	cluster_2	No	GO:0035385	BP	Roundabout signaling pathway	0.0165287	ROBO1,SLIT2	rna_Large_Intestine_c2,rna_Large_Intestine_c9,rna_Large_Intestine_c13,rna_Large_Intestine_c3,rna_Large_Intestine_c22
ADAMTS9	cluster_2	No	GO:0043085	BP	positive regulation of catalytic activity	0.0307868	DAPK1,INSR,ROBO1,RPTOR,TAB2,TNKS,XRCC5	rna_Large_Intestine_c2,rna_Large_Intestine_c9,rna_Large_Intestine_c13,rna_Large_Intestine_c3,rna_Large_Intestine_c22
ADAMTS9	cluster_2	No	GO:0044087	BP	regulation of cellular component biogenesis	0.0329617	CAPZA1,LDLRAD4,PHLDB2,PTPRA,SLIT2,XRCC5	rna_Large_Intestine_c2,rna_Large_Intestine_c9,rna_Large_Intestine_c13,rna_Large_Intestine_c3,rna_Large_Intestine_c22
ADAMTS9	cluster_2	No	GO:0045860	BP	positive regulation of protein kinase activity	0.0168486	INSR,ROBO1,RPTOR,TAB2,XRCC5	rna_Large_Intestine_c2,rna_Large_Intestine_c9,rna_Large_Intestine_c13,rna_Large_Intestine_c3,rna_Large_Intestine_c22
ADAMTS9	cluster_2	No	GO:0045892	BP	negative regulation of transcription, DNA-templated	0.00223475	HDAC9,KAT6A,RFX3,RUNX1T1,SMURF2,WWC2,XRCC5,ZHX2	rna_Large_Intestine_c2,rna_Large_Intestine_c9,rna_Large_Intestine_c13,rna_Large_Intestine_c3,rna_Large_Intestine_c22
ADAMTS9	cluster_2	No	GO:0045934	BP	negative regulation of nucleobase-containing compound metabolic process	0.00100659	HDAC9,KAT6A,RFX3,RUNX1T1,SMURF2,TNKS,WWC2,XRCC5,ZHX2	rna_Large_Intestine_c2,rna_Large_Intestine_c9,rna_Large_Intestine_c13,rna_Large_Intestine_c3,rna_Large_Intestine_c22
ADAMTS9	cluster_2	No	GO:0050923	BP	regulation of negative chemotaxis	0.0165287	ROBO1,SLIT2	rna_Large_Intestine_c2,rna_Large_Intestine_c9,rna_Large_Intestine_c13,rna_Large_Intestine_c3,rna_Large_Intestine_c22
ADAMTS9	cluster_2	No	GO:0051129	BP	negative regulation of cellular component organization	0.0101569	CAPZA1,LDLRAD4,PHLDB2,SLIT2,TNKS,XRCC5	rna_Large_Intestine_c2,rna_Large_Intestine_c9,rna_Large_Intestine_c13,rna_Large_Intestine_c3,rna_Large_Intestine_c22
ADAMTS9	cluster_2	No	GO:0051253	BP	negative regulation of RNA metabolic process	0.003043	HDAC9,KAT6A,RFX3,RUNX1T1,SMURF2,WWC2,XRCC5,ZHX2	rna_Large_Intestine_c2,rna_Large_Intestine_c9,rna_Large_Intestine_c13,rna_Large_Intestine_c3,rna_Large_Intestine_c22
ADAMTS9	cluster_2	No	GO:0051338	BP	regulation of transferase activity	0.0332969	INSR,ROBO1,RPTOR,TAB2,TNKS,XRCC5	rna_Large_Intestine_c2,rna_Large_Intestine_c9,rna_Large_Intestine_c13,rna_Large_Intestine_c3,rna_Large_Intestine_c22
ADAMTS9	cluster_2	No	GO:0051347	BP	positive regulation of transferase activity	0.00798905	INSR,ROBO1,RPTOR,TAB2,TNKS,XRCC5	rna_Large_Intestine_c2,rna_Large_Intestine_c9,rna_Large_Intestine_c13,rna_Large_Intestine_c3,rna_Large_Intestine_c22
ADAMTS9	cluster_2	No	GO:0051494	BP	negative regulation of cytoskeleton organization	0.0395459	CAPZA1,PHLDB2,SLIT2	rna_Large_Intestine_c2,rna_Large_Intestine_c9,rna_Large_Intestine_c13,rna_Large_Intestine_c3,rna_Large_Intestine_c22
ADAMTS9	cluster_2	No	GO:0070099	BP	regulation of chemokine-mediated signaling pathway	0.0165287	ROBO1,SLIT2	rna_Large_Intestine_c2,rna_Large_Intestine_c9,rna_Large_Intestine_c13,rna_Large_Intestine_c3,rna_Large_Intestine_c22
ADAMTS9	cluster_2	No	GO:0070100	BP	negative regulation of chemokine-mediated signaling pathway	0.0165287	ROBO1,SLIT2	rna_Large_Intestine_c2,rna_Large_Intestine_c9,rna_Large_Intestine_c13,rna_Large_Intestine_c3,rna_Large_Intestine_c22
ADAMTS9	cluster_2	No	GO:0070198	BP	protein localization to chromosome, telomeric region	0.0165287	TNKS,XRCC5	rna_Large_Intestine_c2,rna_Large_Intestine_c9,rna_Large_Intestine_c13,rna_Large_Intestine_c3,rna_Large_Intestine_c22
ADAMTS9	cluster_2	No	GO:0070647	BP	protein modification by small protein conjugation or removal	0.00141891	PJA2,RNF38,SENP7,SMURF2,TNKS,ZNRF1	rna_Large_Intestine_c2,rna_Large_Intestine_c9,rna_Large_Intestine_c13,rna_Large_Intestine_c3,rna_Large_Intestine_c22
ADAMTS9	cluster_2	No	GO:0071417	BP	cellular response to organonitrogen compound	0.00230067	ABCC1,HDAC9,INSR,RPTOR,SLIT2	rna_Large_Intestine_c2,rna_Large_Intestine_c9,rna_Large_Intestine_c13,rna_Large_Intestine_c3,rna_Large_Intestine_c22
ADAMTS9	cluster_2	No	GO:0071495	BP	cellular response to endogenous stimulus	0.0340048	ABCC1,HDAC9,INSR,RPTOR,SLIT2	rna_Large_Intestine_c2,rna_Large_Intestine_c9,rna_Large_Intestine_c13,rna_Large_Intestine_c3,rna_Large_Intestine_c22
ADAMTS9	cluster_2	No	GO:0071716	BP	leukotriene transport	0.00702891	ABCC1,ABCC4	rna_Large_Intestine_c2,rna_Large_Intestine_c9,rna_Large_Intestine_c13,rna_Large_Intestine_c3,rna_Large_Intestine_c22
ADAMTS9	cluster_2	No	GO:0090287	BP	regulation of cellular response to growth factor stimulus	0.0361027	LDLRAD4,ROBO1,SLIT2,SMURF2	rna_Large_Intestine_c2,rna_Large_Intestine_c9,rna_Large_Intestine_c13,rna_Large_Intestine_c3,rna_Large_Intestine_c22
ADAMTS9	cluster_2	No	GO:0150104	BP	transport across blood-brain barrier	0.0395459	ABCC1,ABCC4,INSR	rna_Large_Intestine_c2,rna_Large_Intestine_c9,rna_Large_Intestine_c13,rna_Large_Intestine_c3,rna_Large_Intestine_c22
ADAMTS9	cluster_2	No	GO:1901653	BP	cellular response to peptide	0.047811	ABCC1,HDAC9,INSR	rna_Large_Intestine_c2,rna_Large_Intestine_c9,rna_Large_Intestine_c13,rna_Large_Intestine_c3,rna_Large_Intestine_c22
ADAMTS9	cluster_2	No	GO:1901698	BP	response to nitrogen compound	0.0243231	ABCC1,HDAC9,INSR,RPTOR,SLIT2	rna_Large_Intestine_c2,rna_Large_Intestine_c9,rna_Large_Intestine_c13,rna_Large_Intestine_c3,rna_Large_Intestine_c22
ADAMTS9	cluster_2	No	GO:1901699	BP	cellular response to nitrogen compound	0.00390421	ABCC1,HDAC9,INSR,RPTOR,SLIT2	rna_Large_Intestine_c2,rna_Large_Intestine_c9,rna_Large_Intestine_c13,rna_Large_Intestine_c3,rna_Large_Intestine_c22
ADAMTS9	cluster_2	No	GO:1901700	BP	response to oxygen-containing compound	0.0165287	ABCC1,DAPK1,HDAC9,INSR,RPTOR,SLIT2,TAB2	rna_Large_Intestine_c2,rna_Large_Intestine_c9,rna_Large_Intestine_c13,rna_Large_Intestine_c3,rna_Large_Intestine_c22
[truncated: 84,761 more rows]
