# Supplementary material for: A unified analysis of atlas single-cell data
Source: HighWire-hosted journal article supplement (doi:10.1101/gr.279631.124), 2025-02-18
Supplement: Supplemental_Table_S5.xlsx [file Supplemental_Table_S5.xlsx]

## Sheet: Table S5
Table S5: TFs in embedding components.
component #	top 3 tissues	TF	p fdr bh	fold change
component_11	Large_Intestine	REST	0.000100794	2.73573
component_34	Kidney	MZF1	0.000489789	3.68777
component_34	Kidney	PARP1	0.000909472	3.37504
component_40	Kidney	RFX1	0.000885149	3.82844
component_40	Kidney	VHL	0.000260185	3.67324
component_40	Kidney	TWIST1	0.000260185	2.69945
component_40	Kidney	TWIST2	0.000683229	2.68327
component_42	Kidney	VDR	0.000962136	2.88966
component_42	Kidney	TWIST1	0.000277903	2.74538
component_42	Kidney	TWIST2	0.000752492	2.72892
component_60	Kidney	NFIC	0.000276712	3.83071
component_80	Kidney	SNAI1	0.000829601	4.69856
component_80	Kidney	FLI1	3.94354e-05	3.53462
component_80	Kidney	TWIST2	3.94354e-05	3.11961
component_80	Kidney	ERG	3.94354e-05	2.9527
component_80	Kidney	TWIST1	0.000335404	2.74612
component_80	Kidney	YY1	0.000556285	2.31696
component_80	Kidney	SP3	0.000370513	2.10421
component_80	Kidney	ETS1	0.000414801	2.05852
component_81	Kidney	REST	4.80721e-05	3.26481
component_84	Kidney	PPARG	0.00095248	2.40425
component_88	Spleen	LMO3	2.66305e-07	90.8943
component_88	Spleen	HNRNPR	2.66305e-07	90.8943
component_88	Spleen	HES6	2.66305e-07	90.8943
component_88	Spleen	NHLH2	2.66305e-07	90.8943
component_88	Spleen	EPAS1	4.19178e-06	5.01871
component_88	Spleen	MAZ	0.000517427	4.99763
component_88	Spleen	HNF4A	0.000392548	3.10027
component_88	Spleen	SIRT1	0.000881598	2.73366
component_100	Kidney	PITX1	0.000326842	9.15809
component_100	Kidney	NKX3-1	0.000581958	8.12964
component_100	Kidney	RUNX2	3.07756e-05	5.10149
component_101	Lymph_Node,Thymus	HOPX	1.4911e-05	117.519
component_104	Kidney	NR5A1	1.3499e-05	12.6648
component_104	Kidney	ZFP36	0.000100342	9.49859
component_104	Kidney	NFKBIA	0.00080572	3.51014
component_112	Kidney	NR2F6	0.000643239	8.60784
component_112	Kidney	NR2F1	2.87998e-05	7.97746
component_112	Kidney	IKBKB	0.000643239	5.23026
component_129	Large_Intestine	HDAC4	0.000315745	8.58389
component_129	Large_Intestine	ATRX	0.000851702	7.04482
component_129	Large_Intestine	REST	0.000315745	3.184
component_132	Spleen	RFXANK	5.75502e-05	5.80477
component_132	Spleen	RFXAP	5.75502e-05	5.80477
component_132	Spleen	ATF5	0.000174517	5.10071
component_139	Kidney	NKX3-1	0.00048439	9.3687
component_148	Kidney	KLF9	0.000592719	9.57388
component_148	Kidney	SSX2	0.000654258	9.28278
component_148	Kidney	DLX5	0.000654258	9.25153
component_148	Kidney	KLF11	0.000654258	9.22048
component_148	Kidney	ETV6	0.0006726	9.09836
component_148	Kidney	ONECUT2	0.000818674	8.66783
component_148	Kidney	FOXF2	1.1759e-06	8.64058
component_148	Kidney	EZH2	1.1759e-06	8.60001
component_148	Kidney	MYBL2	0.000857616	8.55982
component_148	Kidney	PAX6	4.78889e-06	7.37639
component_148	Kidney	HOXB7	1.93185e-08	7.05746
component_148	Kidney	NCOA3	0.000162728	6.92698
component_148	Kidney	LMX1B	0.000404277	6.87355
component_148	Kidney	SMAD4	7.48734e-10	6.15387
component_148	Kidney	HDAC7	3.41977e-05	5.90269
component_148	Kidney	RELB	0.000654258	5.40178
component_148	Kidney	ATF2	1.29288e-05	4.77654
component_148	Kidney	TAL1	0.000233246	4.7456
component_148	Kidney	ESR1	6.26155e-11	4.50044
component_148	Kidney	NR3C1	8.36198e-06	4.4199
component_148	Kidney	HOXD3	0.000404277	4.41753
component_148	Kidney	RFX1	0.000475826	4.30001
component_148	Kidney	PARP1	5.64213e-05	4.1703
component_148	Kidney	CIITA	1.17035e-06	3.99376
component_148	Kidney	RB1	0.000776837	3.95923
component_148	Kidney	RFX5	0.000928235	3.85643
component_148	Kidney	MITF	0.000303078	3.75369
component_148	Kidney	CTCF	0.000303736	3.74143
component_148	Kidney	TWIST2	1.17035e-06	3.73134
component_148	Kidney	HDAC2	0.000404277	3.62303
component_148	Kidney	TFAP2A	1.66426e-08	3.56151
component_148	Kidney	IRF1	0.000162728	3.46495
component_148	Kidney	FLI1	0.000186077	3.41471
component_148	Kidney	TWIST1	7.99e-06	3.28461
component_148	Kidney	TP53	8.14556e-11	3.25049
component_148	Kidney	JUND	2.31706e-05	3.2345
component_148	Kidney	CREB1	2.71294e-06	3.16848
component_148	Kidney	STAT6	0.000482217	3.09775
component_148	Kidney	ERG	2.04313e-05	3.09025
component_148	Kidney	AR	4.29785e-06	2.84597
component_148	Kidney	SRF	0.000760685	2.83238
component_148	Kidney	STAT3	1.66426e-08	2.81391
component_148	Kidney	ETS1	2.74153e-08	2.76207
component_148	Kidney	JUN	5.48283e-05	2.11159
component_148	Kidney	SP3	0.000955111	2.03283
component_148	Kidney	NFKB1	0.000265815	1.64584
component_148	Kidney	RELA	0.000948534	1.57425
component_148	Kidney	SP1	0.000654258	1.53489
component_152	Heart,Large_Intestine,Lung	FOXO3	0.000226973	7.42264
component_152	Heart,Large_Intestine,Lung	IRF9	0.000238026	6.84411
component_152	Heart,Large_Intestine,Lung	TP63	0.000238026	6.82404
component_152	Heart,Large_Intestine,Lung	PAX8	0.000278262	6.46388
component_152	Heart,Large_Intestine,Lung	SMAD3	6.5969e-05	5.31683
component_152	Heart,Large_Intestine,Lung	CLOCK	0.000509352	4.83114
component_152	Heart,Large_Intestine,Lung	MYC	6.5969e-05	3.46176
component_152	Heart,Large_Intestine,Lung	TWIST2	0.000238026	3.20865
component_152	Heart,Large_Intestine,Lung	HIF1A	0.000257768	2.89644
component_152	Heart,Large_Intestine,Lung	AR	0.000278262	2.552
component_157	Large_Intestine	ATOH1	6.02411e-05	67.2706
component_157	Large_Intestine	ZNF148	0.000536711	13.8498
component_157	Large_Intestine	SPDEF	9.41841e-05	5.24882
component_157	Large_Intestine	RUNX2	0.000875908	4.74055
component_157	Large_Intestine	REST	1.08271e-05	3.84843
component_159	Lung,Heart,Kidney	FOXD3	3.01753e-05	9.02041
component_159	Lung,Heart,Kidney	DNMT3A	9.05023e-05	8.2288
component_159	Lung,Heart,Kidney	CTNNB1	0.000426403	6.68735
component_159	Lung,Heart,Kidney	HNF1A	8.91782e-05	4.8542
component_171	Lung	MAL	2.83041e-06	9.88901
component_171	Lung	HOXC6	0.000670174	7.0647
component_171	Lung	SMAD3	2.96331e-05	5.66754
component_171	Lung	TFAP2A	0.000193174	2.89364
component_171	Lung	STAT3	0.000135533	2.39084
component_173	Spleen	PPARD	0.000388232	5.83124
component_173	Spleen	RUNX3	0.000192819	4.30822
component_178	Kidney	IKBKB	0.000204764	6.63588
component_182	Lung	NR4A2	0.000428925	13.5908
component_182	Lung	NEAT1	0.000428925	13.5908
component_182	Lung	ZNF300	0.000428925	13.5908
component_182	Lung	OLIG2	0.000810056	11.376
component_182	Lung	ATRX	6.13224e-07	11.355
component_182	Lung	CEBPG	0.000810056	11.21
component_182	Lung	KLF1	0.000810056	11.21
component_182	Lung	DDIT3	0.000115269	7.34177
component_182	Lung	POU2F1	0.000428925	3.17874
component_182	Lung	GATA1	0.000428925	2.75683
component_189	Heart,Lung,Kidney	DDX5	7.74922e-08	12.8401
component_189	Heart,Lung,Kidney	KLF9	0.000351955	11.1624
component_189	Heart,Lung,Kidney	PLAG1	0.000351955	11.0852
component_189	Heart,Lung,Kidney	SUZ12	0.000351955	11.0852
component_189	Heart,Lung,Kidney	PLAGL2	4.20261e-05	11.0374
component_189	Heart,Lung,Kidney	APEX1	0.000359492	10.9713
component_189	Heart,Lung,Kidney	HOXA5	3.69969e-07	10.7684
component_189	Heart,Lung,Kidney	ONECUT2	0.000514508	10.106
component_189	Heart,Lung,Kidney	ING1	0.000532812	9.9801
component_189	Heart,Lung,Kidney	NR4A3	0.000599709	9.50626
component_189	Heart,Lung,Kidney	SOX4	0.000599709	9.45018
component_189	Heart,Lung,Kidney	PAX2	0.000599709	9.45018
component_189	Heart,Lung,Kidney	PREB	0.000599709	9.45018
component_189	Heart,Lung,Kidney	AES	3.94051e-06	9.24927
component_189	Heart,Lung,Kidney	ZBTB7A	0.000599709	9.15317
component_189	Heart,Lung,Kidney	HINFP	0.000599709	9.10117
component_189	Heart,Lung,Kidney	DDB2	0.000599709	9.07538
component_189	Heart,Lung,Kidney	PAWR	0.000599709	9.07538
component_189	Heart,Lung,Kidney	ATM	0.000599709	9.07538
component_189	Heart,Lung,Kidney	PER1	0.000599709	9.07538
component_189	Heart,Lung,Kidney	BACH2	0.000599709	9.07538
component_189	Heart,Lung,Kidney	SMAD2	0.000599709	9.07538
component_189	Heart,Lung,Kidney	SIM2	0.000599709	9.07538
component_189	Heart,Lung,Kidney	ERCC2	0.000599709	9.07538
component_189	Heart,Lung,Kidney	NAB2	0.000624892	8.9737
component_189	Heart,Lung,Kidney	MSX2	5.04244e-06	8.88546
component_189	Heart,Lung,Kidney	MAML1	0.000762899	8.58877
component_189	Heart,Lung,Kidney	NKX2-3	0.000762899	8.58877
component_189	Heart,Lung,Kidney	FOXM1	5.33215e-05	8.52024
component_189	Heart,Lung,Kidney	KHDRBS1	0.000804506	8.47516
component_189	Heart,Lung,Kidney	TP63	0.000201728	7.04606
component_189	Heart,Lung,Kidney	CTCF	1.67099e-10	6.97954
component_189	Heart,Lung,Kidney	CLOCK	1.11999e-06	6.92822
component_189	Heart,Lung,Kidney	ZBTB16	4.72168e-05	6.68939
component_189	Heart,Lung,Kidney	PPARD	4.1948e-05	6.25705
component_189	Heart,Lung,Kidney	WWP1	0.000599709	6.13718
component_189	Heart,Lung,Kidney	SNAI2	0.000359492	6.11376
component_189	Heart,Lung,Kidney	EGR2	0.000262707	5.79105
component_189	Heart,Lung,Kidney	RB1	5.91383e-06	5.77019
component_189	Heart,Lung,Kidney	ATF5	0.000105827	5.43445
component_189	Heart,Lung,Kidney	GLI1	0.000226603	4.94003
component_189	Heart,Lung,Kidney	NR1I2	0.000226603	4.90975
component_189	Heart,Lung,Kidney	ATF4	0.000351955	4.53448
component_189	Heart,Lung,Kidney	SMAD4	0.000233105	4.18538
component_189	Heart,Lung,Kidney	FOSL1	0.000599709	4.13636
component_189	Heart,Lung,Kidney	PAX5	0.000226603	3.96486
component_189	Heart,Lung,Kidney	FOXA1	0.000262707	3.86723
component_189	Heart,Lung,Kidney	IRF1	0.00012352	3.81543
component_189	Heart,Lung,Kidney	ESR1	4.89894e-05	3.26175
component_189	Heart,Lung,Kidney	HIF1A	4.72168e-05	3.19005
component_189	Heart,Lung,Kidney	E2F1	0.000843601	2.19817
component_189	Heart,Lung,Kidney	SP1	2.51442e-06	1.82646
component_189	Heart,Lung,Kidney	RELA	0.000514508	1.67683
component_201	Kidney	NKX3-1	0.000192269	12.2617
component_208	Kidney,Lung,Heart	TRPS1	0.000167634	22.7103
component_208	Kidney,Lung,Heart	SRCAP	0.000167634	22.7103
component_208	Kidney,Lung,Heart	BTG2	0.000167634	22.7103
component_208	Kidney,Lung,Heart	FOXP1	0.000167634	22.7103
component_208	Kidney,Lung,Heart	SIN3A	0.000167634	22.7103
component_208	Kidney,Lung,Heart	AATF	0.000167634	22.7103
component_208	Kidney,Lung,Heart	FUS	0.000167634	22.7103
component_208	Kidney,Lung,Heart	RREB1	0.000167634	22.7103
component_208	Kidney,Lung,Heart	RUNX2	0.000391071	5.44894
component_210	Large_Intestine	DDX5	2.21288e-06	11.9672
component_210	Large_Intestine	HOXA5	6.45176e-06	10.0364
component_210	Large_Intestine	NCOR1	8.42831e-06	9.41899
component_210	Large_Intestine	MBD1	8.42831e-06	9.37463
component_210	Large_Intestine	UHRF1	1.48142e-05	8.71773
component_210	Large_Intestine	TFAP2B	2.08969e-05	8.23675
component_210	Large_Intestine	AES	0.000327556	7.52333
component_210	Large_Intestine	CDX1	2.21288e-06	6.89036
component_210	Large_Intestine	KLF2	0.000103197	6.71726
component_210	Large_Intestine	NFYC	0.000183364	6.20108
component_210	Large_Intestine	NFYA	0.000183364	6.20108
component_210	Large_Intestine	LMO2	0.000240033	5.97164
component_210	Large_Intestine	PPARD	0.000279165	5.83168
component_210	Large_Intestine	CTCF	2.53338e-06	5.5293
component_210	Large_Intestine	MECP2	0.0004339	5.47355
component_210	Large_Intestine	MYCN	0.000487078	5.37018
component_210	Large_Intestine	HSF1	2.21288e-06	5.07429
component_210	Large_Intestine	IRF3	0.000724409	5.06931
component_210	Large_Intestine	NFYB	0.000911317	4.90685
component_210	Large_Intestine	XBP1	2.73714e-05	4.87879
component_210	Large_Intestine	CREBBP	0.000983417	4.83926
component_210	Large_Intestine	PPARA	1.73835e-05	3.61023
component_210	Large_Intestine	HIF1A	8.42831e-06	3.56782
component_210	Large_Intestine	AR	2.66596e-06	3.27453
component_210	Large_Intestine	EGR1	4.77179e-05	2.62094
component_210	Large_Intestine	E2F1	0.000618088	2.37653
component_210	Large_Intestine	SP1	7.28692e-07	1.96022
component_231	Lung,Heart,Kidney	NFKB2	0.000229433	9.85008
component_231	Lung,Heart,Kidney	MYC	0.000374425	3.73697
component_233	Kidney,Lung,Heart	MED1	0.000947863	10.4796
component_233	Kidney,Lung,Heart	SREBF2	0.000997224	7.87339
component_236	Spleen	ATF6	0.000483716	28.6818
component_239	Kidney	KAT5	0.000117921	18.0973
component_239	Kidney	NR5A2	3.64994e-08	14.617
component_239	Kidney	NR1H3	0.000484413	13.2293
component_239	Kidney	KLF13	0.000484413	13.1049
component_239	Kidney	MYBL2	0.000484413	13.0233
component_239	Kidney	HAND2	0.000701162	11.9442
component_239	Kidney	RXRA	4.5174e-05	6.72101
component_239	Kidney	SREBF1	2.02167e-05	5.27088
component_239	Kidney	SPI1	1.12063e-07	3.75793
component_240	Lung,Kidney,Heart	IRF7	3.39486e-05	11.8087
component_240	Lung,Kidney,Heart	CREM	3.39486e-05	6.07364
component_240	Lung,Kidney,Heart	STAT4	0.000328795	5.98188
component_240	Lung,Kidney,Heart	RELA	0.000148133	1.92916
component_240	Lung,Kidney,Heart	NFKB1	0.000148133	1.92198
component_241	Kidney	TP53	0.000954752	2.73494
component_245	Kidney	HNF4G	0.000186037	17.3852
component_245	Kidney	KLF13	0.000673374	13.3523
component_245	Kidney	EIF2AK2	0.000804613	12.5276
component_245	Kidney	TCF3	2.5841e-09	10.7764
component_245	Kidney	KLF2	2.03505e-06	9.58242
component_245	Kidney	STAT4	0.000956565	5.5202
component_245	Kidney	GLI1	0.000956565	5.47338
component_246	Heart,Liver,Lung	CTCF	4.38798e-05	5.80608
component_248	Lung	GLI1	0.000109183	6.6001
component_248	Lung	CEBPA	2.00771e-05	3.31849
component_250	Lung	TP63	2.01828e-07	12.5654
component_252	Lung,Heart,Kidney	ZNF24	0.000430656	14.4469
component_252	Lung,Heart,Kidney	POU3F2	0.000475138	12.6044
component_252	Lung,Heart,Kidney	HIF3A	0.000475138	12.568
component_252	Lung,Heart,Kidney	PCGF2	0.000475138	12.4243
component_252	Lung,Heart,Kidney	GFI1B	0.000475138	12.3889
component_252	Lung,Heart,Kidney	HOXD1	0.000475138	12.3537
component_252	Lung,Heart,Kidney	ISL1	0.00055918	11.8166
component_252	Lung,Heart,Kidney	HDAC7	1.34428e-06	9.3416
component_252	Lung,Heart,Kidney	SMAD4	1.20487e-06	6.49274
component_252	Lung,Heart,Kidney	SRF	1.21466e-08	5.66213
component_252	Lung,Heart,Kidney	MTA1	0.000954147	5.25945
component_254	Heart,Lung,Large_Intestine	GFI1	0.000554199	27.9295
component_258	Kidney	HOXA11	0.000151708	18.0193
component_258	Kidney	GZF1	0.000151708	18.0193
component_258	Kidney	DBP	3.92508e-09	17.7715
component_258	Kidney	FOXD3	2.72109e-05	11.7172
component_259	Kidney	EZH2	0.000184064	9.49719
component_259	Kidney	HOXA5	0.000799188	8.92456
component_259	Kidney	SMAD4	0.000377506	5.0969
component_259	Kidney	MITF	0.00042678	4.97435
component_259	Kidney	HIF1A	5.71427e-05	3.77689
component_259	Kidney	TP53	5.50746e-06	3.14935
component_259	Kidney	STAT3	1.38507e-05	2.92468
component_259	Kidney	RELA	1.41636e-06	2.18919
component_259	Kidney	NFKB1	1.41636e-06	2.18105
component_259	Kidney	SP1	2.45009e-06	2.01829
component_260	Heart,Lung,Liver	VHL	0.000479933	5.48945
component_260	Heart,Lung,Liver	EGR1	0.000268986	2.92505
component_260	Heart,Lung,Liver	NFKB1	0.000268986	1.96445
component_261	Heart,Lung,Large_Intestine	SHOX	0.000185834	114.249
component_261	Heart,Lung,Large_Intestine	SHOX2	0.000185834	114.249
component_261	Heart,Lung,Large_Intestine	HMGB2	0.000405909	17.0776
component_261	Heart,Lung,Large_Intestine	IRF5	0.000405909	17.0776
component_261	Heart,Lung,Large_Intestine	LRRFIP1	0.000405909	17.0776
component_261	Heart,Lung,Large_Intestine	HDAC11	0.000441387	16.5578
component_261	Heart,Lung,Large_Intestine	TCFL5	0.000185834	15.5972
component_261	Heart,Lung,Large_Intestine	BATF	0.000185834	15.5972
component_261	Heart,Lung,Large_Intestine	KLF13	0.000205713	14.3259
component_261	Heart,Lung,Large_Intestine	CEBPG	0.000903969	13.8989
component_261	Heart,Lung,Large_Intestine	KLF1	0.000903969	13.8989
component_261	Heart,Lung,Large_Intestine	NFAT5	0.000185834	8.1899
component_261	Heart,Lung,Large_Intestine	GATA2	8.72027e-07	7.44779
component_261	Heart,Lung,Large_Intestine	STAT4	0.000405909	5.92271
component_261	Heart,Lung,Large_Intestine	SPI1	5.91627e-11	4.62157
component_261	Heart,Lung,Large_Intestine	CEBPB	0.000185834	3.29995
component_261	Heart,Lung,Large_Intestine	RELA	0.000205713	1.90714
component_261	Heart,Lung,Large_Intestine	NFKB1	0.000205713	1.90005
component_262	Lung,Heart	RFXANK	0.000748944	6.68249
component_262	Lung,Heart	RFXAP	0.000748944	6.68249
component_262	Lung,Heart	RFX5	0.000977223	5.39809
component_262	Lung,Heart	RARA	0.000110818	5.10098
component_262	Lung,Heart	SPI1	1.39439e-06	3.75992
component_262	Lung,Heart	MYB	0.000848841	3.59453
component_262	Lung,Heart	ETS2	0.000155322	3.57614
component_262	Lung,Heart	CEBPA	0.000155322	3.08481
component_262	Lung,Heart	ETS1	0.000960304	2.50533
component_262	Lung,Heart	RELA	0.000155322	1.95874
component_262	Lung,Heart	NFKB1	0.000848841	1.85388
component_264	Lung,Heart,Kidney	SSX2	5.50498e-05	15.629
component_264	Lung,Heart,Kidney	KLF11	5.50498e-05	15.5241
component_264	Lung,Heart,Kidney	ZNF24	5.51691e-05	15.3694
component_264	Lung,Heart,Kidney	ETV6	5.51691e-05	15.3185
component_264	Lung,Heart,Kidney	ELF2	6.83759e-05	14.5478
component_264	Lung,Heart,Kidney	ING1	6.83759e-05	14.4118
component_264	Lung,Heart,Kidney	MYBL2	6.83759e-05	14.4118
component_264	Lung,Heart,Kidney	NR4A3	8.24261e-05	13.7276
component_264	Lung,Heart,Kidney	SOX17	8.28722e-05	13.6466
component_264	Lung,Heart,Kidney	POU3F2	8.81528e-05	13.4092
component_264	Lung,Heart,Kidney	HIF3A	8.81528e-05	13.3705
component_264	Lung,Heart,Kidney	MBD2	9.16672e-05	13.2177
component_264	Lung,Heart,Kidney	ARNTL2	0.000638357	11.7535
component_264	Lung,Heart,Kidney	TGIF1	0.000638357	11.7535
component_264	Lung,Heart,Kidney	ASH1L	0.000169894	11.5945
component_264	Lung,Heart,Kidney	NOTCH3	6.78425e-06	10.9625
component_264	Lung,Heart,Kidney	TFDP1	0.000236468	10.7586
component_264	Lung,Heart,Kidney	PKNOX1	0.000295058	10.1898
component_264	Lung,Heart,Kidney	PBX2	0.000295058	10.1898
component_264	Lung,Heart,Kidney	ETV5	1.17668e-05	10.1451
component_264	Lung,Heart,Kidney	NR4A1	1.33058e-06	10.0134
component_264	Lung,Heart,Kidney	LMX1B	0.000638357	8.67952
component_264	Lung,Heart,Kidney	CEBPZ	0.000638357	8.67952
component_264	Lung,Heart,Kidney	MZF1	4.75357e-09	8.63094
component_264	Lung,Heart,Kidney	NCOR1	0.000230009	8.51296
component_264	Lung,Heart,Kidney	TFAP2C	0.000852295	8.15906
component_264	Lung,Heart,Kidney	HTATIP2	0.000875835	8.08774
component_264	Lung,Heart,Kidney	TAL1	2.52385e-06	7.98996
component_264	Lung,Heart,Kidney	HOXB7	2.52385e-06	7.92155
component_264	Lung,Heart,Kidney	PARP1	6.79679e-08	7.46018
component_264	Lung,Heart,Kidney	SMAD4	6.79679e-08	7.33904
component_264	Lung,Heart,Kidney	PPARD	0.000117432	6.77664
component_264	Lung,Heart,Kidney	GATA6	1.17668e-05	6.65638
component_264	Lung,Heart,Kidney	EPAS1	3.42388e-05	6.5041
component_264	Lung,Heart,Kidney	ATF2	2.9135e-05	6.03153
component_264	Lung,Heart,Kidney	NR1H4	2.95812e-05	5.99247
component_264	Lung,Heart,Kidney	ELF1	3.47025e-05	5.8191
component_264	Lung,Heart,Kidney	VHL	5.30412e-05	5.55698
component_264	Lung,Heart,Kidney	NFIC	6.71489e-05	5.32664
component_264	Lung,Heart,Kidney	YBX1	0.000120364	5.31412
component_264	Lung,Heart,Kidney	CEBPD	8.00642e-05	5.16604
component_264	Lung,Heart,Kidney	ESR2	0.000169857	5.09084
component_264	Lung,Heart,Kidney	MYB	6.7575e-07	4.72887
component_264	Lung,Heart,Kidney	TWIST1	1.33058e-06	4.46666
component_264	Lung,Heart,Kidney	SREBF1	0.00026736	4.37464
component_264	Lung,Heart,Kidney	SRF	2.51486e-05	4.26677
component_264	Lung,Heart,Kidney	ERG	2.52385e-06	4.20235
component_264	Lung,Heart,Kidney	FLI1	0.000230009	4.1522
component_264	Lung,Heart,Kidney	SIRT1	3.42388e-05	4.10637
component_264	Lung,Heart,Kidney	RUNX3	0.000852295	4.07953
component_264	Lung,Heart,Kidney	ETS2	1.17668e-05	3.76375
component_264	Lung,Heart,Kidney	KLF4	0.000135587	3.68364
component_264	Lung,Heart,Kidney	TWIST2	0.000257234	3.6244
component_264	Lung,Heart,Kidney	TP53	7.45706e-08	3.51079
component_264	Lung,Heart,Kidney	POU2F1	0.00067867	3.26431
component_264	Lung,Heart,Kidney	CREB1	0.000230009	3.20077
component_264	Lung,Heart,Kidney	STAT3	6.7575e-07	3.15844
component_264	Lung,Heart,Kidney	SP3	2.52385e-06	3.04229
component_264	Lung,Heart,Kidney	TFAP2A	0.000455296	2.99818
component_264	Lung,Heart,Kidney	SP1	7.45706e-08	2.13132
component_264	Lung,Heart,Kidney	RELA	8.20377e-05	1.89788
component_264	Lung,Heart,Kidney	NFKB1	0.0004445	1.79302
component_268	Heart,Pancreas,Lung	NRF1	7.17132e-06	31.8542
component_274	Kidney	NR2F6	7.03077e-06	17.3458
component_274	Kidney	NR3C2	8.2278e-06	16.1162
component_274	Kidney	NR2F1	1.24546e-08	16.0755
component_275	Kidney,Large_Intestine	ATOH1	0.000957221	85.2576
component_275	Kidney,Large_Intestine	SUGP1	0.000957221	20.0944
component_276	Lung	NKX2-1	5.62484e-05	22.4695
component_276	Lung	MYBBP1A	5.62484e-05	22.4695
component_276	Lung	MBD2	0.000600085	13.6743
component_276	Lung	GFI1B	0.000600085	13.6353
component_276	Lung	ISL1	0.000653576	13.0054
component_276	Lung	RARG	0.000660626	12.3351
component_276	Lung	IFI16	0.000660626	12.3351
component_276	Lung	TFDP1	0.000854606	11.1302
component_276	Lung	RARA	6.11154e-07	6.34748
component_276	Lung	CLOCK	0.000854606	6.21021
component_276	Lung	TWIST2	0.000854606	3.74961
component_285	Kidney,Heart,Pancreas	NRF1	0.0001703	28.4376
component_285	Kidney,Heart,Pancreas	MED1	0.000180085	12.9458
component_287	Kidney	KDM2A	0.000220928	21.4644
component_289	Heart,Spleen,Liver	SUGP1	0.000969401	17.0006
component_289	Heart,Spleen,Liver	IKBKB	8.55543e-07	10.2172
component_289	Heart,Spleen,Liver	FOXD3	0.000104883	10.1739
component_289	Heart,Spleen,Liver	AHR	4.143e-05	9.84243
component_289	Heart,Spleen,Liver	NFKBIA	1.54185e-13	9.82495
component_289	Heart,Spleen,Liver	ELF4	0.000140708	9.54732
component_289	Heart,Spleen,Liver	DDIT3	7.61097e-05	8.77735
component_289	Heart,Spleen,Liver	NFAT5	0.000122722	8.04328
component_289	Heart,Spleen,Liver	NR4A1	0.0001299	7.94832
component_289	Heart,Spleen,Liver	KLF10	0.000196365	7.38993
component_289	Heart,Spleen,Liver	SMAD3	1.72398e-05	7.05012
component_289	Heart,Spleen,Liver	FOXO1	0.000288522	6.92616
component_289	Heart,Spleen,Liver	ING4	0.000866409	6.8897
component_289	Heart,Spleen,Liver	SP2	0.000866409	6.88166
component_289	Heart,Spleen,Liver	HSF1	3.70728e-08	6.77438
component_289	Heart,Spleen,Liver	HMGA1	1.1348e-05	6.71879
component_289	Heart,Spleen,Liver	NFIL3	1.20901e-05	6.63928
component_289	Heart,Spleen,Liver	CDX1	7.61097e-05	6.47329
component_289	Heart,Spleen,Liver	HOXA1	0.000473762	6.43001
component_289	Heart,Spleen,Liver	REL	8.55543e-07	6.05416
component_289	Heart,Spleen,Liver	GATA2	5.41336e-05	6.03443
component_289	Heart,Spleen,Liver	BRCA1	2.63798e-05	6.00377
component_289	Heart,Spleen,Liver	XBP1	1.28304e-05	5.95853
component_289	Heart,Spleen,Liver	CEBPD	4.22699e-05	5.63838
component_289	Heart,Spleen,Liver	RARA	1.97038e-05	5.2084
component_289	Heart,Spleen,Liver	SIRT1	8.55543e-07	5.0091
component_289	Heart,Spleen,Liver	NR3C1	0.000224134	4.96344
component_289	Heart,Spleen,Liver	SREBF1	0.000147143	4.77463
component_289	Heart,Spleen,Liver	HDAC1	1.92077e-08	4.75233
component_289	Heart,Spleen,Liver	PPARA	1.2113e-06	4.62505
component_289	Heart,Spleen,Liver	IRF1	0.000110656	4.59851
component_289	Heart,Spleen,Liver	ETS2	3.31567e-07	4.4991
component_289	Heart,Spleen,Liver	PPARG	3.31224e-08	4.27172
component_289	Heart,Spleen,Liver	CEBPB	5.77821e-07	4.16684
component_289	Heart,Spleen,Liver	ETV4	0.000583105	4.07355
component_289	Heart,Spleen,Liver	RELA	2.72204e-28	3.82139
component_289	Heart,Spleen,Liver	NFKB1	2.96969e-27	3.73601
component_289	Heart,Spleen,Liver	ERG	8.71529e-05	3.71295
component_289	Heart,Spleen,Liver	RUNX1	0.000143198	3.69699
component_289	Heart,Spleen,Liver	GATA3	0.00028771	3.45774
component_289	Heart,Spleen,Liver	STAT1	1.27156e-06	3.34718
component_289	Heart,Spleen,Liver	SPI1	2.71502e-05	3.26229
component_289	Heart,Spleen,Liver	EGR1	3.79586e-06	3.23176
component_289	Heart,Spleen,Liver	YY1	7.61097e-05	3.19915
component_289	Heart,Spleen,Liver	STAT3	1.62544e-06	3.14306
component_289	Heart,Spleen,Liver	CEBPA	5.17935e-05	3.10477
component_289	Heart,Spleen,Liver	JUN	1.72398e-05	2.66767
component_289	Heart,Spleen,Liver	SP1	4.22699e-05	1.89003
component_291	Kidney	SNAI1	0.000280986	8.40563
component_291	Kidney	AR	9.27358e-06	3.87514
component_291	Kidney	TP53	1.15598e-05	3.29356
component_293	Thymus,Lung,Spleen	SUGP1	0.000979531	17.2431
component_293	Thymus,Lung,Spleen	IRF8	7.83056e-06	12.3254
component_293	Thymus,Lung,Spleen	DEK	1.0452e-05	11.7932
component_293	Thymus,Lung,Spleen	ING4	2.56963e-06	9.98286
component_293	Thymus,Lung,Spleen	RFXANK	2.07449e-07	9.8865
component_293	Thymus,Lung,Spleen	RFXAP	2.07449e-07	9.8865
component_293	Thymus,Lung,Spleen	SMAD7	5.9762e-05	9.16547
component_293	Thymus,Lung,Spleen	HSF1	5.10437e-10	7.63448
component_293	Thymus,Lung,Spleen	XBP1	5.43481e-08	7.43821
component_293	Thymus,Lung,Spleen	NFKBIA	2.41329e-08	7.36553
component_293	Thymus,Lung,Spleen	RFX5	4.26465e-06	7.18766
component_293	Thymus,Lung,Spleen	SP2	0.000848276	6.97984
component_293	Thymus,Lung,Spleen	GATA4	4.40059e-05	6.97902
component_293	Thymus,Lung,Spleen	NFIL3	7.7104e-06	6.734
component_293	Thymus,Lung,Spleen	GLI1	6.39621e-05	6.58084
component_293	Thymus,Lung,Spleen	HOXA1	0.00047232	6.52175
component_293	Thymus,Lung,Spleen	RB1	0.000107875	6.14938
component_293	Thymus,Lung,Spleen	SPI1	1.08416e-16	5.89835
component_293	Thymus,Lung,Spleen	REL	2.56963e-06	5.75675
component_293	Thymus,Lung,Spleen	ATF1	5.98684e-05	5.38791
component_293	Thymus,Lung,Spleen	FLI1	2.85855e-05	4.95008
component_293	Thymus,Lung,Spleen	PPARA	1.90812e-07	4.92559
component_293	Thymus,Lung,Spleen	MYC	4.11037e-06	4.57115
component_293	Thymus,Lung,Spleen	STAT1	2.0565e-12	4.56561
component_293	Thymus,Lung,Spleen	RARA	0.000266589	4.52803
component_293	Thymus,Lung,Spleen	ETS2	5.23932e-07	4.36489
component_293	Thymus,Lung,Spleen	CEBPA	3.22719e-09	4.2444
component_293	Thymus,Lung,Spleen	CEBPB	2.36254e-07	4.22629
component_293	Thymus,Lung,Spleen	PPARG	5.43481e-08	4.17792
component_293	Thymus,Lung,Spleen	ETV4	0.000546851	4.13167
component_293	Thymus,Lung,Spleen	HDAC1	5.1194e-06	3.89318
component_293	Thymus,Lung,Spleen	SIRT1	0.000418321	3.74357
component_293	Thymus,Lung,Spleen	ERG	0.00025747	3.54439
component_293	Thymus,Lung,Spleen	CREB1	8.83222e-05	3.54327
component_293	Thymus,Lung,Spleen	NFKB1	2.55938e-23	3.53669
component_293	Thymus,Lung,Spleen	JUN	3.75252e-10	3.52565
component_293	Thymus,Lung,Spleen	TFAP2A	6.18357e-05	3.50338
component_293	Thymus,Lung,Spleen	MYB	0.000792884	3.48992
component_293	Thymus,Lung,Spleen	RELA	1.35736e-22	3.47746
component_293	Thymus,Lung,Spleen	WT1	0.000207248	3.45067
component_293	Thymus,Lung,Spleen	USF1	0.000366899	3.41585
component_293	Thymus,Lung,Spleen	ETS1	1.24466e-07	3.39766
component_293	Thymus,Lung,Spleen	YY1	0.000496031	2.93576
component_293	Thymus,Lung,Spleen	EGR1	0.000349316	2.69254
component_293	Thymus,Lung,Spleen	SP1	7.59558e-07	2.06446
component_294	Lymph_Node	ATF5	9.89466e-09	10.9158
component_294	Lymph_Node	PAX5	0.000133136	5.52169
component_294	Lymph_Node	RARA	0.000110138	5.31026
component_294	Lymph_Node	RUNX1	0.000110138	4.24046
component_296	Kidney	NCOA3	0.000195064	11.6422
component_296	Kidney	SREBF2	0.000266084	10.1422
component_296	Kidney	TFAP2B	0.00028623	9.55463
component_296	Kidney	VHL	0.000195064	6.24064
component_296	Kidney	SATB1	0.000372707	5.25311
component_296	Kidney	MYC	0.00028623	4.12205
component_300	Spleen	ARNTL	1.2242e-05	15.305
component_306	Lymph_Node,Thymus	TWIST1	0.000533619	4.21317
component_308	Kidney	NCOA6	3.01449e-05	22.2281
component_308	Kidney	NR1I3	3.01449e-05	22.2281
component_308	Kidney	SLA2	0.000102101	17.5371
component_308	Kidney	NR2F1	4.88897e-07	15.1555
component_308	Kidney	THRA	0.000334498	13.9212
component_308	Kidney	RUNX2	6.88404e-08	10.5733
component_308	Kidney	PPARGC1A	1.16698e-05	10.0138
component_308	Kidney	HNF4A	9.36072e-06	5.58288
component_309	Lung,Kidney,Large_Intestine	RB1	2.33998e-08	9.74882
component_309	Lung,Kidney,Large_Intestine	SMAD7	0.000159805	9.68688
component_309	Lung,Kidney,Large_Intestine	SPI1	6.63194e-11	5.01753
component_309	Lung,Kidney,Large_Intestine	MYC	3.04176e-05	4.56279
component_309	Lung,Kidney,Large_Intestine	CEBPA	1.72693e-07	4.05174
component_309	Lung,Kidney,Large_Intestine	USF1	0.000802935	3.61017
component_309	Lung,Kidney,Large_Intestine	ETS1	3.30379e-07	3.48213
component_309	Lung,Kidney,Large_Intestine	STAT1	2.78313e-06	3.46434
component_309	Lung,Kidney,Large_Intestine	NFKB1	0.000372123	1.98337
component_310	Lymph_Node,Spleen	STAT5B	0.000206258	39.8709
component_310	Lymph_Node,Spleen	EOMES	0.000206258	39.8709
component_310	Lymph_Node,Spleen	NFATC2	9.04728e-06	17.0341
component_310	Lymph_Node,Spleen	STAT5A	9.04728e-06	16.7975
component_310	Lymph_Node,Spleen	NFATC1	1.11413e-05	15.1493
component_310	Lymph_Node,Spleen	TFAP4	0.000515263	12.3972
component_310	Lymph_Node,Spleen	IRF9	0.000109855	10.6713
component_310	Lymph_Node,Spleen	TBX21	0.000560766	7.64648
component_310	Lymph_Node,Spleen	STAT4	0.000180513	7.05338
component_310	Lymph_Node,Spleen	HOXA1	0.00082366	6.93077
component_310	Lymph_Node,Spleen	JUND	0.000447122	4.00411
component_310	Lymph_Node,Spleen	USF1	0.00056374	3.63007
component_310	Lymph_Node,Spleen	STAT1	1.11413e-05	3.35904
component_310	Lymph_Node,Spleen	RELA	0.000821542	1.92476
component_310	Lymph_Node,Spleen	NFKB1	0.000821542	1.9176
component_313	Pancreas,Kidney,Lung	ZIC1	0.000242028	16.0016
component_313	Pancreas,Kidney,Lung	AHR	1.6372e-06	13.3347
component_313	Pancreas,Kidney,Lung	MEN1	1.1223e-07	13.2507
component_313	Pancreas,Kidney,Lung	ZEB1	9.29077e-06	9.11264
component_313	Pancreas,Kidney,Lung	CREBBP	0.00077694	6.65222
component_313	Pancreas,Kidney,Lung	RUNX3	0.000364524	5.26461
component_313	Pancreas,Kidney,Lung	STAT1	0.000116501	3.12746
component_316	Kidney	TWIST2	0.000329917	4.62785
component_316	Kidney	TWIST1	0.000827094	4.07378
component_318	Kidney	NR3C2	1.81451e-11	28.2375
component_318	Kidney	KAT5	3.72608e-05	24.1425
component_318	Kidney	USF1	7.19639e-05	4.18477
component_318	Kidney	SPI1	1.51374e-05	3.75992
component_319	Kidney,Heart,Lung	DDX5	7.47468e-06	14.9121
component_319	Kidney,Heart,Lung	FOXF2	3.21311e-05	11.6999
component_319	Kidney,Heart,Lung	FOXO1	2.78518e-07	11.4832
component_319	Kidney,Heart,Lung	CTCF	1.89459e-11	10.1323
component_319	Kidney,Heart,Lung	RFXANK	2.49336e-06	9.87602
component_319	Kidney,Heart,Lung	RFXAP	2.49336e-06	9.87602
component_319	Kidney,Heart,Lung	SP2	3.21311e-05	9.77952
component_319	Kidney,Heart,Lung	HDAC5	0.000396619	9.32807
component_319	Kidney,Heart,Lung	PTTG1	0.000396619	7.68712
component_319	Kidney,Heart,Lung	PPARD	0.000520795	7.26673
component_319	Kidney,Heart,Lung	RFX5	3.21311e-05	7.18004
component_319	Kidney,Heart,Lung	NANOG	4.61725e-05	6.83927
component_319	Kidney,Heart,Lung	TWIST2	0.000119222	4.37233
component_319	Kidney,Heart,Lung	PPARA	0.000121212	4.08966
component_319	Kidney,Heart,Lung	TWIST1	0.000396619	3.84886
component_319	Kidney,Heart,Lung	SP3	6.1411e-05	2.98196
component_319	Kidney,Heart,Lung	SP1	1.67655e-06	2.15333
component_320	Lung	FOXP2	0.000130533	16.7328
component_320	Lung	APC	0.000631946	16.6332
component_320	Lung	NR1H3	0.000952181	14.7383
component_320	Lung	ASH1L	0.000287396	14.0069
component_320	Lung	HEY1	8.91798e-08	12.7161
component_320	Lung	FOSL2	3.16849e-10	11.1907
component_320	Lung	DBP	0.000847522	10.9799
component_320	Lung	KLF5	0.00097809	10.4074
component_320	Lung	PPARD	0.000130533	8.18664
component_320	Lung	JUND	2.99311e-07	5.48239
component_320	Lung	SP3	1.02074e-06	3.44559
component_320	Lung	YY1	0.000631946	3.20378
component_320	Lung	SP1	3.27495e-07	2.22075
component_320	Lung	NFKB1	1.4894e-05	2.16609
component_321	Lymph_Node,Thymus	RBPJ	0.000285256	21.6381
component_321	Lymph_Node,Thymus	ARID3A	0.000285256	21.6381
component_321	Lymph_Node,Thymus	HMGB2	0.000285256	20.9589
component_321	Lymph_Node,Thymus	IRF5	0.000285256	20.9589
component_321	Lymph_Node,Thymus	LRRFIP1	0.000285256	20.9589
component_321	Lymph_Node,Thymus	HDAC11	0.000294517	20.321
component_321	Lymph_Node,Thymus	CEBPB	0.000100506	3.85709
component_321	Lymph_Node,Thymus	E2F1	4.34282e-07	3.84836
component_321	Lymph_Node,Thymus	EGR1	0.000100506	3.2052
component_322	Large_Intestine,Lung	SMAD4	0.000286812	6.27616
component_322	Large_Intestine,Lung	NR3C1	0.000286812	6.01031
component_324	Lung,Heart,Kidney	ELF2	2.32593e-06	20.5912
component_324	Lung,Heart,Kidney	HIF3A	3.5994e-06	18.9249
component_324	Lung,Heart,Kidney	GFI1B	3.73153e-06	18.6553
component_324	Lung,Heart,Kidney	ISL1	4.58925e-06	17.7935
component_324	Lung,Heart,Kidney	TFDP1	1.12228e-05	15.2279
component_324	Lung,Heart,Kidney	HIPK2	4.19495e-08	14.7206
component_324	Lung,Heart,Kidney	TRIM28	1.39584e-05	14.4548
component_324	Lung,Heart,Kidney	ZNF382	1.39584e-05	14.4548
component_324	Lung,Heart,Kidney	WHSC1	1.39584e-05	14.4548
component_324	Lung,Heart,Kidney	XRCC5	0.000532186	13.2874
component_324	Lung,Heart,Kidney	ETV7	0.000532186	13.2874
component_324	Lung,Heart,Kidney	SP100	0.000532186	13.2874
component_324	Lung,Heart,Kidney	LMX1B	3.51325e-05	12.2852
component_324	Lung,Heart,Kidney	UHRF1	1.71134e-05	10.9247
component_324	Lung,Heart,Kidney	HDAC7	3.0191e-06	10.0476
component_324	Lung,Heart,Kidney	TAL1	4.00841e-07	9.69358
component_324	Lung,Heart,Kidney	LYL1	0.000160735	9.61529
component_324	Lung,Heart,Kidney	GATA6	5.01071e-08	9.4216
component_324	Lung,Heart,Kidney	ELF1	6.24851e-09	9.41313
component_324	Lung,Heart,Kidney	ELF3	0.000699419	9.14101
component_324	Lung,Heart,Kidney	TFCP2	0.000305429	8.64995
component_324	Lung,Heart,Kidney	MYCN	1.08009e-05	8.41214
component_324	Lung,Heart,Kidney	VHL	3.63056e-07	7.86548
component_324	Lung,Heart,Kidney	NKX2-5	0.000532186	7.72171
component_324	Lung,Heart,Kidney	POU5F1	0.000558619	7.61397
component_324	Lung,Heart,Kidney	ERG	4.43809e-15	7.52617
component_324	Lung,Heart,Kidney	SMAD4	6.91281e-07	7.3326
component_324	Lung,Heart,Kidney	MZF1	6.08504e-06	6.98082
component_324	Lung,Heart,Kidney	FLI1	3.51353e-08	6.97504
component_324	Lung,Heart,Kidney	RB1	5.37478e-05	6.73941
component_324	Lung,Heart,Kidney	GATA2	1.98583e-05	6.70778
component_324	Lung,Heart,Kidney	NR3C1	4.58925e-06	6.52042
component_324	Lung,Heart,Kidney	GATA3	2.16182e-07	5.04469
component_324	Lung,Heart,Kidney	ETS1	4.43809e-15	4.96489
component_324	Lung,Heart,Kidney	SREBF1	0.000333334	4.86512
component_324	Lung,Heart,Kidney	PAX5	0.000927959	4.63084
component_324	Lung,Heart,Kidney	ETS2	7.4576e-07	4.56626
component_324	Lung,Heart,Kidney	WT1	2.06379e-06	4.44913
component_324	Lung,Heart,Kidney	POU2F1	0.000532186	3.69631
component_324	Lung,Heart,Kidney	KLF4	0.000980754	3.63111
component_324	Lung,Heart,Kidney	STAT3	2.06379e-06	3.26837
component_324	Lung,Heart,Kidney	TP53	1.71134e-05	3.13188
component_325	Kidney	NR2F6	0.000762527	15.3696
component_325	Kidney	KLF5	7.2123e-05	14.0053
component_326	Lung	RFXANK	8.23084e-05	8.2435
component_326	Lung	RFXAP	8.23084e-05	8.2435
component_326	Lung	RFX5	4.85234e-06	7.99089
component_326	Lung	PPARD	0.000427047	7.41343
component_326	Lung	RB1	0.000101151	6.83659
component_326	Lung	RFX1	0.00030875	6.68252
component_326	Lung	TWIST2	3.68242e-07	5.65009
component_326	Lung	TWIST1	1.70637e-07	5.49718
component_326	Lung	SIRT1	8.70021e-05	4.4592
component_326	Lung	MYB	5.69351e-05	4.4342
component_326	Lung	TP53	3.15402e-08	4.06661
component_326	Lung	HDAC1	0.000101151	3.70993
component_326	Lung	HIF1A	0.000851002	3.54339
component_326	Lung	SP3	6.1192e-06	3.27617
component_326	Lung	CEBPA	0.000148339	3.19655
component_326	Lung	JUN	2.38875e-05	2.82579
component_326	Lung	NFKB1	3.68242e-07	2.36718
component_326	Lung	RELA	3.73219e-06	2.25521
component_326	Lung	SP1	1.01015e-05	2.06565
component_328	Kidney	FOXC1	6.5237e-05	54.9701
component_328	Kidney	TIAL1	6.44148e-07	47.8102
component_328	Kidney	PBX1	6.44148e-07	47.8102
component_328	Kidney	MEIS1	6.44148e-07	47.8102
component_328	Kidney	CITED2	2.73967e-06	35.7824
component_328	Kidney	ATF6	0.000346666	31.6078
component_328	Kidney	ZNF148	8.46546e-06	27.8893
component_328	Kidney	HDAC9	8.46546e-06	27.6185
component_328	Kidney	PROX1	0.000981016	22.1809
component_328	Kidney	PITX1	9.55594e-05	17.1368
component_328	Kidney	KHDRBS1	0.000171884	15.0513
component_328	Kidney	HDAC4	0.000346666	12.814
component_328	Kidney	PKNOX1	0.000346666	12.5317
component_328	Kidney	PBX2	0.000346666	12.5317
component_328	Kidney	ING2	0.000594791	11.1121
component_328	Kidney	NFKBIA	9.55594e-05	5.77605
component_328	Kidney	FOS	0.000350206	4.81745
component_329	Spleen	BACH1	0.000214375	17.1491
component_329	Spleen	TBR1	0.000214375	16.9956
component_329	Spleen	NFE2	0.000214375	16.9956
component_329	Spleen	ETS1	0.000214375	3.09057
component_330	Kidney	FOXF2	1.80078e-05	12.1019
component_330	Kidney	PPARD	1.36643e-07	11.2746
component_330	Kidney	TFAP2B	3.57015e-05	10.6163
component_330	Kidney	VHL	8.1053e-09	9.24539
component_330	Kidney	RFXANK	0.000360551	7.42933
component_330	Kidney	RFXAP	0.000360551	7.42933
component_330	Kidney	HNF1A	6.80566e-06	7.37711
component_330	Kidney	HOXA1	0.00037089	7.35127
component_330	Kidney	CREBBP	0.000990336	6.23726
component_330	Kidney	CIITA	3.03559e-06	5.59359
component_330	Kidney	HSF1	0.000147335	5.16332
component_330	Kidney	USF2	7.78196e-06	5.1329
component_330	Kidney	USF1	9.50741e-07	4.8129
component_330	Kidney	KLF4	2.68904e-05	4.59647
component_330	Kidney	MYC	2.68904e-05	4.58006
component_330	Kidney	JUND	2.88742e-05	4.53018
component_330	Kidney	PPARA	6.07084e-05	4.23016
component_330	Kidney	HIF1A	0.000184619	3.83211
component_330	Kidney	STAT3	7.33745e-08	3.70929
component_330	Kidney	CREB1	0.000382993	3.55018
component_330	Kidney	HDAC1	0.000743609	3.34352
component_330	Kidney	TFAP2A	0.000760288	3.32546
component_330	Kidney	JUN	7.38999e-07	3.1423
component_330	Kidney	RELA	3.27087e-09	2.61318
component_330	Kidney	NFKB1	3.27087e-09	2.60345
component_330	Kidney	SP1	6.74757e-07	2.19407
component_331	Kidney	PCBD1	9.40915e-05	17.5956
component_331	Kidney	MBD2	9.40915e-05	16.5901
component_331	Kidney	DDB2	9.40915e-05	16.4491
component_331	Kidney	PAWR	9.40915e-05	16.4491
component_331	Kidney	ATM	9.40915e-05	16.4491
component_331	Kidney	PER1	9.40915e-05	16.4491
component_331	Kidney	BACH2	9.40915e-05	16.4491
component_331	Kidney	SMAD2	9.40915e-05	16.4491
component_331	Kidney	SIM2	9.40915e-05	16.4491
component_331	Kidney	ERCC2	9.40915e-05	16.4491
component_331	Kidney	GLI2	0.000208313	14.0936
component_331	Kidney	ING2	0.000653602	11.3409
component_331	Kidney	TBP	0.000729187	10.8331
component_331	Kidney	PGR	0.000729187	10.7928
component_331	Kidney	HNF1B	0.000729187	10.7132
component_331	Kidney	DEK	0.000989302	10.0286
component_331	Kidney	PAX5	9.40915e-05	5.74905
component_332	Kidney	MEF2A	0.000232587	21.3007
component_333	Heart	SMAD4	0.000593804	5.43857
component_333	Heart	SRF	0.000218499	4.42663
component_333	Heart	ETS2	4.32692e-05	4.06414
component_333	Heart	KLF4	0.000424273	4.0605
component_333	Heart	GATA1	1.73991e-05	4.02373
component_333	Heart	SPI1	3.38354e-06	3.92919
component_333	Heart	TP53	2.75252e-07	3.90248
component_333	Heart	TFAP2A	0.000108001	3.77704
component_333	Heart	CEBPA	6.65653e-06	3.73947
component_333	Heart	WT1	0.000362604	3.6959
component_333	Heart	ETS1	1.09184e-06	3.51506
component_333	Heart	YY1	0.000683225	3.16508
component_333	Heart	JUN	1.73991e-05	2.89252
component_333	Heart	SP3	0.00023503	2.87446
component_333	Heart	STAT3	0.000317288	2.80866
component_333	Heart	SP1	2.75252e-07	2.28224
component_333	Heart	NFKB1	1.73991e-05	2.17667
component_333	Heart	RELA	2.8473e-05	2.14358
component_334	Kidney	MEF2A	0.000230615	21.3321
component_335	Heart,Lung	STAT5B	0.000134092	43.1737
component_335	Heart,Lung	EOMES	0.000134092	43.1737
component_335	Heart,Lung	STAT5A	6.69746e-05	15.9153
component_335	Heart,Lung	NFATC1	8.95028e-05	14.3537
component_335	Heart,Lung	TBX21	3.45304e-05	10.3499
component_335	Heart,Lung	MSC	8.95028e-05	9.01102
component_335	Heart,Lung	STAT4	8.95028e-05	7.63765
component_335	Heart,Lung	STAT1	0.000143092	3.09843
component_335	Heart,Lung	RELA	6.69746e-05	2.16757
component_335	Heart,Lung	NFKB1	9.01682e-05	2.11798
component_336	Kidney,Lung	NFIB	0.000121109	17.0324
component_336	Kidney,Lung	TRIM28	5.05517e-05	15.1775
component_336	Kidney,Lung	ZNF382	5.05517e-05	15.1775
component_336	Kidney,Lung	WHSC1	5.05517e-05	15.1775
component_336	Kidney,Lung	TFDP1	0.000325546	13.7051
component_336	Kidney,Lung	MAL	0.000205199	11.4209
component_336	Kidney,Lung	XBP1	2.04231e-05	6.95459
component_336	Kidney,Lung	ATF3	5.54964e-05	6.33678
component_336	Kidney,Lung	TP53	1.33513e-08	4.20925
component_340	Heart	MED1	4.58101e-06	17.8737
component_340	Heart	ARNTL	0.000716175	13.2285
component_340	Heart	PPARGC1A	0.000507558	8.92692
component_344	Kidney	FOXC1	0.000170962	59.1462
component_344	Kidney	TIAL1	0.000604121	34.2948
component_344	Kidney	PBX1	0.000604121	34.2948
component_344	Kidney	MEIS1	0.000604121	34.2948
component_344	Kidney	GFI1	0.000758316	30.9173
component_344	Kidney	RUNX2	0.000170962	8.55932
component_346	Large_Intestine,Kidney,Lung	IRF1	0.000229168	5.59695
component_346	Large_Intestine,Kidney,Lung	HSF1	0.000472536	5.49682
component_346	Large_Intestine,Kidney,Lung	RELA	0.000229168	2.17341
component_346	Large_Intestine,Kidney,Lung	NFKB1	0.000869553	2.0354
component_347	Kidney,Liver	NR3C1	0.000209493	6.62639
component_348	Kidney,Large_Intestine,Lung	TRIM16	0.000224896	21.9117
component_348	Kidney,Large_Intestine,Lung	TP63	5.48123e-05	12.0804
component_348	Kidney,Large_Intestine,Lung	FOSB	0.00022007	11.5343
component_348	Kidney,Large_Intestine,Lung	PPARD	1.98288e-06	11.0629
component_348	Kidney,Large_Intestine,Lung	ATF4	0.000162409	7.2884
component_348	Kidney,Large_Intestine,Lung	XBP1	0.000204734	6.17013
component_348	Kidney,Large_Intestine,Lung	PPARA	0.000224896	4.24506
component_348	Kidney,Large_Intestine,Lung	HIF1A	0.000638954	3.8456
component_348	Kidney,Large_Intestine,Lung	RELA	4.43859e-07	2.49126
component_348	Kidney,Large_Intestine,Lung	NFKB1	9.91613e-06	2.30781
component_349	Thymus,Lymph_Node,Spleen	SUGP1	0.000489505	20.9032
component_349	Thymus,Lymph_Node,Spleen	HMGB2	0.00065004	18.5598
component_349	Thymus,Lymph_Node,Spleen	IRF5	0.00065004	18.5598
component_349	Thymus,Lymph_Node,Spleen	LRRFIP1	0.00065004	18.5598
component_349	Thymus,Lymph_Node,Spleen	NR4A2	0.00065004	18.3134
component_349	Thymus,Lymph_Node,Spleen	NEAT1	0.00065004	18.3134
component_349	Thymus,Lymph_Node,Spleen	ZNF300	0.00065004	18.3134
component_349	Thymus,Lymph_Node,Spleen	HDAC11	0.00067065	17.9949
component_349	Thymus,Lymph_Node,Spleen	KDM2A	0.000682901	17.7632
component_349	Thymus,Lymph_Node,Spleen	HR	0.000902611	16.359
component_349	Thymus,Lymph_Node,Spleen	IRF8	2.60672e-06	14.9416
component_349	Thymus,Lymph_Node,Spleen	FOSB	4.80619e-07	14.8998
component_349	Thymus,Lymph_Node,Spleen	DEK	3.25745e-06	14.2965
component_349	Thymus,Lymph_Node,Spleen	ZFP36	0.00035081	14.213
component_349	Thymus,Lymph_Node,Spleen	PPARD	2.50921e-09	13.136
component_349	Thymus,Lymph_Node,Spleen	ASH1L	0.000494177	12.9663
component_349	Thymus,Lymph_Node,Spleen	HOXA1	3.24823e-08	11.8591
component_349	Thymus,Lymph_Node,Spleen	SMAD7	0.000132789	9.7221
component_349	Thymus,Lymph_Node,Spleen	ING4	3.75004e-05	9.68149
component_349	Thymus,Lymph_Node,Spleen	KLF2	4.67246e-05	9.31122
component_349	Thymus,Lymph_Node,Spleen	XBP1	3.48504e-09	9.01707
component_349	Thymus,Lymph_Node,Spleen	NFAT5	0.000256757	8.65348
component_349	Thymus,Lymph_Node,Spleen	NFIL3	1.44756e-06	8.16339
component_349	Thymus,Lymph_Node,Spleen	FOXO1	0.000530383	7.45161
component_349	Thymus,Lymph_Node,Spleen	HSF1	4.44338e-08	7.404
component_349	Thymus,Lymph_Node,Spleen	PPARA	7.12922e-12	7.10847
component_349	Thymus,Lymph_Node,Spleen	ATF5	0.000289427	7.02093
component_349	Thymus,Lymph_Node,Spleen	ATF2	4.84894e-05	6.74517
component_349	Thymus,Lymph_Node,Spleen	PAX5	3.33354e-06	6.65902
component_349	Thymus,Lymph_Node,Spleen	GLI1	0.000494177	6.38217
component_349	Thymus,Lymph_Node,Spleen	NFKBIA	1.40704e-05	6.3028
component_349	Thymus,Lymph_Node,Spleen	VHL	9.56185e-05	6.21447
component_349	Thymus,Lymph_Node,Spleen	RB1	0.00065004	5.96374
component_349	Thymus,Lymph_Node,Spleen	NFE2L2	0.000659691	5.93382
component_349	Thymus,Lymph_Node,Spleen	ATF4	0.000682901	5.85823
component_349	Thymus,Lymph_Node,Spleen	STAT1	1.62816e-16	5.81855
component_349	Thymus,Lymph_Node,Spleen	ETS2	1.14623e-09	5.77244
component_349	Thymus,Lymph_Node,Spleen	SPI1	3.82567e-13	5.75517
component_349	Thymus,Lymph_Node,Spleen	DNMT1	0.000789472	5.72058
component_349	Thymus,Lymph_Node,Spleen	PPARG	7.93854e-12	5.6275
component_349	Thymus,Lymph_Node,Spleen	REL	3.90945e-05	5.58296
component_349	Thymus,Lymph_Node,Spleen	SIRT1	3.54561e-06	5.18651
component_349	Thymus,Lymph_Node,Spleen	TWIST1	3.5511e-06	4.85243
component_349	Thymus,Lymph_Node,Spleen	MYB	7.77471e-06	4.83509
component_349	Thymus,Lymph_Node,Spleen	FLI1	0.00035081	4.71491
component_349	Thymus,Lymph_Node,Spleen	CEBPB	2.83796e-06	4.26948
component_349	Thymus,Lymph_Node,Spleen	USF2	0.000494177	4.14022
component_349	Thymus,Lymph_Node,Spleen	STAT3	1.46588e-09	4.1139
component_349	Thymus,Lymph_Node,Spleen	HDAC1	1.7043e-05	4.04534
component_349	Thymus,Lymph_Node,Spleen	NFKB1	1.45691e-24	3.93742
component_349	Thymus,Lymph_Node,Spleen	RELA	2.36707e-24	3.90821
component_349	Thymus,Lymph_Node,Spleen	ETS1	1.80971e-08	3.86924
component_349	Thymus,Lymph_Node,Spleen	YY1	1.46911e-05	3.74623
component_349	Thymus,Lymph_Node,Spleen	CREB1	0.00035081	3.57948
component_349	Thymus,Lymph_Node,Spleen	TFAP2A	0.000217527	3.57644
component_349	Thymus,Lymph_Node,Spleen	CEBPA	2.26468e-05	3.48555
component_349	Thymus,Lymph_Node,Spleen	E2F1	7.48094e-06	3.40785
component_349	Thymus,Lymph_Node,Spleen	JUN	6.26471e-08	3.37945
component_349	Thymus,Lymph_Node,Spleen	EGR1	0.00018395	2.98023
component_349	Thymus,Lymph_Node,Spleen	SP1	3.01262e-05	2.00213
component_350	Kidney	KCNIP3	4.21771e-05	15.0396
component_350	Kidney	CEBPE	0.00057679	9.64838
component_351	Lymph_Node,Thymus	NFKB1	1.85959e-06	2.43104
component_351	Lymph_Node,Thymus	RELA	5.74025e-06	2.35139
component_353	Heart,Liver,Spleen	DDX5	3.83355e-10	23.4736
component_353	Heart,Liver,Spleen	PLAG1	0.00017082	18.4229
component_353	Heart,Liver,Spleen	SUZ12	0.00017082	18.4229
component_353	Heart,Liver,Spleen	DLX5	0.00018729	17.9267
component_353	Heart,Liver,Spleen	KHDRBS1	0.000512838	14.0853
component_353	Heart,Liver,Spleen	PLAGL2	0.000554731	13.7577
component_353	Heart,Liver,Spleen	TFAP2C	4.05152e-05	13.1463
component_353	Heart,Liver,Spleen	MAL	5.3895e-05	12.3819
component_353	Heart,Liver,Spleen	MKL1	1.84768e-05	12.3282
component_353	Heart,Liver,Spleen	HDAC5	1.84768e-05	12.2045
component_353	Heart,Liver,Spleen	TFAP2B	2.21648e-05	11.75
component_353	Heart,Liver,Spleen	CTCF	7.85391e-13	11.5996
component_353	Heart,Liver,Spleen	SRF	4.46872e-13	8.66574
component_353	Heart,Liver,Spleen	HOXB7	5.40015e-05	8.20515
component_353	Heart,Liver,Spleen	MZF1	3.85934e-06	7.94661
component_353	Heart,Liver,Spleen	FLI1	2.93508e-08	7.49892
component_353	Heart,Liver,Spleen	HDAC2	1.84768e-05	6.73953
component_353	Heart,Liver,Spleen	SMAD4	4.05152e-05	6.5584
component_353	Heart,Liver,Spleen	NFIC	0.000158852	6.13038
component_353	Heart,Liver,Spleen	TP53	2.35671e-11	4.84864
component_353	Heart,Liver,Spleen	RUNX1	6.73518e-05	4.38569
component_353	Heart,Liver,Spleen	TWIST2	0.000959166	4.00444
component_353	Heart,Liver,Spleen	TFAP2A	6.73518e-05	3.91065
component_353	Heart,Liver,Spleen	ERG	0.000393551	3.86915
component_353	Heart,Liver,Spleen	AR	0.000147979	3.50342
component_353	Heart,Liver,Spleen	STAT3	3.42065e-06	3.46396
component_353	Heart,Liver,Spleen	JUN	8.95575e-07	3.2733
component_353	Heart,Liver,Spleen	CEBPA	0.000195663	3.24544
component_353	Heart,Liver,Spleen	ETS1	2.21648e-05	3.21124
component_353	Heart,Liver,Spleen	NFKB1	4.05152e-05	2.16112
component_353	Heart,Liver,Spleen	RELA	0.000208589	2.03362
component_353	Heart,Liver,Spleen	SP1	4.05152e-05	2.02365
component_356	Kidney	TRPS1	0.000427813	33.2487
component_356	Kidney	SRCAP	0.000427813	33.2487
component_356	Kidney	BTG2	0.000427813	33.2487
component_356	Kidney	FOXP1	0.000427813	33.2487
component_356	Kidney	SIN3A	0.000427813	33.2487
component_356	Kidney	AATF	0.000427813	33.2487
component_356	Kidney	FUS	0.000427813	33.2487
component_356	Kidney	RREB1	0.000427813	33.2487
component_356	Kidney	RUNX2	0.000998146	7.25223
component_357	Large_Intestine	ING1	0.0003633	16.9009
component_357	Large_Intestine	MYBL2	0.0003633	16.9009
component_357	Large_Intestine	SKI	0.0003633	16.0985
component_357	Large_Intestine	ZBTB14	0.0003633	16.0985
component_357	Large_Intestine	POU3F2	0.0003633	15.7252
component_357	Large_Intestine	MKL1	3.51373e-07	15.7024
component_357	Large_Intestine	PCGF2	0.0003633	15.5005
component_357	Large_Intestine	GFI1B	0.0003633	15.4564
component_357	Large_Intestine	XRCC5	0.0003633	15.4125
component_357	Large_Intestine	HINFP	0.0003633	15.4125
component_357	Large_Intestine	ETV7	0.0003633	15.4125
component_357	Large_Intestine	SP100	0.0003633	15.4125
component_357	Large_Intestine	DDB2	0.0003633	15.3688
component_357	Large_Intestine	PAWR	0.0003633	15.3688
component_357	Large_Intestine	ATM	0.0003633	15.3688
component_357	Large_Intestine	PER1	0.0003633	15.3688
component_357	Large_Intestine	BACH2	0.0003633	15.3688
component_357	Large_Intestine	SMAD2	0.0003633	15.3688
component_357	Large_Intestine	SIM2	0.0003633	15.3688
component_357	Large_Intestine	ERCC2	0.0003633	15.3688
component_357	Large_Intestine	ISL1	0.000413062	14.7424
component_357	Large_Intestine	MAML1	0.000413062	14.5447
component_357	Large_Intestine	NKX2-3	0.000413062	14.5447
component_357	Large_Intestine	GLI2	0.000622141	13.1679
component_357	Large_Intestine	TFDP1	0.000739049	12.6167
component_357	Large_Intestine	ARNTL	0.000911141	11.9235
component_357	Large_Intestine	ATF5	3.36302e-05	9.20303
component_357	Large_Intestine	NR3C1	2.09785e-07	8.72684
component_357	Large_Intestine	GLI1	4.24344e-05	8.36574
component_357	Large_Intestine	BRCA1	0.000336535	6.45087
component_357	Large_Intestine	SMAD4	0.0003633	6.07524
component_357	Large_Intestine	ATF1	0.0003633	5.70772
component_357	Large_Intestine	PAX5	0.000385919	5.37147
component_357	Large_Intestine	SRF	3.43834e-05	5.29803
component_357	Large_Intestine	RARA	0.000792532	4.7968
component_357	Large_Intestine	TFAP2A	4.24344e-05	4.2192
component_357	Large_Intestine	ETS1	0.000622141	2.74859
component_361	Lymph_Node,Thymus	SLA2	0.000479897	17.8497
component_361	Lymph_Node,Thymus	PCGF2	0.000479897	15.7077
component_361	Lymph_Node,Thymus	ZBTB7A	0.000479897	15.7077
component_361	Lymph_Node,Thymus	GFI1B	0.000479897	15.663
component_361	Lymph_Node,Thymus	HINFP	0.000479897	15.6185
component_361	Lymph_Node,Thymus	RORA	0.000479897	15.6185
component_361	Lymph_Node,Thymus	DDB2	0.000479897	15.5742
component_361	Lymph_Node,Thymus	PAWR	0.000479897	15.5742
component_361	Lymph_Node,Thymus	ATM	0.000479897	15.5742
component_361	Lymph_Node,Thymus	PER1	0.000479897	15.5742
component_361	Lymph_Node,Thymus	BACH2	0.000479897	15.5742
component_361	Lymph_Node,Thymus	SMAD2	0.000479897	15.5742
component_361	Lymph_Node,Thymus	SIM2	0.000479897	15.5742
component_361	Lymph_Node,Thymus	ERCC2	0.000479897	15.5742
component_361	Lymph_Node,Thymus	SALL3	0.000479897	15.3997
component_361	Lymph_Node,Thymus	ISL1	0.000529213	14.9394
component_361	Lymph_Node,Thymus	GLI2	0.00082804	13.3439
component_361	Lymph_Node,Thymus	PTTG1	4.88688e-06	11.3589
component_361	Lymph_Node,Thymus	XBP1	9.86075e-07	8.3843
component_361	Lymph_Node,Thymus	HSF1	9.86075e-07	7.37617
component_361	Lymph_Node,Thymus	BRCA1	0.000419962	6.5371
component_361	Lymph_Node,Thymus	RB1	0.000922512	6.33741
component_361	Lymph_Node,Thymus	PAX5	0.000479897	5.44327
component_361	Lymph_Node,Thymus	FOXA1	0.000536308	5.30923
component_361	Lymph_Node,Thymus	MYC	8.8442e-05	4.9072
component_364	Lymph_Node,Spleen	TCF7L2	1.70189e-05	13.1082
component_364	Lymph_Node,Spleen	ZNRD1	1.97683e-05	12.6221
component_364	Lymph_Node,Spleen	ZBTB16	6.99345e-05	10.0775
component_364	Lymph_Node,Spleen	MSC	0.000145008	9.01944
component_364	Lymph_Node,Spleen	LMO2	0.000154727	8.84807
component_364	Lymph_Node,Spleen	MYCN	0.000303121	7.95689
component_364	Lymph_Node,Spleen	BRCA1	6.65546e-06	7.89067
component_364	Lymph_Node,Spleen	ATF5	0.000414764	7.50472
component_364	Lymph_Node,Spleen	XBP1	1.40335e-05	7.22881
component_364	Lymph_Node,Spleen	HSF1	3.96773e-06	6.92492
component_364	Lymph_Node,Spleen	PITX2	0.00070331	6.90716
component_364	Lymph_Node,Spleen	NR1I2	0.000758782	6.78013
component_364	Lymph_Node,Spleen	SATB1	2.04141e-05	6.70986
component_364	Lymph_Node,Spleen	PAX5	2.28583e-05	6.57035
component_364	Lymph_Node,Spleen	NR3C1	0.000303121	5.93034
component_364	Lymph_Node,Spleen	GATA3	3.96773e-06	5.11252
component_364	Lymph_Node,Spleen	ETS1	4.55551e-05	3.20195
component_364	Lymph_Node,Spleen	RELA	1.68317e-08	2.67549
component_364	Lymph_Node,Spleen	NFKB1	1.68317e-08	2.66553
component_366	Pancreas,Lung,Liver	NRF1	4.09641e-05	38.0689
component_366	Pancreas,Lung,Liver	MED1	0.000464776	14.8545
component_370	Kidney	NR2F1	4.04858e-05	15.1245
component_374	Liver,Spleen,Thymus	RFXANK	3.21117e-08	13.0971
component_374	Liver,Spleen,Thymus	RFXAP	3.21117e-08	13.0971
component_374	Liver,Spleen,Thymus	ZNRD1	1.21881e-05	12.904
component_374	Liver,Spleen,Thymus	TCF7L2	9.89583e-05	11.7259
component_374	Liver,Spleen,Thymus	ZBTB16	5.94692e-05	10.3026
component_374	Liver,Spleen,Thymus	RFX5	6.2643e-07	9.52179
component_374	Liver,Spleen,Thymus	MYCN	0.000248059	8.13463
component_374	Liver,Spleen,Thymus	CREBBP	0.000438311	7.33039
component_374	Liver,Spleen,Thymus	HSF1	1.32436e-06	7.0796
component_374	Liver,Spleen,Thymus	RFX1	0.000506407	7.07802
component_374	Liver,Spleen,Thymus	PITX2	0.000506407	7.06144
component_374	Liver,Spleen,Thymus	STAT4	0.000506407	7.03398
component_374	Liver,Spleen,Thymus	NR1I2	0.000536941	6.93157
component_374	Liver,Spleen,Thymus	CIITA	5.02872e-07	6.57391
component_374	Liver,Spleen,Thymus	PAX5	0.000438311	5.59759
component_374	Liver,Spleen,Thymus	GATA3	4.0315e-07	5.51709
component_374	Liver,Spleen,Thymus	RUNX1	1.21881e-05	4.96744
component_374	Liver,Spleen,Thymus	WT1	0.000244804	4.03346
component_374	Liver,Spleen,Thymus	CREB1	0.000308101	3.9116
component_374	Liver,Spleen,Thymus	EGR1	3.96413e-06	3.722
component_374	Liver,Spleen,Thymus	ETS1	8.90642e-05	3.13708
component_374	Liver,Spleen,Thymus	RELA	7.3269e-09	2.73525
component_374	Liver,Spleen,Thymus	NFKB1	7.3269e-09	2.72507
component_375	Large_Intestine	PIAS1	1.90595e-06	20.5938
component_375	Large_Intestine	HIPK2	3.23875e-05	12.9632
component_375	Large_Intestine	GATA4	8.02032e-07	11.1136
component_375	Large_Intestine	HDAC7	0.00019799	9.73284
component_375	Large_Intestine	NFYC	0.00019799	9.40942
component_375	Large_Intestine	NFYA	0.00019799	9.40942
component_375	Large_Intestine	ZEB1	0.000405616	8.23004
component_375	Large_Intestine	NFYB	0.000745772	7.44558
component_375	Large_Intestine	SPDEF	0.000847367	7.21439
component_375	Large_Intestine	ETV4	1.20935e-05	6.39662
component_375	Large_Intestine	HDAC1	0.000313762	3.93626
component_376	Kidney	PHOX2B	5.27083e-07	53.047
component_376	Kidney	FOXQ1	6.62921e-06	32.4316
component_376	Kidney	HAND2	9.60972e-05	19.5516
component_376	Kidney	NR2F1	1.03043e-07	19.2005
component_376	Kidney	NR2F6	0.000101104	18.646
component_376	Kidney	NR0B2	0.000112683	17.7282
component_378	Kidney	THRB	1.98155e-06	42.5404
component_378	Kidney	DLX3	1.98155e-06	42.5404
component_378	Kidney	THRA	0.000173262	17.6521
component_378	Kidney	POU1F1	0.00030783	15.3565
component_378	Kidney	KLF5	0.000734765	12.7542
component_378	Kidney	NKX2-5	0.000171697	10.7689
component_380	Large_Intestine,Lung,Heart	SIRT1	0.000112613	5.38287
component_380	Large_Intestine,Lung,Heart	ERG	0.00056174	4.45941
component_381	Liver	NR2F6	1.2932e-10	31.7366
component_381	Liver	NR0B2	1.82064e-10	30.1745
component_381	Liver	NR2F1	2.28204e-15	29.4125
component_381	Liver	NCOA6	3.9938e-05	23.9657
component_381	Liver	NR1I3	3.9938e-05	23.9657
component_381	Liver	HNF4G	3.99543e-05	23.7701
component_381	Liver	TEF	5.53247e-05	21.9761
component_381	Liver	PLAG1	7.93622e-05	20.1511
component_381	Liver	SUZ12	7.93622e-05	20.1511
component_381	Liver	PPARGC1A	7.15044e-13	19.4338
component_381	Liver	SOX17	0.000166246	17.179
component_381	Liver	EWSR1	0.000171098	16.9786
component_381	Liver	HOXD1	0.000188567	16.5445
component_381	Liver	KHDRBS1	0.00023967	15.4065
component_381	Liver	TFCP2	6.09716e-08	15.3862
component_381	Liver	PLAGL2	0.000259023	15.0482
component_381	Liver	THRA	0.000259023	15.0095
component_381	Liver	ASH1L	0.000289213	14.5957
component_381	Liver	SP2	1.81484e-07	13.6067
component_381	Liver	HNF4A	2.85934e-21	13.5434
component_381	Liver	SNAI1	2.95708e-07	12.8275
component_381	Liver	MEF2D	0.000623861	12.2862
component_381	Liver	DDX5	0.000776885	11.6707
component_381	Liver	DBP	0.000834828	11.4414
component_381	Liver	HNF1A	9.06358e-10	11.1636
component_381	Liver	FOXA2	2.45802e-09	10.2952
component_381	Liver	KLF8	2.66727e-06	9.87063
component_381	Liver	RXRA	3.92251e-06	9.36282
component_381	Liver	PARP1	3.02527e-08	9.28075
component_381	Liver	ATF4	1.10234e-05	8.24299
component_381	Liver	FOSL2	1.10234e-05	8.23134
component_381	Liver	SMAD3	3.99543e-05	7.98371
component_381	Liver	ATF2	2.17481e-05	7.59279
component_381	Liver	NR1H4	2.21822e-05	7.54362
component_381	Liver	CEBPA	2.28204e-15	6.53925
component_381	Liver	TWIST1	5.48075e-09	6.42612
component_381	Liver	ESR2	0.000204619	6.29208
component_381	Liver	PPARA	3.2588e-08	6.08133
component_381	Liver	SMAD4	0.000311918	5.86932
component_381	Liver	FOXA1	0.000190019	5.62402
component_381	Liver	TWIST2	3.95689e-06	5.47509
component_381	Liver	MYC	3.3145e-05	4.85162
component_381	Liver	CEBPB	4.5179e-07	4.806
component_381	Liver	VDR	0.00094142	4.50923
component_381	Liver	SP3	3.07446e-09	4.30851
component_381	Liver	HDAC1	0.000189966	3.79475
component_381	Liver	STAT3	2.74611e-06	3.50824
component_381	Liver	AR	0.000984893	3.19339
component_381	Liver	SP1	9.9378e-12	2.77691
component_381	Liver	RELA	7.88448e-07	2.4221
component_381	Liver	NFKB1	8.28946e-07	2.41309
component_382	Heart,Lung,Large_Intestine	NR4A3	0.00041905	17.1444
component_382	Heart,Lung,Large_Intestine	HIF3A	0.00041905	16.6984
component_382	Heart,Lung,Large_Intestine	PCGF2	0.00041905	16.5076
component_382	Heart,Lung,Large_Intestine	HOXD1	0.00041905	16.4138
component_382	Heart,Lung,Large_Intestine	DDB2	0.00041905	16.3673
component_382	Heart,Lung,Large_Intestine	PAWR	0.00041905	16.3673
component_382	Heart,Lung,Large_Intestine	ATM	0.00041905	16.3673
component_382	Heart,Lung,Large_Intestine	PER1	0.00041905	16.3673
component_382	Heart,Lung,Large_Intestine	BACH2	0.00041905	16.3673
component_382	Heart,Lung,Large_Intestine	SMAD2	0.00041905	16.3673
component_382	Heart,Lung,Large_Intestine	SIM2	0.00041905	16.3673
component_382	Heart,Lung,Large_Intestine	ERCC2	0.00041905	16.3673
component_382	Heart,Lung,Large_Intestine	GLI2	0.000827773	14.0234
component_382	Heart,Lung,Large_Intestine	HOXA1	1.91352e-05	11.0366
component_382	Heart,Lung,Large_Intestine	HOXD3	4.63703e-05	9.28884
component_382	Heart,Lung,Large_Intestine	RB1	8.30025e-05	8.32515
component_382	Heart,Lung,Large_Intestine	SMAD4	0.00041905	6.46994
component_382	Heart,Lung,Large_Intestine	NR3C1	0.00041905	6.19588
component_382	Heart,Lung,Large_Intestine	PAX5	0.00041905	5.72045
component_383	Kidney	MEF2C	2.30785e-07	43.5235
component_383	Kidney	LMX1B	4.59976e-11	26.1304
component_383	Kidney	MEF2A	3.21435e-06	25.5083
component_383	Kidney	CEBPG	3.21435e-06	25.4152
component_383	Kidney	KLF1	3.21435e-06	25.4152
component_383	Kidney	ZNF24	4.78461e-06	23.1354
component_383	Kidney	ETV6	4.78461e-06	23.0588
component_383	Kidney	ELF2	6.22765e-06	21.8986
component_383	Kidney	HIF3A	8.76167e-06	20.1265
component_383	Kidney	ILF3	8.76167e-06	20.0108
component_383	Kidney	XRCC5	8.76167e-06	19.7834
component_383	Kidney	ETV7	8.76167e-06	19.7834
component_383	Kidney	SP100	8.76167e-06	19.7834
component_383	Kidney	HOXD1	8.76167e-06	19.7834
component_383	Kidney	RORA	8.76167e-06	19.7834
component_383	Kidney	PTTG1	8.06317e-11	16.7859
component_383	Kidney	POU2F2	2.7159e-09	15.5095
component_383	Kidney	TRIM28	3.06095e-05	15.3725
component_383	Kidney	ZNF382	3.06095e-05	15.3725
component_383	Kidney	WHSC1	3.06095e-05	15.3725
component_383	Kidney	MEF2D	3.8097e-05	14.6915
component_383	Kidney	LYL1	3.28486e-06	13.6344
component_383	Kidney	RFXANK	1.0643e-08	13.4435
component_383	Kidney	RFXAP	1.0643e-08	13.4435
component_383	Kidney	HOXD3	8.87164e-10	13.0617
component_383	Kidney	NF1	7.43611e-05	12.9679
component_383	Kidney	ATRX	7.6127e-05	12.872
component_383	Kidney	MAL	0.000133767	11.5677
component_383	Kidney	ELF3	0.000145601	11.3416
component_383	Kidney	SP4	0.000145601	11.3232
component_383	Kidney	HOXC6	0.000166659	11.0186
component_383	Kidney	FOXF2	0.000169782	10.9493
component_383	Kidney	RFX1	8.68507e-08	10.8979
component_383	Kidney	HES1	0.000190138	10.697
component_383	Kidney	HEY1	1.38117e-05	10.5631
component_383	Kidney	RFX5	2.30785e-07	9.77369
component_383	Kidney	TFAP2B	0.000333795	9.60518
component_383	Kidney	PAX6	0.000381582	9.34732
component_383	Kidney	NANOG	3.29504e-07	9.30984
component_383	Kidney	TFCP2	0.000410155	9.19915
component_383	Kidney	GATA2	3.86612e-07	9.07921
component_383	Kidney	PPARD	3.55731e-05	9.06739
component_383	Kidney	VHL	8.48114e-07	8.36487
component_383	Kidney	POU5F1	0.000784568	8.09739
component_383	Kidney	DNMT1	8.76167e-06	8.02091
component_383	Kidney	TAL1	7.85843e-05	8.01814
component_383	Kidney	NR3C1	2.59494e-06	7.46784
component_383	Kidney	WT1	1.58674e-10	6.62426
component_383	Kidney	HSF1	9.44073e-06	6.22876
component_383	Kidney	FOSL1	0.00050507	5.9942
component_383	Kidney	CIITA	3.37166e-06	5.90435
component_383	Kidney	GATA1	1.33292e-09	5.76948
component_383	Kidney	FLI1	1.94886e-05	5.76948
component_383	Kidney	ESR1	2.91703e-07	5.54881
component_383	Kidney	JUND	1.68258e-06	5.46498
component_383	Kidney	ERG	3.667e-07	5.42208
component_383	Kidney	GATA3	3.86612e-07	5.36499
component_383	Kidney	KLF4	2.01677e-05	4.85183
component_383	Kidney	USF1	8.76167e-06	4.64483
component_383	Kidney	TWIST2	0.000215708	4.36462
component_383	Kidney	CREB1	1.94886e-05	4.28275
component_383	Kidney	E2F1	9.63508e-08	4.14111
component_383	Kidney	JUN	7.13642e-10	4.01369
component_383	Kidney	ETS1	8.68507e-08	3.92009
component_383	Kidney	STAT3	8.68507e-08	3.91537
component_383	Kidney	PPARA	0.000685268	3.82729
component_383	Kidney	YY1	2.46097e-05	3.78191
component_383	Kidney	SP3	4.78461e-06	3.43465
component_383	Kidney	TP53	0.000810772	2.79781
component_383	Kidney	SP1	5.18351e-05	2.00516
component_384	Kidney	PTMA	8.14755e-05	23.5886
component_384	Kidney	SLA2	8.14755e-05	22.6696
component_385	Large_Intestine,Heart	TP53	9.35466e-08	4.3753
component_385	Large_Intestine,Heart	ETS1	9.91249e-05	3.37795
component_387	Spleen,Liver,Thymus	SKI	2.89434e-09	31.1608
component_387	Spleen,Liver,Thymus	ZBTB14	2.89434e-09	31.1608
component_387	Spleen,Liver,Thymus	PCGF2	2.89434e-09	30.0034
component_387	Spleen,Liver,Thymus	HOXD1	2.89434e-09	29.8329
component_387	Spleen,Liver,Thymus	RORA	1.21803e-06	23.2034
component_387	Spleen,Liver,Thymus	DBP	6.28108e-08	20.631
component_387	Spleen,Liver,Thymus	FOXF2	3.75703e-07	16.5113
component_387	Spleen,Liver,Thymus	LYL1	5.99311e-07	15.4203
component_387	Spleen,Liver,Thymus	MTA1	3.72496e-13	15.2412
component_387	Spleen,Liver,Thymus	PAX6	1.05295e-06	14.0956
component_387	Spleen,Liver,Thymus	KLF10	4.49708e-06	11.5271
component_387	Spleen,Liver,Thymus	CREBBP	7.408e-07	10.401
component_387	Spleen,Liver,Thymus	CEBPE	0.00027419	9.47517
component_387	Spleen,Liver,Thymus	HSF1	5.96721e-10	9.39284
component_387	Spleen,Liver,Thymus	DNMT1	2.80419e-06	8.86994
component_387	Spleen,Liver,Thymus	HOXD3	5.43868e-05	8.44148
component_387	Spleen,Liver,Thymus	CDX1	7.27241e-05	8.07784
component_387	Spleen,Liver,Thymus	RB1	0.000115658	7.5657
component_387	Spleen,Liver,Thymus	NR1H4	0.000240468	6.80129
component_387	Spleen,Liver,Thymus	XBP1	0.000794772	5.71961
component_387	Spleen,Liver,Thymus	CIITA	0.000169936	5.08779
component_388	Heart,Lung,Kidney	SLA2	1.23299e-05	22.8311
component_388	Heart,Lung,Kidney	KLF13	1.23299e-05	22.0438
component_388	Heart,Lung,Kidney	SOX4	1.23299e-05	20.7433
component_388	Heart,Lung,Kidney	PAX2	1.23299e-05	20.7433
component_388	Heart,Lung,Kidney	PCGF2	1.23299e-05	20.0913
component_388	Heart,Lung,Kidney	XRCC5	1.23299e-05	19.9772
component_388	Heart,Lung,Kidney	ETV7	1.23299e-05	19.9772
component_388	Heart,Lung,Kidney	SP100	1.23299e-05	19.9772
component_388	Heart,Lung,Kidney	DDB2	1.23299e-05	19.9206
component_388	Heart,Lung,Kidney	PAWR	1.23299e-05	19.9206
component_388	Heart,Lung,Kidney	ATM	1.23299e-05	19.9206
component_388	Heart,Lung,Kidney	PER1	1.23299e-05	19.9206
component_388	Heart,Lung,Kidney	BACH2	1.23299e-05	19.9206
component_388	Heart,Lung,Kidney	SMAD2	1.23299e-05	19.9206
component_388	Heart,Lung,Kidney	SIM2	1.23299e-05	19.9206
component_388	Heart,Lung,Kidney	ERCC2	1.23299e-05	19.9206
component_388	Heart,Lung,Kidney	NAB2	1.27067e-05	19.6974
component_388	Heart,Lung,Kidney	GLI2	2.71404e-05	17.0679
component_388	Heart,Lung,Kidney	ZBTB16	1.3169e-08	16.0182
component_388	Heart,Lung,Kidney	TFAP4	3.45792e-05	16.0182
component_388	Heart,Lung,Kidney	ZNRD1	1.32955e-06	15.047
component_388	Heart,Lung,Kidney	ING2	8.06561e-05	13.7343
component_388	Heart,Lung,Kidney	IRF7	9.59001e-05	13.1932
component_388	Heart,Lung,Kidney	TBP	9.60329e-05	13.1193
component_388	Heart,Lung,Kidney	PGR	9.60329e-05	13.0706
component_388	Heart,Lung,Kidney	DEK	0.000141608	12.145
component_388	Heart,Lung,Kidney	NCOA3	0.000161044	11.8184
component_388	Heart,Lung,Kidney	AES	0.00022617	11.074
component_388	Heart,Lung,Kidney	MSX1	0.000264843	10.7195
component_388	Heart,Lung,Kidney	MSX2	0.000270101	10.6384
component_388	Heart,Lung,Kidney	IRF9	0.000309142	10.3411
component_388	Heart,Lung,Kidney	ABL1	0.000338639	10.1325
component_388	Heart,Lung,Kidney	PAX8	0.000406109	9.76662
component_388	Heart,Lung,Kidney	MYCN	1.23299e-05	9.48557
component_388	Heart,Lung,Kidney	TFCP2	0.000503241	9.28926
component_388	Heart,Lung,Kidney	CREM	1.88638e-06	8.72453
component_388	Heart,Lung,Kidney	PAX5	7.24011e-08	8.70293
component_388	Heart,Lung,Kidney	PITX2	3.02174e-05	8.23415
component_388	Heart,Lung,Kidney	ING4	0.000921666	8.22452
component_388	Heart,Lung,Kidney	NR1I2	3.40568e-05	8.08272
component_388	Heart,Lung,Kidney	NR3C1	5.98029e-06	7.54098
component_388	Heart,Lung,Kidney	IRF1	2.2563e-05	5.9117
component_388	Heart,Lung,Kidney	RUNX1	6.09508e-07	5.7924
component_388	Heart,Lung,Kidney	TCF4	0.000775372	5.10797
component_388	Heart,Lung,Kidney	CREB1	4.09562e-06	4.86529
component_388	Heart,Lung,Kidney	WT1	9.79777e-06	4.73815
component_388	Heart,Lung,Kidney	TFAP2A	8.45593e-06	4.55734
component_388	Heart,Lung,Kidney	GATA3	3.02174e-05	4.51462
component_388	Heart,Lung,Kidney	MYC	0.000413764	4.18445
component_388	Heart,Lung,Kidney	MYB	0.000482992	4.10746
component_388	Heart,Lung,Kidney	ETS1	7.24011e-08	4.09986
component_388	Heart,Lung,Kidney	TWIST1	0.000775372	3.87971
component_388	Heart,Lung,Kidney	NFKB1	1.88842e-06	2.42813
component_388	Heart,Lung,Kidney	RELA	8.98812e-05	2.13877
component_394	Spleen	XRCC5	4.32873e-05	20.3764
component_394	Spleen	ETV7	4.32873e-05	20.3764
component_394	Spleen	SP100	4.32873e-05	20.3764
component_394	Spleen	MAML1	4.70753e-05	19.2292
component_394	Spleen	NKX2-3	4.70753e-05	19.2292
component_394	Spleen	RARG	4.83549e-05	18.4858
component_394	Spleen	IFI16	4.83549e-05	18.4858
component_394	Spleen	EAPP	0.000374593	17.1755
component_394	Spleen	NFATC1	0.000136808	14.9739
component_394	Spleen	SFPQ	0.000311046	12.6276
component_394	Spleen	RBMX	0.00073154	10.5478
component_394	Spleen	ETV5	0.00073154	10.4861
component_394	Spleen	RARA	9.69494e-10	9.51257
component_394	Spleen	NR3C1	1.27682e-06	8.33264
component_394	Spleen	VHL	7.71622e-05	7.17966
component_394	Spleen	ERG	1.27682e-06	5.58459
component_394	Spleen	HDAC1	1.93093e-07	5.45258
component_394	Spleen	SIRT1	0.000146303	4.86854
component_398	Thymus,Lymph_Node	FOXP3	4.98267e-05	14.7184
component_398	Thymus,Lymph_Node	RARA	0.000100121	6.47102
component_398	Thymus,Lymph_Node	SIRT1	0.000100121	5.34994
component_398	Thymus,Lymph_Node	CEBPB	0.00047271	4.02653
component_401	Spleen	RFXANK	6.05321e-05	10.6559
component_401	Spleen	RFXAP	6.05321e-05	10.6559
component_401	Spleen	RFX5	0.000464514	7.747
component_401	Spleen	CIITA	0.000464514	5.34858
component_403	Lung,Heart,Liver	RFXANK	2.23774e-08	14.3821
component_403	Lung,Heart,Liver	RFXAP	2.23774e-08	14.3821
component_403	Lung,Heart,Liver	RFX5	3.92842e-07	10.456
component_403	Lung,Heart,Liver	BRCA1	1.74151e-05	8.12019
component_403	Lung,Heart,Liver	CREBBP	0.000475408	8.0496
component_403	Lung,Heart,Liver	RFX1	0.000549471	7.77246
component_403	Lung,Heart,Liver	XBP1	2.92444e-05	7.43909
component_403	Lung,Heart,Liver	CIITA	2.72575e-07	7.2189
component_403	Lung,Heart,Liver	RB1	0.000896655	7.15649
component_403	Lung,Heart,Liver	HSF1	2.92444e-05	6.6636
component_403	Lung,Heart,Liver	ETS1	3.05557e-05	3.44487
component_407	Spleen	HOPX	6.29007e-08	388.646
component_407	Spleen	RORC	0.000300357	114.827
component_407	Spleen	HAND2	5.32447e-12	39.6974
component_407	Spleen	PHOX2B	0.000360107	39.1659
component_407	Spleen	HEY2	0.000113663	14.5184
component_407	Spleen	NKX2-5	0.000494761	10.4265
component_407	Spleen	HEY1	0.000534318	10.0588
component_409	Kidney	TIAL1	0.000153548	42.5388
component_409	Kidney	PBX1	0.000153548	42.5388
component_409	Kidney	MEIS1	0.000153548	42.5388
component_409	Kidney	TRPS1	0.000153548	38.9393
component_409	Kidney	SRCAP	0.000153548	38.9393
component_409	Kidney	BTG2	0.000153548	38.9393
component_409	Kidney	FOXP1	0.000153548	38.9393
component_409	Kidney	SIN3A	0.000153548	38.9393
component_409	Kidney	AATF	0.000153548	38.9393
component_409	Kidney	FUS	0.000153548	38.9393
component_409	Kidney	RREB1	0.000153548	38.9393
component_409	Kidney	CITED2	0.000314129	31.8372
component_409	Kidney	NR2C2	0.0006437	25.5662
component_409	Kidney	SUGP1	0.0006437	25.5662
component_409	Kidney	HDAC9	0.000704373	24.5734
component_409	Kidney	NCOA4	0.000841401	23.1147
component_409	Kidney	RUNX2	2.73493e-05	10.6169
component_410	Kidney	FOXC1	3.62899e-05	73.4346
component_410	Kidney	BTG2	0.000122375	38.9768
component_410	Kidney	FOXP1	0.000122375	38.9768
component_410	Kidney	TRPS1	0.000122375	38.9768
component_410	Kidney	SRCAP	0.000122375	38.9768
component_410	Kidney	SIN3A	0.000122375	38.9768
component_410	Kidney	AATF	0.000122375	38.9768
component_410	Kidney	FUS	0.000122375	38.9768
component_410	Kidney	RREB1	0.000122375	38.9768
component_410	Kidney	NR2C2	5.10239e-06	38.3863
component_410	Kidney	CNOT7	5.10239e-06	33.9307
component_410	Kidney	CNOT8	5.10239e-06	33.9307
component_410	Kidney	NKX2-1	0.000673155	23.7887
component_410	Kidney	MYBBP1A	0.000673155	23.7887
component_410	Kidney	NCOA4	0.000712533	23.1369
component_410	Kidney	NR3C2	8.45282e-05	19.2417
component_410	Kidney	DBP	0.000122375	14.9322
component_410	Kidney	HOXA9	0.000664447	10.7808
component_410	Kidney	REL	0.000426263	5.6958
component_411	Kidney,Large_Intestine	CNOT8	0.000177699	28.3028
component_411	Kidney,Large_Intestine	CNOT7	0.000177699	28.3028
component_411	Kidney,Large_Intestine	HR	0.000193306	25.0586
component_411	Kidney,Large_Intestine	PLAG1	0.000263625	21.9371
component_411	Kidney,Large_Intestine	SUZ12	0.000263625	21.9371
component_411	Kidney,Large_Intestine	KHDRBS1	0.000675566	16.7721
component_411	Kidney,Large_Intestine	PLAGL2	0.00068379	16.382
component_411	Kidney,Large_Intestine	NR3C2	0.000691093	16.0502
component_411	Kidney,Large_Intestine	FOXD3	0.000466529	13.1396
component_411	Kidney,Large_Intestine	ERG	0.000177699	4.93629
component_411	Kidney,Large_Intestine	PPARA	0.000193306	4.87814
component_411	Kidney,Large_Intestine	CEBPA	0.000675566	3.45772
component_413	Thymus,Lung,Spleen	DDX5	4.79869e-06	17.9952
component_413	Thymus,Lung,Spleen	FOXF2	1.65466e-06	16.1358
component_413	Thymus,Lung,Spleen	TFAP2B	4.18463e-06	14.155
component_413	Thymus,Lung,Spleen	TFAP2C	0.00010709	13.5746
component_413	Thymus,Lung,Spleen	MKL1	3.16524e-05	12.9951
component_413	Thymus,Lung,Spleen	PAX6	4.29282e-05	12.0531
component_413	Thymus,Lung,Spleen	EZH2	0.000190195	12.045
component_413	Thymus,Lung,Spleen	HDAC5	0.000284711	11.0269
component_413	Thymus,Lung,Spleen	ATF4	8.57626e-07	9.98639
component_413	Thymus,Lung,Spleen	CTCF	3.09463e-08	9.78168
component_413	Thymus,Lung,Spleen	NR4A1	0.000689442	9.08711
component_413	Thymus,Lung,Spleen	SMAD4	9.20309e-07	8.61902
component_413	Thymus,Lung,Spleen	HOXD3	0.00011962	8.2495
component_413	Thymus,Lung,Spleen	MZF1	1.82073e-05	7.97759
component_413	Thymus,Lung,Spleen	TAL1	0.000511983	7.75439
component_413	Thymus,Lung,Spleen	ATF5	0.00055802	7.61627
component_413	Thymus,Lung,Spleen	FLI1	4.78311e-07	7.43959
component_413	Thymus,Lung,Spleen	NFIC	3.16524e-05	7.38513
component_413	Thymus,Lung,Spleen	PARP1	3.32628e-05	7.30107
component_413	Thymus,Lung,Spleen	FOSL2	0.000272012	7.25256
component_413	Thymus,Lung,Spleen	SRF	4.1098e-08	7.09881
component_413	Thymus,Lung,Spleen	EPAS1	0.000944155	6.88618
component_413	Thymus,Lung,Spleen	HDAC2	5.5534e-05	6.76581
component_413	Thymus,Lung,Spleen	FOSL1	0.000470319	6.62516
component_413	Thymus,Lung,Spleen	ERG	3.1712e-08	6.32576
component_413	Thymus,Lung,Spleen	VHL	0.000681081	6.16359
component_413	Thymus,Lung,Spleen	TP53	3.6127e-13	5.84105
component_413	Thymus,Lung,Spleen	HIF1A	2.72073e-07	5.74816
component_413	Thymus,Lung,Spleen	STAT3	6.42048e-13	5.40939
component_413	Thymus,Lung,Spleen	KLF4	1.53509e-05	5.36254
component_413	Thymus,Lung,Spleen	TWIST2	3.83316e-05	5.22606
component_413	Thymus,Lung,Spleen	TWIST1	3.16524e-05	4.95425
component_413	Thymus,Lung,Spleen	TFAP2A	6.44168e-06	4.71107
component_413	Thymus,Lung,Spleen	JUND	0.000278957	4.53018
component_413	Thymus,Lung,Spleen	ETS2	4.14855e-05	4.47279
component_413	Thymus,Lung,Spleen	RUNX1	0.000497197	4.22668
component_413	Thymus,Lung,Spleen	ESR1	0.000628979	4.0886
component_413	Thymus,Lung,Spleen	ETS1	2.44769e-07	4.02325
component_413	Thymus,Lung,Spleen	JUN	3.53887e-07	3.57359
component_413	Thymus,Lung,Spleen	SP3	0.000144342	3.1635
component_413	Thymus,Lung,Spleen	NFKB1	1.04914e-11	3.14584
component_413	Thymus,Lung,Spleen	RELA	7.30335e-10	2.93982
component_413	Thymus,Lung,Spleen	SP1	7.43798e-10	2.7038
component_415	Heart,Kidney,Spleen	NRF1	0.000688909	35.1794
component_415	Heart,Kidney,Spleen	TFDP1	0.000442112	17.917
component_415	Heart,Kidney,Spleen	PPARG	0.00097932	3.72458
component_417	Kidney	MEF2C	8.48623e-08	48.9639
component_417	Kidney	ATRX	1.7323e-12	28.962
component_417	Kidney	MEF2A	1.35703e-06	28.6968
component_417	Kidney	CEBPG	1.35703e-06	28.5921
component_417	Kidney	KLF1	1.35703e-06	28.5921
component_417	Kidney	ZNF24	2.18945e-06	26.0273
component_417	Kidney	ETV6	2.18945e-06	25.9411
component_417	Kidney	LMX1B	7.55921e-10	24.4973
component_417	Kidney	HIF3A	4.0439e-06	22.6423
component_417	Kidney	ILF3	4.0439e-06	22.5121
component_417	Kidney	XRCC5	4.0439e-06	22.2563
component_417	Kidney	ETV7	4.0439e-06	22.2563
component_417	Kidney	SP100	4.0439e-06	22.2563
component_417	Kidney	HOXD1	4.0439e-06	22.2563
component_417	Kidney	RORA	4.0439e-06	22.2563
component_417	Kidney	RFXANK	4.09445e-14	20.1653
component_417	Kidney	RFXAP	4.09445e-14	20.1653
component_417	Kidney	ASH1L	7.67963e-06	19.6347
component_417	Kidney	RFX5	2.83636e-16	18.3257
component_417	Kidney	HEY1	3.53272e-10	17.8253
component_417	Kidney	POU1F1	1.42963e-05	17.5655
component_417	Kidney	KLF11	0.000541826	17.5262
component_417	Kidney	POU2F2	4.13732e-10	17.4482
component_417	Kidney	TRIM28	1.47487e-05	17.2941
component_417	Kidney	ZNF382	1.47487e-05	17.2941
component_417	Kidney	WHSC1	1.47487e-05	17.2941
component_417	Kidney	LMO4	0.000562936	17.237
component_417	Kidney	LDB1	0.000562936	17.237
component_417	Kidney	MEF2D	1.8769e-05	16.5279
component_417	Kidney	ELF2	0.000644776	16.424
component_417	Kidney	RFX1	7.24424e-13	16.3468
component_417	Kidney	SOX17	0.0008038	15.4065
component_417	Kidney	BTF3	0.000821587	15.2714
component_417	Kidney	PCGF2	0.000876818	14.9223
component_417	Kidney	NF1	3.68727e-05	14.5889
component_417	Kidney	KLF5	3.68727e-05	14.5889
component_417	Kidney	MAL	6.68044e-05	13.0137
component_417	Kidney	HEY2	7.01112e-05	12.8641
component_417	Kidney	ELF3	7.05607e-05	12.7593
component_417	Kidney	SP4	7.05607e-05	12.7386
component_417	Kidney	FOSB	7.60522e-05	12.5348
component_417	Kidney	HOXC6	7.97167e-05	12.3959
component_417	Kidney	FOXF2	8.13391e-05	12.318
component_417	Kidney	EZH2	8.2269e-05	12.2601
component_417	Kidney	HES1	8.86664e-05	12.0341
component_417	Kidney	MKL1	0.000121966	11.3375
component_417	Kidney	TFAP2B	0.000157085	10.8058
component_417	Kidney	PAX6	0.00017814	10.5157
component_417	Kidney	HOXD3	1.08491e-06	10.496
component_417	Kidney	TFCP2	0.000191473	10.349
component_417	Kidney	GATA2	9.23069e-08	10.2141
component_417	Kidney	TAL1	4.0439e-06	10.148
component_417	Kidney	HDAC7	7.05607e-05	9.81733
component_417	Kidney	PTTG1	8.24909e-05	9.44208
component_417	Kidney	KLF4	5.14438e-14	9.35709
component_417	Kidney	NANOG	4.0439e-06	8.72797
component_417	Kidney	ATF2	4.33804e-06	8.51176
component_417	Kidney	NR3C1	6.78391e-07	8.40131
component_417	Kidney	HSF1	8.48623e-08	8.17525
component_417	Kidney	NFYC	0.000643932	8.13523
component_417	Kidney	NFYA	0.000643932	8.13523
component_417	Kidney	GATA1	1.74579e-15	8.11332
component_417	Kidney	FLI1	3.25809e-08	8.11332
component_417	Kidney	PPARD	0.000844353	7.65061
component_417	Kidney	CIITA	2.51374e-08	7.5913
component_417	Kidney	HOXA1	0.000929493	7.48255
component_417	Kidney	WT1	4.45256e-12	7.4523
component_417	Kidney	VHL	5.87909e-05	7.05786
component_417	Kidney	ERG	1.70206e-09	6.7776
component_417	Kidney	TWIST2	1.37817e-07	6.54694
component_417	Kidney	ESR1	4.28744e-08	6.24241
component_417	Kidney	JUND	3.12753e-07	6.14811
component_417	Kidney	TWIST1	6.93924e-07	5.76311
component_417	Kidney	RUNX1	7.11706e-07	5.73621
component_417	Kidney	XBP1	0.000603588	5.68934
component_417	Kidney	STAT3	4.09445e-14	5.6633
component_417	Kidney	HDAC2	0.000714771	5.5093
component_417	Kidney	YY1	2.41385e-08	5.20013
component_417	Kidney	SRF	5.22132e-05	5.10041
component_417	Kidney	GATA3	5.40682e-06	5.02968
component_417	Kidney	CREB1	4.19897e-06	4.8181
component_417	Kidney	JUN	1.004e-11	4.5154
component_417	Kidney	SP3	5.20648e-08	4.18598
component_417	Kidney	E2F1	1.44197e-06	3.94202
component_417	Kidney	USF1	0.000491145	3.91907
component_417	Kidney	ETS1	2.87472e-06	3.62258
component_417	Kidney	TP53	0.00017814	3.14754
component_417	Kidney	SP1	2.87472e-06	2.2558
component_417	Kidney	NFKB1	0.000234683	2.09787
component_420	Kidney,Liver	MYCN	0.000125474	10.6099
component_421	Spleen	RBPJ	3.26634e-06	36.5963
component_421	Spleen	ARID3A	3.26634e-06	36.5963
component_421	Spleen	SLA2	9.24428e-06	25.665
component_421	Spleen	PCGF2	9.24428e-06	22.5852
component_421	Spleen	ZBTB7A	9.24428e-06	22.5852
component_421	Spleen	GFI1B	9.24428e-06	22.5208
component_421	Spleen	DDB2	9.24428e-06	22.3932
component_421	Spleen	PAWR	9.24428e-06	22.3932
component_421	Spleen	ATM	9.24428e-06	22.3932
component_421	Spleen	PER1	9.24428e-06	22.3932
component_421	Spleen	BACH2	9.24428e-06	22.3932
component_421	Spleen	SMAD2	9.24428e-06	22.3932
component_421	Spleen	SIM2	9.24428e-06	22.3932
component_421	Spleen	ERCC2	9.24428e-06	22.3932
component_421	Spleen	SALL3	9.37665e-06	22.1423
component_421	Spleen	ISL1	1.06515e-05	21.4804
component_421	Spleen	GLI2	1.95485e-05	19.1864
component_421	Spleen	MTF1	0.000211496	16.9777
component_421	Spleen	ING2	6.50478e-05	15.4391
component_421	Spleen	TBP	7.93339e-05	14.7478
component_421	Spleen	PGR	7.93339e-05	14.6929
component_421	Spleen	DEK	0.000115673	13.6525
component_421	Spleen	NCOA3	0.000129932	13.2854
component_421	Spleen	MSX1	0.000211496	12.05
component_421	Spleen	MSX2	0.000211496	11.9589
component_421	Spleen	ABL1	0.00025879	11.3902
component_421	Spleen	WWP1	0.00025879	11.3575
component_421	Spleen	HIPK2	0.00025879	11.3087
component_421	Spleen	ZNRD1	0.00025879	11.2765
component_421	Spleen	SMAD7	0.000352612	10.6105
component_421	Spleen	CUX1	0.000420468	10.2261
component_421	Spleen	RB1	9.24428e-06	9.49184
component_421	Spleen	NKX2-5	0.00068083	9.3217
component_421	Spleen	ING4	0.000693422	9.24539
component_421	Spleen	ZBTB16	0.00078109	9.00319
component_421	Spleen	SATB1	7.22968e-06	7.99272
component_421	Spleen	XBP1	9.24428e-06	7.89332
component_421	Spleen	PAX5	7.23564e-06	7.82654
component_421	Spleen	ETS1	1.28388e-06	4.13198
component_424	Large_Intestine	HOXA1	0.000109011	10.2097
component_424	Large_Intestine	RB1	1.11597e-05	9.62675
component_424	Large_Intestine	USF2	1.89597e-10	8.91092
component_424	Large_Intestine	ATF1	3.24873e-06	8.43467
component_424	Large_Intestine	CDX1	0.000408066	8.22273
component_424	Large_Intestine	TWIST1	2.74753e-09	7.3721
component_424	Large_Intestine	NR3C1	0.000117728	7.16457
component_424	Large_Intestine	TWIST2	7.6705e-07	6.69981
component_424	Large_Intestine	YY1	1.70416e-06	4.83777
component_426	Kidney	TRPS1	5.2071e-08	62.0484
component_426	Kidney	SRCAP	5.2071e-08	62.0484
component_426	Kidney	BTG2	5.2071e-08	62.0484
component_426	Kidney	FOXP1	5.2071e-08	62.0484
component_426	Kidney	SIN3A	5.2071e-08	62.0484
component_426	Kidney	AATF	5.2071e-08	62.0484
component_426	Kidney	FUS	5.2071e-08	62.0484
component_426	Kidney	RREB1	5.2071e-08	62.0484
component_426	Kidney	TSG101	0.000893269	49.7919
component_426	Kidney	MEF2C	7.61361e-06	42.0119
component_426	Kidney	NCOA4	1.04914e-06	36.8324
component_426	Kidney	ASXL1	6.51556e-05	25.7544
component_426	Kidney	MEF2A	7.53212e-05	24.6224
component_426	Kidney	NKX3-1	1.98716e-05	21.5676
component_426	Kidney	PA2G4	4.19364e-05	18.672
component_426	Kidney	PGR	0.000117887	14.9931
component_426	Kidney	MEF2D	0.000893269	14.1812
component_426	Kidney	EP300	0.000912627	4.64892
component_429	Pancreas	NRF1	0.000742948	37.1358
component_431	Lung	SPI1	8.55464e-11	6.19396
component_431	Lung	ETS2	0.0001756	4.74569
component_431	Lung	CEBPA	3.70672e-06	4.58492
component_432	Kidney	CEBPG	1.17161e-06	29.8352
component_432	Kidney	KLF1	1.17161e-06	29.8352
component_432	Kidney	PLAG1	1.49588e-06	28.2867
component_432	Kidney	SUZ12	1.49588e-06	28.2867
component_432	Kidney	KLF11	1.73308e-06	27.4324
component_432	Kidney	ZNF24	1.76044e-06	27.159
component_432	Kidney	ETV6	1.76044e-06	27.069
component_432	Kidney	FOXF2	1.1221e-11	25.7071
component_432	Kidney	SOX17	3.17221e-06	24.1146
component_432	Kidney	BTF3	3.24923e-06	23.9031
component_432	Kidney	HIF3A	3.38563e-06	23.6267
component_432	Kidney	ILF3	3.4115e-06	23.4909
component_432	Kidney	HOXD1	3.46849e-06	23.224
component_432	Kidney	RORA	3.46849e-06	23.224
component_432	Kidney	KHDRBS1	5.00503e-06	21.6266
component_432	Kidney	PLAGL2	5.60672e-06	21.1236
component_432	Kidney	ASH1L	6.54318e-06	20.4883
component_432	Kidney	LMX1B	1.92637e-07	20.4499
component_432	Kidney	ATRX	2.06252e-07	20.1475
component_432	Kidney	RFX1	3.57884e-15	19.1898
component_432	Kidney	TFDP1	9.45245e-06	19.0113
component_432	Kidney	POU2F2	3.38777e-10	18.2068
component_432	Kidney	TRIM28	1.15572e-05	18.046
component_432	Kidney	ZNF382	1.15572e-05	18.046
component_432	Kidney	WHSC1	1.15572e-05	18.046
component_432	Kidney	RFX5	1.1634e-14	17.2102
component_432	Kidney	DDX5	1.93953e-05	16.3825
component_432	Kidney	PPARD	1.16121e-09	15.9665
component_432	Kidney	RFXANK	1.16121e-09	15.7816
component_432	Kidney	RFXAP	1.16121e-09	15.7816
component_432	Kidney	GFI1B	0.000780653	15.5268
component_432	Kidney	CEBPZ	2.7752e-05	15.3374
component_432	Kidney	KLF5	2.84513e-05	15.2232
component_432	Kidney	ISL1	0.000923858	14.8095
component_432	Kidney	HDAC7	7.62649e-08	14.6345
component_432	Kidney	HOXA5	5.00444e-05	13.7392
component_432	Kidney	MAL	5.25594e-05	13.5795
component_432	Kidney	HEY2	5.51714e-05	13.4234
component_432	Kidney	ELF3	5.68306e-05	13.3141
component_432	Kidney	FOSB	6.18036e-05	13.0798
component_432	Kidney	MBD1	6.76996e-05	12.8334
component_432	Kidney	EZH2	6.78279e-05	12.7932
component_432	Kidney	ASCL1	7.80719e-05	12.4427
component_432	Kidney	HEY1	4.30647e-06	12.4002
component_432	Kidney	MKL1	0.000102018	11.8305
component_432	Kidney	HDAC5	0.000106321	11.7118
component_432	Kidney	PTTG1	8.05649e-06	11.2601
component_432	Kidney	PAX6	0.000143983	10.9729
component_432	Kidney	TFCP2	0.000153345	10.799
component_432	Kidney	SNAI2	0.000186313	10.4006
component_432	Kidney	VHL	1.5618e-07	9.81963
component_432	Kidney	FLI1	2.10784e-09	9.03048
component_432	Kidney	SNAI1	0.000385631	9.00313
component_432	Kidney	CIITA	3.38777e-10	8.91153
component_432	Kidney	EGR2	0.000413935	8.86643
component_432	Kidney	NFYC	0.000505381	8.48894
component_432	Kidney	NFYA	0.000505381	8.48894
component_432	Kidney	KLF4	1.60123e-10	8.1366
component_432	Kidney	SRF	1.16121e-09	7.98325
component_432	Kidney	HOXA1	0.000780653	7.80787
component_432	Kidney	PARP1	9.55487e-06	7.75455
component_432	Kidney	HOXD3	0.000274778	7.66666
component_432	Kidney	HSF1	2.18511e-06	7.31203
component_432	Kidney	SOX2	0.000125943	7.3006
component_432	Kidney	ATF2	0.000143983	7.10547
component_432	Kidney	GATA2	0.000143983	7.10547
component_432	Kidney	STAT3	3.68731e-19	6.89445
component_432	Kidney	TWIST1	1.30223e-08	6.76539
component_432	Kidney	TWIST2	2.31491e-06	5.97764
component_432	Kidney	NR3C1	0.00049619	5.84439
component_432	Kidney	WT1	1.14337e-07	5.83223
component_432	Kidney	ERG	8.86996e-07	5.65782
component_432	Kidney	RUNX1	8.14309e-06	5.23741
component_432	Kidney	JUN	1.1634e-14	5.23525
component_432	Kidney	GATA1	6.88044e-07	5.07965
component_432	Kidney	YY1	2.15578e-07	4.93293
component_432	Kidney	PPARA	0.000143983	4.49291
component_432	Kidney	ESR1	0.00018937	4.34255
component_432	Kidney	TP53	3.24859e-07	4.19672
component_432	Kidney	HIF1A	0.00034033	4.07012
component_432	Kidney	CEBPA	1.23332e-05	3.934
component_432	Kidney	SP3	1.02755e-05	3.52798
component_432	Kidney	NFKB1	3.56038e-10	2.99559
component_432	Kidney	ETS1	0.000363385	2.95833
component_432	Kidney	RELA	2.02047e-09	2.89113
component_432	Kidney	SP1	3.38777e-10	2.77758
component_436	Kidney,Lung,Heart	SPIC	0.000727421	41.362
component_436	Kidney,Lung,Heart	IRF2	0.000727421	41.362
component_439	Heart,Large_Intestine,Lung	TRIM16	1.76481e-13	59.964
component_439	Heart,Large_Intestine,Lung	PLAG1	1.52716e-09	39.0077
component_439	Heart,Large_Intestine,Lung	SUZ12	1.52716e-09	39.0077
component_439	Heart,Large_Intestine,Lung	TFAP2B	9.70922e-20	34.9859
component_439	Heart,Large_Intestine,Lung	DLX5	5.05894e-08	33.2124
component_439	Heart,Large_Intestine,Lung	PLAGL2	5.10248e-10	32.771
component_439	Heart,Large_Intestine,Lung	RORA	6.83586e-09	32.0262
component_439	Heart,Large_Intestine,Lung	MEF2A	5.73108e-07	30.9704
component_439	Heart,Large_Intestine,Lung	KHDRBS1	1.02519e-08	29.8234
component_439	Heart,Large_Intestine,Lung	MTF1	1.20074e-08	29.0547
component_439	Heart,Large_Intestine,Lung	ASH1L	1.42945e-08	28.2537
component_439	Heart,Large_Intestine,Lung	DDX5	6.94464e-08	22.5917
component_439	Heart,Large_Intestine,Lung	CTNNBIP1	9.71968e-08	21.432
component_439	Heart,Large_Intestine,Lung	FOXM1	1.60903e-07	19.988
component_439	Heart,Large_Intestine,Lung	TFAP2C	1.62203e-07	19.8822
component_439	Heart,Large_Intestine,Lung	HOXA5	2.20709e-07	18.9466
component_439	Heart,Large_Intestine,Lung	MAL	2.2764e-07	18.7263
component_439	Heart,Large_Intestine,Lung	FOSB	2.94993e-07	18.0372
component_439	Heart,Large_Intestine,Lung	KLF3	3.14698e-07	17.8092
component_439	Heart,Large_Intestine,Lung	FOXF2	3.14698e-07	17.7252
component_439	Heart,Large_Intestine,Lung	MBD1	3.14698e-07	17.6974
component_439	Heart,Large_Intestine,Lung	HES1	3.53744e-07	17.3168
component_439	Heart,Large_Intestine,Lung	ASCL1	3.70381e-07	17.1587
component_439	Heart,Large_Intestine,Lung	DNMT3A	2.25823e-06	17.0955
component_439	Heart,Large_Intestine,Lung	JUNB	4.05966e-07	16.9014
component_439	Heart,Large_Intestine,Lung	HDAC5	5.6076e-07	16.1508
component_439	Heart,Large_Intestine,Lung	FOSL2	7.15935e-13	15.9339
component_439	Heart,Large_Intestine,Lung	CTNNB1	5.97597e-07	15.8778
component_439	Heart,Large_Intestine,Lung	HOXC6	3.91271e-06	15.6077
component_439	Heart,Large_Intestine,Lung	NCOR1	3.92308e-06	15.5585
component_439	Heart,Large_Intestine,Lung	SNAI2	1.26389e-06	14.3425
component_439	Heart,Large_Intestine,Lung	ATF4	1.31735e-10	13.9619
component_439	Heart,Large_Intestine,Lung	MAZ	2.56887e-06	12.9132
component_439	Heart,Large_Intestine,Lung	CTCF	2.86654e-11	12.2802
component_439	Heart,Large_Intestine,Lung	EGR2	3.79073e-06	12.2269
component_439	Heart,Large_Intestine,Lung	GLI1	6.94085e-08	11.9512
component_439	Heart,Large_Intestine,Lung	PTTG1	5.1545e-06	11.6459
component_439	Heart,Large_Intestine,Lung	RELB	0.000132883	11.0812
component_439	Heart,Large_Intestine,Lung	PPARD	7.54976e-06	11.009
component_439	Heart,Large_Intestine,Lung	SRF	1.98107e-14	10.5503
component_439	Heart,Large_Intestine,Lung	MYCN	1.33929e-05	10.1378
component_439	Heart,Large_Intestine,Lung	TAL1	1.77245e-05	9.73509
component_439	Heart,Large_Intestine,Lung	HOXB7	1.85688e-05	9.65174
component_439	Heart,Large_Intestine,Lung	KLF8	1.96889e-05	9.55359
component_439	Heart,Large_Intestine,Lung	HMGA1	1.73652e-06	9.37561
component_439	Heart,Large_Intestine,Lung	RUNX1	5.99144e-14	9.28602
component_439	Heart,Large_Intestine,Lung	CREBBP	2.6426e-05	9.13552
component_439	Heart,Large_Intestine,Lung	MECP2	0.000105621	9.04132
component_439	Heart,Large_Intestine,Lung	FOS	7.78729e-09	8.9489
component_439	Heart,Large_Intestine,Lung	STAT4	3.50925e-05	8.76612
component_439	Heart,Large_Intestine,Lung	FLI1	9.92369e-09	8.75614
component_439	Heart,Large_Intestine,Lung	JUND	6.31952e-12	8.70872
component_439	Heart,Large_Intestine,Lung	CDX1	3.73799e-05	8.67172
component_439	Heart,Large_Intestine,Lung	EPAS1	3.76557e-05	8.64512
component_439	Heart,Large_Intestine,Lung	WT1	7.15935e-13	8.04273
component_439	Heart,Large_Intestine,Lung	ATF1	1.1819e-05	7.4127
component_439	Heart,Large_Intestine,Lung	NR1H4	0.000120504	7.30132
component_439	Heart,Large_Intestine,Lung	FOSL1	0.000121575	7.27775
component_439	Heart,Large_Intestine,Lung	IRF1	1.99938e-06	7.10797
component_439	Heart,Large_Intestine,Lung	MZF1	0.000153914	7.01072
component_439	Heart,Large_Intestine,Lung	TP53	2.18197e-17	6.98255
component_439	Heart,Large_Intestine,Lung	EP300	2.24575e-07	6.64486
component_439	Heart,Large_Intestine,Lung	USF1	2.48956e-08	6.34437
component_439	Heart,Large_Intestine,Lung	MITF	0.000368498	6.16024
component_439	Heart,Large_Intestine,Lung	XBP1	0.000372002	6.14011
component_439	Heart,Large_Intestine,Lung	STAT3	6.99566e-14	5.77244
component_439	Heart,Large_Intestine,Lung	HIF1A	5.69282e-07	5.61276
component_439	Heart,Large_Intestine,Lung	PAX5	0.000696014	5.58081
component_439	Heart,Large_Intestine,Lung	TFAP2A	1.73535e-07	5.47954
component_439	Heart,Large_Intestine,Lung	RUNX3	0.000834803	5.42243
component_439	Heart,Large_Intestine,Lung	ESR1	6.66715e-06	5.23988
component_439	Heart,Large_Intestine,Lung	AR	8.68565e-08	5.15136
component_439	Heart,Large_Intestine,Lung	USF2	0.000431069	4.69875
component_439	Heart,Large_Intestine,Lung	KLF4	0.000227529	4.62846
component_439	Heart,Large_Intestine,Lung	EGR1	3.14698e-07	4.25201
component_439	Heart,Large_Intestine,Lung	SP1	5.7339e-21	3.84656
component_439	Heart,Large_Intestine,Lung	NFKB1	4.30078e-17	3.81319
component_439	Heart,Large_Intestine,Lung	CEBPA	0.000100571	3.61669
component_439	Heart,Large_Intestine,Lung	RELA	7.15935e-13	3.34901
component_439	Heart,Large_Intestine,Lung	JUN	1.99939e-05	3.1134
component_442	Kidney	HNF1B	3.38047e-06	20.9338
component_442	Kidney	TCF7L2	7.82824e-06	16.8091
component_442	Kidney	MYCN	0.00012774	10.2033
component_442	Kidney	HIF1A	7.82824e-06	5.64905
component_442	Kidney	MYC	0.000354248	5.06373
component_442	Kidney	HDAC1	3.57422e-05	4.92881
component_442	Kidney	ESR1	0.000965546	4.52037
component_442	Kidney	TP53	6.0336e-05	3.79875
component_442	Kidney	RELA	0.000277239	2.28723
component_442	Kidney	NFKB1	0.000277239	2.27872
component_444	Lung,Heart	PAX6	0.000993787	11.4841
component_444	Lung,Heart	YBX1	0.00021331	8.04106
component_444	Lung,Heart	MZF1	0.00021331	7.98105
component_444	Lung,Heart	SMAD4	0.000422248	7.18563
component_444	Lung,Heart	SRF	0.00021331	5.57011
component_444	Lung,Heart	TWIST1	0.000180418	5.50711
component_444	Lung,Heart	AR	0.00021331	4.1702
component_444	Lung,Heart	STAT3	0.000180418	3.60782
component_446	Kidney	NR2F1	6.56587e-06	19.2047
component_446	Kidney	TCF3	0.000165519	10.8231
component_446	Kidney	HNF4A	0.00010302	6.63232
component_448	Liver,Spleen	NR2F1	6.99609e-08	21.7466
component_448	Liver,Spleen	NR2F6	0.000201502	19.5542
component_448	Liver,Spleen	DDX5	6.09397e-05	17.2579
component_448	Liver,Spleen	PPARGC1A	1.72959e-06	14.3687
component_448	Liver,Spleen	JUNB	0.000229105	12.911
component_448	Liver,Spleen	HDAC5	0.000266175	12.3376
component_448	Liver,Spleen	HNF4A	2.26528e-09	9.45726
component_448	Liver,Spleen	TAL1	0.000400063	8.67612
component_448	Liver,Spleen	FOXA2	2.39529e-05	8.45774
component_448	Liver,Spleen	NR1H4	6.25458e-05	8.36626
component_448	Liver,Spleen	ATF4	0.000229105	8.12613
component_448	Liver,Spleen	RXRA	0.000603093	8.07632
component_448	Liver,Spleen	FLI1	1.72959e-06	7.72934
component_448	Liver,Spleen	ERG	2.26528e-09	7.45018
component_448	Liver,Spleen	HNF1A	0.000364529	7.33688
component_448	Liver,Spleen	HDAC2	0.000236715	6.81303
component_448	Liver,Spleen	CTCF	0.000970475	6.25393
component_448	Liver,Spleen	VDR	0.000364529	5.55663
component_448	Liver,Spleen	CEBPB	5.75307e-06	5.03399
component_448	Liver,Spleen	HDAC1	5.2338e-05	4.67619
component_448	Liver,Spleen	ETS2	0.000324596	4.3372
component_448	Liver,Spleen	CEBPA	2.95979e-05	4.14421
component_448	Liver,Spleen	STAT3	2.95979e-05	3.63143
component_448	Liver,Spleen	JUN	6.31656e-05	3.17112
component_448	Liver,Spleen	RELA	5.0352e-08	2.86288
component_448	Liver,Spleen	NFKB1	1.72959e-06	2.60949
component_449	Kidney	RB1	3.37675e-05	10.3746
component_449	Kidney	PAX5	0.00049148	7.12866
component_450	Heart,Liver	HNF1A	9.49968e-05	9.26201
component_451	Kidney	SPIC	1.45028e-07	65.9724
component_451	Kidney	IRF2	1.45028e-07	65.9724
component_451	Kidney	GFI1	0.00018481	44.3148
component_451	Kidney	GCM1	9.43223e-07	43.0114
component_451	Kidney	RBPJ	0.000703059	27.0813
component_451	Kidney	ARID3A	0.000703059	27.0813
component_451	Kidney	NR5A2	0.000221978	15.3397
component_451	Kidney	MAF	0.000345262	13.8615
component_451	Kidney	JUNB	0.000412404	13.1549
component_451	Kidney	SATB1	0.000142626	7.39327
component_452	Kidney	FOXC1	8.21008e-05	84.7762
component_457	Kidney	TEF	1.95028e-06	33.8632
component_457	Kidney	HNF1B	2.88315e-12	33.1135
component_457	Kidney	PIAS3	5.1557e-06	27.1932
component_457	Kidney	PIAS4	5.1557e-06	27.1932
component_457	Kidney	PCBD1	5.1557e-06	27.1932
component_457	Kidney	NFIB	6.23524e-06	25.9357
component_457	Kidney	RORA	6.35932e-06	25.4936
component_457	Kidney	MAML1	7.25168e-06	24.0583
component_457	Kidney	NKX2-3	7.25168e-06	24.0583
component_457	Kidney	PIAS1	1.78142e-05	20.3949
component_457	Kidney	DBP	3.8957e-05	17.6302
component_457	Kidney	PIAS2	3.90367e-05	17.4587
component_457	Kidney	FOXM1	6.00824e-05	15.9109
component_457	Kidney	HTATIP2	6.21502e-05	15.6884
component_457	Kidney	FOXD3	6.37165e-05	15.4987
component_457	Kidney	JUNB	0.000116787	13.4539
component_457	Kidney	RBMX	0.000125628	13.1967
component_457	Kidney	AHR	0.000125628	13.1195
component_457	Kidney	WWP1	0.000129897	12.8933
component_457	Kidney	TFAP2B	0.000158442	12.3776
component_457	Kidney	TFCP2	0.00019588	11.8544
component_457	Kidney	RELB	0.000198871	11.7611
component_457	Kidney	HNF1A	1.12797e-07	11.4681
component_457	Kidney	BRCA1	2.08618e-07	10.6703
component_457	Kidney	ING4	0.000364229	10.4956
component_457	Kidney	POU5F1	0.000366007	10.4346
component_457	Kidney	POU2F2	0.000443588	9.99304
component_457	Kidney	PPARGC1A	0.000443588	9.98192
component_457	Kidney	FOXO1	0.000663923	9.23225
component_457	Kidney	PPARD	0.000860659	8.76343
component_457	Kidney	HOXA1	0.000947913	8.57092
component_457	Kidney	MYC	3.82058e-09	8.00989
component_457	Kidney	HSF1	7.13644e-05	6.68884
component_457	Kidney	USF2	6.35932e-06	6.4832
component_457	Kidney	HDAC1	2.95819e-07	5.84736
component_457	Kidney	POU2F1	0.000116787	5.06562
component_457	Kidney	PPARA	0.000129897	4.93199
component_457	Kidney	USF1	8.22039e-05	4.86321
component_457	Kidney	TP53	8.34735e-05	3.60536
component_457	Kidney	RELA	1.43634e-09	3.1102
component_457	Kidney	NFKB1	1.43634e-09	3.09863
component_457	Kidney	SP1	5.52368e-05	2.22217
component_458	Kidney	TIAL1	0.000217918	50.6182
component_458	Kidney	PBX1	0.000217918	50.6182
component_458	Kidney	MEIS1	0.000217918	50.6182
component_459	Heart,Large_Intestine,Lung	ELF2	2.42011e-06	28.4456
component_459	Heart,Large_Intestine,Lung	TRIM28	5.23979e-08	26.6246
component_459	Heart,Large_Intestine,Lung	ZNF382	5.23979e-08	26.6246
component_459	Heart,Large_Intestine,Lung	WHSC1	5.23979e-08	26.6246
component_459	Heart,Large_Intestine,Lung	PTTG1	1.6071e-12	21.8044
component_459	Heart,Large_Intestine,Lung	XRCC5	7.1743e-05	21.415
component_459	Heart,Large_Intestine,Lung	ETV7	7.1743e-05	21.415
component_459	Heart,Large_Intestine,Lung	SP100	7.1743e-05	21.415
component_459	Heart,Large_Intestine,Lung	ELK1	4.33093e-06	17.9784
component_459	Heart,Large_Intestine,Lung	LYL1	8.14782e-07	17.7106
component_459	Heart,Large_Intestine,Lung	TFDP1	0.00016521	17.5304
component_459	Heart,Large_Intestine,Lung	NANOG	1.75755e-13	17.132
component_459	Heart,Large_Intestine,Lung	FOXO1	6.09437e-08	15.5105
component_459	Heart,Large_Intestine,Lung	SP4	7.1743e-05	14.7085
component_459	Heart,Large_Intestine,Lung	GATA6	1.35639e-09	14.1
component_459	Heart,Large_Intestine,Lung	MZF1	6.89016e-10	13.126
component_459	Heart,Large_Intestine,Lung	LMO2	1.0592e-05	12.0609
component_459	Heart,Large_Intestine,Lung	ERG	1.44609e-19	11.7385
component_459	Heart,Large_Intestine,Lung	ELF1	5.59298e-08	11.3782
component_459	Heart,Large_Intestine,Lung	TAL1	2.86422e-05	10.4153
component_459	Heart,Large_Intestine,Lung	HEY1	0.000417754	10.2909
component_459	Heart,Large_Intestine,Lung	ATF5	3.13232e-05	10.2298
component_459	Heart,Large_Intestine,Lung	EPAS1	6.2776e-05	9.24919
component_459	Heart,Large_Intestine,Lung	FLI1	6.09437e-08	8.74343
component_459	Heart,Large_Intestine,Lung	NFIL3	0.000153462	7.92961
component_459	Heart,Large_Intestine,Lung	GATA2	0.000157974	7.86241
component_459	Heart,Large_Intestine,Lung	ETS2	4.33403e-11	7.70981
component_459	Heart,Large_Intestine,Lung	NFIC	0.000358154	6.94355
component_459	Heart,Large_Intestine,Lung	POU2F1	1.30464e-07	6.80832
component_459	Heart,Large_Intestine,Lung	ATF3	0.000545265	6.48438
component_459	Heart,Large_Intestine,Lung	ATF1	0.000617079	6.34452
component_459	Heart,Large_Intestine,Lung	ESR1	8.60778e-06	5.60601
component_459	Heart,Large_Intestine,Lung	CREB1	1.68908e-06	5.56316
component_459	Heart,Large_Intestine,Lung	ETS1	2.35685e-11	5.45579
component_459	Heart,Large_Intestine,Lung	GATA3	1.16107e-05	5.4203
component_459	Heart,Large_Intestine,Lung	WT1	0.000107217	4.66089
component_459	Heart,Large_Intestine,Lung	TP53	1.67816e-06	4.23998
component_460	Kidney	TIAL1	4.03181e-08	76.2764
component_460	Kidney	PBX1	4.03181e-08	76.2764
component_460	Kidney	MEIS1	4.03181e-08	76.2764
component_460	Kidney	PAX4	1.37923e-07	59.3261
component_460	Kidney	CITED2	1.39041e-07	57.0874
component_460	Kidney	HDAC9	5.45582e-07	44.0626
component_460	Kidney	HDAC4	3.39817e-05	20.4435
component_460	Kidney	MED1	3.39817e-05	20.2158
component_460	Kidney	PKNOX1	3.39817e-05	19.9932
component_460	Kidney	PBX2	3.39817e-05	19.9932
component_460	Kidney	ING2	6.17553e-05	17.7283
component_460	Kidney	CEBPZ	7.12904e-05	17.0298
component_460	Kidney	MAF	0.000175383	14.3395
component_462	Kidney	TSG101	0.000129275	75.8402
component_462	Kidney	GFI1	0.000304798	46.5383
component_462	Kidney	PAX4	0.000410754	40.1507
component_462	Kidney	LRF	0.00080457	29.2527
component_462	Kidney	FOXQ1	0.00080457	29.114
component_462	Kidney	HMGB2	0.00080457	27.5473
component_462	Kidney	LRRFIP1	0.00080457	27.5473
component_462	Kidney	IRF5	0.00080457	27.5473
component_462	Kidney	HDAC11	0.000817125	26.7089
component_462	Kidney	MYOCD	0.000935541	25.1765
component_462	Kidney	RUNX2	0.000304798	10.3071
component_463	Thymus	WWP1	0.000624804	13.1321
component_463	Thymus	TAL1	0.000462472	10.5238
component_463	Thymus	EPAS1	0.000462472	9.34553
component_463	Thymus	GATA6	0.000462472	8.76732
component_463	Thymus	ERG	0.000462472	5.13968
component_463	Thymus	STAT3	0.000462472	3.48712
component_463	Thymus	ETS1	0.000969049	3.30757
component_465	Kidney	THRB	3.52296e-07	56.9676
component_465	Kidney	DLX3	3.52296e-07	56.9676
component_465	Kidney	THRA	2.57228e-05	23.6386
component_465	Kidney	POU1F1	4.12522e-05	20.5645
component_465	Kidney	TBP	0.000104053	17.1115
component_465	Kidney	ELF4	0.00020652	14.8651
component_465	Kidney	MSX1	0.000263137	13.9814
component_465	Kidney	TFCP2	0.000535843	12.116
component_465	Kidney	CREB1	7.94186e-06	5.6407
component_468	Kidney	PHOX2B	0.000807905	48.0128
component_469	Heart,Lung,Liver	NR2F6	4.1112e-05	25.5248
component_469	Heart,Lung,Liver	NR2F1	0.000331915	15.7704
component_469	Heart,Lung,Liver	ESR1	0.00075478	4.97616
component_469	Heart,Lung,Liver	RELA	3.10447e-07	2.91541
component_469	Heart,Lung,Liver	NFKB1	9.83058e-05	2.50849
component_472	Lung	PTTG1	4.24521e-05	12.9955
component_472	Lung	ELF1	0.000132374	8.90072
component_472	Lung	NANOG	0.000520486	8.40888
component_472	Lung	SMAD4	0.000270751	7.92394
component_472	Lung	ERG	3.24345e-06	6.52982
component_472	Lung	ETS1	3.69449e-05	3.98332
component_473	Kidney	JARID2	0.000653928	38.3986
component_473	Kidney	TBX5	0.000653928	38.3986
component_473	Kidney	ELK3	0.000653928	38.3986
component_474	Kidney	NR2C2	1.95708e-06	48.0522
component_474	Kidney	MYOCD	3.39263e-06	38.9932
component_474	Kidney	NKX3-1	2.79592e-05	25.4394
component_474	Kidney	CTNNBIP1	0.000151385	18.0881
component_476	Thymus,Heart,Liver	ATRX	0.000360778	17.5443
component_476	Thymus,Heart,Liver	GATA1	1.24188e-11	7.86368
component_479	Kidney	DBP	2.79063e-07	25.074
component_479	Kidney	TEF	0.00055664	24.0805
component_479	Kidney	HNF1B	3.39498e-07	23.5474
component_479	Kidney	ETV6	0.000813469	21.1302
component_479	Kidney	PPARGC1A	8.19312e-06	14.1965
component_479	Kidney	TFCP2	0.000244138	12.6446
component_479	Kidney	RFXANK	1.71208e-05	12.3192
component_479	Kidney	RFXAP	1.71208e-05	12.3192
component_479	Kidney	HOXA1	1.71208e-05	12.1897
component_479	Kidney	VHL	2.73431e-07	11.4979
component_479	Kidney	RFX1	6.48877e-05	9.98644
component_479	Kidney	RFX5	0.000123809	8.95626
component_479	Kidney	HNF1A	0.000216142	8.15506
component_479	Kidney	MYC	2.73431e-07	7.59457
component_479	Kidney	BRCA1	0.000309806	7.58779
component_479	Kidney	HSF1	6.48877e-05	7.13476
component_479	Kidney	CIITA	1.38606e-05	6.9564
component_479	Kidney	SATB1	0.000813469	6.45231
component_479	Kidney	KLF4	6.48877e-05	5.71633
component_479	Kidney	ESR1	0.000179233	5.08473
component_479	Kidney	HIF1A	0.000287952	4.76575
component_479	Kidney	STAT3	1.94347e-06	4.22859
component_479	Kidney	HDAC1	0.000819884	4.15812
component_479	Kidney	TP53	0.000584576	3.41842
component_479	Kidney	NFKB1	3.39498e-07	2.83303
component_479	Kidney	RELA	1.94347e-06	2.7082
component_480	Kidney	MEF2C	2.73284e-08	59.9704
component_480	Kidney	ATRX	2.13875e-13	35.4723
component_480	Kidney	MEF2A	5.57681e-07	35.1475
component_480	Kidney	CEBPG	5.57681e-07	35.0192
component_480	Kidney	KLF1	5.57681e-07	35.0192
component_480	Kidney	KLF11	8.42125e-07	32.1989
component_480	Kidney	ZNF24	8.43468e-07	31.8779
component_480	Kidney	ETV6	8.43468e-07	31.7724
component_480	Kidney	HIF3A	1.64721e-06	27.732
component_480	Kidney	ILF3	1.64721e-06	27.5726
component_480	Kidney	PCGF2	1.64721e-06	27.415
component_480	Kidney	XRCC5	1.64721e-06	27.2593
component_480	Kidney	ETV7	1.64721e-06	27.2593
component_480	Kidney	SP100	1.64721e-06	27.2593
component_480	Kidney	HOXD1	1.64721e-06	27.2593
component_480	Kidney	ASH1L	3.32753e-06	24.0483
component_480	Kidney	RFX1	4.43126e-16	22.5241
component_480	Kidney	HEY1	3.13243e-11	21.8322
component_480	Kidney	POU1F1	6.17988e-06	21.514
component_480	Kidney	POU2F2	3.70324e-11	21.3703
component_480	Kidney	TRIM28	6.24331e-06	21.1816
component_480	Kidney	ZNF382	6.24331e-06	21.1816
component_480	Kidney	WHSC1	6.24331e-06	21.1816
component_480	Kidney	MEF2D	7.91248e-06	20.2432
component_480	Kidney	RFX5	1.16464e-15	20.2005
component_480	Kidney	BTF3	0.000402001	18.7042
component_480	Kidney	RFXANK	1.66615e-10	18.5237
component_480	Kidney	RFXAP	1.66615e-10	18.5237
component_480	Kidney	LMX1B	1.35293e-05	18.0024
component_480	Kidney	CEBPZ	1.35293e-05	18.0024
component_480	Kidney	NF1	1.35347e-05	17.8683
component_480	Kidney	KLF5	1.35347e-05	17.8683
component_480	Kidney	MAL	2.35793e-05	15.939
component_480	Kidney	HEY2	2.47204e-05	15.7558
component_480	Kidney	ELF3	2.52078e-05	15.6275
component_480	Kidney	SP4	2.52078e-05	15.6021
component_480	Kidney	FOSB	2.71489e-05	15.3524
component_480	Kidney	HOXC6	2.8427e-05	15.1824
component_480	Kidney	FOXF2	2.89664e-05	15.0869
component_480	Kidney	EZH2	2.92561e-05	15.0161
component_480	Kidney	HES1	3.19855e-05	14.7393
component_480	Kidney	LYL1	3.93603e-05	14.09
component_480	Kidney	MKL1	4.14501e-05	13.8861
component_480	Kidney	TFAP2B	5.35549e-05	13.2348
component_480	Kidney	PAX6	6.06165e-05	12.8795
component_480	Kidney	TFCP2	6.53684e-05	12.6754
component_480	Kidney	GATA2	1.18727e-08	12.5101
component_480	Kidney	FLI1	2.53041e-12	11.9245
component_480	Kidney	KLF4	1.16464e-15	11.4604
component_480	Kidney	CIITA	1.81542e-11	10.46
component_480	Kidney	NR3C1	9.31059e-08	10.2898
component_480	Kidney	NFYC	0.000236099	9.96393
component_480	Kidney	NFYA	0.000236099	9.96393
component_480	Kidney	PTTG1	0.000239691	9.91246
component_480	Kidney	LMO2	0.00027917	9.59526
component_480	Kidney	PPARD	0.000309884	9.37037
component_480	Kidney	HOXA1	0.000345543	9.16453
component_480	Kidney	WT1	1.01764e-13	9.12748
component_480	Kidney	HSF1	5.58149e-07	8.58252
component_480	Kidney	TAL1	0.000582911	8.28606
component_480	Kidney	ATF5	0.000634569	8.13847
component_480	Kidney	GATA1	1.40498e-12	7.94968
component_480	Kidney	NFYB	0.00074378	7.88436
component_480	Kidney	HOXD3	0.000826885	7.71323
component_480	Kidney	ESR1	1.98946e-09	7.64563
component_480	Kidney	ERG	2.69999e-09	7.47101
component_480	Kidney	YY1	1.67363e-11	6.94805
component_480	Kidney	SRF	9.29303e-06	6.24691
component_480	Kidney	TWIST2	1.30849e-05	6.01395
[truncated: 3,817 more rows]
