# Supplementary material for: A unified analysis of atlas single-cell data
Source: HighWire-hosted journal article supplement (doi:10.1101/gr.279631.124), 2025-02-18
Supplement: Supplemental_Table_S7.xlsx [file Supplemental_Table_S7.xlsx]

## Sheet: Table S7
Table S7: Runtime and memory usage analysis.
Methods	Memory (HuBMAP)	Time (HuBMAP)	Memory (Fetal)	Time (Fetal)
GIANT	33.93 GB	35 hr 17 min 2 s	8.50 GB	11 hr 50 min 37 s
Harmony	57.53 GB	1 hr 20 min 5 s	30.57 GB	1 hr 27 min 57 s
LIGER	102.53 GB	2 hr 30 min 43 s	78.91 GB	3 hr 16 min 14 s
scVI	2.66 GB	2 hr 1 min 29 s	14.21 GB	2 hr 49 min 16 s
Scanorama	237.62 GB	3 hr 48 min 38 s	158.39 GB	2 hr 36 min 40 s
Seurat	293.16 GB	33 hr 40 min 17 s	280.52 GB	13 hr 06 min 26 s
GLUE	56.32 GB	7 hr 22 min 37 s	43.22 GB	2 hr 39 min 17 s
