# Supplementary material for: A unified analysis of atlas single-cell data
Source: HighWire-hosted journal article supplement (doi:10.1101/gr.279631.124), 2025-02-18
Supplement: Supplemental_Table_S8.xlsx [file Supplemental_Table_S8.xlsx]

## Sheet: Table S8
Table S8: Querying time and memory usage analysis of GIANT.
Dataset	Number of nodes	Time	Memory
HuBMAP	1318103	1 min 19 s	1.45 GB
Fetal	518687	31 s	651.96 MB
